# Supplementary material for: Reinforcement learning optimization of reaction routes on the basis of large, hybrid organic chemistry–synthetic biological, reaction network data
Source: Royal Society of Chemistry journal article supplement (doi:10.1039/d2re00406b), 2023-01-01
Supplement: d2re00406b2.xlsx [file d2re00406b2.xlsx]

## Sheet: Natural precursors
KEGG Molecule ID	Metabolite name	Category	Corresponding Reaxys molecule ID
C00002	ATP	Cofactor	73010
C00044	GTP	Cofactor	74004
C00063	CTP	Cofactor	71190
C00075	UTP	Cofactor	71520
C00081	ITP	Cofactor	600524
C00004	NADH	Cofactor	79324
C00005	NADPH	Cofactor	77911
C00019	SAM	Cofactor	3919754, 28526388
C00101	THF	Cofactor	101190
C00010	CoA	Cofactor	77809
C00006	NADP+	Cofactor	3645734
C00003	NAD+	Cofactor	4120619
C00020	AMP	Cofactor	4892352, 54612
C00008	ADP	Cofactor	67722
C00144	GMP	Cofactor	7670778, 59430
C00035	GDP	Cofactor	69853
C00055	CMP	Cofactor	46982
C00112	CDP	Cofactor	63920
C00105	UMP	Cofactor	47486
C00015	UDP	Cofactor	64707
C00104	IDP	Cofactor	634026
C00130	IMP	Cofactor	630517
C00016	FAD	Cofactor	78150
C01352	FADH2	Cofactor	1208990
C03576	Coenzyme M	Cofactor	1098878
C04628	Coenzyme B	Cofactor	24573616
C00051	Glutathione	Cofactor	1729812, 7545312, 21360362
C00053	PAPS	Cofactor	73511
C00272	Tetrahydrobiopterin	Cofactor	4699705
C01217	THMPT	Cofactor	nan
C00068	TPP	Cofactor	3577792
C00113	PQQ	Cofactor	3596812
C00138	Reduced ferredoxin	Cofactor	nan
C00139	Oxidized ferredoxin	Cofactor	nan
C00001	H2O	Free metabolite	16953050, 28692842, 15994744, 16262803, 16503633, 18259376, 16484106, 15994867, 17718728, 16475737, 28983178, 16532872, 17669282, 15936966, 6133474, 16478368, 16474573, 14405424, 16835842, 15937459, 16485385, 3902901, 15994743, 16289331, 3587155, 16733579, 16490171, 17669283, 16999929
C00007	Oxygen	Free metabolite	16504248, 4950925, 16868313, 16514885, 22989299, 26591375, 27987247, 16855942, 3587218, 16770786, 11335911, 30719131, 31585248
C00009	Orthophosphate	Free metabolite	17464813, 1921286
C00011	CO2	Free metabolite	1900390, 6052058
C00013	Diphosphate	Free metabolite	3942075
C00014	Ammonia	Free metabolite	14680594, 16481245, 16344183, 14975703, 16480090, 16504355, 16645898, 16497709, 16853108, 16752555, 16051411, 3587154, 9757005, 16513264, 17464070
C00027	Hydrogen peroxide	Free metabolite	3587191
C00058	Formate	Free metabolite	1209246
C00059	Sulfate	Free metabolite	19242250, 2037554, 18778845, 27746102
C00067	Formaldehyde	Free metabolite	32615592, 1209228
C00080	H+	Free metabolite	nan
C00086	Urea	Free metabolite	27881231, 635724
C00087	Sulfur	Free metabolite	nan
C00088	Nitrite	Free metabolite	3903200
C00094	Sulfite	Free metabolite	3903323
C00132	Methanol	Free metabolite	1098229, 5725793, 6378986
C00169	Carbamoyl phosphate	Free metabolite	1907679
C00175	Cobalt ion	Free metabolite	nan
C00177	Cyanide ion	Free metabolite	1900509
C00192	Hydroxylamine	Free metabolite	3587190
C00218	Methylamine	Free metabolite	5489676, 741851, 31122354
C00237	CO	Free metabolite	nan
C00244	Nitrate	Free metabolite	3587310
C00265	Dithiothreitol	Free metabolite	2036371
C00282	Hydrogen	Free metabolite	23163263, 27944166, 16818691, 16514685, 28182329, 3587189
C00283	Hydrogen sulfide	Free metabolite	16505834, 29006369, 16756646, 16812026, 16506507, 16744421, 16863400, 16023721, 16833861, 18081525, 16514169, 16815166, 16479810, 16862395, 16510798, 16482190, 21096201, 16856368, 3902903, 18146804, 16882310, 16756647, 18088677, 16708589, 16866405, 16771669, 15993707, 16509361, 16861985, 16733544, 16502675, 15917942, 16866223, 16860251, 16742934, 4921294, 3535004
C00288	HCO3-	Free metabolite	3903504
C00305	Magnesium cation	Free metabolite	nan
C00320	Thiosulfate	Free metabolite	nan
C00409	Methanethiol	Free metabolite	5489674, 1696840
C00488	Formamide	Free metabolite	505995
C00533	Nitric oxide	Free metabolite	14534636, 3587257, 20447947
C00536	Triphosphate	Free metabolite	5957877
C00697	Nitrogen	Free metabolite	16825577, 23131181, 18239691, 3535119
C00698	Cl-	Free metabolite	nan
C00703	Mercury(2+)	Free metabolite	nan
C00704	O2.-	Free metabolite	nan
C00708	Iodide	Free metabolite	nan
C00742	Fluoride	Free metabolite	nan
C00887	Nitrous oxide	Free metabolite	nan
C00950	Dithioerythritol	Free metabolite	1719756
C01041	Monodehydroascorbate	Free metabolite	nan
C01119	Oxidized dithiothreitol	Free metabolite	5726667
C01319	Hg	Free metabolite	18081698, 15903819, 7366473, 15991314, 9385639, 3587187, 16123809
C01324	Bromide	Free metabolite	nan
C01326	Hydrogen cyanide	Free metabolite	16887861, 16887860, 1718793
C01327	Hydrochloric acid	Free metabolite	7801727, 14681183, 16502419, 15913435, 16501060, 16475562, 24608586, 19834398, 16270663, 16836402, 3587171, 3587163, 1098214
C01328	HO-	Free metabolite	3587167
C01353	Carbonic acid	Free metabolite	1900717, 23663370, 17755156, 18029277
C01382	Iodine	Free metabolite	3587194, 3535240, 4857217
C01417	Cyanate	Free metabolite	1732479
C01438	Methane	Free metabolite	22923218, 16210409, 27904106, 31767133, 17199598, 16290583, 31939934, 16707699, 16770476, 16504514, 23124799, 30914243, 18162417, 16488242, 8253279, 17121186, 15900809, 8137357, 16030247, 16418587, 18162513, 16609798, 17606888, 5489265, 23669189, 23044551, 16014509, 27027367, 23479886, 16708305, 16704909, 4360473, 6378772, 22919006, 22966207, 22939136, 24624233, 16504771, 17182792, 15997356, 1630…
C01485	Chloric acid	Free metabolite	3903350
C01486	Chlorous acid	Free metabolite	3660334
C01528	Hydrogen selenide	Free metabolite	10151653, 15536765, 16692571, 18749555, 23133490, 16472924, 16472858, 17196123, 16165022, 6093358, 17063703, 23023114, 16875309, 16885899, 23433037, 28308260, 16851510, 28308259, 11342956, 18030207, 26765931, 17804515, 16699153, 3924735, 16505718, 16776852, 23418696, 23045768, 16770126, 17520944, 16535037, 21370325, 21053632, 17057162, 16866783, 16982622, 16487913, 31934993, 16866790, 16845208, 1…
C01563	Carbamate	Free metabolite	1734754
C01566	Cyanamide	Free metabolite	1732569
C01755	Thiocyanate	Free metabolite	1732480
C01818	Hyponitrite	Free metabolite	8677461
C01861	Trithionate	Free metabolite	15996338
C02084	Tetrathionate	Free metabolite	4921778
C02271	Dichloromethane	Free metabolite	6590996, 30955472, 1730800
C02306	Phosphoramidate	Free metabolite	4921458
C02405	Formyl phosphate	Free metabolite	1905573
C02466	Trimetaphosphoric acid	Free metabolite	7818708
C02661	Bromochloromethane	Free metabolite	1730801
C02704	Monomethyl sulfate	Free metabolite	1701229
C03124	beta-L-Aspartylhydroxamate	Free metabolite	nan
C05172	Selenophosphoric acid	Free metabolite	nan
C05360	Diimine	Free metabolite	2423735, 16464178
C05361	Hydrazine	Free metabolite	878137, 26847214
C05590	Hydroiodic acid	Free metabolite	13191432, 7801729, 3924806, 13260132, 4857092, 7183122, 15654752, 3587159, 19235722, 14314981, 3587184
C05684	Selenite	Free metabolite	3903581
C05697	Selenate	Free metabolite	28460199, 3903546
C05703	Methaneselenol	Free metabolite	1730727
C05765	L-Glutamyl 1-phosphate	Free metabolite	10443097
C06232	Molybdate	Free metabolite	16825264, 3903547
C06312	L-Tagatose 6-phosphate	Free metabolite	nan
C06455	Hydroxymethylphosphonate	Free metabolite	1811747
C06456	Phosphonoformate	Free metabolite	1756501
C06484	4,5-cis-Dihydroxy-1,2-dithiacyclohexane	Free metabolite	1280352
C06697	Arsenite	Free metabolite	13287831
C06701	Phosphonic acid	Free metabolite	1209272
C07044	Hydroxyurea	Free metabolite	1741548
C07294	Methylarsonate	Free metabolite	1739373
C07295	Methanearsonous acid	Free metabolite	2231128
C07331	Carbonyl sulfide	Free metabolite	4857603, 1697284
C09306	Sulfur dioxide	Free metabolite	19242052, 3535237
C11145	Methanesulfonic acid	Free metabolite	1446024
C11215	Arsenate ion	Free metabolite	nan
C11481	HSO3-	Free metabolite	nan
C13645	Hydrobromic acid	Free metabolite	7801728, 8137367, 19231194, 32435652, 3587179, 3587164, 16767870, 17252122, 16350067, 3587158, 16953049
C14818	Fe2+	Free metabolite	nan
C14819	Fe3+	Free metabolite	nan
C15497	1-(beta-D-Ribofuranosyl)-1,4-dihydronicotinamide	Free metabolite	487793
C16213	2,3-Dihydroxynaphthalene	Free metabolite	742375
C16487	Hydrofluoric acid	Free metabolite	17804308, 31497443, 7631393, 30535914, 3535002, 3587168, 31990450, 31364145, 22706559, 31535339, 15346168, 12273154, 16484530, 29920556, 27914016, 16845862, 9189014
C17349	Guanidine	Free metabolite	506044
C17368	8-Dehydroxythienamycin	Free metabolite	nan
C17369	Northienamycin	Free metabolite	nan
C17943	Formylphosphonate	Free metabolite	nan
C18011	7-Hydroxy-6-methylhepta-3,5-dienal	Free metabolite	nan
C18448	Methyl iodide	Free metabolite	4241733, 4949138, 8109746, 4173812, 969135
C18672	Methylmercury	Free metabolite	3902999
C18835	(R)-DNPA	Free metabolite	nan
C18902	Methylselenic acid	Free metabolite	9616522, 1734752, 9616521
C19033	Carbon disulfide	Free metabolite	1098293
C19568	N-Nitrosomethanamine	Free metabolite	2344553
C19610	Manganese(2+)	Free metabolite	nan
C19611	Manganese(3+)	Free metabolite	nan
C19680	N,N-Dimethyl-4-nitrosoaniline	Free metabolite	607293
C19681	4-(Hydroxylamino)-N,N-dimethylaniline	Free metabolite	1865342
C19697	Hypochlorous acid	Free metabolite	3660026, 14316411
C20396	Methylphosphonate	Free metabolite	1739372
C20817	nan	Free metabolite	nan
C20818	nan	Free metabolite	nan
C20822	nan	Free metabolite	nan
C20823	nan	Free metabolite	nan
C20911	nan	Free metabolite	nan
C20912	nan	Free metabolite	nan
C20937	nan	Free metabolite	8677450
C20969	Carboxyphosphate	Free metabolite	nan
C21154	N-Methylmyosmine	Free metabolite	121228

## Sheet: Reaxys commercial molecules
Reaxys molecule ID	SMILES	Price (USD/g)
106291	OCc1ccco1	0.053
112133	c1ccc2[nH]nnc2c1	0.06
1905952	O=C(O)/C=C/c1ccccc1	0.066
1730872	CC(C)(C)Cl	0.069
6184741	CC(C)(C)Cl	0.069
605291	CC(C)(CO)CO	0.079
106420	CN1CCCC1=O	0.08
1100566	NS(=O)(=O)c1ccccc1	0.09
878307	OCc1ccccc1	0.09
1847535	CC1CCCCC1O	0.092
8691922	CC1CCCCC1O	0.092
8691923	CC1CCCCC1O	0.092
5932692	Nc1ncc(C(F)(F)F)cc1Cl	0.1
1364011	OCCOc1ccccc1	0.1
2044951	Oc1cccc2c(O)cccc12	0.106
27143556	CC12CCC(CC1=O)C2(C)C	0.13
3588456	CC12CCC(CC1=O)C2(C)C	0.13
6475829	CC12CCC(CC1=O)C2(C)C	0.13
1907611	CC12CCC(CC1=O)C2(C)C	0.13
3546256	O=C1c2ccccc2-c2ccccc21	0.132
1636531	O=C1c2ccccc2-c2ccccc21	0.132
606053	CC(=O)c1ccc(C)cc1	0.132
1730892	CC(C)(C)Br	0.138
102724	CN1CCNCC1	0.138
106325	Cc1cc(C)[nH]n1	0.138
2208676	N[C@@H](C(=O)O)c1ccccc1	0.138
109599	O=C(O)c1ccncc1	0.138
1102362	Cc1ccccc1S(N)(=O)=O	0.164
3675792	Cl.ClCCN1CCCCC1	0.164
970526	Cc1cccc(C(=O)O)c1	0.168
110149	O=C(O)c1ccco1	0.172
907196	O=C(O)c1ccc(Cl)cc1	0.173
386123	CC(=O)c1ccccc1O	0.178
956591	CCOC(=O)OCC	0.184
972145	O=C(O)Cc1ccc(F)cc1	0.192
110309	Cc1ccc2ccccc2n1	0.192
108737	Nc1ccc(Br)cn1	0.196
4229953	CC(C)C(N)C(=O)O	0.198
506689	CC(C)C(N)C(=O)O	0.198
8253832	CC(C)C(N)C(=O)O	0.198
103390	OCCN1CCCCC1	0.198
6130713	CC(C)C(N)C(=O)O	0.198
4654966	CC(C)C(N)C(=O)O	0.198
907949	O=C(O)COc1ccccc1	0.2
1746674	CC(C)(C)C(=O)CC#N	0.2
1857542	OCCCc1ccccc1	0.2
774605	COc1ccc(OC)cc1	0.2
1723539	O=C(O)CC(O)C(=O)O	0.2
104361	OCCN1CCNCC1	0.2
8036414	O=C(O)CC(O)C(=O)O	0.2
4660744	O=C(O)CC(O)C(=O)O	0.2
1934615	NC(=O)Nc1ccccc1	0.2
4660743	O=C(O)CC(O)C(=O)O	0.2
107693	c1ccc2[nH]ccc2c1	0.2
109468	c1ccc2scnc2c1	0.2
1072103	Cc1ccccc1C(=O)O	0.2
4291637	O=C(O)CC(O)C(=O)O	0.2
4393542	c1ccc2[nH]ccc2c1	0.2
16527350	Oc1cccc2ccccc12	0.2
4248100	Oc1cccc2ccccc12	0.2
607545	CC(C)(C)c1ccc(C(=O)O)cc1	0.2
1759501	C=C(CC(=O)O)C(=O)O	0.2
1304452	CC(CO)(CO)CO	0.2
11837746	O=C(O)CC(O)C(=O)O	0.2
1306359	COC(=O)C1CCCCC1	0.2
1817321	Oc1cccc2ccccc12	0.2
4994901	COc1ccc(OC)cc1	0.2
5246123	O=C(O)CC(O)C(=O)O	0.2
119250	c1ccc(C2=NCCN2)cc1	0.2
969480	CC(C)(C)C(=O)O	0.2
506167	O=C(O)CBr	0.2
1909333	O=C(O)c1ccc(C(=O)O)cc1	0.2
774355	CC(=O)c1ccc(O)cc1	0.2
105778	Cc1cnccn1	0.216
971265	O=C(O)c1ccccc1F	0.22
1817645	Cc1ccc(O)c(C(C)(C)C)c1	0.232
108513	Nc1cccc(N)n1	0.234
774117	Cc1cc(C)cc(O)c1	0.238
80119	CC1(C)OCC(CO)O1	0.24
82131	O=C1CCC(C(=O)O)N1	0.24
14338689	O=C1CCC(C(=O)O)N1	0.24
15719220	CC(C)(C)C1CCC(O)CC1	0.24
107050	Cc1ccc(N)nc1	0.24
4839855	CC1(C)OCC(CO)O1	0.24
22400837	CC(C)(C)C1CCC(O)CC1	0.24
3613002	Cl.NC1CCCCC1	0.24
1902277	CC(C)(C)C1CCC(O)CC1	0.24
22400840	CC(C)(C)C1CCC(O)CC1	0.24
5812188	Cc1cc(=O)[nH]c(=O)[nH]1	0.24
742047	CC(=O)/C=C/c1ccccc1	0.24
1903999	OCC=Cc1ccccc1	0.24
21490952	CC(C)(C)C1CCC(O)CC1	0.24
10353310	CC(C)(C)C1CCC(O)CC1	0.24
1740427	CC(C)(C)CC(=O)O	0.24
744100	O=C(O)c1cc2ccccc2cc1O	0.24
21490953	CC(C)(C)C1CCC(O)CC1	0.24
27619302	CC(C)(C)C1CCC(O)CC1	0.24
4666643	O=C1CCC(C(=O)O)N1	0.24
5239399	CC1(C)OCC(CO)O1	0.24
115647	Cc1cc(=O)[nH]c(=O)[nH]1	0.24
605691	SC1=NCCN1	0.24
27619279	CC(C)(C)C1CCC(O)CC1	0.24
1072816	O=C(O)Cc1ccc(Cl)cc1	0.24
107066	Cc1ccnc(N)c1	0.262
112264	Cc1nc2ccccc2[nH]1	0.264
109868	Nc1ncccc1O	0.264
80811	O=C(O)[C@H]1CCCN1	0.264
508906	C1CCC2=NCCCN2CC1	0.28
110354	CN(C)c1ccncc1	0.28
3589442	NC(Cc1ccccc1)C(=O)O	0.28
14311135	O=C(O)C1CCC(C(=O)O)CC1	0.28
508160	O=C(O)c1cccc(O)c1	0.28
1811765	O=C(CCl)NCO	0.28
10535193	NC(Cc1ccccc1)C(=O)O	0.28
742313	COc1ccc(C(C)=O)cc1	0.28
3589441	NC(Cc1ccccc1)C(=O)O	0.28
1340501	CC(C)(O)C(C)(C)O	0.28
104375	OCCN1CCOCC1	0.28
1870377	O=C(O)C1CCC(C(=O)O)CC1	0.28
4669366	NC(Cc1ccccc1)C(=O)O	0.28
111110	COC(=O)c1ccco1	0.28
1906922	O=C(O)c1ccc(F)cc1	0.28
2115365	O=C(OCc1ccccc1)c1ccccc1O	0.28
112169	Cc1occc(=O)c1O	0.28
508910	COc1ccc(C(=O)O)cc1	0.28
6391572	CC(=O)c1ccc(Cl)cc1	0.28
102971	CCN1CCNCC1	0.28
108808	CN1CCN(C)C1=O	0.28
4669367	NC(Cc1ccccc1)C(=O)O	0.28
8256685	NC(Cc1ccccc1)C(=O)O	0.28
509929	COc1ccccc1C(=O)O	0.28
80420	CC1CCC(=O)O1	0.28
386014	CC(=O)c1ccc(Cl)cc1	0.28
6802401	COc1ccc(CO)cc1	0.28
114249	Cc1ncsc1CCO	0.28
30648564	O=C(O)c1ccc(F)cc1	0.28
473257	N#Cc1ccncc1	0.28
974438	O=C(O)c1ccc2ccccc2c1O	0.28
2416523	CCNS(=O)(=O)c1ccc(C)cc1	0.28
107712	N#Cc1ccncc1	0.28
14334738	O=C(O)C1CCC(C(=O)O)CC1	0.28
6767804	NC(Cc1ccccc1)C(=O)O	0.28
1910407	NC(Cc1ccccc1)C(=O)O	0.28
111151	Clc1ccc(Cl)nn1	0.28
636654	COc1ccc(CO)cc1	0.28
27029496	CC1CCC(=O)O1	0.28
1859408	COc1ccc2ccccc2c1	0.29
2219046	NS(=O)(=O)c1cc(C(=O)O)c(Cl)cc1Cl	0.298
973355	O=C(O)c1ccc(F)cc1F	0.316
511583	O=S(=O)(Cl)c1ccc(Cl)cc1	0.316
774114	CC(=O)NCC(=O)O	0.32
20130084	O=C(O)[C@@H]1CCCN1	0.32
4991853	N#Cc1ccc(Cl)cc1	0.32
774921	COC(=O)C=Cc1ccccc1	0.32
1238804	CCOC(=O)C=Cc1ccccc1	0.32
396360	Nc1cccc2c1C(=O)c1ccccc1C2=O	0.32
608199	O=C(O)c1ccccc1C(=O)O	0.32
1211804	O=C(O)COc1ccc(Cl)cc1	0.32
1100638	CCC(=O)c1ccc(Cl)cc1	0.32
506496	CC(C)(N)C(=O)O	0.32
1865635	NC(=O)OCc1ccccc1	0.32
742046	CC(=O)C=Cc1ccccc1	0.32
137110	O=C(O)c1cccnc1C(=O)O	0.32
1908172	CCOC(=O)c1ccccc1	0.32
635779	COC(N)=O	0.32
1868192	O=C(O)c1ccc(Cl)cc1Cl	0.32
1720666	CCC(C)(C)C(=O)O	0.32
907511	CCC(=O)c1ccc(O)cc1	0.32
80810	O=C(O)[C@@H]1CCCN1	0.32
1072122	N#Cc1ccc(Cl)cc1	0.32
506796	CC(=O)CCC(=O)O	0.32
8767600	CCOC(=O)c1ccccc1	0.32
119302	C=CC(=O)N1CCOCC1	0.32
107274	COC1CCC=CO1	0.32
1905732	OCCc1ccccc1	0.32
777776	O=C(c1ccccc1)c1ccc(O)cc1	0.32
7817137	Nc1cccc2c1C(=O)c1ccccc1C2=O	0.32
106985	OCCc1cccs1	0.324
507950	O=C(CCl)c1ccccc1	0.328
1099858	O=C(O)CC(S)C(=O)O	0.328
1361437	CC(C)(O)CCC(C)(C)O	0.328
107804	CC(C)c1ncc[nH]1	0.33
742796	O=[N+]([O-])c1ccc(CBr)cc1	0.332
5529310	O=[N+]([O-])c1ccc(CBr)cc1	0.332
1720418	CC=CC(=O)OCC	0.348
973774	O=C(O)c1c(F)cccc1F	0.352
7202094	CC(C)(C)OC(=O)N1CCC(O)CC1	0.356
4782268	NC(C(=O)O)c1ccccc1	0.36
4292400	NC(C(=O)O)c1ccccc1	0.36
116315	Nc1nc2ccccc2s1	0.36
4653730	CCC(C)C(=O)O	0.36
608018	NC(C(=O)O)c1ccccc1	0.36
1098537	CCC(C)C(=O)O	0.36
907340	O=C(O)c1ccccc1Cl	0.36
5733253	NC(C(=O)O)c1ccccc1	0.36
1902271	OCC1CCC(CO)CC1	0.36
12131520	OCC1CCC(CO)CC1	0.36
4666510	NC(C(=O)O)c1ccccc1	0.36
6130638	CCC(C)C(=O)O	0.36
5251735	NC(C(=O)O)c1ccccc1	0.36
12114746	OCC1CCC(CO)CC1	0.36
3271849	Cc1cc(S(N)(=O)=O)c(C)cc1Cl	0.363158
115875	c1ccc(Cc2ccccn2)cc1	0.368
907515	O=C(O)CCc1ccccc1	0.37
81441	O=C(O)[C@@H]1C[C@@H](O)CN1	0.384
112305	O=C(O)c1cnccn1	0.384
19014620	CC1CCC(O)CC1	0.4
1618110	CCc1occc(=O)c1O	0.4
6501088	CCCC(=O)c1ccccc1	0.4
4994870	N#Cc1ccccc1Cl	0.4
19014621	CC1CCC(O)CC1	0.4
508305	CCCC(=O)c1ccccc1	0.4
878995	CCN(CC)c1cccc(C)c1	0.4
15713944	CC1CCC(O)CC1	0.4
507452	CC1CC(=O)CC(C)(C)C1	0.4
15713941	CC1CCC(O)CC1	0.4
7175265	CCN(CC)c1cccc(C)c1	0.4
107048	Cc1cccc(N)n1	0.4
1363916	N#Cc1ccccc1Cl	0.4
1445998	CC1CCC(O)CC1	0.4
115762	CCOC(=O)c1cn[nH]c1	0.4
1860514	Cc1ccc(C(C)C)cc1O	0.4
3649667	O=C1N[C@@H](Cc2ccccc2)CO1	0.41
1101514	CC(C)(C)OC(=O)NCC(=O)O	0.424
1726365	C[C@H](NC(=O)OC(C)(C)C)C(=O)O	0.43
507955	Clc1ncc(Br)cn1	0.43
1816777	O=C(O)C1CCC1	0.438
2051752	Cc1cc(Cl)ccc1OCC(=O)O	0.44
607809	Cc1ccc(-c2cn[nH]n2)cc1	0.44
1721646	C[C@@H](O)[C@H](N)C(=O)O	0.44
8263127	CC(Oc1cccc(Cl)c1)C(=O)O	0.44
108054	NCc1ccccn1	0.44
1876444	CC(Oc1cccc(Cl)c1)C(=O)O	0.44
1721647	C[C@@H](O)[C@H](N)C(=O)O	0.44
110008	N#Cc1cnccn1	0.44
81505	CC1Cc2ccccc2N1	0.456
775898	O=C(O)Cc1cccc(F)c1	0.46
1853950	Oc1cccc(Br)c1	0.468
972146	O=C(O)Cc1ccc(Br)cc1	0.47
509876	CCC(C(=O)O)c1ccccc1	0.48
2042965	N#CCc1cccc(Cl)c1	0.48
4665266	CCC(C(=O)O)c1ccccc1	0.48
5250635	CCC(C(=O)O)c1ccccc1	0.48
131856	O=C1CCN(c2ccccc2)N1	0.498
5340292	COc1ccc(C(=O)c2ccccc2)cc1	0.5
16527315	Oc1ccc2ccccc2c1	0.5
6391567	CC(=O)c1cccc(Br)c1	0.5
108477	Brc1cncc(Br)c1	0.5
1098522	CC(C)CC(=O)O	0.5
13196915	Cc1cc(C)nc(C)c1	0.5
606221	CNCc1ccccc1	0.5
4994899	COc1cccc(OC)c1	0.5
878582	COc1cccc(OC)c1	0.5
1754069	O=C(O)CCC(=O)O	0.5
907182	Cc1ccccc1CC#N	0.5
1104713	COc1ccc(C(=O)c2ccccc2)cc1	0.5
107711	N#Cc1cccnc1	0.5
2085848	O=C(O)c1ccc(F)c(F)c1	0.5
742604	N#Cc1ccccc1CCl	0.5
2205871	CC(C)Nc1ccccc1	0.5
2042182	OCc1ccccc1Cl	0.5
107283	Cc1cc(C)nc(C)c1	0.5
127752	Nc1nc2ccc(Cl)cc2s1	0.5
635810	CCOC(N)=O	0.5
4991854	N#Cc1ccc(Br)cc1	0.5
2047493	COC(=O)c1ccc(C(C)(C)C)cc1	0.5
1906920	O=C(O)c1cccc(F)c1	0.5
22779170	CCOC(=O)CN.Cl	0.5
2041518	N#Cc1ccc(Br)cc1	0.5
105104	NCCCN1CCOCC1	0.5
3684083	Cl.ClCCN1CCOCC1	0.5
109781	Cc1cc2ccccc2[nH]1	0.5
15828	CC(C)(C)OC(=O)N1CCC[C@H]1C(=O)O	0.5
1720655	CCCC(C)C(=O)O	0.5
507600	Cc1ccc(C(=O)O)cc1	0.5
122937	CCOC(=O)c1cccnc1	0.5
3594034	CCOC(=O)CN.Cl	0.5
2044776	O=C(O)c1cc(Cl)cc(Cl)c1	0.5
2208678	O=C(O)[C@@H](O)c1ccccc1	0.5
19769266	O=C(O)[C@@H](O)c1ccccc1	0.5
109603	Cc1cnc(N)s1	0.5
607374	O=C1CCCc2ccccc21	0.5
1375488	COC(=O)c1ccccc1C(=O)c1ccccc1	0.5
507599	CC(=O)c1cccc(Br)c1	0.5
742134	Oc1ccc2ccccc2c1	0.5
4405073	Cc1cc2ccccc2[nH]1	0.5
1072182	Cc1cc(C)cc(C(=O)O)c1	0.5
131629	O=C(O)c1cccc(C(=O)O)n1	0.5
1720305	CC(C)=CC(=O)O	0.5
23765816	CCOC(=O)CN.Cl	0.5
4247319	Oc1ccc2ccccc2c1	0.5
23778394	Cl.ClCCN1CCOCC1	0.5
2417	C1CN=C2CCCN2C1	0.5
114551	O=C(O)Cc1cccs1	0.52
1741912	CC(C)CCC(=O)O	0.52
878265	CCOC(=O)NN	0.53
7641952	O=c1[nH]c(=O)c2nc[nH]c2[nH]1	0.538
609330	O=c1[nH]c(=O)c2nc[nH]c2[nH]1	0.538
983249	CC1=C(C(=O)Nc2ccccc2)SCCO1	0.55
2695478	O=C(O)c1ccc(C(F)(F)F)cc1O	0.55
114305	Cc1nc(Cl)cc(Cl)n1	0.55
107758	O=C1NCCCN1	0.55
639763	COc1ccc(Br)c(C(=O)O)c1	0.55
22561472	COc1ccc(S(N)(=O)=O)cc1F	0.552
1946215	O=C(O)c1ccc(F)cc1Cl	0.56
1743766	CCOC(=O)CO	0.56
2045132	COC(=O)c1ccc(Br)cc1	0.56
1364028	Cc1cc(O)ccc1C(C)C	0.57
112665	CC1(C)CC(=O)CC(C)(C)N1	0.57
2046884	COc1ccc(Br)cc1OC	0.57
106251	O=C1NCCO1	0.6
1308891	NS(=O)(=O)c1ccc(Cl)cc1	0.6
106381	CCc1ncc[nH]1	0.6
508290	BrCCOc1ccccc1	0.6
970529	O=C(O)C1CCCCC1	0.6
26601720	NS(=O)(=O)c1ccc(Cl)cc1	0.6
1723837	CC(=O)N[C@H](C(=O)O)C(C)C	0.6
2041840	CCc1ccc(C(=O)O)cc1	0.6
2937540	NS(=O)(=O)c1ccccc1Cl	0.6
386015	CC(=O)c1ccc(Br)cc1	0.6
974222	CNS(=O)(=O)c1ccc(C)cc1	0.6
14543722	N[C@H](C(=O)O)c1ccccc1	0.6
386013	CC(=O)c1ccc(F)cc1	0.6
2047573	COc1ccccc1CC(=O)O	0.6
135926	O=c1[nH][nH]c(=O)c2ccccc12	0.6
2803140	CN(CCO)c1ccccc1	0.6
6197153	CC(=O)c1ccc(Br)cc1	0.6
969454	CCCCC(=O)O	0.6
2044777	O=C(O)c1ccc(Cl)c(Cl)c1	0.6
509162	COc1ccc(CC#N)cc1	0.6
105039	CC1(C)CC(O)CC(C)(C)N1	0.6
1909332	O=C(O)c1cccc(C(=O)O)c1	0.6
1747025	CC(C)(CO)C(=O)O	0.6
128556	O=C1CCN(Cc2ccccc2)CC1	0.6
1948767	O=C(O)Cc1ccc(Cl)cc1Cl	0.6
607745	c1ccc(-c2nn[nH]n2)cc1	0.6
2208675	N[C@H](C(=O)O)c1ccccc1	0.6
1101737	COc1ccc(CC(=O)O)cc1	0.6
7873323	COc1ccc(CC(=O)O)cc1	0.6
607036	CC(=O)Nc1ccc(C)cc1	0.61
1732046	OCC(O)CS	0.63
1102980	O=C(Nc1ccccc1)c1ccccc1	0.64
878552	COc1cccc(C(C)=O)c1	0.65
1940712	N#Cc1cccc(C(F)F)c1	0.69
3320726	NS(=O)(=O)c1ccc(Oc2ccccc2)cc1	0.69
3690485	Cc1[nH]cnc1CO.Cl	0.69
2092660	O=C(CCl)c1ccc(O)c(O)c1	0.69
2209642	COc1cccc(C(=O)O)c1O	0.7
6193303	CC(=O)c1ccccc1	0.7
3128493	COC(=O)Cc1ccccc1Cl	0.7
4128809	CC(=O)c1ccccc1	0.7
106908	CCn1ccnc1	0.7
2049239	O=C(O)c1cccc(C(F)(F)F)c1	0.7
3604491	CC(=O)c1ccccc1	0.7
116149	c1ccc2c(c1)CCCN2	0.7
2042383	Oc1ccc2ccc(O)cc2c1	0.7
2045663	Oc1cccc(C(F)(F)F)c1	0.7
605842	CC(=O)c1ccccc1	0.7
4991851	N#Cc1cccc(Br)c1	0.7
2210998	N[C@@H](C(=O)O)c1ccc(O)cc1	0.7
956592	COC(=O)C=C(C)N	0.7
1711290	CC(C)[C@H](NC(=O)OC(C)(C)C)C(=O)O	0.7
511834	COc1cc(OC)cc(C(=O)O)c1	0.7
773712	OCC1CCCCC1	0.7
1858942	N#Cc1cccc(Br)c1	0.7
2804068	N[C@H](Cc1ccccc1)C(=O)O	0.72
887023	Cc1cccc(C)c1NC(=O)CN1CCNCC1	0.72
5238669	CC(Br)C(=O)O	0.72
6564902	CC(Br)C(=O)O	0.72
2043574	COC(=O)c1cccc(C)c1	0.72
6188756	CC(Br)C(=O)O	0.72
6631222	CC(Br)C(=O)O	0.72
605451	CC(Br)C(=O)O	0.72
110926	Cc1ccnc2ccccc12	0.72
1868220	NC(=O)c1ccccc1C(N)=O	0.74
120800	Cc1nc2cc(Cl)ccc2o1	0.74
6131421	O=S(=O)(Cl)c1ccc(Br)cc1	0.76
116156	c1ccc2c(c1)CCNC2	0.76
122940	COC(=O)c1ccc(C)nc1	0.76
743518	O=S(=O)(Cl)c1ccc(Br)cc1	0.76
1280477	O=C1C=CCCC1	0.77
146038	NC1CCN(Cc2ccccc2)CC1	0.776
606632	N#Cc1cn[nH]c1N	0.79
637860	O=C(CCl)c1ccc(F)cc1	0.79
2242511	OCc1cccc(F)c1	0.79
3600116	Cc1ccc(S(=O)(=O)O)cc1.NCC(=O)OCc1ccccc1	0.79
124441	Clc1ncc(Br)c(Cl)n1	0.79
2613800	Cc1ccc(Br)cc1C(=O)O	0.792
111205	OCCc1ccccn1	0.8
387187	O=[N+]([O-])c1ccc(CCl)cc1	0.8
122942	CCOC(=O)c1ccncc1	0.8
117856	O=c1cnc2ccccc2[nH]1	0.8
1742331	C=CC(=O)NC(C)(C)C	0.8
30808857	CCOC(=O)CNC.Cl	0.8
2210860	COc1ccc(C(=O)O)c(OC)c1	0.8
617090	OC(Cn1ccnc1)c1ccc(Cl)cc1Cl	0.8
1817837	CC(C)(C(=O)O)c1ccccc1	0.8
1863771	CCCOC(=O)c1ccccc1	0.8
3650464	CC1(C(=O)O)CCC(C(=O)O)C1(C)C	0.8
1364621	COc1ccccc1OC	0.8
88579	O=C(O)[C@@H]1CCCN1C(=O)OCc1ccccc1	0.8
5430749	COc1ccccc1OC	0.8
113815	Cc1cc(O)cc(=O)o1	0.8
6197483	CC(=O)c1ccccc1Cl	0.8
1909167	N#Cc1c(Cl)cccc1Cl	0.8
2207356	COC(=O)c1ccccc1OC	0.8
1907195	OCc1ccccc1O	0.8
3911182	CCOC(=O)CNC.Cl	0.8
18815386	CC1(C(=O)O)CCC(C(=O)O)C1(C)C	0.8
1858916	CC(=O)c1ccccc1Cl	0.8
119510	O=c1[nH]sc2ccccc12	0.8
2208364	COc1cc(C(=O)O)ccc1O	0.8
2043683	N#CCc1ccccc1Cl	0.8
5431574	O=[N+]([O-])c1ccc(CCl)cc1	0.8
1909591	COC(=O)CCc1ccccc1	0.8
112001	Cc1cccnc1C#N	0.8
22264063	CC1(C(=O)O)CCC(C(=O)O)C1(C)C	0.8
970126	CC(C)=NNC(N)=S	0.8
2050202	CC1(C(=O)O)CCC(C(=O)O)C1(C)C	0.8
1910978	O=C(O)C(c1ccccc1)c1ccccc1	0.8
1912549	CC(=O)NC(=Cc1ccccc1)C(=O)O	0.82
116595	Cc1cc2nc[nH]c2cc1C	0.82
2041490	Cc1cc(F)ccc1O	0.82
114692	O=C1Cc2ccccc2N1	0.82
1862493	COC(=O)c1ccccc1F	0.84
2046000	CC(=O)OCC=Cc1ccccc1	0.84
2036658	OC1CCC(O)CC1	0.84
8146177	OC1CCC(O)CC1	0.84
8146176	OC1CCC(O)CC1	0.84
2118346	NS(=O)(=O)c1cc(C(=O)O)ccc1Cl	0.86
3648840	C[C@@H](CO)NC(=O)OC(C)(C)C	0.86
3573829	O=C([O-])c1cccnc1.[Na+]	0.88
1731456	CCC(C)(O)CC	0.88
2076770	CC(C)(O)CCc1ccccc1	0.88
115150	COc1ccc(Br)cn1	0.88
1934550	CCCc1ccc(C(=O)O)cc1	0.88
2207349	CCOc1ccc(C(=O)O)cc1	0.9
2047480	NC(=O)c1c(F)cccc1F	0.9
607217	CNc1ccccc1C(=O)OC	0.9
1720441	CCCC=CC(=O)O	0.902
7589337	O=C(CBr)c1ccc([N+](=O)[O-])cc1	0.92
393567	O=C(CBr)c1ccc([N+](=O)[O-])cc1	0.92
106434	O=C1CCCCN1	0.924
2044019	O=C(O)C=Cc1cccc(Cl)c1	0.93
641898	O=S(=O)(Cl)c1ccc2ccccc2c1	0.93
6595874	CC(C)(C)OC(=O)N[C@H]1CC[C@H](O)CC1	0.94
7530805	O=C(O)C=Cc1ccc(O)cc1	0.94
2207381	O=C(O)C=Cc1ccc(O)cc1	0.94
2207383	O=C(O)/C=C/c1ccc(O)cc1	0.94
1942972	COC(=O)Cc1ccc(Cl)cc1	0.94
113843	CC(=O)Nc1cccnc1	0.96
4388594	CC(C)(C)OC(=O)N1CC=CC1	0.96
1863756	CCOC(=O)c1ccc(C)cc1	0.96
19091322	CCOC(=O)c1ccc(C)cc1	0.96
517586	O=C(NC1CCCCC1)NC1CCCCC1	0.97
122812	COc1ccc(C(=O)O)cn1	0.98
9847473	Nc1ncc(Cc2ccc(F)cc2)s1	0.985714
2045104	O=C(O)Cc1cccc(Br)c1	0.99
1848152	OCCC1CCCCC1	0.99
1721160	CCCC(N)C(=O)O	1
1534826	OC1CN(C(c2ccccc2)c2ccccc2)C1	1
8479425	O=C(O)C1CCCN1	1
118454	Nc1nc(Cl)cc(Cl)n1	1
635889	CCC(N)C(=O)O	1
4349564	CC1(C)C2CCC1(C)C(O)C2	1
480022	CC(C)(C)OC(=O)N1CCCCC1C(=O)O	1
3589062	O=C(O)C(O)c1ccccc1	1
2641564	CC(C)OC(=O)c1ccc(O)cc1	1
2093714	OCc1ccccc1C(F)(F)F	1
4658737	O=C(O)C1CCCN1	1
8141867	CC1(C)C2CCC1(C)C(O)C2	1
2113604	O=S(=O)(Cl)c1ccc(C(F)(F)F)cc1	1
106418	Cc1cccnc1C	1
9845043	CCCC(N)C(=O)O	1
119031	Nc1ncccc1C(=O)O	1
1744776	CCCCOC(N)=O	1
102638	CC1CNCC(C)C1	1
116154	c1ccc2c(c1)CCOC2	1
102738	OC1CCNCC1	1
506746	CC1CCC(=O)CC1	1
114292	Cc1cc(C)[nH]c(=O)n1	1
3652038	CC(C)(C)OC(=O)N1CCCCC1C(=O)O	1
142070	O=C1CCCc2[nH]c3ccccc3c21	1
383566	CC1CNCCN1	1
2209841	O=C(O)CCc1ccc(O)cc1	1
120547	Nc1c(Cl)cncc1Cl	1
4781055	CCC(N)C(=O)O	1
607964	Fc1cnc(Cl)nc1Cl	1
1940316	N#Cc1ccc(F)cc1F	1
1639	Cc1c[nH]c(C)n1	1
2042799	O=C(O)CCC1CCCCC1	1
111376	Nc1ncc(Br)cn1	1
741974	ClCC=Cc1ccccc1	1
2613789	Cc1cccc(C(=O)O)c1Br	1
1867917	Oc1ccccc1C(F)(F)F	1
1929337	CC1(C)C(C(=O)O)C1(C)C	1
123692	O=C1Cc2ccccc2CO1	1
20346441	N[C@H](CO)Cc1ccccc1	1
84088	N[C@@H](Cc1c[nH]cn1)C(=O)O	1
113176	c1cc(-c2ccncc2)ccn1	1
80809	O=C(O)C1CCCN1	1
21954917	CC1(C)C2CCC1(C)C(O)C2	1
1569999	c1cc(-c2ccncc2)ccn1	1
1936510	Cc1ccc(C(=O)O)cc1Br	1
4903975	O=C(O)C1CCCN1	1
1936952	Cc1ccccc1CC(=O)O	1
103296	CC1(C)CCCC(C)(C)N1	1
2250655	O=C(O)Cc1ccccc1Br	1
9042926	CCC(N)C(=O)O	1
2043575	CCC(=O)c1cccc(Cl)c1	1
2242512	OCc1cccc(Br)c1	1
5244083	O=C(O)C1CCCN1	1
112939	Brc1cnc2ccccc2c1	1
136781	O=C(O)c1ccc(C(=O)O)s1	1
2208238	N[C@H](CO)Cc1ccccc1	1
2046478	N#Cc1ccc(C(F)(F)F)cc1	1
9256330	O=C(O)C(O)c1ccccc1	1
107910	CC(=O)c1cccs1	1
9858013	CC1(C)C2CCC1(C)C(O)C2	1
18070245	CC1(C)C2CCC1(C)C(O)C2	1
1100453	CCOc1ccccc1O	1
973858	O=C(O)c1c(Cl)cccc1Cl	1
636507	Fc1ccc(CBr)cc1	1
8479424	O=C(O)C1CCCN1	1
149757	CC(=O)N1CSCC1C(=O)O	1
510011	O=C(O)C(O)c1ccccc1	1
4666512	O=C(O)C(O)c1ccccc1	1
11420416	CC1CNCC(C)C1	1
5774	Clc1ncnc2nc[nH]c12	1
1906759	CCC(O)c1ccccc1	1
109671	O=C(O)C1CCCO1	1
957859	c1ccc(-c2ccccn2)nc1	1
5377389	O=C(O)C(O)c1ccccc1	1
2243418	OCc1ccccc1Br	1
9553612	N#Cc1ccc(F)cc1C(F)(F)F	1
1721408	N[C@@H](CS)C(=O)O	1
137242	O=C(O)c1ccncc1C(=O)O	1
6911842	CCC(O)c1ccccc1	1
105699	Oc1cccnc1	1
7110658	CCCC(N)C(=O)O	1
103071	OCC1CCNCC1	1
971266	O=C(O)c1ccccc1Br	1
15602032	CC1(C)C2CCC1(C)C(O)C2	1
5429006	Brc1ccc2[nH]ccc2c1	1
1364327	Cc1ccc(C=CC(=O)O)cc1	1
5733255	O=C(O)C(O)c1ccccc1	1
3588099	O=C(O)C1CCCN1	1
18812970	O=C(O)c1ccc(C(=O)O)s1	1
636131	O=C(O)c1ccccc1	1
2613441	O=C(O)/C=C/c1ccc(F)cc1	1
1955599	NC(=O)c1cccc(C(F)(F)F)c1	1
6052111	CC1(C)C2CCC1(C)C(O)C2	1
11420417	CC1CNCC(C)C1	1
1907970	O=C(O)c1ccc(CCl)cc1	1
2045904	O=C1CCC(c2ccccc2)CC1	1
86198	N[C@H](Cc1c[nH]c2ccccc12)C(=O)O	1
4781094	CC1(C)C2CCC1(C)C(O)C2	1
107035	N#Cc1cccs1	1
908582	c1ccc(-c2ccccn2)nc1	1
15621794	CC1(C)C2CCC1(C)C(O)C2	1
4781112	CCCC(N)C(=O)O	1
2039308	CC1=C(O)C(=O)CC1	1
508510	NC(=O)c1ccccc1Cl	1
146395	CCOC(=O)c1cc2ccccc2[nH]1	1
774152	O=C1CCC(=O)CC1	1
127664	CSc1nc(Cl)cc(Cl)n1	1
9042925	CCC(N)C(=O)O	1
10253241	COC(=O)c1ccc(O)cc1	1
112181	O=C1CCCN1CCO	1
6368067	CCC(O)c1ccccc1	1
112120	O=C(O)Cn1ccnc1	1
3700361	CCOC(=O)C1CCCCN1.Cl	1
1862501	COC(=O)c1ccccc1Br	1
2691571	COc1cc(C#N)ccc1O	1
113089	c1ccc(-c2ccccn2)nc1	1
7291856	CC(C)(C)OC(=O)N1CCC(CO)CC1	1
383595	OCc1cccs1	1
509801	COC(=O)c1ccc(O)cc1	1
4666513	O=C(O)C(O)c1ccccc1	1
5239622	CCC(N)C(=O)O	1
107908	Cc1nccnc1C	1
2690036	CC(C)[C@H]1CC[C@H](C(=O)O)CC1	1
112877	Brc1ccc2[nH]ccc2c1	1
2692710	COC(=O)c1ccc(OC)c(Br)c1	1
148736	O=C1c2ccccc2C(=O)N1CCBr	1.03
127407	Brc1ccc2c(c1)OCO2	1.04
2045329	CCc1ccc(O)c(OC)c1	1.06
2691039	CCOc1ccccc1C(=O)O	1.09
907218	O=C(O)c1cccc(Cl)c1	1.09
178916	O=C(O)C1COc2ccccc2O1	1.1
79882	C[C@H]1CNC[C@@H](C)N1	1.1
2803645	NC(=S)Nc1ccc(F)cc1	1.1
2069240	CCC(N)COC	1.12
8255394	CCC(N)COC	1.12
110056	CC1CN(C)CCC1=O	1.13
7718118	CCC(C)C(N)C(=O)OC.Cl	1.14
4356448	CCC(C)C(N)C(=O)OC.Cl	1.14
1369659	O=C(O)C=Cc1ccc([N+](=O)[O-])cc1	1.14
22339464	CCC(C)C(N)C(=O)OC.Cl	1.14
907309	NC(=S)Nc1ccccc1	1.148
4997403	N#Cc1ccc(CBr)cc1	1.15
636717	N#Cc1ccc(CBr)cc1	1.15
1721796	CC[C@H](C)[C@H](N)C(=O)O	1.16
1732184	CC(C)OCCO	1.16
23042537	C[C@@H](NC(=O)OC(C)(C)C)C(=O)O	1.16
2048396	C[C@@H](NC(=O)OC(C)(C)C)C(=O)O	1.16
20130123	CC[C@H](C)[C@H](N)C(=O)O	1.16
1721792	CC[C@H](C)[C@H](N)C(=O)O	1.16
13197095	CC(NC(=O)OC(C)(C)C)C(=O)O	1.2
5256179	CC(NC(=O)OC(C)(C)C)C(=O)O	1.2
3591960	NC(Cc1c[nH]c2ccccc12)C(=O)O	1.2
119573	Cc1cc(Cl)nnc1Cl	1.2
2438796	O=C(O)c1ccc(Cl)c(Br)c1	1.2
28819625	COc1cc(CN)ccc1O.Cl	1.2
609005	COc1ccc(S(=O)(=O)Cl)cc1	1.2
4686567	NC(Cc1c[nH]c2ccccc12)C(=O)O	1.2
487024	O=C(O)C1CCCCN1C(=O)OCc1ccccc1	1.2
2691094	O=C(O)[C@H](O)c1ccccc1	1.2
129346	Cc1cccc2sc(N)nc12	1.2
909640	N#CCc1cccc(C(F)(F)F)c1	1.2
142023	COC(=O)c1c[nH]c2ccccc12	1.2
775955	O=C(O)Cc1ccccc1F	1.2
6131557	CC(NC(=O)OC(C)(C)C)C(=O)O	1.2
3650236	CC(C)(C)OC(=O)N1CCC(=O)CC1	1.2
1858941	N#Cc1cccc(F)c1	1.2
109351	c1ccc2nccnc2c1	1.2
971589	Cc1ccc(C(=O)O)c(C)c1	1.2
2613992	COC(=O)Cc1ccc(Br)cc1	1.2
518285	COc1ccc(C(=O)O)cc1OC	1.2
1107601	Cc1cc(C)c(S(=O)(=O)Cl)c(C)c1	1.2
6131731	NC(Cc1ccc(O)cc1)C(=O)O	1.2
1936535	Cc1cc(C(=O)O)ccc1Cl	1.2
957426	c1ccc2nccnc2c1	1.2
956625	O=C(O)C(F)(F)Cl	1.2
2041344	CC(=O)c1ccccc1F	1.2
2208140	Cc1ccc(C(=O)O)c(O)c1	1.2
5775455	CCOC(=O)[C@H](N)c1ccccc1.Cl	1.2
2614004	COc1cccc(CC(=O)O)c1	1.2
29116218	NC(Cc1c[nH]c2ccccc12)C(=O)O	1.2
781213	COc1ccc(C(C)=O)cc1OC	1.2
2087648	N#Cc1ccc(C(=O)CBr)cc1	1.2
3542667	CC(C)(C)OC(=O)N1CCC[C@H]1CO	1.2
1867272	COC(=O)c1ccc(CBr)cc1	1.2
2207378	O=C(O)/C=C/c1cccc(Cl)c1	1.2
110735	Cc1cc(C)nc(N)n1	1.2
1862361	N#CCc1ccccc1F	1.2
119481	O=c1[nH]c2ccccc2o1	1.2
115847	O=C(O)c1cncc(O)c1	1.2
1931620	OCc1ccc(Br)cc1	1.2
4292947	CC(NC(=O)OC(C)(C)C)C(=O)O	1.2
1862566	N#Cc1cccc(C(=O)O)c1	1.2
9193185	CC(NC(=O)OC(C)(C)C)C(=O)O	1.2
2042185	N#Cc1ccccc1Br	1.2
4675159	NC(Cc1ccc(O)cc1)C(=O)O	1.2
4675158	NC(Cc1ccc(O)cc1)C(=O)O	1.2
5240114	CC(C)C(Br)C(=O)O	1.2
2832300	CC(=O)Nc1ccc(F)cc1F	1.2
1721721	CC(C)C[C@@H](N)C(=O)O	1.2
8259543	NC(Cc1ccc(O)cc1)C(=O)O	1.2
1910422	COc1cccc(OC)c1OC	1.2
973353	O=C(O)c1cc(Cl)ccc1Cl	1.2
1721143	CC(C)C(Br)C(=O)O	1.2
2043528	Cc1ccc(CC(=O)O)cc1	1.2
1929215	O=C(O)CCC1CCCC1	1.2
1072882	CNc1ccc2nc(C)sc2c1	1.2
3591959	NC(Cc1c[nH]c2ccccc12)C(=O)O	1.2
489608	NC(Cc1c[nH]c2ccccc12)C(=O)O	1.2
2049241	O=C(O)c1ccc(C(F)(F)F)cc1	1.2
6481877	NC(Cc1c[nH]c2ccccc12)C(=O)O	1.2
1953781	O=C(O)Cc1ccc(Cl)c(Cl)c1	1.2
118669	Cc1cnc(Cl)nc1Cl	1.2
2042575	Cc1ccc(/C=C/C(=O)O)cc1	1.2
2082206	N#Cc1cc(F)cc(F)c1	1.2
507957	O=C1CCc2ccccc21	1.2
1103973	CC(NC(=O)OC(C)(C)C)C(=O)O	1.2
86196	NC(Cc1c[nH]c2ccccc12)C(=O)O	1.2
8630624	NC(Cc1ccc(O)cc1)C(=O)O	1.2
2613791	Cc1c(O)cccc1C(=O)O	1.2
1909986	CC(C)(C)OC(=O)NCCC(=O)O	1.2
107796	O=C1CNCCN1	1.2
116525	Nc1nc2ccccc2[nH]1	1.2
14543721	CC(C)C[C@@H](N)C(=O)O	1.2
4231143	N#Cc1ccc(Br)cc1F	1.2
1101012	N#CCc1cccc2ccccc12	1.2
23792438	CCOC(=O)[C@H](N)c1ccccc1.Cl	1.2
515881	NC(Cc1ccc(O)cc1)C(=O)O	1.2
3915418	COc1cc(CN)ccc1O.Cl	1.2
7584831	N#Cc1ccc(C(=O)CBr)cc1	1.2
4868026	COc1cccc(OC)c1OC	1.2
110911	Clc1ccnc(Cl)n1	1.2
2209125	O=C(O)c1ccc(Cl)cc1O	1.2
2082224	N#Cc1ccc(F)c(F)c1	1.2
105107	ClCCCN1CCOCC1	1.24
4292559	N[C@H]1c2ccccc2C[C@H]1O	1.26
3198354	N[C@H]1c2ccccc2C[C@H]1O	1.26
129738	O=C(O)CSc1ccncc1	1.28
1968716	O=C(O)c1ccc(F)c(C(F)(F)F)c1	1.32
1857538	COCCc1ccccc1	1.32
3677061	Cl.ClCCN1CCCC1	1.32
32696710	Cl.ClCCN1CCCC1	1.32
27593252	CNCC(=O)OC.Cl	1.36
3619268	CNCC(=O)OC.Cl	1.36
2208365	COc1ccc(C(=O)O)cc1O	1.36
9757879	FC(F)(F)c1ncccc1Cl	1.38
119866	O=c1[nH]c2ccccc2[nH]1	1.38
3236443	Oc1ccc(F)c(Cl)c1	1.38
1908896	O=C(O)c1cccc2ccccc12	1.39
4746332	O=C(O)c1cccc2ccccc12	1.39
111928	c1ccc2c(c1)CCO2	1.4
2079486	OCc1ccccc1F	1.4
150964	Oc1ccc(N2CCNCC2)cc1	1.4
153862	Cn1c2c(c3ccccc31)C(=O)CCC2	1.4
27523390	OC1c2ccccc2CC1Br	1.4
10273666	COC(=O)C(C)N.Cl	1.4
2353995	CC(C)(C)OC(=O)NCCO	1.4
5734971	CC(Oc1ccccc1)C(=O)O	1.4
2076023	CCCC1CCC(=O)CC1	1.4
131640	O=C(O)c1cncc(C(=O)O)c1	1.4
22996726	COC(=O)[C@@H]1CCCN1.Cl	1.4
2091633	O=S(=O)(Cl)c1ccc(F)cc1	1.4
4915792	COC(=O)C(C)N.Cl	1.4
1907764	N#CCc1ccc(F)cc1	1.4
1340552	OCC1(CO)CC1	1.4
146118	OC1CCN(Cc2ccccc2)CC1	1.4
118361	O=C(O)c1ccc(Cl)s1	1.4
2803083	CC(=O)NC1CCC(=O)CC1	1.4
8198509	N#Cc1ccc(F)c(Br)c1	1.4
508838	COc1cccc(C(=O)O)c1	1.4
9861636	COC(=O)C(C)N.Cl	1.4
781309	Cc1cccc(C)c1NC(=O)CCl	1.4
973358	O=C(O)c1ccc(Cl)cc1F	1.4
6780810	COC(=O)C(C)N.Cl	1.4
1104346	CC(C)(C)c1ccc(S(=O)(=O)Cl)cc1	1.4
22727496	COC(=O)[C@@H]1CCCN1.Cl	1.4
1099645	Cc1ccc(CC#N)cc1	1.4
1210029	N#Cc1ccccc1O	1.4
102976	OCCN1CCCC1	1.4
6132160	CC(C)(C)OC(=O)NC(C(=O)O)c1ccccc1	1.4
103713	CN1CCCC(CO)C1	1.4
1209894	Cc1csc(C(C)C)n1	1.4
1722669	COC(=O)CCC(=O)O	1.4
128582	COC(=O)c1cc(Cl)ccn1	1.4
3596045	COC(=O)[C@@H]1CCCN1.Cl	1.4
529873	CC(C)(C)OC(=O)NC(C(=O)O)c1ccccc1	1.4
3592362	CC(C)(C)OC(=O)N[C@H](C(=O)O)c1ccccc1	1.4
10646	Oc1ccccc1N1CCNCC1	1.4
638991	O=[N+]([O-])c1ccccc1CBr	1.4
113857	Cc1ccc(C(=O)O)s1	1.4
3619264	COC(=O)C(C)N.Cl	1.4
11519419	O=C(O)C1CCCCN1	1.4
14560712	CC(C)(C)OC(=O)NCCO	1.4
4660401	O=C(O)C1CCCCN1	1.4
1940597	N#Cc1ccc(F)cc1Br	1.4
2047548	CC(Oc1ccccc1)C(=O)O	1.4
27038001	COC(=O)C(C)N.Cl	1.4
147774	O=C(O)c1nc[nH]c1C(=O)O	1.4
2041792	O=C(O)c1cccc(Br)c1	1.4
81095	O=C(O)C1CCCCN1	1.4
2441884	COc1ccc(OC)c(Br)c1	1.4
2042063	COc1cccc(CO)c1	1.4
1448652	OCc1ccc(Cl)cc1Cl	1.4
222773	c1ccc(C(c2ccccc2)N2CCNCC2)cc1	1.4
2209714	COc1ccccc1/C=C/C(=O)O	1.4
472264	Nc1ncc(Cl)cc1Br	1.4
1948618	COC(=O)c1c(F)cccc1F	1.4
2041501	OCc1cccc(Cl)c1	1.4
31856970	CN1CCCC(CO)C1	1.4
4964740	CC(C)(C)c1cc(N)[nH]n1	1.4
1210310	CCC(=O)c1ccc(F)cc1	1.4
606047	Cc1cc(N)[nH]n1	1.4
2614292	O=C(O)c1ccc(F)cc1Br	1.4
2325863	NC(=O)c1ccccc1F	1.4
2970567	N#Cc1ccc(NCC(=O)O)cc1	1.4
956637	CC(=O)c1cccc(C)c1	1.4
150206	O=C(O)c1ccc2c(c1)OCO2	1.4
640151	CC(=O)c1cccc(C(F)(F)F)c1	1.4
115992	Nc1ccc(C(=O)O)cn1	1.4
112288	Cc1cncc(C(=O)O)c1	1.4
4784785	CC(C)(C)OC(=O)NC(C(=O)O)c1ccccc1	1.4
125780	CCOC(=O)N1CCNCC1	1.4
1448000	O=C1CCc2cc(Cl)ccc21	1.4
111915	c1ccc2c(c1)CCN2	1.4
2045103	O=C(O)Cc1cccc(Cl)c1	1.4
5734972	CC(Oc1ccccc1)C(=O)O	1.4
119028	O=C(O)c1cccnc1O	1.4
3240714	COc1ccc(Br)cc1F	1.4
5533442	CC(C)(C)OC(=O)N1CCC(C(=O)O)CC1	1.4
115851	O=C(O)c1cc(Cl)ccn1	1.4
9326153	COc1cccc(CO)c1	1.4
10153658	O=C(O)c1cc(F)cc(Br)c1	1.4
112553	O=C(O)C1CCNCC1	1.4
108735	Nc1ccc(Cl)cn1	1.4
2046877	OC1c2ccccc2CC1Br	1.4
2084230	O=C(O)/C=C/c1cccc(Br)c1	1.4
120959	O=c1[nH]ncc(Cl)c1Cl	1.4
107751	CC(=O)c1cccnc1	1.4
2207134	COc1ccccc1C#N	1.4
11227852	OC1c2ccccc2CC1Br	1.4
2935417	C#Cc1cccc(N)c1	1.4
19522594	OC1c2ccccc2CC1Br	1.4
110918	Nc1ccc(Cl)nn1	1.4
636550	O=C1Cc2ccccc2C1	1.4
4784786	CC(C)(C)OC(=O)NC(C(=O)O)c1ccccc1	1.4
1911082	COC(=O)c1ccc(C(=O)O)cc1	1.4
1934470	N#CCc1ccc(O)cc1	1.4
9201483	CC(C)(C)OC(=O)NC(C(=O)O)c1ccccc1	1.4
4740501	N#Cc1ccc(F)c(Cl)c1	1.4
1902292	CC(C)[C@H]1CC[C@H](C)C[C@@H]1O	1.4
1742147	CC(C)(C)C(N)=O	1.4
31213383	OC12CC3CC(CC(C3)C1)C2	1.44
1857374	Cc1cccc(C(N)=O)c1	1.44
108506	Cc1ccnc(N)n1	1.44
1903952	OC12CC3CC(CC(C3)C1)C2	1.44
4655787	OC12CC3CC(CC(C3)C1)C2	1.44
1909076	Cc1ccc(O)c(C(=O)O)c1	1.48
1100448	COc1ccccc1CN	1.48
2115995	O=C(OCc1ccccc1)c1ccc(O)cc1	1.48
102717	BrCC1CCCO1	1.5
880578	O=C(C1CCCO1)N1CCNCC1	1.5
2091691	CC(=O)Nc1cccc(Cl)c1C	1.52
2689722	CCNc1ccccc1C	1.52
11456621	OC1CC2CCC(C1)N2	1.53
11451725	OC1CC2CCC(C1)N2	1.53
104236	OC1CC2CCC(C1)N2	1.53
1363564	CC(C)c1ccc(O)cc1	1.54
2698317	Cc1ccc(S(=O)(=O)NC2CCCCC2)cc1	1.56
1072826	Cc1c(Cl)cccc1C(=O)O	1.6
4240279	COC(=O)[C@H](N)Cc1c[nH]c2ccccc12.Cl	1.6
8907356	CC(C)C(NC(=O)OC(C)(C)C)C(=O)O	1.6
14198887	CC(C)(C)OC(=O)NC(C)(C)C(=O)O	1.6
1099115	Cc1cc(=O)[nH]o1	1.6
973351	O=C(O)c1cc(F)ccc1F	1.6
2575978	O=C(O)c1cc(F)ccc1Br	1.6
22916987	COC(=O)[C@H](N)Cc1c[nH]c2ccccc12.Cl	1.6
2251315	Cc1ccc(C(C)C(=O)O)cc1	1.6
2574799	O=C(O)c1ccc(F)c(Cl)c1	1.6
1099397	CCc1ccccc1O	1.6
108534	Cc1n[nH]c(C)c1Br	1.6
976984	O=C(O)c1ccccc1C(F)(F)F	1.6
106951	CCCc1ncc[nH]1	1.6
2210999	NC(C(=O)O)c1ccc(Cl)cc1	1.6
6323931	O=C(O)c1ccc(Br)cc1F	1.6
643664	CC(NC(=O)c1ccccc1)C(=O)O	1.6
112408	c1ccc2nsnc2c1	1.6
131162	C=C1N(C)c2ccccc2C1(C)C	1.6
8984732	CC(O)C(N)C(=O)O	1.6
1900934	CC1(O)CCCCC1	1.6
2802443	CNc1ccccc1F	1.6
1946217	O=C(O)c1cccc(Cl)c1Cl	1.6
29300873	COc1ccc(N)cn1	1.6
3587731	CC(O)C(N)C(=O)O	1.6
3611482	O=C(O)Cc1ccc2ccccc2c1	1.6
2210858	COc1cccc(C(=O)O)c1OC	1.6
1748597	CCOC(=O)C(F)F	1.6
2111078	Cc1ccc(C(=O)c2ccccc2C(=O)O)cc1	1.6
1940741	CC(=O)c1ccc(F)cc1F	1.6
110494	CC1CCCCN1CCC#N	1.6
2091647	COc1ccc(CN)c(OC)c1	1.6
2365489	CC(C)(C)c1ccc(S(N)(=O)=O)cc1	1.6
115155	COc1ccc(N)cn1	1.6
8131265	O=C(O)C=Cc1ccco1	1.6
8053561	O=S(=O)(Cl)c1cc(F)cc(F)c1	1.6
1953219	O=C(O)Cc1cccc(Cl)c1Cl	1.6
1721403	N[C@H](CO)C(=O)O	1.6
6391566	CC(=O)c1cccc(Cl)c1	1.6
1940680	O=C(O)c1cc(F)cc(F)c1	1.6
1963372	O=C(O)C=Cc1cccc(C(F)(F)F)c1	1.6
2208389	COc1ccc2c(c1)C(=O)CCC2	1.6
1106741	CC(C)C(NC(=O)OC(C)(C)C)C(=O)O	1.6
2047423	COc1ccc(OC)c(C(C)=O)c1	1.6
1861071	N#CCc1cccc(F)c1	1.6
973396	O=C(O)Cc1ccc2ccccc2c1	1.6
118284	Clc1cc(Cl)nc(Cl)n1	1.6
908000	O=C(O)Cc1ccccc1O	1.6
383776	O=c1[nH]c(=O)c2ccccc2[nH]1	1.6
1859122	Cc1cc(O)ccc1Br	1.6
1866980	COC(=O)c1ccc(C#N)cc1	1.6
119376	Nc1ncc(Cl)cc1Cl	1.6
107077	Cc1ccc(O)cn1	1.6
180544	COC(=O)C1CCN(Cc2ccccc2)CC1	1.6
2211201	O=C(O)/C=C/c1cccc([N+](=O)[O-])c1	1.6
1906923	O=C(O)c1ccc(Br)cc1	1.6
7993078	COC(=O)c1ccc(C#N)cc1	1.6
2504993	O=C(O)/C=C/c1cccc(C(F)(F)F)c1	1.6
3033982	CC(C)(C)OC(=O)N[C@@H](C(=O)O)c1ccccc1	1.6
2614286	O=C(O)c1cc(Cl)ccc1F	1.6
637114	O=C(O)c1cccc(CCl)c1	1.6
122328	CCOC(=O)C1CCCCN1C	1.6
1365308	O=C(O)C=Cc1ccc(Cl)cc1	1.6
1940332	N#Cc1c(F)cccc1Cl	1.6
2691432	O=C(O)c1cc(Br)ccc1Cl	1.6
4741066	N#Cc1ccc(O)cc1F	1.6
1952744	O=C(O)Cc1c(Cl)cccc1Cl	1.6
973857	O=C(O)c1c(F)cccc1Cl	1.6
906818	NCCCC(=O)O	1.6
636318	CC(=O)c1cccc(Cl)c1	1.6
2693561	O=C(O)c1cc(O)cc(C(=O)O)c1	1.6
636502	OCc1ccc(Cl)cc1	1.6
1365198	O=C(O)C=Cc1ccccc1Cl	1.6
508117	COc1ccc(C#N)cc1	1.6
4232394	CC(C)C(NC(=O)OC(C)(C)C)C(=O)O	1.6
6131755	CC(C)C(NC(=O)OC(C)(C)C)C(=O)O	1.6
7526460	N#Cc1cc(Cl)ccc1F	1.6
1953772	CC(C)(C)OC(=O)NC(C)(C)C(=O)O	1.6
7636202	O=C(O)c1c(F)cc(Br)cc1F	1.6
1755933	CC(C)(C)OC(=O)CC#N	1.6
107890	Cc1csc(N)n1	1.6
1098902	CC(O)C(N)C(=O)O	1.6
2206856	CC(=O)c1ccc(F)c(F)c1	1.6
2046827	CN(CC(=O)O)C(=O)OC(C)(C)C	1.6
79877	OCC1CCCCN1	1.6
20316645	CC(O)C(N)C(=O)O	1.6
9196510	CC(C)C(NC(=O)OC(C)(C)C)C(=O)O	1.6
31897116	NCCCC(=O)O	1.6
640967	CCOC(=O)N1CCC(=O)CC1	1.6
2329	CN1C2CCC1CC(=O)C2	1.6
2045292	N#Cc1c(F)cccc1F	1.6
107792	Cc1ccncc1N	1.6
2213223	O=C(O)Cc1cccc(C(F)(F)F)c1	1.6
1859744	NC(=O)c1ccc(F)cc1	1.6
2041846	COC(=O)c1ccccc1C	1.6
4979166	COC(=O)N[C@H](C(=O)O)C(C)C	1.6
129244	Cc1cc(O)c(C(=O)O)cn1	1.6
2044018	O=C(O)/C=C/c1cccc(F)c1	1.6
116148	c1cnc2c(c1)CCCC2	1.6
2691656	O=S(=O)(Cl)c1cccc(Br)c1	1.64
8051409	CNC(=O)c1cc(Cl)ccn1	1.65
1906921	NC(=O)c1ccc(O)cc1	1.65
2245604	CC[C@H]1CC[C@H](C(=O)O)CC1	1.68
11237977	NC(CO)c1ccccc1	1.68
125260	O=C1CCc2ccccc2N1	1.68
2097922	CN(C)C(=O)Nc1ccc(Cl)cc1	1.68
971219	NC(CO)c1ccccc1	1.68
11417545	NC(CO)c1ccccc1	1.68
4661750	NC(CO)c1ccccc1	1.68
1422249	Cc1cccc(=O)[nH]1	1.68
3250459	CC(=O)Nc1ccc(Br)cc1F	1.68
1866785	O=C(CCCl)c1ccc(F)cc1	1.72
114005	O=C(O)Cc1cccnc1	1.72
620754	Fc1ccc(C(c2ccc(F)cc2)N2CCNCC2)cc1	1.72
20545982	CC1(C)[C@H]2CC[C@]1(C)[C@H](O)C2	1.76
2090441	O=C(O)c1ccc(Br)cc1Cl	1.76
3194412	CC1(C)[C@H]2CC[C@]1(C)[C@H](O)C2	1.76
80825	O=C(O)c1ccc[nH]1	1.76
7280653	CC1(C)[C@H]2CC[C@]1(C)[C@H](O)C2	1.76
148331	O=C(O)c1cc(O)nc2ccccc12	1.76
2038053	CC1(C)[C@H]2CC[C@]1(C)[C@H](O)C2	1.76
1239156	COc1cc(O)cc(OC)c1	1.78
1446930	OCc1ccc(F)cc1	1.78
111149	COC(=O)c1ccc[nH]1	1.79
119370	Clc1nsc2ccccc12	1.8
3647995	C[C@H]1CNCCN1	1.8
123259	CCOC(=O)C1CCCN(C)C1	1.8
1740634	CNC(=O)CCl	1.8
3654427	CCOC(=O)C(C)N.Cl	1.8
110853	CC(=O)c1ccc(C)o1	1.8
2502313	Cc1ccc(C)c(CC(=O)O)c1	1.8
878182	C[C@H]1CNC[C@@H](C)O1	1.8
2081085	Oc1ccc(F)c(F)c1	1.8
3654426	CCOC(=O)C(C)N.Cl	1.8
1929783	Cc1ccccc1CO	1.8
2614808	N#CCc1ccc(F)cc1F	1.8
1867593	COc1ccc(Br)c(OC)c1	1.8
6323034	N#Cc1ccc(F)cc1Cl	1.8
2044384	CC(C)OC(=O)c1ccccc1	1.8
28302492	CCOC(=O)C(C)N.Cl	1.8
159169	O=C(OCc1ccccc1)c1cccnc1	1.8
177739	O=C(O)Cc1ccc2c(c1)OCO2	1.8
1388006	O=C(O)Cc1ccc2c(c1)OCO2	1.8
80957	CC1(C)COC(=O)[C@@H]1O	1.8
1865539	COc1cccc(CC#N)c1	1.8
5931991	c1ccc2c(c1)OCCO2	1.8
2041236	C[C@H]1CC[C@H](C(=O)O)CC1	1.8
7634124	CCc1ncnc(Cl)c1F	1.8
1526788	O=C1Cc2ccc(Cl)cc2N1	1.8
2212190	COc1cccc(OC)c1C(=O)O	1.8
115982	Clc1nc2ccccc2o1	1.8
1099644	Cc1cccc(CC#N)c1	1.8
1956293	COC(=O)Cc1cccc2ccccc12	1.8
2697078	NS(=O)(=O)c1ccccc1C(F)(F)F	1.8
116000	Cc1oncc1C(=O)O	1.8
3654425	CCOC(=O)C(C)N.Cl	1.8
120846	c1ccc2c(c1)OCCO2	1.8
1954820	Cc1cc(C(=O)O)cc(C(=O)O)c1	1.8
116005	Cc1cnc(C(=O)O)cn1	1.8
975871	O=C(O)/C=C/c1ccccc1[N+](=O)[O-]	1.8
112896	NC(=O)C1CCCNC1	1.8
2442163	N#CCOc1ccc(Cl)cc1	1.8
5426662	CCOC(=O)c1ccc(F)cc1F	1.8
2438795	O=C(O)c1ccc(F)c(Br)c1	1.8
514493	CS(=O)(=O)c1ccc(C(=O)O)cc1	1.8
140666	Cc1cc(N)n(-c2ccccc2)n1	1.8
742612	Cc1nc2ccccc2nc1O	1.84
6475228	CC(=O)NC(C)C(=O)O	1.84
774333	CC(=O)NC(C)C(=O)O	1.84
28737562	Cl.Clc1ccccc1N1CCNCC1	1.84
912523	N#CCCn1ccnc1-c1ccccc1	1.84
5251577	COC(=O)c1ccc(C)c(Br)c1	1.84
5652889	Cl.Clc1ccccc1N1CCNCC1	1.84
10588386	Cl.Clc1ccccc1N1CCNCC1	1.84
6475227	CC(=O)NC(C)C(=O)O	1.84
2259035	CC(=O)c1ccccc1C(F)(F)F	1.88
1882	CC(=O)c1ccc[nH]1	1.92
3703352	Cl.ClCc1nc2ccccc2[nH]1	1.96
5884834	Cl.ClCc1nc2ccccc2[nH]1	1.96
30435222	NCC1CCC(C(F)(F)F)CC1	1.97143
13905585	NCC1CCC(C(F)(F)F)CC1	1.97143
158031	COC(=O)Cc1c[nH]c2ccccc12	1.99
2613602	CCOc1ccc(C#N)cc1	2
1862865	N#Cc1ccc(C(=O)O)cc1	2
9866718	COC(=O)C(N)CC(C)C.Cl	2
2331311	Cc1ccc(S(=O)(=O)CC(=O)O)cc1	2
1872069	O=C(O)Cc1ccccc1C(=O)O	2
129366	CC(=O)N1CCc2ccccc21	2
1761413	CCOC(=O)C(F)(F)Cl	2
972383	Cc1cccc(C(=O)O)c1Cl	2
3913185	Cl.NCc1cccc(Br)c1	2
3691728	Br.Cc1ccc(=O)[nH]n1	2
111887	CC(=O)c1cccn1C	2
4659917	CNC(C)c1ccccc1	2
5523317	COC(=O)C(Br)c1ccccc1Cl	2
2091539	O=C(CCl)Nc1cccc(F)c1	2
2575499	COC(=O)c1ccc(CO)cc1	2
523308	O=C(O)c1ccc(-c2ccc(C(=O)O)cc2)cc1	2
1860057	OCCSc1ccccc1	2
4659918	CNC(C)c1ccccc1	2
10064515	CCOC(=O)c1ccc(F)c(F)c1	2
3261529	Cc1c(Cl)cccc1S(=O)(=O)Cl	2
1860187	NC(=O)c1cccc(Br)c1	2
114431	Brc1cncc2ccccc12	2
4237208	COC(=O)C(N)CC(C)C.Cl	2
4237207	COC(=O)C(N)CC(C)C.Cl	2
110445	c1ccc(-c2ccccn2)cc1	2
4009582	Cl.NC(=O)c1[nH]cnc1N	2
1450161	OCc1cccc(C(F)(F)F)c1	2
127646	CN(CCO)c1ccccn1	2
2103978	Cc1cccc(C(=O)NCC(=O)O)c1	2
5245232	CNC(C)c1ccccc1	2
15585152	Cl.NC(=O)c1[nH]cnc1N	2
1970911	O=S(=O)(c1ccc(F)cc1)c1ccc(F)cc1	2
130711	O=S(=O)(Cl)c1ccc(Br)s1	2
9327730	COc1ccccc1CO	2
169843	CC(=O)CCc1ccc2c(c1)OCO2	2
2043673	COc1ccccc1CO	2
2643541	Cc1ccc(F)cc1S(=O)(=O)Cl	2
2208090	CC(=O)Nc1ccc(F)cc1	2
2692715	COc1cccc(C(N)=O)c1OC	2
10246492	Cc1ccc(S(=O)(=O)Cl)cc1F	2
1931242	CNC(C)c1ccccc1	2
4670851	Cc1cc(O)[nH]c(=O)c1C#N	2
2516651	Cc1cccc(C)c1C(C)O	2
136113	OCc1ccc2c(c1)OCO2	2
2326352	N#Cc1ccc(Cl)c(Cl)c1	2
32083656	OCCSc1ccccc1	2
103058	OCC1CCCNC1	2
507886	NC(=O)Cc1ccccc1	2
2053625	O=C(O)c1ccccc1-c1ccccc1C(=O)O	2
10531112	OCCSc1ccccc1	2
2259128	O=C(O)COc1ccc(F)cc1	2
2092526	COc1cc(Cl)ccc1C(=O)O	2
5245233	CNC(C)c1ccccc1	2
4392633	CCOC(=O)N1CCC(O)CC1	2
145587	COc1ccc2[nH]cc(CCN)c2c1	2
112053	O=C(O)C=Cc1cccs1	2
6138214	CC1CN(C(=O)OC(C)(C)C)CCN1	2.03
109667	c1cnc2[nH]ccc2c1	2.04
4307017	OCCc1ccccc1F	2.04
7423296	N#CCc1c(F)cccc1Cl	2.08
114866	Cc1nc2ccccc2cc1O	2.08
636684	COc1cccc(CCl)c1	2.12
1103862	CC(C)c1ccc(S(=O)(=O)Cl)cc1	2.12
605871	CCOC(=O)CC#N	2.12
7703957	N#Cc1cc(F)cc(C(F)(F)F)c1	2.12
3587640	NC(CO)C(=O)O	2.16
6060578	CC(C)(C)OC(=O)N1CCC[C@@H]1C(N)=O	2.16
13179721	NC(CO)C(=O)O	2.16
8309496	NC(CO)C(=O)O	2.16
6130745	NC(CO)C(=O)O	2.16
516277	O=C(O)Cc1noc2ccccc12	2.16
1721402	NC(CO)C(=O)O	2.16
3627058	Cl.NCCc1ccc(O)cc1	2.2
3559469	Cl.O=C1CCNCC1	2.2
122040	Cc1ccc2nc(N)sc2c1	2.2
114297	Cc1cc(Cl)nc(N)n1	2.2
2327706	COC(=O)c1cccc(C#N)c1	2.2
79763	CC1CO1	2.2
108110	Cc1cc(N)no1	2.2
8309796	OCc1ccc(F)cc1Br	2.2
1721790	CCC(C)C(N)C(=O)O	2.2
6354	O=C(O)c1n[nH]c2ccccc12	2.2
5241193	CCC(C)C(N)C(=O)O	2.2
1866322	CS(=O)(=O)c1ccc(O)cc1	2.2
84089	N[C@H](Cc1c[nH]cn1)C(=O)O	2.2
125356	Oc1ccnc2cc(Cl)ccc12	2.2
639749	CC(=O)Nc1ccc(C(C)=O)cc1	2.2
2207384	O=C(O)/C=C/c1ccc(Br)cc1	2.2
6051628	CC1CO1	2.2
1859981	NC(=O)c1ccc(Br)cc1	2.2
1741606	CCC=C(C)C(=O)O	2.2
20316644	CCC(C)C(N)C(=O)O	2.2
20597850	Cl.O=C1CCNCC1	2.2
31600800	Cl.NCCc1ccc(O)cc1	2.2
28220025	CCC(C)C(N)C(=O)O	2.2
1870255	N#CC1CCCc2ccccc21	2.2
1875862	CNC(=O)Oc1cccc2ccccc12	2.2
114571	c1ccc(Cn2ccnc2)cc1	2.2
1994	O=C(O)c1ccsc1	2.2
131697	O=C(O)c1ccc(C(=O)O)nc1	2.2
20368482	CCC(C)C(N)C(=O)O	2.2
5241194	CCC(C)C(N)C(=O)O	2.2
11237970	CC(C)CC(N)CO	2.28
8984958	O=C(OCc1ccccc1)N1CCC(CO)CC1	2.28
11481501	COC(=O)C(N)Cc1c[nH]c2ccccc12.Cl	2.28
4240280	COC(=O)C(N)Cc1c[nH]c2ccccc12.Cl	2.28
4035732	COC(=O)C(N)Cc1c[nH]c2ccccc12.Cl	2.28
19679303	COC(=O)C(N)Cc1c[nH]c2ccccc12.Cl	2.28
1943217	O=C(CCl)c1ccc(F)cc1F	2.28
4405047	CC(C)(C)OC(=O)N1CCC(N)CC1	2.28
110336	Cc1ccc2ncccc2c1	2.28
1719239	CC(C)CC(N)CO	2.28
1911728	O=C(O)C1c2ccccc2-c2ccccc21	2.28
2086506	O=C(O)Cc1cccc(O)c1	2.32
1753006	CC(C)(C)OC(=O)CCl	2.32
115843	Nc1cccc(C(=O)O)n1	2.34
2249815	Cc1cc(Cl)ccc1C(=O)O	2.36
27806799	NC1CCCCC1N	2.4
1460039	O=C(c1ccccc1)c1ccncc1	2.4
10341088	CC(C)(C)OC(=O)NC1CCC(O)CC1	2.4
3864	O=C(c1ccccc1)c1ccncc1	2.4
1721161	CCC[C@@H](N)C(=O)O	2.4
1102465	NCc1cccc(C(F)(F)F)c1	2.4
11135637	CC(C)(C)OC(=O)N1CC(=O)C1	2.4
3563173	Cl.NCC(=O)c1ccccc1	2.4
7290285	CC(C)(C)OC(=O)N1CCOCC1	2.4
119500	O=C1CC2(CCCCC2)CN1	2.4
638281	CS(=O)(=O)c1ccc(Cl)cc1	2.4
2206673	CCC(=O)c1ccc(CC)cc1	2.4
116738	N#Cc1ccc2[nH]ccc2c1	2.4
8626162	NC1CCCCC1N	2.4
5430078	N#Cc1ccc2[nH]ccc2c1	2.4
21130225	NC1CCCCC1N	2.4
9490449	NC1CCCCC1N	2.4
9129781	NC1CCCCC1N	2.4
3193810	O[C@@H]1CCCC[C@H]1O	2.4
83200	CC(=O)N1CCC[C@H]1C(=O)O	2.4
29144204	Cl.NCC(=O)c1ccccc1	2.4
8769641	O[C@@H]1CCCC[C@H]1O	2.4
2965250	NC(=O)c1cccc(F)c1F	2.4
506142	NC1CCCCC1N	2.4
23317069	NC1CCCCC1N	2.4
20362028	CC(C)(C)OC(=O)NC1CCC(O)CC1	2.4
2267687	O=C(O)Cc1ccc(C(F)(F)F)cc1	2.4
2207686	CC(=O)N(C)c1ccccc1	2.4
11425336	CC(C)(C)OC(=O)NC1CCC(O)CC1	2.4
2961797	CC(C)(C)c1ccc(CN)cc1	2.4
1104546	O=C(O)COc1ccc(Br)cc1	2.4
11439250	CC(C)(C)OC(=O)NC1CCC(O)CC1	2.4
5929290	COc1cc[nH]c(=O)c1C#N	2.4
1901343	O[C@@H]1CCCC[C@H]1O	2.4
15616457	NC1CCCCC1N	2.4
2048766	COC(=O)c1ccccc1C(=O)O	2.4
12156257	CC(C)(C)OC(=O)NC1CCC(O)CC1	2.4
10774484	NC1CCCCC1N	2.4
28792964	NC1CCCCC1N	2.4
2832246	NS(=O)(=O)c1ccc(F)cc1	2.4
15650899	CC(C)(C)OC(=O)NC1CCC(O)CC1	2.4
117453	CN1CCN(CCC#N)CC1	2.44
112071	Brc1cnc(Br)s1	2.48
636348	N#CCCc1ccccc1	2.5
102998	OCC1CCCCO1	2.5
103068	NCC1CCOCC1	2.56
774100	O=C1CCCCC1Cl	2.6
3588451	CC12CCC(C1)C(C)(C)C2=O	2.6
118422	COC(=O)C1CCN(C)CC1	2.6
4802506	O=S(=O)(Cl)c1ccc(F)c(F)c1	2.6
1861492	CC12CCC(C1)C(C)(C)C2=O	2.6
1766072	CCOC(=O)CNC(C)=O	2.6
4177620	NC(=O)c1cc(F)cc(F)c1	2.6
126076	Clc1nc2ccccc2nc1Cl	2.6
969804	CC1CCCC(=O)C1	2.6
742355	N#Cc1cccc(CCl)c1	2.6
957976	Clc1ccc(N2CCCC2)nn1	2.6
2084339	O=C(O)/C=C/c1ccccc1Br	2.6
2098929	NC(=O)c1ccc(C(F)(F)F)cc1	2.6
389577	CC(=O)N1CCC(C(=O)O)CC1	2.6
2369410	O=S(=O)(Cl)c1cc(Cl)ccc1Cl	2.6
3088729	Cc1ccc(C#N)c(Br)c1	2.6
3588452	CC12CCC(C1)C(C)(C)C2=O	2.6
160785	O=C1Cc2ccccc2-c2ccccc2N1	2.64
972386	Cc1ccc(C(=O)O)c(Br)c1	2.64
605945	Brc1ncccn1	2.64
1098495	O=C(O)CCCl	2.7
6188879	O=C(O)CCCl	2.7
114295	Cc1cc(Cl)nc(Cl)n1	2.72
4515704	O=C(O)c1cn(C2CC2)c2cc(Cl)c(F)cc2c1=O	2.76
7424981	CC(C)(C)OC(=O)N1CCC(CN)CC1	2.78
386135	S=C=NCc1ccccc1	2.8
2719681	NS(=O)(=O)c1ccccc1F	2.8
2045072	O=C(O)CSc1ccccc1	2.8
2330961	C[C@H](NC(=O)c1ccccc1)C(=O)O	2.8
109704	Nc1cc(=O)[nH][nH]1	2.8
131133	O=C1COc2ccccc2N1	2.8
6643539	NCc1ccc(F)c(F)c1	2.8
1853339	OCC12CC3CC(CC(C3)C1)C2	2.8
607433	O=c1[nH]nc2ccccn12	2.8
1074526	COC(=O)c1cc2ccccc2cc1O	2.8
7422669	OCC12CC3CC(CC(C3)C1)C2	2.8
2209732	COc1cccc(C=CC(=O)O)c1	2.8
1967457	CC(C)(C)c1cc(C(=O)O)cc(C(=O)O)c1	2.8
2046227	OC1CCCc2ccccc21	2.88
5733400	OC1CCCc2ccccc21	2.88
2413110	CC(N)CCc1ccccc1	2.88
7794366	OC1CCCc2ccccc21	2.88
10528812	NS(=O)(=O)C1CC1	2.88
1904409	CC1(O)C2CC3CC(C2)CC1C3	2.92
118364	O=C(O)c1ccc(Br)s1	2.92
2082805	CNc1ccc(C(=O)O)cc1	2.92
79843	OC[C@@H]1CCCN1	2.92
472192	O=C(O)c1cc[nH]c(=O)c1	2.92
27700068	OC[C@@H]1CCCN1	2.92
641412	O=C(O)CC12CC3CC(CC(C3)C1)C2	2.92
2115614	CC(C)(C)OC(=O)Nc1ccc(C(=O)O)cc1	2.92
4660531	CC(CO)NC(=O)OC(C)(C)C	2.92
742238	Cc1cc(O)nc(C)n1	3
2643789	N#CCc1ccc(OC(F)(F)F)cc1	3
139669	CC(=O)c1ccc2c(c1)OCO2	3
20513275	CC(Oc1ccccc1Cl)C(=O)O	3
20513274	CC(Oc1ccccc1Cl)C(=O)O	3
2645465	O=C(O)c1cccc(S(=O)(=O)Cl)c1	3
107858	N#CCCN1CCCCC1	3
2090140	NC(=O)Nc1ccc(Br)cc1	3
635722	C#CC(C)O	3
2693490	O=C(O)C12CC3CC(CC(O)(C3)C1)C2	3
4652596	C#CC(C)O	3
4652595	C#CC(C)O	3
1817334	CC(C)(C)c1ccc(O)cc1	3
28017288	O=C(O)C12CC3CC(CC(O)(C3)C1)C2	3
2361875	CCc1ccc(S(N)(=O)=O)cc1	3
2693449	O=C(O)c1ccc(SC(F)(F)F)cc1	3
1680024	Oc1ccc(Br)cc1	3
1422244	Cc1cc(=O)cc(C)[nH]1	3
2263916	CC(Oc1ccccc1Cl)C(=O)O	3
383673	Nc1ccncc1C(=O)O	3.04
3649727	O=C(O)Cc1ccc(F)cc1F	3.04
636626	NC1(C(=O)O)CCCC1	3.04
505989	CNCCN(C)C	3.04
6317610	CC(C)CC(N)C(=O)OC(C)(C)C.Cl	3.05
83736	OCC1COc2ccccc2O1	3.08
1924964	CCC1CCC(=O)CC1	3.08
4399355	CC(C)(C)OC(=O)Nc1ccncc1	3.08
2452800	O=C(O)/C=C/c1ccc(C(F)(F)F)cc1	3.12
126765	Cc1cc(C(=O)O)n(C)n1	3.14
2113538	CC(=O)Nc1ccc(OC(F)(F)F)cc1	3.16
6197169	CN1CCN(C(=O)OC(C)(C)C)CC1	3.16
2803286	NC(CC(=O)O)c1ccccc1	3.16
1933420	CCOc1ccc(F)cc1	3.2
4181087	COC(=O)c1ccccc1	3.2
2803940	CC(=O)Nc1ccc(F)cc1Br	3.2
16696087	Cc1cccc(C)n1	3.2
6593061	COC(=O)c1ccccc1	3.2
104363	NCCN1CCNCC1	3.2
4860760	COc1ccccc1	3.2
741982	CNc1ccccc1	3.2
8057001	O=C(O)CNc1ccccc1	3.2
1732991	CN(C)CCN(C)C	3.2
606215	CCC(=O)c1ccccc1	3.2
1973186	CNc1cccc2c1C(=O)c1ccccc1C2=O	3.2
1641383	O=C(c1ccc(F)cc1)N1CCCCC1	3.2
1072099	COC(=O)c1ccccc1	3.2
113196	Oc1ccc2ncccc2c1	3.2
2208105	CC(=O)Nc1cccc(Cl)c1	3.2
507468	CCNc1ccccc1	3.2
506892	COc1ccccc1	3.2
1820522	Cc1ccc(S(=O)(=O)Nc2ccccc2)cc1	3.2
6591998	COc1ccccc1	3.2
741984	NCc1ccccc1	3.2
509838	O=C(O)CNc1ccccc1	3.2
105690	Cc1cccc(C)n1	3.2
635746	C#CC(C)(C)O	3.2
4953033	CN(C)CCN(C)C	3.2
2041488	Cc1ccc(O)c(Cl)c1	3.28
121589	Brc1ccc2c(c1)CCO2	3.28
112029	O=C(O)c1ccncn1	3.28
2206127	C[C@@H](OC(C)(C)C)[C@H](N)C(=O)O	3.36
2045544	NC(=O)c1cccc(C(N)=O)c1	3.4
1919820	CC1CCCC(C)C1O	3.4
1448005	Cc1ccc2c(c1)C(=O)CC2	3.4
7514130	CC(O)c1ccccc1Cl	3.4
2235581	C#Cc1ccc(CC)cc1	3.4
2078679	CC(O)c1ccccc1Cl	3.4
7514131	CC(O)c1ccccc1Cl	3.4
2087585	COc1ccc(C(=O)O)cc1Br	3.44
956826	c1cn2c(n1)CCC2	3.45
2211032	CCOC(=O)NCc1ccccc1	3.45
383838	NCCc1ccc2c(c1)OCO2	3.48
5686	O=C(O)c1ccc2[nH]cnc2c1	3.48
3691486	Cl.Nc1cnccc1O	3.5
3691989	Cl.Nc1cnccc1O	3.5
2043992	O=C1CCCc2cc(O)ccc21	3.52
2964116	CNC(=O)Cc1ccc(O)cc1	3.52
2575403	CCCOC(=O)c1ccccc1O	3.6
10658455	O=C(O)C=Cc1c(F)cccc1Cl	3.6
2208085	COC(=O)Nc1ccccc1	3.6
3129946	O=C(O)/C=C/c1c(F)cccc1Cl	3.6
6938847	Cl.NCc1ccc(Br)cc1F	3.6
5662739	Cl.Fc1ccc2c(C3CCNCC3)noc2c1	3.64
19777884	Cl.Fc1ccc2c(C3CCNCC3)noc2c1	3.64
2963573	CC(=O)c1cc(F)ccc1F	3.64
111296	Cc1c[nH]c2ccccc12	3.68
6478526	Cc1c[nH]c2ccccc12	3.68
132192	Clc1nc(Cl)c2ccccc2n1	3.72
2693145	COc1ccc(Br)cc1/C=C/C(=O)O	3.8
6597621	CN(C)c1cccc2ccccc12	3.8
2209197	COC(C(=O)O)c1ccccc1	3.8
2208423	Cc1ccc(S(=O)(=O)F)cc1	3.8
2043986	O=C(O)/C=C/c1ccccc1F	3.8
1186	CCN1CCCC(O)C1	3.8
4660418	COC(=O)C1CCCN1	3.8
169197	CC(=O)c1ccc(N2CCCCC2)cc1	3.8
135505	O=c1[nH]c2ccc(Cl)cc2o1	3.8
4667910	COC(C(=O)O)c1ccccc1	3.8
1424075	CN(C)c1cccc2ccccc12	3.8
5734106	COC(C(=O)O)c1ccccc1	3.8
4660419	COC(=O)C1CCCN1	3.8
2209647	COc1ccc(O)c(C(=O)O)c1	3.8
510221	c1ccc(CCn2ccnc2)cc1	3.8
471645	COC(=O)C1CCCN1	3.8
3588317	COC(=O)C1CCCN1	3.8
3913700	Cl.NC1Cc2ccccc2C1	3.84
124652	O=C1CCOc2ccccc21	3.84
177824	O=C(O)c1ccc2c(c1)OCCO2	3.84
80670	O=C1CC[C@@H](CO)N1	3.84
107326	Brc1cncnc1	3.88
5813611	CC(C)(C)OC(=O)Nc1cccc(C(=O)O)c1	3.88
113622	O=C(O)Cc1ccsc1	3.92
6224	N#Cc1ccc2c(c1)OCO2	3.96
4674995	CC(C)(C)OC(=O)N1CCCCC1=O	3.96
2043187	CC(C)(C)C1CCC(C(=O)O)CC1	4
1720935	CC[C@H](N)C(=O)O	4
2207019	N#Cc1cc(Cl)cc(Cl)c1	4
2098306	CC(=O)NC12CC3CC(CC(C3)C1)C2	4
6477660	O=C(O)C(O)Cc1ccccc1	4
14571230	CC(C)(C)C1CCC(C(=O)O)CC1	4
2363443	CC(=O)Nc1cccc(C(C)=O)c1	4
5477746	O=C(O)C(O)Cc1ccccc1	4
3611986	CC(C)(C)OC(=O)NCC(O)c1ccccc1	4
31439054	CC(C)(C)C1CCC(C(=O)O)CC1	4
2209791	O=C(O)C(O)Cc1ccccc1	4
6055495	O=C(O)C(O)Cc1ccccc1	4
22169545	CC(C)(C)C1CCC(C(=O)O)CC1	4
124996	O=c1[nH]nnc2ccccc12	4.12
142066	O=C(Nc1ccccc1)c1cccnc1	4.2
5358972	COC(=O)CNc1ccccc1.Cl	4.24
10666228	O=C(O)C1(c2ccc(F)cc2)CCCC1	4.4
2365816	COC(=O)c1ccc(OC)c(Cl)c1	4.4
3696607	Cl.O=C(O)Cc1ccccn1	4.4
2042552	Cc1cccc(/C=C/C(=O)O)c1	4.4
14282961	Cl.O=C(O)Cc1ccccn1	4.4
136784	Nc1nc2c(Cl)cccc2s1	4.4
1948810	O=C(CCl)c1ccc(F)c(F)c1	4.4
776115	COc1cc(C#N)cc(OC)c1	4.4
607481	CCOC(=O)c1cc(C)n[nH]1	4.4
4798717	c1cncc(Cn2cccc2)c1	4.54545
13656643	CCc1nn(C)c(C(=O)O)c1Cl	4.56
23295992	CC(C)C1CCC(O)CC1	4.6
30332178	CC(C)C1CCC(O)CC1	4.6
2209639	COC(=O)c1ccc(Cl)c(Cl)c1	4.6
30332177	CC(C)C1CCC(O)CC1	4.6
2322224	CC(C)C1CCC(O)CC1	4.6
2049955	O=C(c1ccc(O)cc1)c1ccc(F)cc1	4.6
10261321	CC(C)C1CCC(O)CC1	4.6
2042139	CC(=O)c1cc(C)ccc1C	4.6
607050	Cc1nccn1CCO	4.6
128516	N#CCC(=O)N1CCCCC1	4.6
7743954	CC1CCCCC1=O	4.64
506751	CC1CCCCC1=O	4.64
22682802	CC1CCCCC1=O	4.64
11419655	CC(N)C(=O)OC(C)(C)C.Cl	4.76
107594	CC(C)(C)c1ccncc1	4.76
11419653	CC(N)C(=O)OC(C)(C)C.Cl	4.76
5296055	CC(N)C(=O)OC(C)(C)C.Cl	4.76
32074891	CC(N)C(=O)OC(C)(C)C.Cl	4.76
1942853	O=C(CCl)c1cc(F)ccc1F	4.8
5865723	CC(C)(C)OC(=O)NCc1cccnc1	4.8
1723835	CC(=O)NC(C(=O)O)C(C)C	4.8
136376	c1ccc(Cc2nnn[nH]2)cc1	4.8
8257724	COc1ccc(CO)cc1OC	4.8
9770997	COc1ccc(CO)cc1OC	4.8
639388	COc1ccc(CO)cc1OC	4.8
110305	O=C(O)C1CCOC1	4.82
7760333	COc1ccc(C(C)O)cc1	4.84
6712351	COc1ccc(C(C)O)cc1	4.84
9481788	COc1ccc(C(C)O)cc1	4.84
2043521	COc1ccc(C(C)O)cc1	4.84
3914281	CNCc1cccc2ccccc12.Cl	4.84
2208083	NC(=O)NCc1ccccc1	5
650595	Cc1ccc2c(c1N)C(=O)c1ccccc1C2=O	5
972039	O=C(O)c1ccc2ccccc2c1	5
103069	OCC1CCOCC1	5
112049	Cc1ccc(C(=O)O)cn1	5
3648839	C[C@H](CO)NC(=O)OC(C)(C)C	5
1747303	CC(C)(CN)C(N)=O	5
2097993	COc1ccc(OC)c(C(=O)O)c1	5
1721162	CCC[C@H](N)C(=O)O	5
1870159	O=C(O)C1CCCc2ccccc21	5
2081076	Oc1cc(F)ccc1F	5
3675088	Cl.NC1CCOCC1	5
107241	CC(=O)c1ccsc1	5
31641143	CC(C)(C)OC(=O)N1CCC[C@@H](O)C1	5
2354972	Cc1cc(C#N)ccc1Br	5
1938389	COc1cc(C(=O)O)ccc1C	5
1363868	N#Cc1ccc2ccccc2c1	5
6275865	CN(C)c1ccc(C(=O)c2ccccc2)cc1	5
775987	COc1cccc(N=C=S)c1	5
4661670	N#Cc1ccc[nH]c1=O	5
2082265	Oc1cccc(F)c1F	5
115819	Cc1noc(C)c1C(=O)O	5
2970373	O=S(=O)(Cl)c1ccc(F)cc1F	5
130710	O=S(=O)(Cl)c1ccc(Cl)s1	5
2041491	Cc1cc(Br)ccc1O	5
2100478	COC(=O)[C@H]1CC[C@H](C(=O)O)CC1	5
2211073	COC(=O)CCc1ccc(O)cc1	5
4449	Clc1ncc(Cl)c(Cl)n1	5
88577	NC(=O)[C@@H]1CCCN1C(=O)OCc1ccccc1	5
2616148	NC(=O)c1ccccc1C(F)(F)F	5
2650774	O=S(=O)(Cl)c1cccc(C(F)(F)F)c1	5
1936531	Cc1cc(C(=O)O)ccc1F	5
108120	Cn1cc(Br)cn1	5
2039954	OC12CC3CC(C1)CC(O)(C3)C2	5
7477024	CC(C)(C)OC(=O)N1CCCCC1CO	5
974321	O=S(=O)(Cl)c1ccccc1Cl	5
1700261	CN(C)CC(=O)O	5
7293817	O=C(O)c1ccc(F)cc1C(F)(F)F	5
2520501	CCOC(=O)C1CCC(=O)CC1	5
2574819	Cc1cc(F)ccc1C(=O)O	5
1906458	Oc1cc(Cl)cc(Cl)c1	5
3530423	COc1cc(Br)ccc1C(=O)O	5
14419749	CC1CNCC(C)N1	5
108732	Cc1cnc(Cl)nc1	5
1640927	CC(=O)Nc1ccc(CC(=O)O)cc1	5
1306961	CC(=O)c1ccc(C#N)s1	5
970950	O=C(O)c1ccc(O)cc1	5
5936353	CC(C)(C)OC(=O)N1CCCC(=O)C1	5
4179192	COc1cccc(F)c1C#N	5
4842199	O=C(O)[C@@H]1Cc2ccccc2CN1	5
122579	CC(=O)c1c[nH]c2ccccc12	5
2039750	COC(=O)C1CCC1	5
969568	CN(C)C(=O)CCl	5
1924167	C#CC1(O)CCCC1	5
5539297	CC(C)(C)OC(=O)N1CCCC(C(=O)O)C1	5
6969256	O=C(O)Cc1ccc2c(c1)CCO2	5
107171	Clc1ncccn1	5
1743037	CCOCC(=O)O	5
79881	CC1CNCC(C)N1	5
110899	O=C(O)c1cn[nH]c1	5
15713945	CC1CNCC(C)N1	5
110697	Cc1cc(C)nc(Cl)n1	5
5808447	O=C(O)c1cc(Br)ccc1F	5
8685079	CC(C)(C)OC(=O)N1CCC[C@H](O)C1	5
11403575	N#Cc1ccc(Br)c(F)c1	5
1940683	O=C(O)c1ccc(Br)c(Cl)c1	5
1859755	COc1ccccc1F	5
4798924	Cc1ccc(C#N)c(F)c1	5
1238754	CCC(=O)c1cccc(OC)c1	5
8039155	CC(C)(C)OC(=O)N[C@H]1CCN(Cc2ccccc2)C1	5
1704093	CC(=O)NCCC(=O)O	5
1745505	CC(C)(Br)C(N)=O	5
473259	Nc1cccc(C(F)(F)F)n1	5
2043678	CCOc1ccccc1Br	5
3563210	Cl.O=C(O)c1ccccn1	5
5933482	O=C(O)c1ccc(O)cc1	5
115143	COc1ccc(Cl)cn1	5
610594	O=C(CBr)c1cccc([N+](=O)[O-])c1	5
2078401	O=C1CC(C(=O)O)C1	5
9478387	N#CCc1ccc(F)cc1Cl	5
2048158	Cc1ccc(S(=O)(=O)CCl)cc1	5
2210867	CC(=O)Nc1cccc(C(=O)O)c1	5
8901485	O=C(O)c1ccc(Br)c(F)c1	5
8685078	CC(C)(C)OC(=O)N1CCC[C@@H](O)C1	5
5932910	N#Cc1ccc2ccccc2c1	5
638569	COC(=O)c1cccc(CBr)c1	5
2082472	Cc1cc(C(=O)O)ccc1O	5
116013	O=C(O)c1ccc(Br)cn1	5
3997269	CC(C)C(N)C(=O)OC(C)(C)C.Cl	5
2357199	O=C1CCc2cc(Br)ccc21	5
5498624	N#Cc1ccc(Br)cn1	5
107690	N#CC1CCOCC1	5
2249816	Cc1cc(Br)ccc1C(=O)O	5
742010	Oc1ccncn1	5
2211877	CN(C)c1ccc(C(=O)c2ccccc2)cc1	5
2573956	Cc1cc(C)cc(CC#N)c1	5
5514420	CC(C)(C)OC(=O)N1CC=CCC1	5
1524969	Oc1ccnc2ccccc12	5
3537272	C=CCNC(=O)OC(C)(C)C	5
2093095	COC(=O)c1ccc(C(C)=O)cc1	5
3197913	CC(c1cccc(O)c1)N(C)C	5
2207594	COC(=O)Cc1ccc(C)cc1	5
775324	N#Cc1ncc(Br)cn1	5
3604898	CC(C)(C)OC(=O)N1CCCCC1	5
3539259	NCc1ccc(F)cc1F	5
2078616	Oc1cc(F)cc(F)c1	5
2079929	OCCc1ccc(Br)cc1	5
1910424	O=C(O)CCc1ccc(Cl)cc1	5
160552	c1ccc2c(OCC3CO3)cccc2c1	5
104110	OCCN1CCCCCC1	5
111107	Cc1cccc(C#N)n1	5
971591	CCc1ccccc1C(=O)O	5
1098957	C1CCN(C2CCNCC2)CC1	5
605982	CCn1cccn1	5
128460	N#CCc1nc2ccccc2s1	5.08
883551	CC(=O)c1ccc(N2CCNCC2)cc1	5.2
20373599	OCC1CC2CCC1C2	5.2
20373598	OCC1CC2CCC1C2	5.2
913533	O=C(CCl)Nc1cccc([N+](=O)[O-])c1	5.2
18573374	O=S(=O)(Cl)c1c(F)cc(F)cc1Br	5.2
4950987	OCC1CC2CCC1C2	5.2
4024281	Cl.Fc1ccccc1N1CCNCC1	5.24
28737561	Cl.Fc1ccccc1N1CCNCC1	5.24
1560601	CC1=CC(=O)CCC1	5.24
5376842	CN(C)CC1CCCCC1=O	5.28
5376841	CN(C)CC1CCCCC1=O	5.28
1372641	Clc1ccc(Cl)c(OCC2CO2)c1	5.28
112192	Fc1ccc2cc[nH]c2c1	5.28
1935553	CN(C)CC1CCCCC1=O	5.28
5521616	CC(C)(C)OC(=O)N1CCCC(C#N)C1	5.28
7424061	O=C(O)/C=C/c1ccc(F)c(F)c1	5.3
108638	O=C(O)c1ccoc1	5.32
1877706	O=C(O)c1cc(Cl)c(Cl)cc1C(=O)O	5.354
115749	O=C1OCCN1CCO	5.4
7632963	Cc1cc(C#N)c(N)s1	5.4
1103151	O=C(O)COc1ccccc1Cl	5.4
5513255	Oc1ccccc1OCC(F)(F)F	5.4
15468693	O=C(O)c1ccccc1OC(F)F	5.4
1210322	CSc1ccc(O)cc1C	5.56
2208088	Cc1ccc(NC(N)=O)cc1	5.6
5761050	Br.NCC(N)C(=O)O	5.8
5591319	Br.NCC(N)C(=O)O	5.8
4518875	Br.NCC(N)C(=O)O	5.8
3702014	Cl.NCC(O)c1ccccn1	5.88
2036183	CC1(O)CCCC1	6
7915214	Oc1cc(F)ccc1Br	6
2640781	O=C(O)c1cccc(F)c1F	6
14531164	CCOC(=O)c1ccc(F)cc1Br	6
120745	Cc1ncsc1C(=O)O	6
22810844	N[C@H](CO)c1ccccc1	6
1906894	C=CS(=O)(=O)c1ccccc1	6
957382	CCOC(=O)Cc1ccc(F)cc1	6
977356	O=C(O)c1ccc(OC(F)(F)F)cc1	6
2251986	COc1cc(F)ccc1C(C)=O	6
473112	N#Cc1ncc(Br)cc1Br	6
1948580	COc1ccc(Cl)cc1C(=O)O	6
1282215	O=C1CCc2c(O)cccc21	6
2855	O=c1ccc2ccccc2[nH]1	6
115147	Brc1cccc2cccnc12	6
2209126	O=C(O)c1ccc(Br)cc1O	6
108393	Cc1ccnn1C	6
471420	CC1(C)CC(=O)C=C(N)C1	6
23348803	Cc1cc(F)ccc1C#N	6
3698309	Br.Nc1ncc(Br)s1	6
121263	OCc1nc2ccccc2[nH]1	6
878354	Cc1ccncc1Br	6
1968226	CCOC(=O)c1cccc(C(F)(F)F)c1	6
473106	Cc1c(Cl)cnc(N)c1Cl	6
4807050	CC(C)(C)OC(=O)N1CCC[C@H]1C(N)=O	6
22227681	O=C(O)C=Cc1cc(Br)ccc1F	6
742208	Fc1cnc(Cl)nc1	6
1756461	COC(=O)C(C)(C)C#N	6
606705	Brc1ccc2nccn2c1	6
2327507	CC(C)(C)OC(=O)c1ccc(F)cc1	6
103025	CN1CCC(N)CC1	6
2442261	O=C(O)c1cc(Cl)ccc1Br	6
1743108	CC(=O)NCCCl	6
2613799	Cc1ccc(Br)c(C(=O)O)c1	6
14571358	NS(=O)(=O)c1ccc(Br)c(F)c1	6
3196190	N[C@H](CO)c1ccccc1	6
2087583	COc1ccc(C(=O)O)cc1F	6
114974	COC(=O)C1CCOCC1	6
1638653	O=C(O)C1(c2ccccc2)CCCC1	6
13554624	NC(=O)c1ccc(Cl)cc1F	6
162065	O=C(O)c1cccc2c1OCCO2	6
7701063	N#Cc1cc(Br)ccc1F	6
606936	CCOC(=O)c1ccn[nH]1	6
1362970	Cc1cc[nH]c(=O)c1	6
2043613	Oc1c(F)cccc1F	6
108483	Oc1cncc(Br)c1	6
2692202	O=S(=O)(Cl)c1ccccc1Br	6
8974205	Cc1cc(F)ccc1C#N	6
3236449	Oc1cc(Br)ccc1Cl	6
128591	COC(=O)c1cncc(Br)c1	6
2042515	COC(=O)c1ccc(C)cc1C	6
2937139	O=S(=O)(Cl)c1cccc(Cl)c1	6
473060	COc1ncccc1C(=O)O	6
2356649	Cc1cc(C(=O)O)ccc1Br	6
480023	CC(C)(C)OC(=O)N1CCCC[C@@H]1C(=O)O	6
473142	Cc1cc(C)c(C#N)c(=O)[nH]1	6
22306946	Br.Nc1ncc(Br)s1	6
1912456	O=C(OCC(F)(F)F)OCC(F)(F)F	6
2613792	Cc1c(Br)cccc1C(=O)O	6
2045133	O=C(CCl)c1ccc(Br)cc1	6
383682	O=C(O)c1ccncc1Cl	6
107850	OCc1ccncc1	6
136068	O=C(O)c1ncc(Cl)cc1Cl	6
608838	O=C1C(=O)c2ccccc2-c2ccccc21	6
113876	N#Cc1ccc(N)nc1	6
1364840	CC(=O)c1cc(C)ccc1O	6
8831405	O=S(=O)(Cl)c1ccc(F)c(Cl)c1	6
606589	Brc1n[nH]c(Br)n1	6
2042059	OCCc1cccc(Cl)c1	6
119436	Nc1cc(Br)cnc1N	6.1
2838672	CC(=O)Nc1ccccc1CC(=O)O	6.12
2045884	O=C(OCCCl)c1ccccc1	6.2
2104083	Cc1ccc(C(=O)NCC(=O)O)cc1	6.2
8481787	CNC1CCN(C(=O)OC(C)(C)C)CC1	6.2
31562961	Cl.NCC(O)c1cccc(O)c1	6.32
514281	Brc1cn2ccnc2c(Br)n1	6.32
6074416	Cl.NCC(O)c1cccc(O)c1	6.32
3702105	Cl.NCC(O)c1cccc(O)c1	6.32
114589	CCC(CC)c1ccncc1	6.4
124275	OCCc1nc2ccccc2[nH]1	6.4
2936033	Cc1ccc(Cl)cc1CN	6.4
2096825	CC(=O)Nc1cc(Cl)ccc1Cl	6.4
14530704	CN1CCC(NCc2ccc(F)cc2)CC1	6.4
2574507	COC(=O)c1ccc(Br)cc1C	6.4
2209712	COc1ccccc1C=CC(=O)O	6.4
1971153	O=S(=O)(c1ccc(O)cc1)c1ccc(Cl)cc1	6.416
6314491	CCC(C)CC(C)N.Cl	6.44
908492	NC(=O)Nc1ccc(Cl)cc1	6.48
3600	Nc1cccnc1C(=O)O	6.6
125553	OCCc1c[nH]c2ccccc12	6.6
2695336	O=C(O)Cc1ccc(OC(F)(F)F)cc1	6.6
2575019	Cc1ccc(F)c(C(=O)O)c1	6.6
4971	Cc1nc2ncc(Br)cc2[nH]1	6.6
1861266	CC(Cl)C(=O)c1ccccc1	6.6
2690053	C=CC(=O)NCc1ccccc1	6.6
18308929	Cc1ccc(C(=O)O)c(F)c1F	6.6
2368286	CC(O)c1ccccc1C(F)(F)F	6.6
1450503	O=C(O)C=Cc1ccc2ccccc2c1	6.6
2651854	O=S(=O)(Cl)c1ccccc1C(F)(F)F	6.7
1866305	COc1cc(CO)cc(OC)c1	6.7
15480256	NC(=O)c1cc(Cl)ccc1F	6.8
2906	Cc1cc(C(=O)O)n[nH]1	6.8
15494535	CC1CC(C)CC(O)C1	6.8
2041417	CC(C)(C)C1CCCCC1=O	6.8
5245095	CC(C)(C)C1CCCCC1=O	6.8
5245094	CC(C)(C)C1CCCCC1=O	6.8
2036694	CC1CC(C)CC(O)C1	6.8
2416627	NS(=O)(=O)c1ccccc1-c1ccccc1	6.88
135964	OC1CCCN(Cc2ccccc2)C1	6.9
2854286	CC(C)(C)OC(=O)NCc1ccc(C(=O)O)cc1	7
2326445	OCCc1ccccc1Br	7
2729361	O=C(CCl)NC(=O)NC1CCCCC1	7
11085473	NC(=O)c1ccc(F)cc1F	7
114468	Brc1cccc2cnccc12	7
3650011	CC(C)(C)OC(=O)N1CCC[C@@H]1CO	7
3240512	COc1cccc(F)c1Br	7
81046	O=C(O)/C=C/c1ccco1	7
1740792	CCCCC(N)=O	7
385891	CCOC(=O)C(C)C#N	7
909556	Nc1nccc(C(F)(F)F)n1	7
2090370	NC(=S)Nc1cccc(Cl)c1	7
2802127	NC12CC3CC(C1)CC(O)(C3)C2	7
7918450	O=C(O)/C=C/c1cc(F)ccc1F	7
509667	NC(CCO)c1ccccc1	7
3694146	Cl.O=S1(=O)CCNCC1	7
5729994	CC(O)c1ccc(Br)cc1	7
1531023	O=S(=O)(Cl)c1c(Cl)cccc1Cl	7
1936498	Cc1ccc(C(=O)O)cc1Cl	7
31779688	Cc1ccc(F)cc1C(=O)O	7
4211612	Cl.O=C(c1ccco1)N1CCNCC1	7
507628	Brc1csc(Br)n1	7
2545	Cc1ccc2nc(C)ccc2c1	7
5850631	N[C@H](C(=O)O)c1ccc(F)cc1	7
4978139	COc1ncc(Cl)cc1Br	7
775202	COc1cccc(CCN)c1	7
2209703	COC(=O)c1ccc(N(C)C)cc1	7
385938	Nc1ccc(F)cn1	7
14085654	O=C(O)c1cc(F)cc(Cl)c1	7
6271108	CC(C)(C)OC(=O)N1CC[C@H](O)C1	7
9326824	CC(C)(C)OC(=O)NC1CCC(=O)CC1	7
3304358	O=C(O)CCc1cccc(C(F)(F)F)c1	7
3911480	COC(=O)C(C)(C)N.Cl	7
118200	CCOC(=O)c1cccnc1C	7
20623597	COC(=O)C(C)(C)N.Cl	7
5729990	CC(N)c1ccc(Br)cc1	7
102736	OC1CCOCC1	7
2626	O=C(O)c1cnc[nH]1	7
3117772	CC(=O)c1ccc(F)c(Cl)c1	7
5729989	CC(N)c1ccc(Br)cc1	7
2046068	CC(=O)c1c(F)cccc1F	7
107053	Cc1ccc(N)cn1	7
31350481	Cl.O=S1(=O)CCNCC1	7
4249974	O=C(O)c1cccnc1C(F)(F)F	7
5043	CCOC(=O)c1[nH]cnc1C	7
1633453	CC(C)NCCO	7
126932	Cc1nc(C)c(C(=O)O)o1	7
9256355	CC(C)(C)OC(=O)N1CC(CO)C1	7
6856744	C#Cc1ccc(OCC)cc1	7
118954	O=C(O)c1ncccc1O	7
112270	Cc1cccc(C(=O)O)n1	7
1860807	CC(C)(C)OC(=O)NCCCO	7
606574	c1cnc2[nH]ncc2c1	7
116526	Clc1nc2ccccc2[nH]1	7
6798740	CC(=O)c1cc(F)cc(F)c1	7
4660629	CC(O)c1ccc(Br)cc1	7
15559776	O=C(O)C1CC2CCCCC2N1	7
2412318	CC(N)c1ccc(Br)cc1	7
2574141	Cc1ccc(C(=O)O)cc1F	7
128635	O=C1Cc2cc(Br)ccc2N1	7
3031781	O=C(O)c1ccc(-c2ccc(O)cc2)cc1	7
2614288	O=C(O)c1cc(F)ccc1Cl	7
116627	Cc1cc2cc(F)ccc2[nH]1	7
2249813	Cc1ccc(F)cc1C(=O)O	7
2249814	Cc1ccc(Cl)cc1C(=O)O	7
5729995	CC(O)c1ccc(Br)cc1	7
107074	Cc1ccc(O)nc1	7
116472	O=c1cn[nH]c(=O)[nH]1	7
115921	NC(=O)c1cncc(Br)c1	7
15431741	O=C(O)C1CC2CCCCC2N1	7
2267339	O=C(O)Cc1ccccc1C(F)(F)F	7
116184	Cc1ccsc1C(=O)O	7
4247349	O=C(O)[C@@H]1Cc2ccccc2N1	7
1906683	Cc1ccc(Cl)cc1O	7
9258253	O=C(O)C1CC2CCCCC2N1	7
110912	Clc1cnc(Cl)nc1	7
1870425	CC(=O)c1ccc(C(F)(F)F)cc1	7
1761233	C=C(C(=O)O)C(F)(F)F	7
7535668	O=C(O)c1ccc(-c2ccc(O)cc2)cc1	7
18492489	Cc1cc(Br)cnc1C(=O)O	7
1721824	CC(C)(C)[C@H](N)C(=O)O	7
2045860	O=C(O)CCc1ccccc1Br	7
1564179	FC(F)(F)c1cc[nH]n1	7
1853584	CC1(C)CC1C(=O)O	7.04
1817692	CC(=O)NCc1ccccc1	7.08
164125	CC(=O)c1ccc2c(c1)OCCO2	7.2
120331	Cn1cncc1C(=O)O	7.2
4254035	NCC1CN(Cc2ccc(F)cc2)CCO1	7.2
8109757	OCC1CCCN1	7.2
1751166	CN(C)S(N)(=O)=O	7.2
1071413	OCCNC1CCCCC1	7.2
79844	OCC1CCCN1	7.2
4652869	OCC1CCCN1	7.2
1524768	O=C1CCCc2[nH]ccc21	7.2
2574090	Cc1ccc(F)c(C#N)c1	7.2
4652868	OCC1CCCN1	7.2
4803690	CC(C)(C)OC(=O)NCc1ccccn1	7.2
1457693	OCC1CCN(Cc2ccccc2)CC1	7.2
14655352	CC(C)(C)OC(=O)N(CC(=O)O)c1ccccc1	7.3
14355432	CC(C)(C)OC(=O)NC(C(=O)O)C1CCCCC1	7.3
15006606	CC(C)(C)OC(=O)N(CC(=O)O)c1ccccc1	7.3
5908163	CC(C)(C)OC(=O)NC(C(=O)O)C1CCCCC1	7.3
10664045	CC(C)(C)OC(=O)N(CC(=O)O)c1ccccc1	7.3
8996138	CC(C)(C)OC(=O)NC(C(=O)O)C1CCCCC1	7.3
9260226	O=C(O)CCc1ccc(F)c(F)c1	7.4
13859429	CC(C)(C#N)NC(=O)OC(C)(C)C	7.4
132902	Cc1cc(C)n(-c2ccccc2)n1	7.4
14302646	Cc1cc(F)cc(C(=O)O)c1	7.4
128669	O=C(O)c1cccc2cc[nH]c12	7.4
105401	CCc1ccco1	7.4
13198758	CNC(=O)C1CCN(C(=O)OC(C)(C)C)CC1	7.43
1190	CN(C)C1CCNCC1	7.44
112050	Cc1ccc(C(N)=O)cn1	7.5
119333	O=C(O)c1cc(Br)cs1	7.52
1209880	CNC(=O)c1ccccc1	7.6
4349655	NC(CS)C(=O)O	7.6
1619279	Brc1csc(C2OCCO2)c1	7.6
122813	COc1cc(C(=O)O)ccn1	7.6
110152	NC(=O)c1ccco1	7.6
124604	Cc1nc2ccccc2c(=O)o1	7.6
1746985	COC(C)(C)C(=O)O	7.6
127217	O=S(=O)(Cl)N1CCOCC1	7.6
977056	O=C=Nc1ccccc1C(F)(F)F	7.6
2738465	CN(C(=O)CCl)c1ccc([N+](=O)[O-])cc1	7.6
14384775	NC(CS)C(=O)O	7.6
8198862	NC(CS)C(=O)O	7.6
1721406	NC(CS)C(=O)O	7.6
2802384	CCc1ccc(N=C=S)cc1	7.72
121784	O=C(O)c1ccc(CO)o1	7.72
956930	O=C(O)CCn1ccnc1	7.8
141157	Oc1ccc(C2SCCS2)cc1	7.83
1526217	O=C1CCN(Cc2ccccc2)C1	7.9
2079629	CC(=O)c1cccc(C#N)c1	7.9
1954376	Oc1ccccc1OCc1ccccc1	7.9
6502798	C[C@@H](NC(=O)OC(C)(C)C)C(N)=O	7.92
2938004	NC(C(=O)O)c1cccc(Cl)c1	8
608285	NNC(=S)Nc1ccccc1	8
8146182	OC1CCCCC1O	8
2084316	O=C1CCCc2ccc(Br)cc21	8
15441303	O=C(O)c1ncc(F)cc1F	8
141837	COC(=O)c1ccc2cc[nH]c2c1	8
1743053	COCCC(=O)O	8
3240812	O=C(O)c1ccc(Cl)c(F)c1	8
2207355	CC(=O)c1ccc(C(=O)O)cc1	8
1873097	O=C(O)C1CCCC(C(=O)O)C1	8
4231142	N#Cc1ccc(Cl)cc1F	8
120820	O=S(=O)(Cl)c1cccnc1	8
1932887	CC(=O)c1ccc(C#N)cc1	8
5823915	CC(C)OC(=O)[C@@H](C)N.Cl	8
3976253	O=C(O)C1CCCN(C(=O)OCc2ccccc2)C1	8
6196333	CC(=O)c1cccc(OC(F)(F)F)c1	8
1936697	CC(=O)Cc1ccc(F)cc1	8
112610	OCCCc1ccncc1	8
9553709	O=S(=O)(Cl)c1ccc(F)c(F)c1F	8
122484	COC(=O)c1cccc(C)n1	8
972384	Cc1ccc(C(=O)O)c(F)c1	8
2041515	N#Cc1cccc(O)c1	8
7758134	N#Cc1ccc(CBr)c(F)c1	8
11118769	CC(C)(C)OC(=O)N1CC(N)C1	8
4182694	CC(C)(C)OC(=O)N1CCC(C#N)CC1	8
121585	O=C(O)c1sccc1Br	8
2041500	OCc1cccc(O)c1	8
116722	COc1ccc2[nH]ccc2c1	8
3538437	COc1ccc(Br)c(C)n1	8
2414476	N#CCC(=O)c1cccc(Cl)c1	8
2691657	NS(=O)(=O)c1ccc(Br)cc1	8
118357	Cc1ncc(C(=O)O)s1	8
110960	CC(=O)Cc1ccncc1	8
2720455	O=C(O)C(O)c1cccc(Cl)c1	8
2042025	CC(O)c1ccc(F)cc1	8
120560	CC(=O)c1sc(C)nc1C	8
123991	O=C(O)c1ccc2cc[nH]c2c1	8
83614	c1ccc(C2NCCc3ccccc32)cc1	8
606501	Cn1nccc1N	8
5329778	COC(=O)c1cc(F)ccc1C	8
1103424	NCc1ccccc1C(F)(F)F	8
9996289	Brc1ccc(N2CCCC2)nc1	8
3707780	Cc1ccc2[nH]cc(CCN)c2c1.Cl	8
3588327	CNCCNC(=O)OC(C)(C)C	8
121469	O=c1[nH]ncc(Br)c1Br	8
1931534	CC(=O)c1ccccc1Br	8
1526789	O=C1Cc2cc(F)ccc2N1	8
2093118	O=C(O)Cc1ccc(F)cc1Br	8
3538436	NCc1cc(F)cc(F)c1	8
6648421	O=C(O)CCc1ccc(C(F)(F)F)cc1	8
507309	CC(C)(C)C1CCC(=O)CC1	8
2089787	COc1cccc(OC)c1Br	8
124204	O=C(O)c1cc2ccccc2o1	8
128461	N#CCc1nc2ccccc2[nH]1	8
26601722	NS(=O)(=O)c1ccc(Br)cc1	8
742587	O=C(O)C#Cc1ccccc1	8
4688248	CC(C)(C)OC(=O)N[C@@H](CO)c1ccccc1	8
4180310	COc1cccc(F)c1C(=O)O	8
2594	c1ccc(-n2cccn2)cc1	8
2036627	OC1CCCCC1O	8
506799	C1CC2(CCN1)OCCO2	8
1210321	NCCc1ccccc1Cl	8
9479539	O=C(O)c1ccc(C(F)(F)F)nc1	8
2079577	Cc1ccc(C#N)cc1Cl	8
7739	N#CCc1ccc2c(c1)OCO2	8
20050195	C1CC2CNCC2C1.Cl	8
2090050	N#CCC(=O)c1ccc(F)cc1	8
2615127	COC(=O)c1ccc(CC#N)cc1	8
31681271	Cc1cc(O)ccc1F	8
116012	O=C(O)c1ccc(Cl)cn1	8
1863791	Cc1cccc(C)c1C(=O)O	8
18199386	NNC(=S)Nc1ccccc1	8
639664	COc1ccc(Br)cc1C(=O)O	8
8204749	OC1CCCCC1O	8
5931748	CC(C)(C)OC(=O)NC1CCNCC1	8
7870374	O=C(O)Cc1cccc(F)c1F	8
113292	O=C(O)C=Cc1ccncc1	8
2576486	O=C(O)c1c(F)cccc1Br	8
742396	COC(=O)c1cnc[nH]1	8
114399	COC(=O)c1ccccn1	8
23242942	C1CC2CNCC2C1.Cl	8
4664750	CC(C)(C)OC(=O)N1CCCC1	8
5378782	O=C(O)[C@H]1Cc2ccccc2CN1	8
11403576	COc1cc(Br)ccc1C#N	8
1906755	CC(C)Oc1ccccc1	8
127766	Nc1nc2ccc(Br)cc2s1	8
120888	N#Cc1c[nH]c2ccccc12	8
28939885	c1ccc(C2NCCc3ccccc32)cc1	8
27634524	OC1CCCCC1O	8
473757	Nc1ncc(Br)cc1C(=O)O	8
113831	N#Cc1cc(Cl)ccn1	8
5263961	O=C(O)C1Cc2ccccc2CN1	8
414759	O=C(O)C1CCN(C(=O)OCc2ccccc2)CC1	8
126542	O=C(O)c1cnc2ccccc2c1	8
103712	CN1CCC(CO)CC1	8
2087584	COc1ccc(C(=O)O)cc1Cl	8
1929677	Cc1cc(C)cc(C#N)c1	8
126544	O=C(O)c1ccc2ncccc2c1	8
8678330	N#Cc1cc(F)ccc1Br	8
130729	NS(=O)(=O)c1ccc(Br)s1	8
10343041	O=C(O)C1Cc2ccccc2CN1	8
2831218	CNCc1ccc(Cl)cc1Cl	8
1528657	O=S(=O)(Cl)c1cc(Cl)cc(Cl)c1	8
111080	O=C(O)c1cscn1	8
137073	COC(=O)c1ccc2ncccc2c1	8
2354310	OCCc1ccc(F)cc1	8
124500	Clc1cc(Cl)c(Cl)nn1	8
2848891	CC(C)(C)OC(=O)Nc1ccccc1C(=O)O	8
971606	CN(C)c1ccc(C#N)cc1	8
4247483	CC(=O)N1CCCC1C(=O)O	8
1527618	O=c1ccc(C(F)(F)F)c[nH]1	8
14573454	CC(C)(C)OC(=O)C1CCNCC1.Cl	8
2719088	COC(=O)c1cc(Cl)ccc1OC	8
1098717	N#CC1CCCC1	8
7914364	Nc1cncc(F)c1	8
2250621	CC(C)(C)OC(=O)NCC(N)=O	8
6386696	N#CCc1cc(F)cc(F)c1	8
1099446	N#Cc1ccsc1N	8
7794309	COC(=O)c1ccc(Br)cc1F	8
2212157	N[C@H](Cc1ccc(O)cc1)C(=O)O	8
2575955	CS(=O)(=O)c1ccc(C#N)cc1	8
4426016	CC(C)(C)OC(=O)N1CCNC(=O)C1	8
165775	O=C(O)C1Cc2ccccc2CN1	8
2574075	Cc1c(Br)cccc1C#N	8
114880	Clc1cccc2[nH]ccc12	8
112249	O=C(O)C1CCOCC1	8
9481785	CC(O)c1ccc(F)cc1	8
2614293	O=C(O)c1ccc(Br)cc1Br	8
1526871	COc1cccc(OC)c1O	8
5430077	COc1ccc2[nH]ccc2c1	8
2048750	COC(=O)c1cccc(C(=O)O)c1	8
2438793	O=C(O)c1cc(Cl)cc(Br)c1	8
2079752	CCOc1cccc(Br)c1	8
116502	N#Cc1ccc2cc[nH]c2c1	8
386634	COC(=O)c1ncccc1C	8
1361401	OC1COC1	8
2446892	O=C(O)Cc1ccc(F)c(Br)c1	8
6966442	CC(=O)c1ccc(O)cc1F	8
27703249	CC1CCC(C)C(O)C1	8
115848	Nc1cncc(C(=O)O)c1	8
2804320	CN(C)c1ccc(/C=C/C(=O)O)cc1	8
7424193	CC(C)(C)OC(=O)NC1CCCNC1	8
4249362	CC(C)(C)NS(=O)(=O)c1cccs1	8
7127637	O=C(O)c1cccc(Cl)c1F	8
5533475	CC(C)(C)OC(=O)N1CCC(C(N)=O)CC1	8
3706	Nc1n[nH]c2ccccc12	8
26917052	CN1CCC(C(=O)O)CC1.Cl	8
3610437	CC(C)(C)OC(=O)N1CCC(C(=O)O)C1	8
3235528	CNCc1cccc(Br)c1	8
18520837	O=C(O)C1CCCC(C(=O)O)C1	8
2078804	Cc1cc(O)ccc1F	8
2995	Clc1cccc2cccnc12	8
131631	O=C(O)c1ccnc(C(=O)O)c1	8
3701710	Cl.O=C(O)CN1CCOCC1	8
2641692	COc1ccc(C(=O)O)c(Br)c1	8
636470	Nc1cncc(Cl)n1	8
4336639	Cl.O=C(c1ccc(F)cc1)C1CCNCC1	8
5850868	CC(C)(C)OC(=O)N1CCCC(CO)C1	8
7004851	COc1ccc(F)c(Br)c1	8
472161	O=C(O)c1cccc(=O)[nH]1	8
9623425	O=C(O)c1cc(F)cc(C(F)(F)F)c1	8
2086231	Cc1ccc(O)cc1C(=O)O	8
2646649	CS(=O)(=O)c1ccc(CC(=O)O)cc1	8
107080	OCCc1ccsc1	8
108522	Cc1noc(C)c1Br	8
1866675	O=C(O)CCc1ccccc1F	8
3691153	Cl.c1ccc2c(c1)CNC2	8
106460	OCc1ccsc1	8
4670166	CC(C)(C)OC(=O)N1CCC(O)C1	8
135260	Cc1nc(Cl)c(N)c(Cl)n1	8
2734412	CC(C)(C)OC(=O)NC1(C(=O)O)CCCC1	8
1958334	NC(=O)CS(=O)(=O)c1ccccc1	8
8764123	OC1CCCCC1O	8
7810898	COC(=O)c1cc(Br)ccc1NC(C)=O	8
8141684	CC(=O)N1CCCC1C(=O)O	8
2047377	CCOC(=O)Cc1cccc(Cl)c1	8
9483588	CC(O)c1ccc(F)cc1	8
7700177	Cc1ccc(C#N)cc1F	8
6844956	O=C(O)Cc1cc(F)ccc1F	8
2802715	NCCc1ccccc1Br	8
114094	Cc1cc(C(=O)O)no1	8
2208567	COC(=O)c1cccc(OC)c1	8
107612	CC1=NNC(=O)CC1	8
1938788	COc1ccccc1C(=O)CBr	8
1947769	O=C(O)Cc1cc(Cl)cc(Cl)c1	8
2209124	O=C(O)c1ccc(F)cc1O	8
383678	O=C(O)c1ccncc1F	8
2651	Clc1ccc2[nH]ccc2c1	8
124207	O=C(O)c1cnc(Br)s1	8
83201	CC(=O)N1CCCC1C(=O)O	8
3912411	CCOC(=O)C(N)C(C)C.Cl	8
2040366	C#Cc1cccc(Cl)c1	8
778949	COc1ccccc1NC(N)=S	8
32631836	Cl.c1ccc2c(c1)CNC2	8
1721206	CCC(C)NC(N)=O	8
127748	Nc1nc2ccc(F)cc2s1	8
607119	Clc1ccc2nccn2n1	8
31985209	CC(C)OC(=O)[C@@H](C)N.Cl	8
2086970	CC(=O)Nc1ccccc1Br	8
1766129	C=C(CC(=O)OC)C(=O)O	8
1524180	O=c1[nH]cccc1O	8
105105	OCCCN1CCOCC1	8
1919000	OCC1CCCC1	8
3588328	CC(C)(C)OC(=O)NCCCN	8
1938662	OCC(CO)c1ccccc1	8
1422044	Cc1ccc[nH]c1=O	8
111188	Cc1cccc(CO)n1	8
2575714	N#CCc1ccc(F)c(F)c1	8
473050	COC(=O)c1ccc(Br)cn1	8
11294873	NC(=O)c1ccc(C(F)(F)F)nc1	8
1422252	Cc1cncc(Br)c1	8
132104	Cc1c(C(=O)O)oc2ccccc12	8
112964	Brc1ccc2ncccc2c1	8
123537	NS(=O)(=O)c1cccs1	8
15693981	CC(C)OC(=O)N1CCC(O)CC1	8
2362053	O=C(O)c1ccc(Cl)cc1Br	8
[truncated: 22,398 more rows]

## Sheet: KEGG commercial molecules
KEGG molecule ID	SMILES	CAS	Names	Price (USD/g)	Corresponding Reaxys molecule ID
C20441	OCc1ccco1	98-00-0	Furfuryl alcohol, 2-Furancarbinol, 2-Furanmethanol	0.053	106291
C00423	O=C(O)/C=C/c1ccccc1	140-10-3	trans-Cinnamate, trans-Cinnamic acid, (E)-Cinnamate, (2E)-3-Phenylprop-2-enoate	0.066	1905952
C10438	O=C(O)/C=C/c1ccccc1	621-82-9	Cinnamic acid, Benzeneacrylic acid	0.066	1905952
C11118	CN1CCCC1=O	872-50-4	N-Methyl-2-pyrrolidinone, 1-Methyl-2-pyrrolidinone, N-Methylpyrrolidone	0.08	106420
C03485	OCc1ccccc1	nan	Aromatic primary alcohol, Aromatic alcohol	0.09	878307
C00556	OCc1ccccc1	100-51-6	Benzyl alcohol, alpha-Hydroxytoluene, Benzenemethanol, Phenylmethanol, Phenylcarbinol, Hydroxymethylbenzene	0.09	878307
C00809	CC12CCC(CC1=O)C2(C)C	464-48-2	(-)-Camphor, (-)-Bornan-2-one	0.13	6475829, 27143556, 3588456, 1907611
C18369	CC12CCC(CC1=O)C2(C)C	76-22-2	dl-Camphor, Camphor	0.13	6475829, 27143556, 3588456, 1907611
C06712	O=C1c2ccccc2-c2ccccc21	486-25-9	Fluoren-9-one, 9-Fluorenone	0.132	1636531, 3546256
C07446	O=C(O)c1ccncc1	55-22-1	Isonicotinic acid	0.138	109599
C07211	Cc1cccc(C(=O)O)c1	99-04-7	m-Methylbenzoate, m-Toluic Acid, beta-Bethylbenzoic acid, m-Toluylic acid	0.168	970526
C01546	O=C(O)c1ccco1	88-14-2	2-Furoate, 2-Furoic acid, 2-Furancarboxylic acid, Pyromucic acid	0.172	110149
C02370	O=C(O)c1ccc(Cl)cc1	74-11-3	4-Chlorobenzoate, 4-Chlorobenzoic acid	0.173	907196
C16436	CC(C)C(N)C(=O)O	516-06-3	Valine	0.198	4229953, 8253832, 4654966, 6130713, 506689
C14535	CC(C)(C)c1ccc(C(=O)O)cc1	98-73-7	4-t-Butylbenzoic acid, p-tert-Butylbenzoic acid	0.2	607545
C10700	CC(=O)c1ccc(O)cc1	99-93-4	"4-Hydroxyacetophenone", (4-Hydroxyphenyl)ethan-1-one	0.2	774355
C11714	Oc1cccc2ccccc12	90-15-3	1-Naphthol, alpha-Naphthol	0.2	4248100, 1817321, 16527350
C00711	O=C(O)CC(O)C(=O)O	617-48-1	Malate, Malic acid, 2-Hydroxybutanedioic acid	0.2	4660743, 1723539, 11837746, 5246123, 4660744, 8036414, 4291637
C07215	Cc1ccccc1C(=O)O	118-90-1	o-Toluate, o-Methylbenzoate, o-Toluic Acid, 2-Methylbenzoic acid	0.2	1072103
C00490	C=C(CC(=O)O)C(=O)O	97-65-4	Itaconate, Itaconic acid, Methylenesuccinic acid	0.2	1759501
C00463	c1ccc2[nH]ccc2c1	120-72-9	Indole, 2,3-Benzopyrrole	0.2	107693, 4393542
C02181	O=C(O)COc1ccccc1	122-59-8	Phenoxyacetate, Phenoxyacetic acid	0.2	907949
C06337	O=C(O)c1ccc(C(=O)O)cc1	100-21-0	Terephthalate, Terephthalic acid, 1,4-Benzenedicarboxylic acid	0.2	1909333
C02359	O=C(O)c1ccccc1F	445-29-4	2-Fluorobenzoate, 2-Fluorobenzoic acid	0.22	971265
C03077	O=C(O)Cc1ccc(Cl)cc1	1878-66-6	4-Chlorophenylacetate, 4-Chlorophenylacetic acid	0.24	1072816
C16212	O=C(O)c1cc2ccccc2cc1O	92-70-6	3-Hydroxy-2-naphthoate	0.24	744100
C00763	O=C(O)[C@H]1CCCN1	344-25-2	D-Proline	0.264	80811
C02057	NC(Cc1ccccc1)C(=O)O	150-30-1	Phenylalanine, alpha-Amino-beta-phenylpropionic acid	0.28	3589441, 3589442, 4669367, 10535193, 1910407, 6767804, 8256685, 4669366
C02234	N#Cc1ccncc1	100-48-1	4-Cyanopyridine	0.28	107712, 473257
C06647	CC(=O)c1ccc(Cl)cc1	99-91-2	4-Chloroacetophenone, p-Chloroacetophenone	0.28	386014, 6391572
C04294	Cc1ncsc1CCO	137-00-8	5-(2-Hydroxyethyl)-4-methylthiazole, "4-Methyl-5-(2-hydroxyethyl)-thiazole", 4-Methyl-5-(2-hydroxyethyl)thiazole	0.28	114249
C02519	COc1ccc(C(=O)O)cc1	100-09-4	4-Methoxybenzoate, 4-Methoxybenzoic acid, 4-Anisic acid	0.28	508910
C03203	O=C(O)c1ccc2ccccc2c1O	86-48-6	1-Hydroxy-2-naphthoate, 1-Hydroxy-2-naphthoic acid, 1-Naphthol-2-carboxylic acid	0.28	974438
C00587	O=C(O)c1cccc(O)c1	99-06-9	3-Hydroxybenzoate, 3-Hydroxybenzoic acid, m-Hydroxybenzoic acid	0.28	508160
C02371	O=C(O)c1ccc(F)cc1	456-22-4	4-Fluorobenzoate, 4-Fluorobenzoic acid	0.28	30648564, 1906922
C11918	Cc1occc(=O)c1O	118-71-8	Maltol	0.28	112169
C13342	CCC(=O)c1ccc(O)cc1	70-70-2	p-Hydroxypropiophenone, Paroxypropione	0.32	907511
C03665	CC(C)(N)C(=O)O	62-57-7	2-Amino-2-methylpropanoate, 2-Aminoisobutyric acid	0.32	506496
C03722	O=C(O)c1cccnc1C(=O)O	89-00-9	Quinolinate, Pyridine-2,3-dicarboxylate, Quinolinic acid, 2,3-Pyridinedicarboxylic acid	0.32	137110
C00148	O=C(O)[C@@H]1CCCN1	147-85-3	L-Proline, 2-Pyrrolidinecarboxylic acid	0.32	80810, 20130084
C01606	O=C(O)c1ccccc1C(=O)O	88-99-3	Phthalate, o-Phthalic acid, 1,2-Benzenedicarboxylic acid	0.32	608199
C05853	OCCc1ccccc1	60-12-8	Phenylethyl alcohol, Phenethyl alcohol, 2-Phenylethanol	0.32	1905732
C19445	COC(N)=O	598-55-0	Methyl carbamate	0.32	635779
C06670	O=C(O)c1ccc(Cl)cc1Cl	50-84-0	2,4-Dichlorobenzoate, 2,4-Dichlorobenzoic acid	0.32	1868192
C07088	O=C(O)COc1ccc(Cl)cc1	122-88-3	4-Chlorophenoxyacetate, 4-CPA	0.32	1211804
C14230	O=C(c1ccccc1)c1ccc(O)cc1	1137-42-4	4-Hydroxybenzophenone, (4-Hydroxyphenyl)phenylmethanone	0.32	777776
C18319	CCC(C)C(=O)O	116-53-0	2-Methylbutyrate, 2-Methylbutyric acid	0.36	6130638, 1098537, 4653730
C02357	O=C(O)c1ccccc1Cl	118-91-2	2-Chlorobenzoate, 2-Chlorobenzoic acid, o-Chlorobenzoic acid	0.36	907340
C05629	O=C(O)CCc1ccccc1	501-52-0	Phenylpropanoate, 3-Phenylpropanoate, 3-Phenyl-propionic acid, 3-Phenylpropanoic acid, 3-Phenylpropionic acid	0.37	907515
C19915	O=C(O)c1cnccn1	98-97-5	Pyrazinoic acid, 2-Pyrazinecarboxylic acid	0.384	112305
C01157	O=C(O)[C@@H]1C[C@@H](O)CN1	51-35-4	Hydroxyproline, L-Hydroxyproline, trans-4-Hydroxy-L-proline	0.384	81441
C20362	CCc1occc(=O)c1O	4940-11-08	Ethyl maltol	0.4	1618110
C09840	Cc1ccc(C(C)C)cc1O	499-75-2	Carvacrol	0.4	1860514
C18528	Cc1cc(Cl)ccc1OCC(=O)O	94-74-6	MCPA, (2-Methyl-4-chlorophenoxy)acetic acid	0.44	2051752
C00188	C[C@@H](O)[C@H](N)C(=O)O	72-19-5	L-Threonine, 2-Amino-3-hydroxybutyric acid	0.44	1721646, 1721647
C02018	N#Cc1cnccn1	19847-12-2	Cyanopyrazine, 2-Cyanopyrazine	0.44	110008
C17926	NCc1ccccn1	3731-51-9	2-Pyridinemethanamine	0.44	108054
C03076	O=C(O)Cc1ccc(Br)cc1	1878-68-8	4-Bromophenylacetate, 4-Bromophenylacetic acid	0.47	972146
C00042	O=C(O)CCC(=O)O	110-15-6	Succinate, Succinic acid, Butanedionic acid, Ethylenesuccinic acid	0.5	1754069
C02596	Cc1ccccc1CC#N	22364-68-7	Tolylacetonitrile, o-Tolylacetonitrile, o-Methylbenzyl cyanide, 2-Methylbezeneacetonitrile	0.5	907182
C08262	CC(C)CC(=O)O	503-74-2	3-Methylbutanoic acid, Isovaleric acid, Isovalerate	0.5	1098522
C01537	CCOC(N)=O	51-79-6	Urethane, Ethyl carbamate	0.5	635810
C01454	Cc1ccc(C(=O)O)cc1	99-94-5	Toluate, p-Toluate, p-Toluic acid, 4-Methylbenzoic acid, Toluenecarboxylic acid, Crithminic acid	0.5	507600
C11713	Oc1ccc2ccccc2c1	135-19-3	2-Naphthol, beta-Naphthol	0.5	16527315, 742134, 4247319
C01984	O=C(O)[C@@H](O)c1ccccc1	17199-29-0	(S)-Mandelate, (S)-2-Hydroxy-2-phenylacetic acid, (S)-2-Hydroxy-2-phenylacetate, (S)-Mandelic acid	0.5	2208678, 19769266
C02364	O=C(O)c1cccc(F)c1	455-38-9	3-Fluorobenzoate, 3-Fluorobenzoic acid	0.5	1906920
C02595	O=C(O)Cc1cccs1	1918-77-0	Thien-2-ylacetate, 2-Thiopheneacetic acid, 2-Thienylacetic acid	0.52	114551
C21399	CC(C)CCC(=O)O	nan	Isocaproate, 4-Methylpentanoate	0.52	1741912
C11255	CC1=C(C(=O)Nc2ccccc2)SCCO1	5234-68-4	Carboxin	0.55	983249
C14741	Cc1cc(O)ccc1C(C)C	3228-02-02	4-Isopropyl-3-methylphenol, 4-Isopropyl-m-cresol, o-Cymen-5y-ol	0.57	1364028
C06695	O=C1NCCO1	497-25-6	2-Oxazolidinone	0.6	106251
C09822	O=C(O)C1CCCCC1	98-89-5	Cyclohexane-1-carboxylate, Cyclohexanecarboxylic acid, Hexahydrobenzoic acid	0.6	970529
C18623	N[C@H](C(=O)O)c1ccccc1	nan	L-Phenylglycine, Phenylglycine	0.6	2208675, 14543722
C22203	O=C(O)c1cccc(C(=O)O)c1	121-91-5	Isophthalate, Isophthalic acid	0.6	1909332
C00803	CCCCC(=O)O	109-52-4	Pentanoate, Valerate, Pentanoic acid, Valeric acid, Valerianic acid, n-Pentanoate, n-Valeric acid	0.6	969454
C07113	CC(=O)c1ccccc1	98-86-2	Acetophenone, 1-Phenylethanone, Phenyl methyl ketone, Acetylbenzene, Methyl phenyl ketone	0.7	6193303, 3604491, 4128809, 605842
C03493	N[C@@H](C(=O)O)c1ccc(O)cc1	22818-40-2	D-4-Hydroxyphenylglycine, (alphaR)-alpha-Amino-4-hydroxybenzeneacetic acid	0.7	2210998
C02265	N[C@H](Cc1ccccc1)C(=O)O	673-06-3	D-Phenylalanine, D-alpha-Amino-beta-phenylpropionic acid	0.72	2804068
C02395	O=C1C=CCCC1	930-68-7	Cyclohex-2-enone, 2-Cyclohexen-1-one	0.77	1280477
C06672	COc1cc(C(=O)O)ccc1O	121-34-6	Vanillate, Vanillic acid, 4-Hydroxy-3-methoxybenzoate, 4-Hydroxy-3-methoxybenzoic acid	0.8	2208364
C02752	Cc1cc(O)cc(=O)o1	675-10-5	Triacetate lactone, 4-Hydroxy-6-methyl-2-pyrone	0.8	113815
C11040	N#Cc1c(Cl)cccc1Cl	1194-65-6	Dichlobenil, 2,6-Dichlorobenzonitrile	0.8	1909167
C02323	OCc1ccccc1O	90-01-7	Salicyl alcohol, Saligenin, 2-Hydroxybenzyl alcohol, 2-(Hydroxymethyl)phenol	0.8	1907195
C03114	Cc1cc2nc[nH]c2cc1C	582-60-5	Dimethylbenzimidazole, 5,6-Dimethylbenzimidazole	0.82	116595
C12312	O=C1Cc2ccccc2N1	nan	Indolin-2-one	0.82	114692
C00811	O=C(O)/C=C/c1ccc(O)cc1	7400-08-0, 501-98-4	4-Coumarate, p-Coumaric acid, trans-4-Hydroxycinnamate, trans-p-Hydroxycinnamate, 4-Hydroxycinnamic acid, 4-Hydroxycinnamate	0.94	2207383
C00525	N[C@H](Cc1c[nH]c2ccccc12)C(=O)O	153-94-6	D-Tryptophan	1	86198
C00539	O=C(O)c1ccccc1	nan	Aromatic acid, Aromatic carboxylic acid	1	636131
C00180	O=C(O)c1ccccc1	65-85-0	Benzoate, Benzoic acid, Benzenecarboxylic acid, Phenylformic acid, Dracylic acid	1	636131
C01744	O=C(O)CCc1ccc(O)cc1	501-97-3	Phloretate, Phloretic acid, 3-(4-Hydroxyphenyl)propanoate, 3-(4-Hydroxyphenyl)propionic acid	1	2209841
C16435	O=C(O)C1CCCN1	609-36-9	Proline	1	8479425, 4658737, 80809, 3588099, 4903975, 5244083, 8479424
C20343	CC(C)OC(=O)c1ccc(O)cc1	4191-73-5	Isopropylparaben, Isopropyl 4-hydroxybenzoate	1	2641564
C01411	CC1(C)C2CCC1(C)C(O)C2	507-70-0	Borneol	1	15621794, 8141867, 4349564, 18070245, 4781094, 15602032, 21954917, 9858013, 6052111
C00135	N[C@@H](Cc1c[nH]cn1)C(=O)O	71-00-1	L-Histidine, (S)-alpha-Amino-1H-imidazole-4-propionic acid	1	84088
C07728	O=C1Cc2ccccc2CO1	4385-35-7	3-Isochromanone, 1,4-Dihydro-3H-2-benzopyran-3-one	1	123692
C08063	O=C1CCC(=O)CC1	637-88-7	1,4-Cyclohexanedione	1	774152
C00097	N[C@@H](CS)C(=O)O	52-90-4	L-Cysteine, L-2-Amino-3-mercaptopropionic acid	1	1721408
C00407	CC[C@H](C)[C@H](N)C(=O)O	73-32-5	L-Isoleucine, 2-Amino-3-methylvaleric acid	1.16	1721796, 1721792, 20130123
C18575	c1ccc2nccnc2c1	91-19-0	Quinoxaline	1.2	109351, 957426
C01536	NC(Cc1ccc(O)cc1)C(=O)O	556-03-6	Tyrosine, 3-(p-Hydroxyphenyl)alanine, 2-Amino-3-(p-hydroxyphenyl)propionic acid	1.2	4675158, 6131731, 4675159, 515881, 8259543, 8630624
C14103	Cc1ccc(C(=O)O)c(O)c1	50-85-1	4-Methylsalicylate, m-Cresotic acid, 2-Hydroxy-4-methylbenzoic acid	1.2	2208140
C01570	CC(C)C[C@@H](N)C(=O)O	328-38-1	D-Leucine, D-2-Amino-4-methylvaleric acid	1.2	14543721, 1721721
C00806	NC(Cc1c[nH]c2ccccc12)C(=O)O	54-12-6	Tryptophan, alpha-Amino-beta-(3-indolyl)-propionic acid	1.2	29116218, 4686567, 86196, 489608, 6481877, 3591959, 3591960
C01504	O=C1CCc2ccccc21	83-33-0	Indanone, Hydrindone, 1-Indanone, 1H-Inden-1-one, 2,3-dihydro-	1.2	507957
C10901	Nc1nc2ccccc2[nH]1	934-32-7	2-Aminobenzimidazole	1.2	116525
C01983	O=C(O)[C@H](O)c1ccccc1	nan	(R)-Mandelate, (R)-2-Hydroxy-2-phenylacetic acid, (R)-2-Hydroxy-2-phenylacetate, (R)-Mandelic acid	1.2	2691094
C14091	O=C(O)c1cccc2ccccc12	86-55-5	1-Naphthoic acid, 1-Carboxynaphthalene, alpha-Naphthoic acid	1.39	4746332, 1908896
C07727	O=C1Cc2ccccc2C1	615-13-4	2-Indanone, 2H-Inden-2-one, 1,3-dihydro-	1.4	636550
C03766	N#CCc1ccc(O)cc1	14191-95-8	4-Hydroxyphenylacetonitrile, 4-Hydroxybenzyl cyanide	1.4	1934470
C03352	COc1cccc(CO)c1	6971-51-3	3-Methoxybenzyl alcohol, 3-Anise alcohol, 3-Anisyl alcohol	1.4	2042063, 9326153
C14393	O=C(OCc1ccccc1)c1ccc(O)cc1	94-18-8	Benzylparaben, Benzyl parahydroxybenzoate, Benzyl 4-hydroxybenzoate	1.48	2115995
C14385	CCc1ccccc1O	90-00-6	2-Ethylphenol, o-Ethylphenol	1.6	1099397
C00740	N[C@H](CO)C(=O)O	312-84-5	D-Serine	1.6	1721403
C00783	CN1C2CCC1CC(=O)C2	532-24-1	Tropinone, 3-Tropanone	1.6	2329
C05852	O=C(O)Cc1ccccc1O	614-75-5	2-Hydroxyphenylacetate, 2-Hydroxyphenylacetic acid	1.6	908000
C00334	NCCCC(=O)O	56-12-2	4-Aminobutanoate, 4-Aminobutanoic acid, 4-Aminobutyrate, 4-Aminobutyric acid, gamma-Aminobutyric acid, GABA	1.6	31897116, 906818
C19087	CN(C)C(=O)Nc1ccc(Cl)cc1	150-68-5	Monuron	1.68	2097922
C05942	O=C(O)c1ccc[nH]1	nan	Pyrrole-2-carboxylate	1.76	80825
C01012	CC1(C)COC(=O)[C@@H]1O	599-04-2	(R)-Pantolactone, (R)-Pantoyl lactone, (3R)-Dihydro-3-hydroxy-4,4-dimethyl-2(3H)-furanone	1.8	80957
C07213	Cc1ccccc1CO	89-95-2	2-Methylbenzyl alcohol	1.8	1929783
C12865	O=C(OCc1ccccc1)c1cccnc1	94-44-0	Benzyl nicotinate, Nicotinic acid benzyl ester	1.8	159169
C20635	COC(=O)Cc1c[nH]c2ccccc12	1912-33-0	Methyl (indol-3-yl)acetate	1.99	158031
C05659	COc1ccc2[nH]cc(CCN)c2c1	608-07-1	5-Methoxytryptamine, 5-MeOT	2	145587
C02505	NC(=O)Cc1ccccc1	103-81-1	2-Phenylacetamide, alpha-Phenylacetamide	2	507886
C00716	NC(CO)C(=O)O	302-84-1	Serine, 2-Amino-3-hydroxypropionic acid, 3-Hydroxyalanine	2.16	3587640, 8309496, 6130745, 13179721, 1721402
C16434	CCC(C)C(N)C(=O)O	443-79-8	Isoleucine	2.2	20368482, 20316644, 28220025, 5241193, 5241194, 1721790
C07491	CNC(=O)Oc1cccc2ccccc12	63-25-2	Carbaryl, Carbaril	2.2	1875862
C06419	N[C@H](Cc1c[nH]cn1)C(=O)O	351-50-8	D-Histidine, (R)-alpha-Amino-1H-imidazole-4-propionic acid	2.2	84089
C15508	CC1CO1	75-56-9	1,2-Epoxypropane, 1,2-Propylene oxide, Propylene oxide	2.2	79763, 6051628
C05593	O=C(O)Cc1cccc(O)c1	621-37-4	3-Hydroxyphenylacetate, 3-Hydroxyphenylacetic acid	2.32	2086506
C01799	CCC[C@@H](N)C(=O)O	2013-12-09	D-Norvaline, D-2-Aminovaleric acid, D-2-Aminopentanoic acid	2.4	1721161
C03739	O[C@@H]1CCCC[C@H]1O	1460-57-7	trans-1,2-Cyclohexanediol, trans-Cyclohexane-1,2-diol	2.4	3193810, 1901343, 8769641
C11387	CC12CCC(C1)C(C)(C)C2=O	4695-62-9	(1S,4R)-(+)-Fenchone, (+)-Fenchone	2.6	1861492, 3588451, 3588452
C09859	CC12CCC(C1)C(C)(C)C2=O	7787-20-4	Fenchone, (1R,4S)-(-)-Fenchone	2.6	1861492, 3588451, 3588452
C03098	S=C=NCc1ccccc1	622-78-6	Benzyl isothiocyanate	2.8	386135
C03522	CNc1ccc(C(=O)O)cc1	nan	N-Methyl-4-aminobenzoate	2.92	2082805
C14200	CC(C)(C)c1ccc(O)cc1	98-54-4	4-tert-Butylphenol, Butylphen	3	1817334
C14453	Oc1ccc(Br)cc1	106-41-2	4-Bromophenol	3	1680024
C03969	NC1(C(=O)O)CCCC1	52-52-8	1-Aminocyclopentanecarboxylate, 1-Aminocyclopentanecarboxylic acid, Cycloleucine	3.04	636626
C14455	CCNc1ccccc1	103-69-5	N-Ethylaniline, N-Ethylbenzenamine	3.2	507468
C01403	COc1ccccc1	100-66-3	Anisole, Methoxybenzene, Methyl phenyl ether, Phenol methyl ether	3.2	506892, 6591998, 4860760
C20645	COC(=O)c1ccccc1	93-58-3	Methyl benzoate	3.2	1072099, 6593061, 4181087
C15562	NCc1ccccc1	100-46-9	Benzylamine, Benzenemethanamine	3.2	741984
C02299	CNc1ccccc1	100-61-8	N-Methylaniline, N-Methylbenzenamine	3.2	741982
C15220	Cc1ccc(O)c(Cl)c1	6640-27-3	2-Chloro-4-methylphenol, 2-Chloro-p-cresol	3.28	2041488
C08313	Cc1c[nH]c2ccccc12	83-34-1	Skatole, 3-Methylindole	3.68	111296, 6478526
C02356	CC[C@H](N)C(=O)O	nan	(S)-2-Aminobutanoate, (S)-2-Aminobutanoic acid, (S)-2-Aminobutyric acid	4	1720935
C21420	COc1ccc(CO)cc1OC	93-03-8	(3,4-Dimethoxyphenyl)methanol, Veratryl alcohol, 3,4-Dimethoxybenzyl alcohol	4.8	8257724, 9770997, 639388
C21167	Cc1cc(C(=O)O)ccc1O	499-76-3	4-Hydroxy-3-methylbenzoate, 4-Hydroxy-m-toluate	5	2082472
C01073	CC(=O)NCCC(=O)O	3025-95-4	N-Acetyl-beta-alanine	5	1704093
C00156	O=C(O)c1ccc(O)cc1	99-96-7	4-Hydroxybenzoate, Hydroxybenzoic acid, 4-Hydroxybenzoic acid, Hydroxybenzenecarboxylic acid	5	970950, 5933482
C01026	CN(C)CC(=O)O	1118-68-9	N,N-Dimethylglycine, Dimethylglycine	5	1700261
C06343	Oc1ccnc2ccccc12	611-36-9	4-Hydroxyquinoline, Quinolin-4-ol	5	1524969
C19320	Cc1ccc2c(c1N)C(=O)c1ccccc1C2=O	82-28-0	1-Amino-2-methylanthraquinone	5	650595
C01826	CCC[C@H](N)C(=O)O	6600-40-4	L-Norvaline, L-2-Aminovaleric acid, L-2-Aminopentanoic acid, (S)-2-Aminopentanoic acid	5	1721162
C14101	O=C(O)c1ccc2ccccc2c1	93-09-4	2-Naphthoic acid, 2-Naphthalenecarboxylic acid, beta-Naphthoic acid	5	972039
C06415	O=c1ccc2ccccc2[nH]1	59-31-4	2(1H)-Quinolinone, Quinolin-2(1H)-one	6	2855
C03243	O=C1C(=O)c2ccccc2-c2ccccc21	84-11-7	9,10-Phenanthroquinone, 9,10-Phenanthrenedione, Phenanthraquinone, Phenanthrenequinone	6	608838
C00955	OCCc1c[nH]c2ccccc12	526-55-6	Indole-3-ethanol, Tryptophol	6.6	125553
C18620	O=C(O)c1ncccc1O	nan	3-Hydroxypicolinic acid	7	118954
C01842	CCCCC(N)=O	626-97-1	Pentanamide, Valeramide	7	1740792
C00736	NC(CS)C(=O)O	3374-22-9	Cysteine, 2-Amino-3-mercaptopropionic acid	7.6	1721406, 8198862, 4349655, 14384775
C20448	O=C(O)c1ccc(CO)o1	6338-41-6	5-Hydroxymethyl-2-furoate, 5-Hydroxymethyl-2-furoic acid	7.72	121784
C14764	NS(=O)(=O)c1cccs1	6339-87-3	2-Thiophenesulfonamide	8	123537
C03351	OCc1cccc(O)c1	620-24-6	3-Hydroxybenzyl alcohol, 3-Hydroxybenzenemethanol	8	2041500
C06420	N[C@H](Cc1ccc(O)cc1)C(=O)O	556-02-5	D-Tyrosine, (R)-3-(p-Hydroxyphenyl)alanine, (R)-2-Amino-3-(p-hydroxyphenyl)propionic acid	8	2212157
C10787	COc1cccc(OC)c1O	91-10-1	2,6-Dimethoxyphenol, Pyrogallol 1,3-dimethyl ether	8	1526871
C16247	Oc1c(Br)cccc1Br	608-33-3	2,6-Dibromophenol	9	2043614
C00768	NC(Cc1c[nH]cn1)C(=O)O	4998-57-6	Histidine, alpha-Amino-1H-imidazole-4-propionic acid	9	4842048, 8626146, 4232607, 84087
C14309	Oc1ccc2c(c1)CCCC2	1125-78-6	5,6,7,8-Tetrahydro-2-naphthol	9	1101302
C19837	O=C(O)c1c[nH]c2ccccc12	771-50-6	Indole-3-carboxylate, Indole-3-carboxylic acid	9	129435
C01542	Cc1ccccc1O	95-48-7	o-Cresol, 2-Hydroxytoluene, o-Methylphenol	9.6	4245336, 506917
C11217	NC(Cc1ccc(F)cc1)C(=O)O	51-65-0	p-Fluorophenylalanine	10	2938793
C11020	CC(Oc1ccc(Cl)cc1Cl)C(=O)O	120-36-5	2,4-DP, Dichlorprop, 2-(2,4-Dichlorophenoxy)propionic acid	10.6	3203103
C10470	COc1ccc(/C=C/C(=O)O)cc1O	537-73-5	Isoferulic acid	11	2212760
C05582	COc1cc(CC(=O)O)ccc1O	306-08-1	Homovanillate, Homovanillic acid, 3-Methoxy-4-hydroxyphenylacetate	11.4	2213447
C11731	NC(=O)c1cccc(Cl)c1	618-48-4	m-Chlorobenzamide, 3-Chlorobenzamide	12	1859940
C00414	O=C1CCCCC1	108-94-1	Cyclohexanone	13.2	30471998, 385735, 4969244
C06324	O=c1[nH]ccc2ccccc12	491-30-5	Isocarbostyril, 1(2H)-Isoquinolinone, Isoquinolin-1(2H)-one	15	471736
C00408	O=C(O)[C@@H]1CCCCN1	3105-95-1	L-Pipecolate, Pipecolinic acid, Pipecolic acid, 2-Piperidinecarboxylic acid, (S)-Piperidine-2-carboxylic acid	15.8	81093
C01467	Cc1cccc(O)c1	108-39-4	3-Cresol, m-Cresol, 3-Hydroxytoluene, 3-Methylphenol	16	506719, 4244927
C10804	O=C(O)c1ccccc1CO	612-20-4	2-(Hydroxymethyl)benzoic acid, 2-Hydroxymethylbenzoic acid	16	2574900
C14111	O=C(O)c1ccc2c(c1)CCCC2	1131-63-1	5,6,7,8-Tetrahydro-2-naphthoic acid	17	2212302
C18887	CC(C)OC(=O)Nc1ccccc1	122-42-9	Propham	18	2209666
C02735	NCC(O)c1ccccc1	7568-93-6	Phenylethanolamine, 2-Amino-1-phenylethanol	19	971222
C02366	CC1C(=O)Nc2ccccc21	1504-06-9	3-Methyloxindole, 1,3-Dihydro-3-methyl-2H-indol-2-one	19	124187
C14691	CCN(CC)CC	121-44-8	Triethylamine, N,N-Diethylethanamine	19	5238720, 605283
C14527	C=C(C)C(=O)OC	80-62-6	Methyl methacrylate, MMA, Methyl 2-methylpropenoate	19	605459
C17690	CC(O)CCc1ccc(O)cc1	nan	4-(4-Hydroxyphenyl)-2-butanol, 4-HPB, Rhododendrol, Betuligenol	19	2437673
C00511	C=CC(=O)O	79-10-7	Acrylic acid, Propenoate, Acrylate, 2-Propenoic acid, Vinylformic acid	19	635743
C20488	N[C@@H](CC(=O)O)c1ccccc1	nan	D-beta-Phenylalanine, (S)-3-Amino-3-phenylpropanoate	19	3197768
C14270	Oc1cccc(Cl)c1	108-43-0	3-Chlorophenol	19	1634401
C09814	N#Cc1ccccc1	100-47-0	Benzonitrile, Phenyl cyanide, Cyanobenzene	19	506893, 3934079, 4178477
C08276	CSCCC(=O)O	646-01-5	3-(Methylthio)propanoate, 3-(Methylthio)propionic acid, 3-Methylthiopropionate, 3-(Methylsulfanyl)propanoate	19	1743054
C01998	C=CC#N	107-13-1	Acrylonitrile, Propenenitrile, Vinyl cyanide	19	605310
C01950	NC(=O)c1ccccn1	1452-77-3	Picolinamide	20	109617
C00906	CC1CNC(=O)NC1=O	696-04-8	5,6-Dihydrothymine, Dihydrothymine, 5,6-Dihydro-5-methyluracil	20	81983
C18742	Cc1cc(Cl)ccc1OC(C)C(=O)O	93-65-2	Mecoprop	20	2212752
C02376	Cc1c[nH]c(=O)nc1N	554-01-8	5-Methylcytosine	20.4	120387
C03030	O=C(O)c1c[nH]c(=O)[nH]c1=O	23945-44-0	Uracil 5-carboxylate, Uracil 5-carboxylic acid, 5-Carboxyuracil	21.8	141683
C19291	c1ccc(OCC2CO2)cc1	122-60-1	Phenyl glycidyl ether	23	2744
C18853	CN(C)C(=O)Nc1cccc(C(F)(F)F)c1	2164-17-2	Fluometuron	23.4	2217354
C02363	CCOc1cccc(C(=O)O)c1	621-51-2	3-Ethoxybenzoate, 3-Ethoxybenzoic acid	26	509159
C05145	CC(CN)C(=O)O	144-90-1	3-Aminoisobutyric acid, 3-Aminoisobutanoate, 3-Amino-2-methylpropanoate	31.7	1720958
C11180	Cc1cc(C)nc(Nc2ccccc2)n1	53112-28-0	Pyrimethanil	32	151589
C03767	O=C1CCC(C(=O)O)CC1	nan	4-Oxocyclohexanecarboxylate	36	1635956
C06414	O=C(O)c1ccnc2ccccc12	486-74-8	4-Quinolinecarboxylic acid, Quinoline-4-carboxylate, Quinoline-4-carboxylic acid, Cinchonic acid	36	5224
C18817	Cc1ccc(NC(=O)N(C)C)cc1Cl	15545-48-9	Chlorotoluron	40	2647688
C03235	O=C(O)COc1ccc(O)cc1	nan	4-Hydroxypheoxyacetate	45	1952779
C19058	CNC(=O)Nc1nc2ccccc2s1	1929-88-0	Benzthiazuron	50	181259
C06867	C[C@H](CS)C(=O)N1CCC[C@H]1C(=O)O	62571-86-2	Captopril	50	477887, 27470849
C19514	CCCOC(N)=O	627-12-3	n-Propyl carbamate	56	1743059
C13701	CC(Oc1ccc(Cl)cc1)C(=O)O	3307-39-9	2-(4-Chlorophenoxy)propionic acid, 2-(p-Chlorophenoxy)propionic acid, CPP	56	8265209, 1911888, 8263126
C02642	NC(=O)NCCC(=O)O	462-88-4	3-Ureidopropionate, 3-Ureidopropanoate, beta-Ureidopropionic acid, N-Carbamoyl-beta-alanine	60	1705263
C11457	O=C(O)CCc1cccc(O)c1	621-54-5	3-(3-Hydroxyphenyl)propanoic acid, Dihydro-3-coumaric acid, 3-Hydroxyphenylpropanoate, 3-(3-Hydroxyphenyl)propanoate	60	1947445
C06144	C#CCC(=O)O	2345-51-9	3-Butynoate, But-3-ynoate	64.8	27153252, 1739296
C05660	COc1ccc2[nH]cc(CC(=O)O)c2c1	3471-31-6	5-Methoxyindoleacetate, 5-Methoxyindoleacetic acid	68	5442261, 187161
C00429	O=C1CCNC(=O)N1	504-07-4	5,6-Dihydrouracil, Dihydro-2,4(1H,3H)-pyrimidinedione, Dihydrouracile, Dihydrouracil, 5,6-Dihydro-2,4-dihydroxypyrimidine, Hydrouracil, 2,4-Dioxotetrahydropyrimidine	70	112496
C03141	O=C(Nc1ccccc1C(=O)O)c1ccccc1	579-93-1	N-Benzoylanthranilate, 2-Benzoylaminobenzoic acid	80	1115814
C18487	O=C1CCc2cccc3c2N1CC3	57369-32-1	Pyroquilon	84	1455831
C09348	COc1cc2ccncc2cc1OC	15248-39-2	6,7-Dimethoxyisoquinoline, Backebergine	142	129335
C01043	CN(CC(=O)O)C(N)=O	nan	N-Carbamoylsarcosine	154	1766098
C00993	C[C@@H](N)C(=O)N[C@H](C)C(=O)O	923-16-0	D-Alanyl-D-alanine, D-Ala-D-Ala	162	1724814
C22202	O=C(O)CC1C(=O)Nc2ccccc21	2971-31-5	2-Oxoindole-3-acetate, 2-Oxoindole-3-acetic acid, 2-Indolinone-3-acetate, 2-(2-Oxo-1,3-dihydroindol-3-yl)acetate	184	167827
C16623	O=C(O)CNC(=O)c1ccncc1	2015-20-5	Isonicotinylglycine, Isonicotinuric acid	196	154191
C10659	O=c1c2ccccc2nc2n1CCC2	530-53-0	Deoxyvasicinone, 2,3-Trimethylene-4-quinazolone	250	168414
C10963	Cc1[nH]c(=O)n(C(C)(C)C)c(=O)c1Cl	5902-51-2	Terbacil	256	643054
C00815	CC(O)(CC(=O)O)C(=O)O	2306-22-1	Citramalate, Citramalic acid, alpha-Hydroxypyrotartaric acid, 2-Methylmalic acid	270	1723817
C19415	CCOc1ccc(NC(N)=O)cc1	150-69-6	Dulcin, p-Ethoxyphenylurea	285	2096445
C15102	O=C1CCC(C(=O)O)c2ccccc21	nan	1,2,3,4-Tetrahydro-4-oxo-1-naphthoic acid	313	2939263
C13311	O=C1CC[C@H](C(=O)N2CCCCC2)N1	110958-19-5	Fasoracetam, NS 105	321	8488352
C10663	Cn1ccc(=O)c2ccccc21	83-54-5	Echinopsine	327	122247
C11130	O=C1Nc2ccccc2C1O	61-71-2	3-Hydroxyindolin-2-one, 1,3-Dihydro-3-hydroxy-2H-indol-2-one, Dioxindole	345	82628, 7744971, 7744972
C14097	O=C(O)c1cccc(C(=O)O)c1O	606-19-9	2-Hydroxyisophthalic acid, 2-Hydroxy-1,3-benzenedicarboxylic acid	360	2102863
C01188	CC(CO)C(=O)O	2068-83-9	3-Hydroxy-2-methylpropanoate, 3-Hydroxyisobutyrate, 3-Hydroxyisobutyric acid	399	6367552, 6367551, 1745484
C14113	O=C(O)C1CCC2CCCCC2C1	13032-41-2	Decahydro-2-naphthoic acid, Decahydro-2-naphthalenecarboxylic acid	527	3197086
C11504	Cc1[nH]c2ccccc2c(=O)c1O	nan	3-Hydroxy-2-methyl-1H-quinolin-4-one	542	1526966
C05834	CC1(O)C(=O)Nc2ccccc21	nan	3-Methyldioxyindole, 3-Hydroxy-3-methyloxindole	542	10550938, 10555023, 133676
C20687	C[C@H](Oc1ccc(Cl)cc1Cl)C(=O)O	nan	(S)-(2,4-Dichlorophenoxy)propanoate, (S)-Dichlorprop	542	3203102
C11074	O=C(O)C1CCCS1	nan	THTC, 2-n-Tetrahydrothiophenecarboxylic acid	560	109672
C04104	CCC(C)(O)C(O)C(=O)O	nan	2,3-Dihydroxy-3-methylpentanoate, 2,3-Dihydroxy-3-methylvalerate	571	1760163
C00522	CC(C)(CO)[C@@H](O)C(=O)O	470-29-1	(R)-Pantoate, Pantoate, Pantoic acid	571	1722601
C15141	CN(Cc1ccccc1)c1ccccn1	nan	N-(Phenylmethyl)-N-methyl-2-pyridinamine	571	474098
C18722	CN(C)C(=O)C(c1ccccc1)c1ccccc1	957-51-7	Diphenamid	610	2052009
C15419	O=C(O)[C@@H]1C[C@H]1c1ccccc1	939-90-2	trans-2-Phenylcyclopropanecarboxylic acid	714	2045852
C15769	O=C1Nc2ccccc2OC1O	nan	HBOA, 2-Hydroxy-1,4-benzoxazin-3-one, 2-hydroxy-2H-1,4-benzoxazin-3(4H)-one	783	149851
C05843	Cn1ccc(=O)c(C(N)=O)c1	769-49-3	N1-Methyl-4-pyridone-5-carboxamide, "N-Methyl-4-pyridone-5-carboxamide", 1-Methyl-4-pyridone-3-carboximide	857	122528
C02548	NCCc1cc2ccccc2[nH]1	496-42-4	2-(2-Aminoethyl)indole	948	118518
C20803	Cc1cccc2c(C(=O)O)cccc12	nan	5-Methyl-1-naphthoate	971	2362059

## Sheet: Drug molecules
Drug molecules	Name	SMILES	Reaxys molecule ID	KEGG molecule ID	Local molecule ID
D00006	Pyridoxal phosphate hydrate (JP17); Pyridoxal phosphate monohydrate; Hipyridoxin (TN)	Cc1ncc(COP(=O)(O)O)c(C=O)c1O.O	11305661	nan	11305661
D00007	Glutamic acid (USP); L-Glutamic acid (JP17)	NC(CCC(=O)O)C(=O)O	6131105, 1723799, 9906463, 3588482, 3588483, 6899139, 4661739	C00302	4661739, 1723799, 6899139, 3588483, 3588482, 9906463, 6131105
D00009	Glucose (JP17); Purified glucose (JP17); D-Glucose	OCC1OC(O)C(O)C(O)C1O	1907357	C00738	1907357
D00012	Alanine (USP); L-Alanine (JP17)	CC(N)C(=O)O	8253586, 4290722, 13170314, 8137711, 4653390, 5238665, 5238664, 635807, 3587354	C01401	635807, 5238665, 5238664, 4290722, 4653390, 8253586, 13170314, 3587354, 8137711
D00013	Aspartic acid (USP/INN); L-Aspartic acid (JP17)	NC(CC(=O)O)C(=O)O	13196518, 774618, 5246122, 6131048, 4230581	C16433	6131048, 4230581, 13196518, 774618, 5246122
D00014	Glutathione (JP17); Glutathione (reduced type); Tathion (TN)	NC(CCC(=O)NC(CS)C(=O)NCC(=O)O)C(=O)O	19238644, 19238646, 1729811	nan	1729811, 19238644, 19238646
D00015	Glutamine (USP); L-Glutamine (JP17); Levoglutamide; Endari (TN); Nutrestore (TN)	NC(=O)CCC(N)C(=O)O	1723795, 6131104	C00303	6131104, 1723795
D00016	Serine (USP); L-Serine (JP17)	NC(CO)C(=O)O	3587640, 8309496, 6130745, 13179721, 1721402	C00716	3587640, 1721402, 6130745, 8309496, 13179721
D00018	Ascorbic acid (JP17/USP/INN); Ascoltin (TN); Ascorbicap (TN); ASCOR (TN)	O=C1OC(C(O)CO)C(O)=C1O	16820046, 18196975, 84270, 4678197	nan	18196975, 84270, 16820046, 4678197
D00019	Methionine (USP); L-Methionine (JP17); L-Methionine Z (TN)	CSCCC(N)C(=O)O	636185, 8622104, 4657270, 4657271, 4230170	C01733	636185, 8622104, 4657270, 4657271, 4230170
D00020	Tryptophan (USP/INN); L-Tryptophan (JP17)	NC(Cc1c[nH]c2ccccc12)C(=O)O	29116218, 4686567, 86196, 489608, 6481877, 3591959, 3591960	C00806	3591959, 4686567, 86196, 489608, 3591960, 29116218, 6481877
D00021	Phenylalanine (USP/INN); L-Phenylalanine (JP17)	NC(Cc1ccccc1)C(=O)O	3589441, 3589442, 4669367, 10535193, 1910407, 6767804, 8256685, 4669366	C02057	4669367, 8256685, 4669366, 1910407, 3589442, 3589441, 6767804, 10535193
D00022	Tyrosine (USP/INN); L-Tyrosine (JP17)	NC(Cc1ccc(O)cc1)C(=O)O	4675158, 6131731, 4675159, 515881, 8259543, 8630624	C01536	8259543, 8630624, 6131731, 4675158, 515881, 4675159
D00025	Sucrose (JP17/NF); White soft sugar (JP17); Sugar, compressible (NF); Sugar, confectioner's (NF); Sugar spheres (NF); Sucrose, purified; Sucrose (TN)	OCC1OC(OC2(CO)OC(CO)C(O)C2O)C(O)C(O)C1O	11343410	nan	11343410
D00026	L-Cysteine (JP17); Ecolan (TN)	NC(CS)C(=O)O	1721406, 8198862, 4349655, 14384775	C00736	1721406, 8198862, 4349655, 14384775
D00027	Uracil (JAN/USAN)	O=c1cc[nH]c(=O)[nH]1	6386808, 7636151, 879405, 606623	C00106	879405, 606623, 6386808, 7636151
D00029	Biotin (JP17/USP/INN); Bioepiderm (TN)	O=C(O)CCCCC1SCC2NC(=O)NC21	10016727, 212836, 19684652	nan	19684652, 10016727, 212836
D00030	Leucine (USP); L-Leucine (JP17)	CC(C)CC(N)C(=O)O	636005, 4291051, 4230050, 8254243, 4656081	C16439	4291051, 4230050, 636005, 4656081, 8254243
D00031	Oxiglutatione (JAN/INN); Glutathione (TN)	NC(CCC(=O)NC(CSSCC(NC(=O)CCC(N)C(=O)O)C(=O)NCC(=O)O)C(=O)NCC(=O)O)C(=O)O	1718699	nan	1718699
D00032	Histidine (USP/INN); L-Histidine (JP17)	NC(Cc1c[nH]cn1)C(=O)O	4842048, 8626146, 4232607, 84087	C00768	8626146, 4232607, 4842048, 84087
D00034	Adenine (JAN/USP); Leucon (TN)	Nc1ncnc2[nH]cnc12	608603, 6403070	C00147	608603, 6403070
D00035	Proline (USP); L-Proline (JP17)	O=C(O)C1CCCN1	8479425, 4658737, 80809, 3588099, 4903975, 5244083, 8479424	C16435	80809, 8479424, 4903975, 5244083, 3588099, 8479425, 4658737
D00036	Niacinamide (USP); Nicotinamide (JP17/INN)	NC(=O)c1cccnc1	383619	C00153	383619
D00037	Citric acid, anhydrous (USP); Anhydrous citric acid (JP17); Citric acid anhydrous (JAN)	O=C(O)CC(O)(CC(=O)O)C(=O)O	782061	C00158	782061
D00038	Benzoic acid (JP17/USP); Benzoic acid (TN)	O=C(O)c1ccccc1	636131	C00180, C00539	636131
D00039	Valine (USP); L-Valine (JP17)	CC(C)C(N)C(=O)O	4229953, 8253832, 4654966, 6130713, 506689	C16436	8253832, 6130713, 4654966, 4229953, 506689
D00040	Cholesterol (JP17/NF); Cholesterol (TN)	CC(C)CCCC(C)C1CCC2C3CC=C4CC(O)CCC4(C)C3CCC12C	1915876, 17659713	nan	17659713, 1915876
D00041	Threonine (USP); L-Threonine (JP17)	CC(O)C(N)C(=O)O	20316645, 8984732, 3587731, 1098902	nan	3587731, 20316645, 8984732, 1098902
D00043	Isoflurophate; Fluostigmine; Floropryl (TN)	CC(C)OP(=O)(F)OC(C)C	1723307	C00202	1723307
D00044	Maltose (NF); Madoros (TN)	OCC1OC(OC2C(CO)OC(O)C(O)C2O)C(O)C(O)C1O	1351180, 17696136, 16892417, 16988645	nan	16988645, 16892417, 1351180, 17696136
D00045	Adenosine (JAN/USP); Adenocard (TN); Adenoscan (TN)	Nc1ncnc2c1ncn2C1OC(CO)C(O)C1O	1224871	nan	1224871
D00046	Anhydrous lactose (JP17); Lactose, anhydrous (JAN/NF); Lactose (TN)	OCC1OC(OC2C(CO)OC(O)C(O)C2O)C(O)C(O)C1O	1351180, 17696136, 16892417, 16988645	nan	16988645, 16892417, 1351180, 17696136
D00047	Taurine (JP17/USP/INN); Aminoethylsulfonic acid (JAN); Taurine (TN)	NCCS(=O)(=O)O	1751215	C00245	1751215
D00048	Thioctic acid amide (JAN); Lipoamide	NC(=O)CCCCC1CCSS1	18180502, 122470	C00248	122470, 18180502
D00049	Niacin (USP); Nicotinic acid (JP17/INN); Niacor (TN); Niaspan (TN)	O=C(O)c1cccnc1	109591	C00253	109591
D00050	Riboflavin (JP17/USP/INN); Bisulase (TN)	Cc1cc2nc3c(=O)[nH]c(=O)nc-3n(CC(O)C(O)C(O)CO)c2cc1C	631184	nan	631184
D00051	Androstenedione (JAN)	CC12CCC3C(CCC4=CC(=O)CCC43C)C1CCC2=O	1915560	nan	1915560
D00052	Edetic acid (NF/INN); EDTA; Versene acid (TN)	O=C(O)CN(CCN(CC(=O)O)CC(=O)O)CC(=O)O	1716295	C00284	1716295
D00054	Inosine (JAN/INN); Inotin (TN)	O=c1[nH]cnc2c1ncn2C1OC(CO)C(O)C1O	1224910	nan	1224910
D00055	Orotic acid (JAN)	O=C(O)c1cc(=O)[nH]c(=O)[nH]1	383901	C00295	383901
D00058	gamma-Aminobutyric acid (JAN); Gammalon (TN)	NCCCC(=O)O	31897116, 906818	C00334	906818, 31897116
D00059	Levodopa (JP17/USP/INN); Dopar (TN)	NC(Cc1ccc(O)c(O)c1)C(=O)O	1462084, 3651636	nan	3651636, 1462084
D00061	Xylitol (JP17/NF); Klinit (TN)	OCC(O)C(O)C(O)CO	1902256	nan	1902256
D00062	Mannitol (USP); D-Mannitol (JP17); Osmitrol (TN); Tobrex (TN); Bronchitol (TN)	OCC(O)C(O)C(O)C(O)CO	8496933	nan	8496933
D00063	Tobramycin (JP17/USP); TOB; Tobi (TN); Tobracin (TN); Tobrex (TN); Bethkis (TN)	NCC1OC(OC2C(N)CC(N)C(OC3OC(CO)C(O)C(N)C3O)C2O)C(N)CC1O	12973447	nan	12973447
D00064	l-Menthol (JP17); Levomenthol; l-Menthol (TN)	CC1CCC(C(C)C)C(O)C1	5726576, 1902288, 4653905, 5726578, 8144597, 20394954, 4349492, 10674752, 10079766	nan	20394954, 4349492, 10674752, 10079766, 5726576, 8144597, 1902288, 4653905, 5726578
D00065	Isoleucine (USP); L-Isoleucine (JP17)	CCC(C)C(N)C(=O)O	20368482, 20316644, 28220025, 5241193, 5241194, 1721790	C16434	1721790, 5241193, 28220025, 20316644, 5241194, 20368482
D00066	Progesterone (JP17/USP/INN); Crinone (TN); Prometrium (TN)	CC(=O)C1CCC2C3CCC4=CC(=O)CCC4(C)C3CCC12C	1915947	nan	1915947
D00067	Estrone (JAN/USP/INN); Estrone (TN)	CC12CCC3c4ccc(O)cc4CCC3C1CCC2=O	1915075	nan	1915075
D00070	Folic acid (JP17/USP/INN); Folicet (TN)	Nc1nc2ncc(CNc3ccc(C(=O)NC(CCC(=O)O)C(=O)O)cc3)nc2c(=O)[nH]1	100782, 8955802	nan	8955802, 100782
D00073	Hydroquinone (USP); Eldoquin (TN)	Oc1ccc(O)cc1	16942237, 605970, 4245811, 16942238	C00530, C15603	16942237, 605970, 16942238, 4245811
D00075	Testosterone (JAN/USP); Androderm (TN); Androgel (TN); Axiron (TN); Striant (TN); Testim (TN)	CC12CCC(=O)C=C1CCC1C2CCC2(C)C(O)CCC12	1915394	nan	1915394
D00076	Noradrenaline (JP17); Norepinephrine (INN); Nor adrenalin (TN)	NCC(O)c1ccc(O)c(O)c1	2210994	nan	2210994
D00077	Benzyl alcohol (JP17/NF/INN); Ulesfia (TN)	OCc1ccccc1	878307	C00556, C03485	878307
D00081	Dinoprost (JP17/USAN/INN); Prosmon (TN)	CCCCCC(O)C=CC1C(O)CC(O)C1CC=CCCCC(=O)O	2706863	nan	2706863
D00086	Thioctic acid (JAN); Thiotomin (TN)	O=C(O)CCCCC1CCSS1	5249919, 5531028, 17644339, 81853, 5249920	C00725	5249920, 17644339, 5531028, 81853, 5249919
D00088	Hydrocortisone (JP17/USP/INN); HC; Acticort (TN); Anusol HC (TN); Colocort (TN); Cortef (TN); Hytone (TN); Plenadren (TN)	CC12CCC(=O)C=C1CCC1C2C(O)CC2(C)C1CCC2(O)C(=O)CO	2340333	nan	2340333
D00089	Oxytocin (JP17/USP/INN); Oxytocin (TN); Pitocin (TN); Syntocinon (TN)	CCC(C)C1NC(=O)C(Cc2ccc(O)cc2)NC(=O)C(N)CSSCC(C(=O)N2CCCC2C(=O)NC(CC(C)C)C(=O)NCC(N)=O)NC(=O)C(CC(N)=O)NC(=O)C(CCC(N)=O)NC1=O	17516222	nan	17516222
D00091	Vanillin (NF)	COc1cc(C=O)ccc1O	472792	C00755	472792
D00094	Tretinoin (JAN/USP/INN); Avita (TN); Renova (TN); Retin A (TN); Tretinoin (TN)	CC(C=CC1=C(C)CCCC1(C)C)=CC=CC(C)=CC(=O)O	2508066	nan	2508066
D00095	Epinephrine (USP/INN); Adrenaline (JP17); Adrenalin (TN); Auvi-q (TN); Epipen (TN)	CNCC(O)c1ccc(O)c(O)c1	4783242, 2212160, 4783241	nan	4783242, 4783241, 2212160
D00096	Sorbitol solution (USP); D-Sorbitol (JP17); Sorbitol (NF); Sorbitol 3% in plastic container (TN)	OCC(O)C(O)C(O)C(O)CO	8496933	nan	8496933
D00097	Salicylic acid (JP17/USP); Salicylic acid (TN)	O=C(O)c1ccccc1O	774890, 11116623	C00805	11116623, 774890
D00098	Camphor (USP); dl-Camphor (JP17)	CC12CCC(CC1=O)C2(C)C	6475829, 27143556, 3588456, 1907611	C00809, C18369	6475829, 3588456, 1907611, 27143556
D00099	Cetanol (JP17); Cetyl alcohol (NF); Cetanol (TN)	CCCCCCCCCCCCCCCCO	1748475	C00823	1748475
D00100	Menatetrenone (JP17/INN); Vitamin K2 (TN)	CC(C)=CCCC(C)=CCCC(C)=CCCC(C)=CCC1=C(C)C(=O)c2ccccc2C1=O	2340566	nan	2340566
D00102	Nitrous oxide (JP17/USP); Nitrous oxide (TN)	[N-]=[N+]=O	nan	C00887	C00887
D00103	Tartaric acid (JP17/NF); Tartaric acid (TN)	O=C(O)C(O)C(O)C(=O)O	6054870, 13198616, 12348102, 510169, 11555556, 6477036, 8691902, 19242909, 11738977, 13200609, 3589120	nan	13198616, 6477036, 11555556, 6054870, 8691902, 510169, 19242909, 12348102, 13200609, 11738977, 3589120
D00104	Chloramphenicol (JP17/USP/INN); CP; Amphicol (TN); Chloromycetin (TN); Econochlor (TN)	O=C(NC(CO)C(O)c1ccc([N+](=O)[O-])cc1)C(Cl)Cl	6071049, 2063328	nan	2063328, 6071049
D00105	Estradiol (JAN/USP/INN); Climara (TN); Divigel (TN); Estrace (TN); Estraderm (TN); Estrasorb (TN); Estring (TN); Estrogel (TN); Innofem (TN); Vagifem (TN); Vivelle (TN)	CC12CCC3c4ccc(O)cc4CCC3C1CCC2O	2055276	nan	2055276
D00109	Aspirin (JP17/USP); Aspalon (JAN); Acetylsalicylic acid; Easprin (TN); Durlaza (TN)	CC(=O)Oc1ccccc1C(=O)O	779271	C01405	779271
D00110	Cocaine (USP); Cocaine (TN)	COC(=O)C1C(OC(=O)c2ccccc2)CC2CCC1N2C	91032	nan	91032
D00111	Lactic acid (JP17/USP); Lactate (TN)	CC(O)C(=O)O	5376169, 5238667, 4653396, 1209341, 9254479	C01432	4653396, 9254479, 1209341, 5376169, 5238667
D00113	Atropine (USP); Atropen (TN)	CN1C2CCC1CC(OC(=O)C(CO)c1ccccc1)C2	91256	nan	91256
D00114	Fructose (JP17/USP); D-Fructose; Fructon (TN)	O=C(CO)C(O)C(O)C(O)CO	2207947, 24040533	nan	2207947, 24040533
D00117	Guaiacol (JAN); Creodon (TN)	COc1ccccc1O	508112	C01502, C15572	508112
D00118	Naproxen (JP17/USP/INN); Naprosyn (TN)	COc1ccc2cc(C(C)C(=O)O)ccc2c1	4233183, 2114551, 6480582	nan	2114551, 4233183, 6480582
D00119	Stearic acid (JP17/NF); Stearic acid (TN)	CCCCCCCCCCCCCCCCCC(=O)O	608585	C01530	608585
D00120	Sulindac (JP17/USP/INN); Clinoril (TN)	CC1=C(CC(=O)O)c2cc(F)ccc2C1=Cc1ccc(S(C)=O)cc1	3006217	nan	3006217
D00121	Allantoin (JAN/USP)	NC(=O)NC1NC(=O)NC1=O	83514	C01551	83514
D00124	Ephedrine (USP); Ephedrine (TN)	CNC(C)C(O)c1ccccc1	3589092, 972533, 3589093, 10534824, 4666695, 4350895, 8151436, 4666696	nan	3589093, 8151436, 3589092, 10534824, 4350895, 4666696, 972533, 4666695
D00126	Ibuprofen (JP17/USP/INN); Advil (TN); Motrin (TN)	CC(C)Cc1ccc(C(C)C(=O)O)cc1	8697997, 26616912, 2049713	C01588	2049713, 8697997, 26616912
D00127	Piroxicam (JP17/USP/INN); Feldene (TN)	CN1C(C(=O)Nc2ccccn2)=C(O)c2ccccc2S1(=O)=O	627692	C01608	627692
D00130	Diflunisal (JAN/USP/INN); Dolobid (TN)	O=C(O)c1cc(-c2ccc(F)cc2F)ccc1O	2654431	C01691	2654431
D00131	Disulfiram (JP17/USP/INN); Antabuse (TN)	CCN(CC)C(=S)SSC(=S)N(CC)CC	1712560	C01692	1712560
D00132	Ketoprofen (JP17/USP/INN); Orudis (TN)	CC(C(=O)O)c1cccc(C(=O)c2ccccc2)c1	2216071, 6481691	C01716	6481691, 2216071
D00133	Resorcinol (USP); Resorcin (JAN); Resorcin (TN)	Oc1cccc(O)c1	9259449, 906905	C01751	906905, 9259449
D00134	Albendazole (JAN/USP/INN); Albenza (TN)	CCCSc1ccc2[nH]c(NC(=O)OC)nc2c1	752696	C01779	752696
D00136	Haloperidol (JP17/USP/INN); Haldol (TN)	O=C(CCCN1CCC(O)(c2ccc(Cl)cc2)CC1)c1ccc(F)cc1	331267	C01814	331267
D00138	Scopolamine (INN); Transderm scop (TN)	CN1C2CC(OC(=O)C(CO)c3ccccc3)CC1C1OC12	91903	nan	91903
D00139	Methoxsalen (JP17/USP); Oxsoralen (TN); UVADEX (TN)	COc1c2occc2cc2ccc(=O)oc12	7880550, 196453	C01864	196453, 7880550
D00140	Erythromycin (JP17/USP/INN); EM; Akne-mycin (TN); Eryc (TN); Erygel (TN); Pce (TN); Staticin (TN); T-stat (TN)	CCC1OC(=O)C(C)C(OC2CC(C)(OC)C(O)C(C)O2)C(C)C(OC2OC(C)CC(N(C)C)C2O)C(C)(O)CC(C)C(=O)C(C)C(O)C1(C)O	1279633	nan	1279633
D00141	Indomethacin (USP); Indometacin (JP17/INN); Aconip (TN); Indocin (TN)	COc1ccc2c(c1)c(CC(=O)O)c(C)n2C(=O)c1ccc(Cl)cc1	497341	C01926	497341
D00142	Methotrexate (JP17/USP/INN); Otrexup (TN); Xatmep (TN)	CN(Cc1cnc2nc(N)nc(N)c2n1)c1ccc(C(=O)NC(CCC(=O)O)C(=O)O)cc1	4219876	nan	4219876
D00143	Pregnenolone (JAN/INN)	CC(=O)C1CCC2C3CC=C4CC(O)CCC4(C)C3CCC12C	1915502	nan	1915502
D00144	Pyrazinamide (JP17/USP/INN); Pyrazinamide (TN)	NC(=O)c1cnccn1	112306	C01956	112306
D00145	Trimethoprim (JAN/USP/INN); Proloprim (TN); Trimpex (TN)	COc1cc(Cc2cnc(N)nc2N)cc(OC)c1OC	625127	C01965	625127
D00147	Hyoscyamine (USP)	CN1C2CCC1CC(OC(=O)C(CO)c1ccccc1)C2	91256	nan	91256
D00148	Phytonadione (JP17/USP); Phytomenadione (INN); Mephyton (TN); Vitamin K1 (TN)	CC(=CCC1=C(C)C(=O)c2ccccc2C1=O)CCCC(C)CCCC(C)CCCC(C)C	1916363	nan	1916363
D00149	Parachlorophenol (JAN/USP); p-Chlorophenol	Oc1ccc(Cl)cc1	507004	C02124	507004
D00151	Mefenamic acid (JP17/USP/INN); Ponstel (TN)	Cc1cccc(Nc2ccccc2C(=O)O)c1C	2216243	C02168	2216243
D00152	Phloroglucinol (JAN); Dilospan S (TN)	Oc1cc(O)cc(O)c1	1341907	C02183	1341907
D00154	Santonin (JP17); Santonin (TN)	CC1=C2C3OC(=O)C(C)C3CCC2(C)C=CC1=O	384821	nan	384821
D00156	Glycyrrhetinic acid (JAN); Enoxolone (INN); Hidermart (TN)	CC1(C(=O)O)CCC2(C)CCC3(C)C(=CC(=O)C4C5(C)CCC(O)C(C)(C)C5CCC43C)C2C1	3041142	nan	3041142
D00159	Frentizole (USAN/INN)	COc1ccc2nc(NC(=O)Nc3ccccc3)sc2c1	1142975	nan	1142975
D00160	Aminocaproic acid (USP/INN); Epsilon-Aminocaproic acid (JAN); Amicar (TN)	NCCCCCC(=O)O	906872	C02378	906872
D00162	Aminosalicylic acid (USP); Pamisyl (TN); Paser (TN)	Nc1ccc(C(=O)O)c(O)c1	473071	C02518	473071
D00163	Chenodiol (USAN); Chenodeoxycholic acid (JP17/INN); Chenix (TN)	CC(CCC(=O)O)C1CCC2C3C(O)CC4CC(O)CCC4(C)C3CCC12C	18809630	nan	18809630
D00168	Cytarabine (JP17/USP/INN); ARA-C; Depocyt (TN)	Nc1ccn(C2OC(CO)C(O)C2O)c(=O)n1	753984	nan	753984
D00169	Meclofenamate sodium (USP); Meclofenamate sodium monohydrate; Meclomen (TN)	Cc1ccc(Cl)c(Nc2ccccc2C(=O)[O-])c1Cl.O.[Na+]	14619562	nan	14619562
D00170	Hymecromone (JP17/USAN/INN); Cantabiline (TN)	Cc1cc(=O)oc2cc(O)ccc12	142217	C03081	142217
D00174	gamma-Amino-beta-hydroxybutyric acid (JAN)	NCC(O)CC(=O)O	1721708	C03678	1721708
D00175	L-Carbocisteine (JP17); Mucodyne (TN)	NC(CSCC(=O)O)C(=O)O	2046034	nan	2046034
D00177	Methylmethionine sulfonium chloride (JAN); L-Methylmethionine sulfonium chloride; Cabagin U (TN)	C[S+](C)CCC(N)C(=O)O.[Cl-]	4163617	nan	4163617
D00178	Octopamine hydrochloride (JAN)	Cl.NCC(O)c1ccc(O)cc1	28570149, 6074418, 3915414	nan	28570149, 3915414, 6074418
D00179	Androstenediol (JAN); Tetrabol (TN)	CC12CCC(O)CC1=CCC1C2CCC2(C)C(O)CCC12	2056311	nan	2056311
D00183	Nalidixic acid (JP17/USP/INN); NA; NegGram (TN)	CCn1cc(C(=O)O)c(=O)c2ccc(C)nc21	750515	C05079	750515
D00186	Ciprofloxacin (JP17/USP/INN); CPFX; Cipro (TN)	O=C(O)c1cn(C2CC2)c2cc(N3CCNCC3)c(F)cc2c1=O	27622965, 3568352	C05349	27622965, 3568352
D00192	Phenylethyl alcohol (USP)	OCCc1ccccc1	1905732	C05853	1905732
D00193	Dexpanthenol (USP/INN); Panthenol (JAN); Ilopan (TN)	CC(C)(CO)C(O)C(=O)NCCCO	1724945	nan	1724945
D00194	d-Limonene (JAN); Limonene	C=C(C)C1CC=C(C)CC1	4291143, 4291144, 774123, 3587824, 8139548	C06078	8139548, 3587824, 774123, 4291143, 4291144
D00196	Physostigmine (USP); Eserine (TN)	CNC(=O)Oc1ccc2c(c1)C1(C)CCN(C)C1N2C	284615	nan	284615
D00201	Tetracycline (JAN/USP/INN); TC; Sumycin (TN)	CN(C)C1C(O)=C(C(N)=O)C(=O)C2(O)C(O)=C3C(=O)c4c(O)cccc4C(C)(O)C3CC12	465987	nan	465987
D00203	Amphotericin B (JP17/USP/INN); AMPH-B; Ambisome (TN); Amphotec (TN); Fungizone (TN)	CC1C=CC=CC=CC=CC=CC=CC=CC(OC2OC(C)C(O)C(N)C2O)CC2OC(O)(CC(O)CC(O)C(O)CCC(O)CC(O)CC(=O)OC(C)C(C)C1O)CC(O)C2C(=O)O	18057769	nan	18057769
D00204	Ampicillin (USP/INN); Anhydrous ampicillin (JP17); ABPC; Omnipen (TN)	CC1(C)SC2C(NC(=O)C(N)c3ccccc3)C(=O)N2C1C(=O)O	629177	nan	629177
D00208	Mitomycin (USP/INN); Mitomycin C (JP17); MMC; Mitomycin (TN); Muamycin (TN)	COC12C(COC(N)=O)C3=C(C(=O)C(C)=C(N)C3=O)N1CC1NC12	630306	nan	630306
D00210	Norfloxacin (JP17/USP/INN); NFLX; Noroxin (TN)	CCn1cc(C(=O)O)c(=O)c2cc(F)c(N3CCNCC3)cc21	567897	C06687	567897
D00214	Dactinomycin (USP); Actinomycin D (JP17); Cosmegen (TN)	Cc1c2oc3c(C)ccc(C(=O)NC4C(=O)NC(C(C)C)C(=O)N5CCCC5C(=O)N(C)CC(=O)N(C)C(C(C)C)C(=O)OC4C)c3nc-2c(C(=O)NC2C(=O)NC(C(C)C)C(=O)N3CCCC3C(=O)N(C)CC(=O)N(C)C(C(C)C)C(=O)OC2C)c(N)c1=O	nan	C06770	C06770
D00215	Trolamine (NF); Mobisy (TN)	OCCN(CCO)CCO	1699263	C06771	1699263
D00217	Acetaminophen (JP17/USP); Paracetamol (INN); Tylenol (TN)	CC(=O)Nc1ccc(O)cc1	27422539, 2208089	C06804	27422539, 2208089
D00218	Acetazolamide (JP17/USP/INN); Diamox (TN)	CC(=O)Nc1nnc(S(N)(=O)=O)s1	212994	C06805	212994
D00219	Acetohexamide (JP17/USP/INN); Dymelor (TN)	CC(=O)c1ccc(S(=O)(=O)NC(=O)NC2CCCCC2)cc1	2225115	C06806	2225115
D00221	Acetylcysteine (JP17/USP/INN); Mucomyst (TN)	CC(=O)NC(CS)C(=O)O	1863930, 4307381, 8140565	nan	4307381, 8140565, 1863930
D00222	Acyclovir (USP); Aciclovir (JP17/INN); Sitavig (TN); Zovirax (TN)	Nc1nc2c(ncn2COCCO)c(=O)[nH]1	1219402	C06810	1219402
D00224	Allopurinol (JP17/USP/INN); Zyloprim (TN)	Oc1ncnc2[nH]ncc12	608611	nan	608611
D00225	Alprazolam (JP17/USP/INN); Xanax (TN)	Cc1nnc2n1-c1ccc(Cl)cc1C(c1ccccc1)=NC2	1223125	C06817	1223125
D00228	Amoxapine (JP17/USP/INN); Asendin (TN)	Clc1ccc2c(c1)C(N1CCNCC1)=Nc1ccccc1O2	832057	nan	832057
D00231	Inamrinone (USP); Amrinone (JAN/INN); Amcoral (TN)	Nc1cc(-c2ccncc2)c[nH]c1=O	744819	nan	744819
D00233	Anthralin (USP); Dithranol (INN); Anthraderm (TN)	O=C1c2c(O)cccc2Cc2cccc(O)c21	2054360	C06831	2054360
D00234	Astemizole (JAN/USP/INN); Hismanal (TN)	COc1ccc(CCN2CCC(Nc3nc4ccccc4n3Cc3ccc(F)cc3)CC2)cc1	4830190	C06832	4830190
D00235	Atenolol (JP17/USP/INN); Tenormin (TN)	CC(C)NCC(O)COc1ccc(CC(N)=O)cc1	2739235	nan	2739235
D00236	Atovaquone (JAN/USP/INN); Mepron (TN)	O=C1C(O)=C(C2CCC(c3ccc(Cl)cc3)CC2)C(=O)c2ccccc21	18303588, 8808444, 13250021	nan	8808444, 13250021, 18303588
D00238	Azathioprine (JP17/USP/INN); Azasan (TN); Imuran (TN)	Cn1cnc([N+](=O)[O-])c1Sc1ncnc2nc[nH]c12	1225351	C06837	1225351
D00241	Baclofen (JP17/USP/INN); Kemstro (TN); Lioresal (TN)	NCC(CC(=O)O)c1ccc(Cl)cc1	2104494	nan	2104494
D00243	Benzquinamide (USAN)	CCN(CC)C(=O)C1CN2CCc3cc(OC)c(OC)cc3C2CC1OC(C)=O	502385	nan	502385
D00244	Betamethasone (JP17/USP/INN); Celestone (TN); Rinderon (TN)	CC1CC2C3CCC4=CC(=O)C=CC4(C)C3(F)C(O)CC2(C)C1(O)C(=O)CO	2341697	nan	2341697
D00245	Bisacodyl (JP17/USP/INN); Dulcolax (TN)	CC(=O)Oc1ccc(C(c2ccc(OC(C)=O)cc2)c2ccccn2)cc1	323727	nan	323727
D00247	Bumetanide (JP17/USP/INN); Bumex (TN)	CCCCNc1cc(C(=O)O)cc(S(N)(=O)=O)c1Oc1ccccc1	2185351	nan	2185351
D00248	Busulfan (JP17/USP/INN); Myleran (TN)	CS(=O)(=O)OCCCCOS(C)(=O)=O	1791786	C06862	1791786
D00249	Calcitonin salmon (JP17/USP/INN); Salmon calcitonin; Calcimar (TN); Fortical (TN); Miacalcin (TN)	CC(C)CC(NC(=O)C(CCCCN)NC(=O)CNC(=O)C(CC(C)C)NC(=O)C(NC(=O)C1CSSCC(N)C(=O)NC(CO)C(=O)NC(CC(N)=O)C(=O)NC(CC(C)C)C(=O)NC(CO)C(=O)NC(C(C)O)C(=O)N1)C(C)C)C(=O)NC(CO)C(=O)NC(CCC(N)=O)C(=O)NC(CCC(=O)O)C(=O)NC(CC(C)C)C(=O)NC(Cc1cnc[nH]1)C(=O)NC(CCCCN)C(=O)NC(CC(C)C)C(=O)NC(CCC(N)=O)C(=O)NC(C(=O)NC(Cc1ccc(O)cc1)C(=O)N1CCCC1C(=O)NC(CCCNC(=N)N)C(=O)NC(C(=O)NC(CC(N)=O)C(=O)NC(C(=O)NCC(=O)NC(CO)C(=O)NCC(=O)NC…	nan	C06865	C06865
D00250	Capsaicin (JAN/USP); Zostrix (TN)	COc1cc(CNC(=O)CCCCC=CC(C)C)ccc1O	2816483	nan	2816483
D00251	Captopril (JP17/USP/INN); Apopril (TN); Capoten (TN)	CC(CS)C(=O)N1CCCC1C(=O)O	3651421	nan	3651421
D00252	Carbamazepine (JP17/USP/INN); Equetro (TN); Tegretol (TN)	NC(=O)N1c2ccccc2C=Cc2ccccc21	1246090	C06868	1246090
D00254	Carmustine (JAN/USP/INN); Bicnu (TN); Gliadel (TN)	O=NN(CCCl)C(=O)NCCCl	2049744	C06873	2049744
D00255	Carvedilol (JP17/USP/INN); Artist (TN); Coreg (TN)	COc1ccccc1OCCNCC(O)COc1cccc2[nH]c3ccccc3c12	1514452	C06875	1514452
D00257	Cefadroxil (JP17); CDX; Sumacef (TN)	CC1=C(C(=O)O)N2C(=O)C(NC(=O)C(N)c3ccc(O)cc3)C2SC1	631667	nan	631667
D00259	Ceforanide (USP/INN); Precef (TN)	NCc1ccccc1CC(=O)NC1C(=O)N2C(C(=O)O)=C(CSc3nnnn3CC(=O)O)CSC12	1201137	nan	1201137
D00263	Cefalexin (JP17); Cephalexin; CEX; Keflex (TN)	CC1=C(C(=O)O)N2C(=O)C(NC(=O)C(N)c3ccccc3)C2SC1	630107	nan	630107
D00264	Cephradine (USP); Cefradine (JAN/INN); CED; Anspor (TN); Velosef (TN)	CC1=C(C(=O)O)N2C(=O)C(NC(=O)C(N)C3=CCC=CC3)C2SC1	630803	nan	630803
D00265	Chloral hydrate (JP17/USP); Noctec (TN)	OC(O)C(Cl)(Cl)Cl	1698497	C06899	1698497
D00266	Chlorambucil (JAN/USP/INN); Leukeran (TN)	O=C(O)CCCc1ccc(N(CCCl)CCCl)cc1	999011	C06900	999011
D00267	Chlordiazepoxide (JP17/USP/INN); Libritabs (TN)	CNC1=Nc2ccc(Cl)cc2C(c2ccccc2)=[N+]([O-])C1	550356	nan	550356
D00268	Chlormezanone (JAN/INN); Trancopal (TN)	CN1C(=O)CCS(=O)(=O)C1c1ccc(Cl)cc1	23033, 4693776, 4693777	nan	4693777, 4693776, 23033
D00269	Chlorotrianisene (INN); TACE (TN)	COc1ccc(C(Cl)=C(c2ccc(OC)cc2)c2ccc(OC)cc2)cc1	1891845	nan	1891845
D00270	Chlorpromazine (USP/INN); Thorazine (TN)	CN(C)CCCN1c2ccccc2Sc2ccc(Cl)cc21	576377, 289793	C06906	289793, 576377
D00271	Chlorpropamide (JP17/USP/INN); Diabinese (TN)	CCCNC(=O)NS(=O)(=O)c1ccc(Cl)cc1	2218363	nan	2218363
D00272	Chlorthalidone (USP); Chlortalidone (JAN/INN); Hygroton (TN); Thalitone (TN)	NS(=O)(=O)c1cc(C2(O)NC(=O)c3ccccc32)ccc1Cl	6070196, 312295, 6070195	nan	312295, 6070195, 6070196
D00274	Cisapride (USP/INN)	COc1cc(N)c(Cl)cc1C(=O)NC1CCN(CCCOc2ccc(F)cc2)CC1OC	8177190, 5459255	C06910	5459255, 8177190
D00275	Cisplatin (JP17/USP/INN); Platinol (TN)	Cl[Pt]Cl.N.N	nan	C06911	C06911
D00278	Clofazimine (JAN/USP/INN); Lamprene (TN)	CC(C)N=c1cc2n(-c3ccc(Cl)cc3)c3ccccc3nc-2cc1Nc1ccc(Cl)cc1	8168151	nan	8168151
D00279	Clofibrate (JP17/USP/INN); Atromid-S (TN)	CCOC(=O)C(C)(C)Oc1ccc(Cl)cc1	1913459	C06916	1913459
D00280	Clonazepam (JP17/USP/INN); Klonopin (TN)	O=C1CN=C(c2ccccc2Cl)c2cc([N+](=O)[O-])ccc2N1	759557	nan	759557
D00281	Clonidine (JAN/USP/INN); Catarpres-TTS (TN)	Clc1cccc(Cl)c1N=C1NCCN1	746076	nan	746076
D00282	Clotrimazole (JP17/USP/INN); Lotrimin (TN); Mycelex (TN)	Clc1ccccc1C(c1ccccc1)(c1ccccc1)n1ccnc1	622318	C06922	622318
D00283	Clozapine (JAN/USP/INN); Clozaril (TN)	CN1CCN(C2=Nc3cc(Cl)ccc3Nc3ccccc32)CC1	764984	C06924	764984
D00286	Cyclandelate (JAN/USP/INN); Cyclospasmol (TN)	CC1CC(OC(=O)C(O)c2ccccc2)CC(C)(C)C1	2216626	nan	2216626
D00287	Cyclophosphamide (USP); Cyclophosphamide hydrate (JP17); Cytoxan (TN); Neosar (TN)	O.O=P1(N(CCCl)CCCl)NCCCO1	nan	C06933	C06933
D00288	Dacarbazine (JAN/USP/INN); DTIC-Dome (TN)	CN(C)N=Nc1[nH]cnc1C(N)=O	521487	nan	521487
D00291	Desmopressin (INN)	N=C(N)NCCCC(NC(=O)C1CCCN1C(=O)C1CSSCCC(=O)NC(Cc2ccc(O)cc2)C(=O)NC(Cc2ccccc2)C(=O)NC(CCC(N)=O)C(=O)NC(CC(N)=O)C(=O)N1)C(=O)NCC(N)=O	nan	C06944	C06944
D00292	Dexamethasone (JP17/USP/INN); Decadron (TN); Maxidex (TN)	CC1CC2C3CCC4=CC(=O)C=CC4(C)C3(F)C(O)CC2(C)C1(O)C(=O)CO	2341697	nan	2341697
D00293	Diazepam (JP17/USP/INN); Diastat (TN); Valium (TN)	CN1C(=O)CN=C(c2ccccc2)c2cc(Cl)ccc21	754371	C06948	754371
D00294	Diazoxide (JAN/USP/INN); Hyperstat (TN); Proglycem (TN)	CC1=Nc2ccc(Cl)cc2S(=O)(=O)N1	523907	C06949	523907
D00295	Cimetidine (JP17/USP/INN); Tagamet (TN)	CNC(=NC#N)NCCSCc1nc[nH]c1C	888260	nan	888260
D00300	Diphenhydramine (JP17/INN); Restamin (TN)	CN(C)CCOC(c1ccccc1)c1ccccc1	1914136	C06960	1914136
D00302	Dipyridamole (JP17/USP/INN); Persantine (TN)	OCCN(CCO)c1nc(N2CCCCC2)c2nc(N(CCO)CCO)nc(N3CCCCC3)c2n1	68373	nan	68373
D00303	Disopyramide (JP17/USAN/INN); Rythmodan P (TN)	CC(C)N(CCC(C(N)=O)(c1ccccc1)c1ccccn1)C(C)C	492056	C06965	492056
D00305	Docusate sodium (USP); Sodium dioctyl sulfosuccinate (INN); Dioctyl sodium sulfosuccinate (JAN); Colace (TN)	CCCCC(CC)COC(=O)CC(C(=O)OCC(CC)CCCC)S(=O)(=O)[O-].[Na+]	4117588	nan	4117588
D00306	Dronabinol (USP/INN); Tetrahydrocannabinol; Marinol (TN)	CCCCCc1cc(O)c2c(c1)OC(C)(C)C1CCC(C)=CC21	238398	nan	238398
D00308	Droperidol (JP17/USP/INN); Droleptan (TN); Inapsine (TN)	O=C(CCCN1CC=C(n2c(=O)[nH]c3ccccc32)CC1)c1ccc(F)cc1	579168	nan	579168
D00310	Enoxacin (USAN/INN); ENX; Penetrex (TN)	CCn1cc(C(=O)O)c(=O)c2cc(F)c(N3CCNCC3)nc21	3628995	C06979	3628995
D00311	Estazolam (JP17/USP/INN); ProSom (TN)	Clc1ccc2c(c1)C(c1ccccc1)=NCc1nncn1-2	1220868	C06981	1220868
D00313	Ethacrynic acid (USP); Etacrynic acid (JP17/INN)	C=C(CC)C(=O)c1ccc(OCC(=O)O)c(Cl)c1Cl	1915060	nan	1915060
D00315	Etodolac (JP17/USP/INN); Lodine (TN)	CCc1cccc2c3c([nH]c12)C(CC)(CC(=O)O)OCC3	5761988, 5761989, 928311	C06991	928311, 5761989, 5761988
D00317	Famciclovir (JAN/USP/INN); Famvir (TN)	CC(=O)OCC(CCn1cnc2cnc(N)nc21)COC(C)=O	4208403	nan	4208403
D00318	Famotidine (JP17/USP/INN); Fluxid (TN); Pepcid (TN)	NC(N)=Nc1nc(CSCCC(N)=NS(N)(=O)=O)cs1	5767271	nan	5767271
D00319	Felodipine (JP17/USP/INN); Plendil (TN)	CCOC(=O)C1=C(C)NC(C)=C(C(=O)OC)C1c1cccc(Cl)c1Cl	4331472	nan	4331472
D00320	Fentanyl (JAN/USP/INN); Duragesic (TN); Subsys (TN)	CCC(=O)N(c1ccccc1)C1CCN(CCc2ccccc2)CC1	494484	nan	494484
D00322	Fluconazole (JP17/USP/INN); Diflucan (TN)	OC(Cn1cncn1)(Cn1cncn1)c1ccc(F)cc1F	4269710	C07002	4269710
D00323	Flucytosine (JP17/USP/INN); 5-FC; Ancobon (TN)	Nc1nc(=O)[nH]cc1F	127285	nan	127285
D00326	Fluoxetine (USAN/INN); Fluoxetine (TN)	CNCCC(Oc1ccc(C(F)(F)F)cc1)c1ccccc1	3991406	nan	3991406
D00329	Flurazepam (JAN/INN); Insumin (TN)	CCN(CC)CCN1C(=O)CN=C(c2ccccc2F)c2cc(Cl)ccc21	767925	nan	767925
D00330	Flurbiprofen (JP17/USP/INN); Ansaid (TN)	CC(C(=O)O)c1ccc(-c2ccccc2)c(F)c1	2054451	C07013	2054451
D00331	Furosemide (JP17/USP/INN); Frusemide; Lasix (TN)	NS(=O)(=O)c1cc(C(=O)O)c(NCc2ccco2)cc1Cl	840915	C07017	840915
D00332	Gabapentin (JAN/USP/INN); Neurontin (TN); Gralise (TN)	NCC1(CC(=O)O)CCCCC1	2359739	C07018	2359739
D00333	Ganciclovir (JAN/USP/INN); Cytovene (TN); Vitrasert (TN); Zirgan (TN)	Nc1nc2c(ncn2COC(CO)CO)c(=O)[nH]1	3654487	C07019	3654487
D00334	Gemfibrozil (JAN/USP/INN); Lopid (TN)	Cc1ccc(C)c(OCCCC(C)(C)C(=O)O)c1	1881200	C07020	1881200
D00335	Glipizide (USP/INN); Glucotrol (TN)	Cc1cnc(C(=O)NCCc2ccc(S(=O)(=O)NC(=O)NC3CCCCC3)cc2)cn1	903495	nan	903495
D00336	Glyburide (USP); Glibenclamide (JP17/INN); Diabeta (TN); Glynase (TN); Micronase (TN)	COc1ccc(Cl)cc1C(=O)NCCc1ccc(S(=O)(=O)NC(=O)NC2CCCCC2)cc1	2230085	C07022	2230085
D00337	Guaifenesin (JP17/USP/INN); Hustosil (TN); Robitussin (TN)	COc1ccccc1OCC(O)CO	3200276	nan	3200276
D00338	Halazepam (USAN/INN); Paxipam (TN)	O=C1CN=C(c2ccccc2)c2cc(Cl)ccc2N1CC(F)(F)F	898553	nan	898553
D00339	Haloprogin (JAN/USAN/INN); Halotex (TN)	Clc1cc(Cl)c(OCC#CI)cc1Cl	1976771	nan	1976771
D00340	Hydrochlorothiazide (JP17/USP/INN); Esidrix (TN); Microzide (TN)	NS(=O)(=O)c1cc2c(cc1Cl)NCNS2(=O)=O	625101	C07041	625101
D00343	Ifosfamide (JAN/USP/INN); Ifex (TN)	O=P1(NCCCl)OCCCN1CCCl	5802893, 6568686, 6568687	C07047	5802893, 6568687, 6568686
D00345	Indapamide (JP17/USP); Lozol (TN); Natrix (TN)	CC1Cc2ccccc2N1NC(=O)c1ccc(Cl)c(S(N)(=O)=O)c1	1604026	nan	1604026
D00346	Isoniazid (JP17/USP/INN); Laniazid (TN)	NNC(=O)c1ccncc1	119374	C07054	119374
D00347	Isosorbide (JP17/USP/INN); Ismotic (TN); Isobide (TN)	OC1COC2C(O)COC12	80508	nan	80508
D00348	Isotretinoin (USP); Absorica (TN); Accutane (TN); Sotret (TN)	CC(C=CC1=C(C)CCCC1(C)C)=CC=CC(C)=CC(=O)O	2508066	nan	2508066
D00349	Isradipine (USP/INN); Dynacirc (TN)	COC(=O)C1=C(C)NC(C)=C(C(=O)OC(C)C)C1c1cccc2nonc12	6576633	nan	6576633
D00350	Itraconazole (JP17/USP); Itrizole (TN); Sporanox (TN)	CCC(C)n1ncn(-c2ccc(N3CCN(c4ccc(OCC5COC(Cn6cncn6)(c6ccc(Cl)cc6Cl)O5)cc4)CC3)cc2)c1=O	4290027, 14206707, 9463926	nan	14206707, 9463926, 4290027
D00351	Ketoconazole (JP17/USP); Nizoral (TN); Xolegel (TN)	CC(=O)N1CCN(c2ccc(OCC3COC(Cn4ccnc4)(c4ccc(Cl)cc4Cl)O3)cc2)CC1	9027706, 634785	nan	634785, 9027706
D00353	Lamivudine (JAN/USP/INN); Epivir (TN)	Nc1ccn(C2CSC(CO)O2)c(=O)n1	20386290, 11659214, 20386289, 5908118, 11659326, 20386288	nan	11659214, 5908118, 20386290, 11659326, 20386288, 20386289
D00354	Lamotrigine (JAN/USP/INN); Lamictal (TN)	Nc1nnc(-c2cccc(Cl)c2Cl)c(N)n1	7589268	nan	7589268
D00355	Lansoprazole (JP17/USP/INN); Prevacid (TN)	Cc1c(OCC(F)(F)F)ccnc1CS(=O)c1nc2ccccc2[nH]1	4333393	nan	4333393
D00357	Losartan potassium (JP17/USP); Cozaar (TN)	CCCCc1nc(Cl)c(CO)n1Cc1ccc(-c2ccccc2-c2nnn[n-]2)cc1.[K+]	5900704	nan	5900704
D00358	Lidocaine (JP17/USP/INN); Dentipatch (TN); Xylocaine (TN)	CCN(CC)CC(=O)Nc1c(C)cccc1C	2215784	C07073	2215784
D00360	Lindane (USP/INN); Kwell (TN)	ClC1C(Cl)C(Cl)C(Cl)C(Cl)C1Cl	1907331	C18738	1907331
D00363	Lomustine (USP/INN); Gleostine (TN)	O=NN(CCCl)C(=O)NC1CCCCC1	2125058	C07079	2125058
D00364	Loratadine (JAN/USP/INN); Claritin (TN)	CCOC(=O)N1CCC(=C2c3ccc(Cl)cc3CCc3cccnc32)CC1	4273483	nan	4273483
D00365	Lorazepam (JP17/USP/INN); Ativan (TN)	O=C1Nc2ccc(Cl)cc2C(c2ccccc2Cl)=NC1O	759084	nan	759084
D00366	Lypressin (USAN/INN); Diapid (TN)	NCCCCC(NC(=O)C1CCCN1C(=O)C1CSSCC(N)C(=O)NC(Cc2ccc(O)cc2)C(=O)NC(Cc2ccccc2)C(=O)NC(CCC(N)=O)C(=O)NC(CC(N)=O)C(=O)N1)C(=O)NCC(N)=O	nan	C07105	C07105
D00367	Mazindol (JAN/USP/INN); Sanorex (TN)	OC1(c2ccc(Cl)cc2)c2ccccc2C2=NCCN21	546547	nan	546547
D00368	Mebendazole (JAN/USP/INN); Vermox (TN)	COC(=O)Nc1nc2cc(C(=O)c3ccccc3)ccc2[nH]1	759809	nan	759809
D00369	Melphalan (JP17/USP/INN); Alkeran (TN)	NC(Cc1ccc(N(CCCl)CCCl)cc1)C(=O)O	1485409	C19256	1485409
D00370	Temazepam (USP/INN); Restoril (TN)	CN1C(=O)C(O)N=C(c2ccccc2)c2cc(Cl)ccc21	759300	C07125	759300
D00371	Theophylline (JP17); Elixophyllin (TN); Quibron-t (TN); Theo-24 (TN); Theodur G (TN); Theolair (TN); Uniphyl (TN)	Cn1c(=O)c2[nH]cnc2n(C)c1=O	13463	C07130	13463
D00372	Thiabendazole (USP); Tiabendazole (JAN/INN); Mintezol (TN)	c1ccc2[nH]c(-c3cscn3)nc2c1	611403	C07131	611403
D00373	Thioridazine (USP/INN); Mellaril-S (TN)	CSc1ccc2c(c1)N(CCC1CCCCN1C)c1ccccc1S2	94457, 9663152	nan	9663152, 94457
D00374	Thiothixene (USP); Tiotixene (JAN); Navane (TN)	CN1CCN(CCC=C2c3ccccc3Sc3ccc(S(=O)(=O)N(C)C)cc32)CC1	903138	nan	903138
D00375	Mephenytoin (USP/INN); Mesantoin (TN)	CCC1(c2ccccc2)NC(=O)N(C)C1=O	5746961, 17282	nan	17282, 5746961
D00376	Meprobamate (JAN/USP/INN); Equanil (TN); Miltown (TN)	CCCC(C)(COC(N)=O)COC(N)=O	1788882	nan	1788882
D00377	Mesalamine (USP); Mesalazine (JP17/INN); Apriso (TN); Asacol (TN); Canasa (TN); Delzicol (TN); Lialda (TN); Mesalamine (TN); Pentasa (TN); Rowasa (TN); Sfrowasa (TN)	Nc1ccc(O)c(C(=O)O)c1	2090421	C07138	2090421
D00380	Tolbutamide (JP17/USP/INN); Orinase (TN)	CCCCNC(=O)NS(=O)(=O)c1ccc(C)cc1	1984428	C07148	1984428
D00381	Tolnaftate (JP17/USP/INN); Separin (TN); Tinactin (TN)	Cc1cccc(N(C)C(=S)Oc2ccc3ccccc3c2)c1	2752620	nan	2752620
D00382	Torsemide (USP); Torasemide (JAN/INN); Demadex (TN); Luprac (TN)	Cc1cccc(Nc2ccncc2S(=O)(=O)NC(=O)NC(C)C)c1	498515	nan	498515
D00384	Triacetin (USP/INN); Enzactin (TN)	CC(=O)OCC(COC(C)=O)OC(C)=O	1792353	nan	1792353
D00386	Triamterene (JP17/USP/INN); Dyrenium (TN)	Nc1nc(N)c2nc(-c3ccccc3)c(N)nc2n1	266723	nan	266723
D00387	Triazolam (JAN/USP/INN); Halcion (TN)	Cc1nnc2n1-c1ccc(Cl)cc1C(c1ccccc1Cl)=NC2	1226643	nan	1226643
D00390	Triflupromazine (USP/INN); Vesprin (TN)	CN(C)CCCN1c2ccccc2Sc2ccc(C(F)(F)F)cc21	335308	nan	335308
D00392	Trimethadione (JP17/INN); Tridione (TN)	CN1C(=O)OC(C)(C)C1=O	121627	nan	121627
D00393	Methenamine (USP/INN); Hexamine (JAN); Hexamine (TN)	C1N2CN3CN1CN(C2)C3	2018, 8140542, 23131375	nan	23131375, 8140542, 2018
D00394	Trimipramine (USAN/INN)	CC(CN(C)C)CN1c2ccccc2CCc2ccccc21	1321466	nan	1321466
D00395	Troglitazone (JAN/USAN/INN); Rezulin (TN)	Cc1c(C)c2c(c(C)c1O)CCC(C)(COc1ccc(CC3SC(=O)NC3=O)cc1)O2	4338399	nan	4338399
D00396	Tromethamine (USP); Trometamol (JAN/INN); THAM (TN)	NC(CO)(CO)CO	741883	C07182	741883
D00397	Tropicamide (JP17/USP/INN); Mydriacyl (TN)	CCN(Cc1ccncc1)C(=O)C(CO)c1ccccc1	285563	nan	285563
D00398	Valacyclovir hydrochloride (USP); Valaciclovir hydrochloride (JP17); Valtrex (TN)	CC(C)C(N)C(=O)OCCOCn1cnc2c(=O)[nH]c(N)nc21.Cl	14444341	nan	14444341
D00399	Valproic acid (USP); Depakene (TN)	CCCC(CCC)C(=O)O	1750447	C07185	1750447
D00400	Valsartan (JP17/USP/INN); Diovan (TN)	CCCCC(=O)N(Cc1ccc(-c2ccccc2-c2nnn[nH]2)cc1)C(C(=O)O)C(C)C	9088643	nan	9088643
D00401	Methimazole (USP); Thiamazole (JP17/INN); Tapazole (TN)	Cn1cc[nH]c1=S	8311529, 108646	C07190	108646, 8311529
D00402	Methocarbamol (JAN/USP/INN); Delaxin (TN); Robaxin (TN)	COc1ccccc1OCC(O)COC(N)=O	1884446	nan	1884446
D00403	Methotrimeprazine (USP); Levomepromazine (USAN/INN); Levoprome (TN)	COc1ccc2c(c1)N(CC(C)CN(C)C)c1ccccc1S2	92435	nan	92435
D00404	Methsuximide (USP); Mesuximide (INN); Celontin (TN)	CN1C(=O)CC(C)(c2ccccc2)C1=O	168315	nan	168315
D00408	Methyltestosterone (JP17/USP/INN); Android (TN); Testred (TN)	CC12CCC(=O)C=C1CCC1C2CCC2(C)C1CCC2(C)O	18056003, 2622792	nan	18056003, 2622792
D00409	Metronidazole (JP17/USP/INN); Flagyl (TN); Metrogel-vaginal (TN); Noritate (TN)	Cc1ncc([N+](=O)[O-])n1CCO	611683	C07203	611683
D00410	Metyrapone (JP17/USP/INN); Metopirone (TN)	CC(C)(C(=O)c1cccnc1)c1cccnc1	163023	C07205	163023
D00411	Zafirlukast (JAN/USAN/INN); Accolate (TN)	COc1cc(C(=O)NS(=O)(=O)c2ccccc2C)ccc1Cc1cn(C)c2ccc(NC(=O)OC3CCCC3)cc12	3641829	C07206	3641829
D00413	Zidovudine (JP17/USP/INN); Retrovir (TN)	Cc1cn(C2CC(N=[N+]=[N-])C(CO)O2)c(=O)[nH]c1=O	3595790	nan	3595790
D00414	Zileuton (USP/INN); Zyflo (TN)	CC(c1cc2ccccc2s1)N(O)C(N)=O	4869674	nan	4869674
D00416	Miconazole (JP17/USP/INN); Monistat (TN); Oravig (TN)	Clc1ccc(COC(Cn2ccnc2)c2ccc(Cl)cc2Cl)c(Cl)c1	32700165, 32700164, 965511	nan	32700164, 32700165, 965511
D00417	Milrinone (JAN/USP/INN); Milrila (TN)	Cc1[nH]c(=O)c(C#N)cc1-c1ccncc1	3546821	C07224	3546821
D00418	Minoxidil (JAN/USP/INN); Loniten (TN); Riup (TN); Rogaine (TN)	Nc1cc(N2CCCCC2)nc(N)[n+]1[O-]	886240	nan	886240
D00420	Mitotane (JAN/USP/INN); Lysodren (TN)	Clc1ccc(C(c2ccccc2Cl)C(Cl)Cl)cc1	2056007	nan	2056007
D00422	Ranitidine (USAN/INN); Ranitidine (TN)	CNC(=C[N+](=O)[O-])NCCSCc1ccc(CN(C)C)o1	4845772	nan	4845772
D00424	Rifabutin (JAN/USP/INN); Mycobutin (TN)	COC1C=COC2(C)Oc3c(C)c(O)c4c(c3C2=O)C2=NC3(CCN(CC(C)C)CC3)NC2=C(NC(=O)C(C)=CC=CC(C)C(O)C(C)C(O)C(C)C(OC(C)=O)C1C)C4=O	3584778	nan	3584778
D00425	Nabumetone (JP17/USP/INN); Relafen (TN)	COc1ccc2cc(CCC(C)=O)ccc2c1	2103472	nan	2103472
D00426	Risperidone (JP17/USP/INN); Risperdal (TN)	Cc1nc2n(c(=O)c1CCN1CCC(c3noc4cc(F)ccc34)CC1)CCCC2	4891881	nan	4891881
D00428	Salsalate (USP/INN); Sasapyrine (JAN); Disalcid (TN)	O=C(Oc1ccccc1C(=O)O)c1ccccc1O	2590908	nan	2590908
D00430	Secobarbital (USP/INN); Seconal (TN)	C=CCC1(C(C)CCC)C(=O)NC(=O)NC1=O	225330	nan	225330
D00432	Nadolol (JP17/USP/INN); Corgard (TN)	CC(C)(C)NCC(O)COc1cccc2c1CC(O)C(O)C2	2059000	nan	2059000
D00433	Sulfadiazine, silver (USP); Sulfadiazine silver (JP17); Silvadene (TN)	Nc1ccc(S(=O)(=O)[N-]c2ncccn2)cc1.[Ag+]	924042	nan	924042
D00434	Simvastatin (JP17/USP/INN); MK-733; Zocor (TN)	CCC(C)(C)C(=O)OC1CC(C)C=C2C=CC(C)C(CCC3CC(O)CC(=O)O3)C21	14427634	nan	14427634
D00435	Nevirapine (JAN/USP/INN); Viramune (TN)	Cc1ccnc2c1NC(=O)c1cccnc1N2C1CC1	4757598	C07263	4757598
D00436	Niclosamide (USAN/INN); Niclocide (TN)	O=C(Nc1ccc([N+](=O)[O-])cc1Cl)c1cc(Cl)ccc1O	2820605	nan	2820605
D00437	Nifedipine (JP17/USP/INN); Adalat (TN); Afeditab CR (TN); Procardia (TN)	COC(=O)C1=C(C)NC(C)=C(C(=O)OC)C1c1ccccc1[N+](=O)[O-]	497773	C07266	497773
D00438	Nimodipine (USP/INN); Nimotop (TN); Nymalize (TN)	COCCOC(=O)C1=C(C)NC(C)=C(C(=O)OC(C)C)C1c1cccc([N+](=O)[O-])c1	459792	C07267	459792
D00439	Nitrofurantoin (JAN/USP/INN); Furadantin (TN)	O=C1CN(N=Cc2ccc([N+](=O)[O-])o2)C(=O)N1	8132135	nan	8132135
D00440	Nizatidine (JP17/USP/INN); Acinon (TN); Axid (TN)	CNC(=C[N+](=O)[O-])NCCSCc1csc(CN(C)C)n1	4846056	nan	4846056
D00441	Octabenzone (USAN)	CCCCCCCCOc1ccc(C(=O)c2ccccc2)c(O)c1	1915198	nan	1915198
D00442	Octreotide (USAN/INN)	CC(O)C(CO)NC(=O)C1CSSCC(NC(=O)C(N)Cc2ccccc2)C(=O)NC(Cc2ccccc2)C(=O)NC(Cc2c[nH]c3ccccc23)C(=O)NC(CCCCN)C(=O)NC(C(C)O)C(=O)N1	nan	C07306	C07306
D00445	Stavudine (USAN/INN); Sanilvudine (JAN); Zerit (TN)	Cc1cn(C2C=CC(CO)O2)c(=O)[nH]c1=O	7168547	nan	7168547
D00447	Sulfamethoxazole (JP17/USP/INN); Gantanol (TN)	Cc1cc(NS(=O)(=O)c2ccc(N)cc2)no1	226453	C07315	226453
D00448	Sulfasalazine (USP/INN); Salazosulfapyridine (JP17); Azulfidine (TN)	O=C(O)c1cc(N=Nc2ccc(S(=O)(=O)Nc3ccccn3)cc2)ccc1O	8132868	nan	8132868
D00449	Sulfinpyrazone (JAN/USP/INN); Anturane (TN)	O=C1C(CCS(=O)c2ccccc2)C(=O)N(c2ccccc2)N1c1ccccc1	713597	C07317	713597
D00450	Sulfisoxazole (JP17/USP); Sulfafurazole (INN); Gantrisin (TN)	Cc1noc(NS(=O)(=O)c2ccc(N)cc2)c1C	263871	C07318	263871
D00451	Sumatriptan (JAN/USP/INN); Imigran (TN); Imitrex (TN)	CNS(=O)(=O)Cc1ccc2[nH]cc(CCN(C)C)c2c1	5346011	C07319	5346011
D00452	Suprofen (JAN/USP/INN); Profenal (TN)	CC(C(=O)O)c1ccc(C(=O)c2cccs2)cc1	1430606	C07320	1430606
D00453	Ofloxacin (JP17/USP/INN); OFLX; Floxin (TN)	CC1COc2c(N3CCN(C)CC3)c(F)cc3c(=O)c(C(=O)O)cn1c23	3657947	C07321	3657947
D00454	Olanzapine (JAN/USP/INN); Zyprexa (TN)	Cc1cc2c(s1)Nc1ccccc1N=C2N1CCN(C)CC1	7655141	C07322	7655141
D00455	Omeprazole (JP17/USP/INN); Prilosec (TN)	COc1ccc2[nH]c(S(=O)Cc3ncc(C)c(OC)c3C)nc2c1	8941801, 8943333, 19077957, 3628192	C07324	8941801, 3628192, 8943333, 19077957
D00456	Ondansetron (JAN/USP/INN); Zofran ODT (TN)	Cc1nccn1CC1CCc2c(c3ccccc3n2C)C1=O	3622981	C07325	3622981
D00457	Quazepam (JAN/USP/INN); Doral (TN)	Fc1ccccc1C1=NCC(=S)N(CC(F)(F)F)c2ccc(Cl)cc21	901084	C07336	901084
D00460	Oxamniquine (USAN/INN); Mansil (TN); Vansil (TN)	CC(C)NCC1CCc2cc(CO)c([N+](=O)[O-])cc2N1	485597	C07341	485597
D00461	Quinethazone (JAN/INN); Hydromox (TN)	CCC1NC(=O)c2cc(S(N)(=O)=O)c(Cl)cc2N1	818554	C07342	818554
D00463	Oxaprozin (JP17/USP/INN); Daypro (TN)	O=C(O)CCc1nc(-c2ccccc2)c(-c2ccccc2)o1	1083168	C07356	1083168
D00464	Oxazepam (JAN/USP/INN); Serax (TN)	O=C1Nc2ccc(Cl)cc2C(c2ccccc2)=NC1O	6065314, 6065313, 754065	C07359	6065313, 6065314, 754065
D00465	Oxybutynin (USAN/INN); Anturol (TN); Oxytrol (TN)	CCN(CC)CC#CCOC(=O)C(O)(c1ccccc1)C1CCCCC1	2707356	C07360	2707356
D00467	Pipobroman (JAN/USAN/INN); Vercyte (TN)	O=C(CCBr)N1CCN(C(=O)CCBr)CC1	749866	C07362	749866
D00469	Pralidoxime chloride (USP); Pralidoxime (INN); Protopam (TN)	C[n+]1ccccc1C=NO.[Cl-]	4163981	nan	4163981
D00470	Prazepam (JP17/USAN/INN); Centrax (TN)	O=C1CN=C(c2ccccc2)c2cc(Cl)ccc2N1CC1CC1	895797	C07366	895797
D00471	Praziquantel (JAN/USP/INN); Biltricide (TN)	O=C(C1CCCCC1)N1CC(=O)N2CCc3ccccc3C2C1	29269883, 29269882, 761557	C07367	29269883, 29269882, 761557
D00474	Primidone (JP17/USP/INN); Mysoline (TN)	CCC1(c2ccccc2)C(=O)NCNC1=O	218034	C07371	218034
D00475	Probenecid (JP17/USP/INN); Benemid (TN)	CCCN(CCC)S(=O)(=O)c1ccc(C(=O)O)cc1	2815775	C07372	2815775
D00476	Probucol (JP17/USP/INN); Lorelco (TN)	CC(C)(Sc1cc(C(C)(C)C)c(O)c(C(C)(C)C)c1)Sc1cc(C(C)(C)C)c(O)c(C(C)(C)C)c1	2026253	C07373	2026253
D00477	Procainamide hydrochloride (JP17/USP); Procan SR (TN); Procanbid (TN); Pronestyl (TN)	CCN(CC)CCNC(=O)c1ccc(N)cc1.Cl	3729517, 23553572	nan	3729517, 23553572
D00478	Procarbazine hydrochloride (JP17/USP); Matulane (TN)	CNNCc1ccc(C(=O)NC(C)C)cc1.Cl	nan	C07376	C07376
D00480	Promethazine hydrochloride (JP17/USP); Phenergan (TN); Promethegan (TN)	CC(CN1c2ccccc2Sc2ccccc21)N(C)C.Cl	4166397	nan	4166397
D00481	Propantheline bromide (JP17/USP/INN); Pro-banthine (TN)	CC(C)[N+](C)(CCOC(=O)C1c2ccccc2Oc2ccccc21)C(C)C.[Br-]	3643037	nan	3643037
D00483	Propranolol hydrochloride (JP17/USP); Inderal (TN); Innopran XL (TN)	CC(C)NCC(O)COc1cccc2ccccc12.Cl	4164259	nan	4164259
D00484	Protriptyline hydrochloride (USP); Vivactil (TN)	CNCCCC1c2ccccc2C=Cc2ccccc21.Cl	6248587	nan	6248587
D00485	Pseudoephedrine hydrochloride (USP); Sudafed (TN)	CNC(C)C(O)c1ccccc1.Cl	7049238, 4788519, 8170066, 3630391, 6490347, 6490346, 7751992	nan	4788519, 6490347, 8170066, 7049238, 3630391, 7751992, 6490346
D00487	Pyridostigmine bromide (JP17/USP/INN); Mestinon (TN)	CN(C)C(=O)Oc1ccc[n+](C)c1.[Br-]	3764573	nan	3764573
D00488	Pyrimethamine (JAN/USP/INN); Daraprim (TN)	CCc1nc(N)nc(N)c1-c1ccc(Cl)cc1	219864	C07391	219864
D00491	Paclitaxel (JAN/USP/INN); Abraxane (TN); Taxol (TN)	CC(=O)OC1C(=O)C2(C)C(O)CC3OCC3(OC(C)=O)C2C(OC(=O)c2ccccc2)C2(O)CC(OC(=O)C(O)C(NC(=O)c3ccccc3)c3ccccc3)C(C)=C1C2(C)C	14655130	nan	14655130
D00493	Prochlorperazine (JAN/USP/INN); Compro (TN)	CN1CCN(CCCN2c3ccccc3Sc3ccc(Cl)cc32)CC1	48537	C07403	48537
D00494	Promethazine (JAN/INN)	CC(CN1c2ccccc2Sc2ccccc21)N(C)C	88554, 563003	C07404	563003, 88554
D00495	Paramethadione (INN); Paradione (TN)	CCC1(C)OC(=O)N(C)C1=O	127715	C07411	127715
D00496	Penicillamine (JAN/USP/INN); Cuprimine (TN); Depen (TN)	CC(C)(S)C(N)C(=O)O	4291203, 1722376, 4657324, 4349862	nan	1722376, 4291203, 4657324, 4349862
D00497	Penicillin V potassium (USP); Phenoxymethylpenicillin potassium (JAN); Veetids (TN)	CC1(C)SC2C(NC(=O)COc3ccccc3)C(=O)N2C1C(=O)[O-].[K+]	4119031	nan	4119031
D00499	Pentobarbital (USP/INN); Nembutal (TN)	CCCC(C)C1(CC)C(=O)NC(=O)NC1=O	87067	C07422	87067
D00500	Pentobarbital sodium (JAN/USP); Nembutal sodium (TN)	CCCC(C)C1(CC)C(=O)N=C([O-])NC1=O.[Na+]	nan	C07423	C07423
D00501	Pentoxifylline (JAN/USP/INN); Pentoxil (TN); Trental (TN)	CC(=O)CCCCn1c(=O)c2c(ncn2C)n(C)c1=O	558929	C07424	558929
D00503	Perphenazine (JP17/USP/INN); Trilafon (TN)	OCCN1CCN(CCCN2c3ccccc3Sc3ccc(Cl)cc32)CC1	54730	C07427	54730
D00504	Phenacemide (JAN/INN); Phenurone (TN)	NC(=O)NC(=O)Cc1ccccc1	2048735	C07428	2048735
D00505	Phenelzine sulfate (USP); Nardil (TN)	NNCCc1ccccc1.O=S(=O)(O)O	4612238, 6305519	C07431	4612238, 6305519
D00506	Phenobarbital (JP17/USP/INN); Luminal (TN)	CCC1(c2ccccc2)C(=O)NC(=O)NC1=O	233363	C07434	233363
D00507	Phenoxybenzamine hydrochloride (USP); Dibenzyline (TN)	CC(COc1ccccc1)N(CCCl)Cc1ccccc1.Cl	3747029	C07436	3747029
D00508	Phensuximide (USP/INN); Milontin (TN)	CN1C(=O)CC(c2ccccc2)C1=O	155329	C07437	155329
D00509	Phentolamine mesylate (USP); Phentolamine mesilate (JAN/INN); Regitine (TN)	CS(=O)(=O)O.Cc1ccc(N(CC2=NCCN2)c2cccc(O)c2)cc1	3826682	nan	3826682
D00510	Phenylbutazone (JP17/USP/INN); Azolid (TN)	CCCCC1C(=O)N(c2ccccc2)N(c2ccccc2)C1=O	290080	C07440	290080
D00511	Phenylephrine hydrochloride (JP17/USP); Neo-synephrine (TN)	CNCC(O)c1cccc(O)c1.Cl	3631744	nan	3631744
D00512	Phenytoin (JP17/USP/INN); Dilantin (TN)	O=C1N=C(O)NC1(c1ccccc1)c1ccccc1	nan	C07443	C07443
D00513	Pindolol (JP17/USP/INN); Blocklin-L (TN); Carvisken (TN); Visken (TN)	CC(C)NCC(O)COc1cccc2[nH]ccc12	1536506	C07445	1536506
D00514	Dexmedetomidine (USAN/INN); Dexdor (TN); Precedex (TN)	Cc1cccc(C(C)c2c[nH]cn2)c1C	4865231	nan	4865231
D00515	Nitroglycerin (JP17/USP); Glyceryl trinitrate; Minitran (TN); Nitro-bid (TN); Nitro-dur (TN); Nitromist (TN); Transderm-nitro (TN)	O=[N+]([O-])OCC(CO[N+](=O)[O-])O[N+](=O)[O-]	1802063	C07455	1802063
D00516	Isosorbide dinitrate (JP17/USP/INN); Dilatrate-sr (TN); Isordil (TN)	O=[N+]([O-])OC1COC2C(O[N+](=O)[O-])COC12	10657522	nan	10657522
D00517	Amyl nitrite (JP17/USP); Aspiral (TN); Vaporole (TN)	CC(C)CCON=O	969510	C07457	969510
D00518	Dichlorphenamide (USP); Diclofenamide (JAN/INN); Daranide (TN); Keveyis (TN)	NS(=O)(=O)c1cc(Cl)c(Cl)c(S(N)(=O)=O)c1	2703329	C07459	2703329
D00519	Chlorothiazide (JAN/USP/INN); Diuril (TN)	NS(=O)(=O)c1cc2c(cc1Cl)N=CNS2(=O)=O	34611	C07461	34611
D00521	Terfenadine (JAN/USAN/INN); Seldane (TN)	CC(C)(C)c1ccc(C(O)CCCN2CCC(C(O)(c3ccccc3)c3ccccc3)CC2)cc1	5857899	C07463	5857899
D00522	Candesartan (USAN/INN)	CCOc1nc2cccc(C(=O)O)c2n1Cc1ccc(-c2ccccc2-c2nnn[nH]2)cc1	6377719	C07468	6377719
D00523	Irbesartan (JP17/USP/INN); Avapro (TN)	CCCCC1=NC2(CCCC2)C(=O)N1Cc1ccc(-c2ccccc2-c2nnn[nH]2)cc1	6620400	C07469	6620400
D00524	Carbachol (JAN/USP/INN); Miostat (TN)	C[N+](C)(C)CCOC(N)=O.[Cl-]	3917459	nan	3917459
D00525	Pilocarpine (JAN/USP); Ocusert pilo-20 (TN)	CCC1C(=O)OCC1Cc1cncn1C	86186	nan	86186
D00528	Caffeine (USP); Anhydrous caffeine (JP17); Anhydrous caffeine (TN); Respia (TN)	Cn1c(=O)c2c(ncn2C)n(C)c1=O	6422678, 17705	C07481	17705, 6422678
D00530	Zaleplon (JAN/USP/INN); Sonata (TN)	CCN(C(C)=O)c1cccc(-c2ccnc3c(C#N)cnn23)c1	8153844	C07484	8153844
D00531	Nitrazepam (JP17/USAN/INN); Benzalin (TN); Nitrazepam (TN)	O=C1CN=C(c2ccccc2)c2cc([N+](=O)[O-])ccc2N1	757185	C07487	757185
D00532	Glutethimide (JAN/INN); Doriden (TN)	CCC1(c2ccccc2)CCC(=O)NC1=O	84989	C07489	84989
D00533	Oxcarbazepine (JAN/USP/INN); Oxtellar (TN); Trileptal (TN)	NC(=O)N1c2ccccc2CC(=O)c2ccccc21	1474055	C07492	1474055
D00534	Malathion (USP); Ovide (TN)	CCOC(=O)CC(SP(=S)(OC)OC)C(=O)OCC	1804525	C07497	1804525
D00535	Vigabatrin (JAN/USP/INN); Sabril (TN)	C=CC(N)CCC(=O)O	4955364	C07500	4955364
D00536	Felbamate (USPINN); Felbatol (TN)	NC(=O)OCC(COC(N)=O)c1ccccc1	3345236	C07501	3345236
D00538	Zonisamide (JP17/USP/INN); Excegran (TN)	NS(=O)(=O)Cc1noc2ccccc12	1077076	C07504	1077076
D00539	Ethosuximide (JP17/USP/INN); Zarontin (TN)	CCC1(C)CC(=O)NC1=O	117054	C07505	117054
D00540	Glycopyrrolate (USP); Glycopyrronium bromide (JAN/INN); Cuvposa (TN); Robinul (TN); Seebri breezhaler (TN)	C[N+]1(C)CCC(OC(=O)C(O)(c2ccccc2)C2CCCC2)C1.[Br-]	3642926, 22115041	nan	22115041, 3642926
D00541	Hycanthone (USAN/INN)	CCN(CC)CCNc1ccc(CO)c2sc3ccccc3c(=O)c12	1402722	nan	1402722
D00542	Halothane (JP17/USP/INN); Fluothane (TN)	FC(F)(F)C(Cl)Br	1736947	C07515	1736947
D00543	Enflurane (JP17/USP/INN); Ethrane (TN)	FC(F)OC(F)(F)C(F)Cl	1903921	C07516	1903921
D00544	Methoxyflurane (USP/INN); Penthrane (TN)	COC(F)(F)C(Cl)Cl	1737766	C07517	1737766
D00545	Isoflurane (JP17/USP/INN); Forane (TN)	FC(F)OC(Cl)C(F)(F)F	1852087	C07518	1852087
D00546	Desflurane (JAN/USP/INN); Suprane (TN)	FC(F)OC(F)C(F)(F)F	7286887	C07519	7286887
D00547	Sevoflurane (JP17/USAN/INN); Ultane (TN)	FCOC(C(F)(F)F)C(F)(F)F	2041023	C07520	2041023
D00549	Propofol (JAN/USP/INN); Diprivan (TN)	CC(C)c1cccc(C(C)C)c1O	1866484	C07523	1866484
D00550	Midazolam (JAN/USP/INN); Dormicum (TN); Buccolam (TN); Nayzilam (TN)	Cc1ncc2n1-c1ccc(Cl)cc1C(c1ccccc1F)=NC2	625572	C07524	625572
D00551	Tetracaine (USP/INN); Amethocaine; Amethocaine (TN)	CCCCNc1ccc(C(=O)OCCN(C)C)cc1	2216051	C07526	2216051
D00552	Benzocaine (USP/INN); Ethyl aminobenzoate (JP17); Parathesin (TN)	CCOC(=O)c1ccc(N)cc1	638434	C07527	638434
D00553	Prilocaine (USP/INN); Propitocaine (JAN)	CCCNC(C)C(=O)Nc1ccccc1C	2108498	C07531	2108498
D00554	Ethinyl estradiol (USP); Ethinylestradiol (JP17/INN); Estinyl (TN)	C#CC1(O)CCC2C3CCc4cc(O)ccc4C3CCC21C	17220805	nan	17220805
D00555	Amobarbital (JP17/INN); Isomytal (TN)	CCC1(CCC(C)C)C(=O)N=C(O)NC1=O	nan	C07536	C07536
D00556	Aminopyrine (JAN); Aminophenazone (INN)	Cc1c(N(C)C)c(=O)n(-c2ccccc2)n1C	5979359, 222626	C07539	5979359, 222626
D00557	Methaqualone (JAN/USAN/INN)	Cc1ccccc1-n1c(C)nc2ccccc2c1=O	5747457, 5747458, 211874	C07560	5747457, 211874, 5747458
D00560	Pimozide (JP17/USP/INN); Orap (TN)	O=c1[nH]c2ccccc2n1C1CCN(CCCC(c2ccc(F)cc2)c2ccc(F)cc2)CC1	729089	C07566	729089
D00561	Sertindole (USAN/INN); SerLect (TN)	O=C1NCCN1CCN1CCC(c2cn(-c3ccc(F)cc3)c3ccc(Cl)cc23)CC1	5364890	C07567	5364890
D00562	Propylthiouracil (JP17/USP/INN); Propylthiouracil (TN)	CCCc1cc(=O)[nH]c(=S)[nH]1	130039	C07569	130039
D00563	Mirtazapine (JAN/USP/INN); Remeron (TN); Reflex (TN)	CN1CCN2c3ncccc3Cc3ccccc3C2C1	549345	C07570	549345
D00564	Warfarin sodium (USP); Coumadin (TN); Jantoven (TN)	CC(=O)CC(c1ccccc1)c1c([O-])c2ccccc2oc1=O.[Na+]	5469050	nan	5469050
D00565	Fenofibrate (JAN/USP/INN); Antara (TN); Lipantil (TN); Lipofen (TN); Tricor (TN); Triglide (TN)	CC(C)OC(=O)C(C)(C)Oc1ccc(C(=O)c2ccc(Cl)cc2)cc1	2062462	C07586	2062462
D00566	Sodium salicylate (JP17/USP); Salsonin (TN)	O=C([O-])c1ccccc1O.[Na+]	3732792	C07587	3732792
D00567	Celecoxib (JAN/USP/INN); Celebrex (TN); Onsenal (TN)	Cc1ccc(-c2cc(C(F)(F)F)nn2-c2ccc(S(N)(=O)=O)cc2)cc1	7662430	C07589	7662430
D00568	Rofecoxib (JAN/USAN/INN); Vioxx (TN)	CS(=O)(=O)c1ccc(C2=C(c3ccccc3)C(=O)OC2)cc1	8269007	C07590	8269007
D00569	Phenacetin (JAN/INN)	CCOc1ccc(NC(C)=O)cc1	1869238	C07591	1869238
D00570	Colchicine (JP17/USP); Colchicine (TN)	COc1cc2c(c(OC)c1OC)-c1ccc(OC)c(=O)cc1C(NC(C)=O)CC2	2228812	nan	2228812
D00572	Succimer (USAN/INN); meso-Dimercaptosuccinic acid; Chemet (TN)	O=C(O)C(S)C(S)C(=O)O	1725149	nan	1725149
D00574	Aminoglutethimide (USP/INN); Cytadren (TN)	CCC1(c2ccc(N)cc2)CCC(=O)NC1=O	210656	C07617	210656
D00575	Mestranol (JP17/USP/INN)	C#CC1(O)CCC2C3CCc4cc(OC)ccc4C3CCC21C	8930321	nan	8930321
D00577	Diethylstilbestrol (USP/INN); Stilbestrol (TN)	CCC(=C(CC)c1ccc(O)cc1)c1ccc(O)cc1	2056094	nan	2056094
D00578	Voriconazole (JP17/USP/INN); Vfend (TN)	CC(c1ncncc1F)C(O)(Cn1cncn1)c1ccc(F)cc1F	8788322, 18986923, 31948598	nan	18986923, 8788322, 31948598
D00580	Sulfadoxine (JAN/USP/INN)	COc1ncnc(NS(=O)(=O)c2ccc(N)cc2)c1OC	625453	C07630	625453
D00581	Iodoquinol (USP); Diiodohydroxyquinoline (INN); Yodoxin (TN)	Oc1c(I)cc(I)c2cccnc12	153639	C07636	153639
D00583	Thiotepa (JAN/USP/INN); Thioplex (TN); Tepadina (TN); Rethio (TN)	S=P(N1CC1)(N1CC1)N1CC1	145978	C07641	145978
D00584	Fluorouracil (JP17/USP/INN); 5-FU (TN); Adrucil (TN); Carac (TN); Fluoroplex (TN)	O=c1[nH]cc(F)c(=O)[nH]1	127172	C07649	127172
D00586	Flutamide (JP17/USP/INN); Eulexin (TN)	CC(C)C(=O)Nc1ccc([N+](=O)[O-])c(C(F)(F)F)c1	2157663	C07653	2157663
D00587	Sulfadiazine (JAN/USP/INN); Sulfapyrimidine; Sulfadiazine (TN)	Nc1ccc(S(=O)(=O)Nc2ncccn2)cc1	235192	C07658	235192
D00590	Sparfloxacin (JAN/USAN/INN); SPFX; Zagam (TN)	CC1CN(c2c(F)c(N)c3c(=O)c(C(=O)O)cn(C4CC4)c3c2F)CC(C)N1	8526996, 4276949, 30507940	nan	8526996, 30507940, 4276949
D00591	Ethionamide (JP17/USP/INN); Trecator (TN)	CCc1cc(C(N)=S)ccn1	116474	C07665	116474
D00592	Dapsone (USP); Diaphenylsulfone (JAN); Aczone (TN)	Nc1ccc(S(=O)(=O)c2ccc(N)cc2)cc1	788055	C07666	788055
D00593	Glimepiride (JP17/USP/INN); Amaryl (TN)	CCC1=C(C)CN(C(=O)NCCc2ccc(S(=O)(=O)NC(=O)NC3CCC(C)CC3)cc2)C1=O	5365754, 8376456, 32230406	C07669	32230406, 5365754, 8376456
D00594	Repaglinide (JAN/USP/INN); Prandin (TN); Surepost (TN)	CCOc1cc(CC(=O)NC(CC(C)C)c2ccccc2N2CCCCC2)ccc1C(=O)O	8238029	nan	8238029
D00595	Buformin (USAN/INN)	CCCCNC(=N)NC(=N)N	607037	C07674	607037
D00596	Rosiglitazone maleate (JAN/USP); Avandia (TN)	CN(CCOc1ccc(CC2SC(=O)NC2=O)cc1)c1ccccn1.O=C(O)C=CC(=O)O	20454005	nan	20454005
D00597	Acebutolol hydrochloride (JP17/USP); Sectral (TN)	CCCC(=O)Nc1ccc(OCC(O)CNC(C)C)c(C(C)=O)c1.Cl	6080568	C07677	6080568
D00598	Betaxolol hydrochloride (JP17/USP); Betoptic (TN); Kerlone (TN)	CC(C)NCC(O)COc1ccc(CCOCC2CC2)cc1.Cl	5182512	nan	5182512
D00599	Carteolol hydrochloride (JP17/USP); Cartrol (TN); Ocupress (TN)	CC(C)(C)NCC(O)COc1cccc2c1CCC(=O)N2.Cl	5784965	nan	5784965
D00600	Labetalol hydrochloride (JP17/USP); Normodyne (TN); Trandate (TN)	CC(CCc1ccccc1)NCC(O)c1ccc(O)c(C(N)=O)c1.Cl	5322652	nan	5322652
D00604	Clonidine hydrochloride (JP17/USP); Catapres (TN)	Cl.Clc1cccc(Cl)c1N=C1NCCN1	5652635	nan	5652635
D00606	Guanfacine hydrochloride (JAN/USP); Intuniv (TN); Tenex (TN)	Cl.N=C(N)NC(=O)Cc1c(Cl)cccc1Cl	6019938	nan	6019938
D00608	Doxazosin mesylate (USP); Doxazosin mesilate (JP17); Cardura (TN)	COc1cc2nc(N3CCN(C(=O)C4COc5ccccc5O4)CC3)nc(N)c2cc1OC.CS(=O)(=O)O	22255054, 7791129	nan	22255054, 7791129
D00609	Prazosin hydrochloride (JP17/USP); Minipress (TN)	COc1cc2nc(N3CCN(C(=O)c4ccco4)CC3)nc(N)c2cc1OC.Cl	4303561	nan	4303561
D00611	Mecamylamine hydrochloride (USP); Inversine (TN)	CNC1(C)C2CCC(C2)C1(C)C.Cl	30471017, 30471015	nan	30471015, 30471017
D00613	Fenoldopam mesylate (USP); Corlopam (TN)	CS(=O)(=O)O.Oc1ccc(C2CNCCc3c2cc(O)c(O)c3Cl)cc1	4119143	nan	4119143
D00614	Sodium nitroprusside (USP); Sodium nitroprusside hydrate (JAN); Nitropress (TN)	N#C[Fe-2](C#N)(C#N)(C#N)(C#N)N=O.O.O.[Na+].[Na+]	nan	C07695	C07695
D00615	Amlodipine besylate (USP); Amlodipine besilate (JP17); Norvasc (TN)	CCOC(=O)C1=C(COCCN)NC(C)=C(C(=O)OC)C1c1ccccc1Cl.O=S(=O)(O)c1ccccc1	8378713, 12288838, 12288839	nan	12288839, 12288838, 8378713
D00617	Nicardipine hydrochloride (JP17/USAN); Cardene (TN)	COC(=O)C1=C(C)NC(C)=C(C(=O)OCCN(C)Cc2ccccc2)C1c1cccc([N+](=O)[O-])c1.Cl	4286471	nan	4286471
D00618	Nisoldipine (JAN/USAN/INN); Sular (TN)	COC(=O)C1=C(C)NC(C)=C(C(=O)OCC(C)C)C1c1ccccc1[N+](=O)[O-]	454188	C07699	454188
D00619	Verapamil hydrochloride (JP17/USP); Calan (TN); Covera-hs (TN); Vasolan (TN); Verelan (TN)	COc1ccc(CCN(C)CCCC(C#N)(c2ccc(OC)c(OC)c2)C(C)C)cc1OC.Cl	3647093	nan	3647093
D00620	Benazepril hydrochloride (JAN/USP); Lotensin (TN)	CCOC(=O)C(CCc1ccccc1)NC1CCc2ccccc2N(CC(=O)O)C1=O.Cl	13349075	nan	13349075
D00626	Candesartan cilexetil (JP17/USP); Atacand (TN)	CCOc1nc2cccc(C(=O)OC(C)OC(=O)OC3CCCCC3)c2n1Cc1ccc(-c2ccccc2-c2nnn[nH]2)cc1	7328188	C07709	7328188
D00627	Telmisartan (JP17/USP/INN); Micardis (TN)	CCCc1nc2c(C)cc(-c3nc4ccccc4n3C)cc2n1Cc1ccc(-c2ccccc2C(=O)O)cc1	6624054	C07710	6624054
D00629	Nitrendipine (JP17/USAN/INN); Baypress (TN)	CCOC(=O)C1=C(C)NC(C)=C(C(=O)OC)C1c1cccc([N+](=O)[O-])c1	498823	C07713	498823
D00630	Isosorbide mononitrate (JP17/USP/INN); Imdur (TN); Ismo (TN)	O=[N+]([O-])OC1COC2C(O)COC12	11247603	nan	11247603
D00633	Dopamine hydrochloride (JP17/USP); Actopamin (TN); Intropin (TN)	Cl.NCCc1ccc(O)c(O)c1	3656720, 27030157	nan	3656720, 27030157
D00636	Amiodarone hydrochloride (JP17/USP); Ancaron (TN); Cordarone (TN); Nexterone (TN)	CCCCc1oc2ccccc2c1C(=O)c1cc(I)c(OCCN(CC)CC)c(I)c1.Cl	4776323	nan	4776323
D00637	Disopyramide phosphate (JAN/USP); Norpace (TN)	CC(C)N(CCC(C(N)=O)(c1ccccc1)c1ccccn1)C(C)C.O=P(O)(O)O	nan	C07740	C07740
D00638	Flecainide acetate (JP17/USP); Tambocor (TN)	CC(=O)O.O=C(NCC1CCCCN1)c1cc(OCC(F)(F)F)ccc1OCC(F)(F)F	4119882	nan	4119882
D00639	Mexiletine hydrochloride (JP17/USP); Mexitil (TN)	Cc1cccc(C)c1OCC(C)N.Cl	4209895	nan	4209895
D00640	Propafenone hydrochloride (JP17/USP); Rythmol (TN)	CCCNCC(O)COc1ccccc1C(=O)CCc1ccccc1.Cl	4343069	nan	4343069
D00641	Quinfamide (USAN/INN); Amenide (TN)	O=C(Oc1ccc2c(c1)CCCN2C(=O)C(Cl)Cl)c1ccco1	1554485	nan	1554485
D00644	Esmolol hydrochloride (JAN/USP); Brevibloc (TN)	COC(=O)CCc1ccc(OCC(O)CNC(C)C)cc1.Cl	5185568	nan	5185568
D00646	Tolterodine (USAN/INN)	Cc1ccc(O)c(C(CCN(C(C)C)C(C)C)c2ccccc2)c1	11567997	nan	11567997
D00647	Dofetilide (JAN/USP/INN); Tikosyn (TN)	CN(CCOc1ccc(NS(C)(=O)=O)cc1)CCc1ccc(NS(C)(=O)=O)cc1	3572833	C07751	3572833
D00650	Bendroflumethiazide (JAN/USP/INN); Naturetin (TN)	NS(=O)(=O)c1cc2c(cc1C(F)(F)F)NC(Cc1ccccc1)NS2(=O)=O	6579432, 373316, 6579433	C07758	6579432, 6579433, 373316
D00651	Benzthiazide (JAN/INN); Exna (TN)	NS(=O)(=O)c1cc2c(cc1Cl)N=C(CSCc1ccccc1)NS2(=O)=O	nan	C07759	C07759
D00652	Brinzolamide (JAN/USP/INN); Azopt (TN)	CCNC1CN(CCCOC)S(=O)(=O)c2sc(S(N)(=O)=O)cc21	9347335	nan	9347335
D00654	Hydroflumethiazide (JAN/USP/INN); Saluron (TN)	NS(=O)(=O)c1cc2c(cc1C(F)(F)F)NCNS2(=O)=O	342692	C07763	342692
D00655	Methazolamide (JAN/USP/INN); Neptazane (TN)	CC(=O)N=c1sc(S(N)(=O)=O)nn1C	232387	nan	232387
D00656	Methyclothiazide (JAN/USP/INN); Enduron (TN)	CN1C(CCl)Nc2cc(Cl)c(S(N)(=O)=O)cc2S1(=O)=O	6575846, 765361, 6575847	C07765	6575846, 765361, 6575847
D00657	Polythiazide (JAN/USAN/INN); Renese (TN)	CN1C(CSCC(F)(F)F)Nc2cc(Cl)c(S(N)(=O)=O)cc2S1(=O)=O	nan	C07766	C07766
D00658	Trichlormethiazide (JP17/USP/INN); Naqua (TN)	NS(=O)(=O)c1cc2c(cc1Cl)NC(C(Cl)Cl)NS2(=O)=O	629145, 6576311, 6576312	C07767	6576312, 629145, 6576311
D00659	Azelastine hydrochloride (JP17/USP); Astelin (TN)	CN1CCCC(n2nc(Cc3ccc(Cl)cc3)c3ccccc3c2=O)CC1.Cl	4834474	nan	4834474
D00669	Diphenhydramine hydrochloride (JP17/USP); Benadryl (TN)	CN(C)CCOC(c1ccccc1)c1ccccc1.Cl	3918132	C07784	3918132
D00670	Donepezil hydrochloride (JP17/USP); Aricept (TN)	COc1cc2c(cc1OC)C(=O)C(CC1CCN(Cc3ccccc3)CC1)C2.Cl	15039533, 7062905	nan	7062905, 15039533
D00671	Fexofenadine hydrochloride (JP17/USP); Allegra (TN)	CC(C)(C(=O)O)c1ccc(C(O)CCCN2CCC(C(O)(c3ccccc3)c3ccccc3)CC2)cc1.Cl	7900041	nan	7900041
D00673	Ranitidine hydrochloride (JP17/USP); Zantac (TN)	CNC(=C[N+](=O)[O-])NCCSCc1ccc(CN(C)C)o1.Cl	5196014	nan	5196014
D00674	Naratriptan hydrochloride (JAN/USP); Amerge (TN)	CNS(=O)(=O)CCc1ccc2[nH]cc(C3CCN(C)CC3)c2c1.Cl	7786629	nan	7786629
D00675	Rizatriptan benzoate (JAN/USP); Maxalt (TN)	CN(C)CCc1c[nH]c2ccc(Cn3cncn3)cc12.O=C(O)c1ccccc1	7066526	nan	7066526
D00676	Sumatriptan succinate (JAN/USP); Alsuma (TN); Imitrex (TN); Sumave dosepro (TN); Zecutity (TN)	CNS(=O)(=O)Cc1ccc2[nH]cc(CCN(C)C)c2c1.O=C(O)CCC(=O)O	5371868, 19611030	nan	19611030, 5371868
D00677	Granisetron hydrochloride (JAN/USP); Kytril (TN)	CN1C2CCCC1CC(NC(=O)c1nn(C)c3ccccc13)C2.Cl	15426874	nan	15426874
D00684	Bitolterol mesylate (USAN); Bitolterol mesilate (JAN); Tornalate (TN)	CS(=O)(=O)O.Cc1ccc(C(=O)Oc2ccc(C(O)CNC(C)(C)C)cc2OC(=O)c2ccc(C)cc2)cc1	4103660	nan	4103660
D00687	Salmeterol xinafoate (JAN/USP); Serevent (TN)	O=C(O)c1ccc2ccccc2c1O.OCc1cc(C(O)CNCCCCCCOCCCCc2ccccc2)ccc1O	9833043	nan	9833043
D00691	Dyphylline (USP); Diprophylline (JAN/INN); Lufyllin (TN)	Cn1c(=O)c2c(ncn2CC(O)CO)n(C)c1=O	284563	C07819	284563
D00693	Chlordiazepoxide hydrochloride (JAN/USP); Librium (TN)	CNC1=Nc2ccc(Cl)cc2C(c2ccccc2)=[N+]([O-])C1.Cl	3639552	nan	3639552
D00696	Midazolam hydrochloride (USAN); Versed (TN)	Cc1ncc2n1-c1ccc(Cl)cc1C(c1ccccc1F)=NC2.Cl	6580691, 13356957	nan	13356957, 6580691
D00697	Flumazenil (JAN/USP/INN); Romazicon (TN)	CCOC(=O)c1ncn2c1CN(C)C(=O)c1cc(F)ccc1-2	4763661	C07825	4763661
D00698	Aprobarbital (INN); Alurate (TN)	C=CCC1(C(C)C)C(=O)NC(=O)NC1=O	180858	C07826	180858
D00700	Mephobarbital (JAN/USP); Methylphenobarbital (INN); Mebaral (TN)	CCC1(c2ccccc2)C(=O)NC(=O)N(C)C1=O	256144	C07829	256144
D00701	Phenobarbital sodium (JAN/USP/INN); Luminal sodium (TN)	CCC1(c2ccccc2)C(=O)N=C([O-])NC1=O.[Na+]	3802044	nan	3802044
D00702	Buspirone hydrochloride (USP); Buspar (TN)	Cl.O=C1CC2(CCCC2)CC(=O)N1CCCCN1CCN(c2ncccn2)CC1	5369604	nan	5369604
D00703	Ethinamate (JAN/INN); Valmid (TN)	C#CC1(OC(N)=O)CCCCC1	1946056	C07832	1946056
D00704	Ethchlorvynol (JAN/USP/INN); Placidyl (TN)	C#CC(O)(C=CCl)CC	1702245	nan	1702245
D00705	Paraldehyde (USP); Paral (TN)	CC1OC(C)OC(C)O1	80142	C07834	80142
D00707	Fomepizole (JAN/USAN/INN); Antizol (TN)	Cc1cn[nH]c1	105204	C07837	105204
D00708	Ethotoin (JAN/USP/INN); Accenon (TN); Peganone (TN)	CCN1C(=O)NC(c2ccccc2)C1=O	188272	C07839	188272
D00709	Levetiracetam (JAN/USP/INN); Keppra (TN); E keppra (TN)	CCC(C(N)=O)N1CCCC1=O	1529106	nan	1529106
D00710	Valproate sodium (USAN); Sodium valproate (JP17); Depakene (TN); Selenica (TN)	CCCC(CCC)C(=O)[O-].[Na+]	4212221	nan	4212221
D00711	Ketamine hydrochloride (JP17/USP); Ketalar (TN)	CNC1(c2ccccc2Cl)CCCCC1=O.Cl	5318526, 28645686	C07843	5318526, 28645686
D00716	Clidinium bromide (USP/INN); Quarzan (TN)	C[N+]12CCC(CC1)C(OC(=O)C(O)(c1ccccc1)c1ccccc1)C2.[Br-]	4117570	nan	4117570
D00718	Flavoxate hydrochloride (JP17/USP); Urispas (TN)	Cc1c(-c2ccccc2)oc2c(C(=O)OCCN3CCCCC3)cccc2c1=O.Cl	6258688	nan	6258688
D00720	Mepenzolate bromide (JP17/INN); Cantil (TN)	C[N+]1(C)CCCC(OC(=O)C(O)(c2ccccc2)c2ccccc2)C1.[Br-]	3824099	nan	3824099
D00721	Methanthelinium bromide (INN); Methantheline bromide; Banthine (TN)	CC[N+](C)(CC)CCOC(=O)C1c2ccccc2Oc2ccccc21.[Br-]	3897811	nan	3897811
D00722	Oxybutynin chloride (USP); Oxybutynin hydrochloride (JAN); Ditropan (TN); Gelnique (TN)	CCN(CC)CC#CCOC(=O)C(O)(c1ccccc1)C1CCCCC1.Cl	4833152	nan	4833152
D00724	Rabeprazole sodium (JP17/USP); Aciphex (TN); Pariet (TN)	COCCCOc1ccnc(CS(=O)c2nc3ccccc3[n-]2)c1C.[Na+]	7561607	C07865	7561607
D00725	Dolasetron mesylate (USP); Anzemet (TN)	CS(=O)(=O)O.O=C(OC1CC2CC3CC(C1)N2CC3=O)c1c[nH]c2ccccc12	15516322	nan	15516322
D00726	Metoclopramide (JP17/INN); Elieten (TN); Terperan (TN)	CCN(CC)CCNC(=O)c1cc(Cl)c(N)cc1OC	1884366	C07868	1884366
D00728	Bismuth subsalicylate (JAN/USP); Pepto-bismol (TN)	O=C1O[Bi](O)Oc2ccccc21	nan	C07870	C07870
D00729	Loperamide hydrochloride (JAN/USP); Imodium (TN)	CN(C)C(=O)C(CCN1CCC(O)(c2ccc(Cl)cc2)CC1)(c1ccccc1)c1ccccc1.Cl	4087090	nan	4087090
D00730	Butamben (USP); 4-Aminobenzoic acid butyl; Butesin (TN)	CCCCOC(=O)c1ccc(N)cc1	1211465	C07875	1211465
D00732	Chloroprocaine hydrochloride (USP); Clorotekal (TN); Nesacaine (TN)	CCN(CC)CCOC(=O)c1ccc(N)cc1Cl.Cl	3918412	nan	3918412
D00733	Dibucaine (USP); Cinchocaine (INN); Nupercaine (TN)	CCCCOc1cc(C(=O)NCCN(CC)CC)c2ccccc2n1	275489	C07879	275489
D00734	Ursodiol (USP); Ursodeoxycholic acid (JP17/INN); Actigall (TN); Urso (TN)	CC(CCC(=O)O)C1CCC2C3C(O)CC4CC(O)CCC4(C)C3CCC12C	18809630	nan	18809630
D00735	Dyclonine hydrochloride (USP); Dyclone (TN); Dyclopro (TN)	CCCCOc1ccc(C(=O)CCN2CCCCC2)cc1.Cl	3744808	nan	3744808
D00738	Mepivacaine hydrochloride (JP17/USP); Carbocaine (TN); Polocaine (TN); Scandonest plain (TN)	Cc1cccc(C)c1NC(=O)C1CCCCN1C.Cl	3734352	nan	3734352
D00739	Pramoxine hydrochloride (USP); Pramocaine hydrochloride; Tronothane (TN)	CCCCOc1ccc(OCCCN2CCOCC2)cc1.Cl	28570152, 3740564	nan	28570152, 3740564
D00740	Procaine hydrochloride (JP17/USP); Novocain (TN)	CCN(CC)CCOC(=O)c1ccc(N)cc1.Cl	28569925, 3917802	C07894	28569925, 3917802
D00741	Tetracaine hydrochloride (JP17/USP); Protocaine hydrochloride (TN)	CCCCNc1ccc(C(=O)OCCN(C)C)cc1.Cl	3918400	nan	3918400
D00743	Naphazoline hydrochloride (JP17/USP); Albalon (TN); Vasocon (TN)	Cl.c1ccc2c(CC3=NCCN3)cccc2c1	nan	C07898	C07898
D00744	Pemoline (JAN/USAN/INN); Cylert (TN)	NC1=NC(=O)C(c2ccccc2)O1	151559	C07899	151559
D00749	Leflunomide (JAN/USP/INN); Arava (TN)	Cc1oncc1C(=O)Nc1ccc(C(F)(F)F)cc1	4323174	C07905	4323174
D00750	Levamisole hydrochloride (USP); Ergamisol (TN)	Cl.c1ccc(C2CN3CCSC3=N2)cc1	4358987, 5315963	C11337	5315963, 4358987
D00752	Mycophenolate mofetil (JAN/USP); Cellcept (TN)	COc1c(C)c2c(c(O)c1CC=C(C)CCC(=O)OCCN1CCOCC1)C(=O)OC2	14419508	nan	14419508
D00753	Sirolimus (JAN/USAN/INN); Rapamune (TN); Rapamycin (TN)	COC1CC2CCC(C)C(O)(O2)C(=O)C(=O)N2CCCCC2C(=O)OC(C(C)CC2CCC(O)C(OC)C2)CC(=O)C(C)C=C(C)C(O)C(OC)C(=O)C(C)CC(C)C=CC=CC=C1C	14395811, 604010	nan	604010, 14395811
D00754	Thalidomide (JAN/USP/INN); Thalomid (TN); Thaled (TN)	O=C1CCC(N2C(=O)c3ccccc3C2=O)C(=O)N1	30233	C07910	30233
D00762	Metyrosine (USP); Metirosine (JAN/INN); Demser (TN)	CC(N)(Cc1ccc(O)cc1)C(=O)O	2938704, 6891851	nan	2938704, 6891851
D00768	Carisoprodol (JAN/USP/INN); Soma (TN)	CCCC(C)(COC(N)=O)COC(=O)NC(C)C	1791537	C07927	1791537
D00769	Clopidogrel bisulfate (USP); Clopidogrel sulfate (JP17); Clopidogrel sulfate tablets (JP17); Clopidogrel hydrogen sulphate; Isocover (TN); Plavix (TN)	COC(=O)C(c1ccccc1Cl)N1CCc2sccc2C1.O=S(=O)(O)O	18393781, 14227954, 14367388, 14286849	nan	18393781, 14367388, 14227954, 14286849
D00770	Chlorphenesin carbamate (JP17/USAN); Maolate (TN)	NC(=O)OCC(O)COc1ccc(Cl)cc1	1978575	C07930	1978575
D00771	Chlorzoxazone (JAN/USP/INN); Paraflex (TN)	Oc1nc2cc(Cl)ccc2o1	638882	C07931	638882
D00772	Cyclobenzaprine hydrochloride (USP); Flexeril (TN)	CN(C)CCC=C1c2ccccc2C=Cc2ccccc21.Cl	6247987	nan	6247987
D00773	Metaxalone (USP/INN); Skelaxin (TN)	Cc1cc(C)cc(OCC2CNC(=O)O2)c1	884592	C07934	884592
D00775	Riluzole (JAN/USP/INN); Rilutek (TN)	Nc1nc2ccc(OC(F)(F)F)cc2s1	748759	C07937	748759
D00776	Tizanidine hydrochloride (JP17/USP); Zanaflex (TN)	Cl.Clc1ccc2nsnc2c1NC1=NCCN1	21931939, 6022764	nan	21931939, 6022764
D00777	Amantadine hydrochloride (JP17/USP); Symmetrel (TN); Gocovri (TN); Osmolex er (TN)	Cl.NC12CC3CC(CC(C3)C1)C2	4198854, 30400578	C07939	30400578, 4198854
D00779	Biperiden (JAN/USP/INN); Akineton (TN)	OC(CCN1CCCCC1)(c1ccccc1)C1CC2C=CC1C2	nan	C07941	C07941
D00781	Entacapone (JP17/USP/INN); Comtan (TN)	CCN(CC)C(=O)C(C#N)=Cc1cc(O)c(O)c([N+](=O)[O-])c1	14523938	nan	14523938
D00784	Ropinirole hydrochloride (JAN/USP); Requip (TN)	CCCN(CCC)CCc1cccc2c1CC(=O)N2.Cl	6019221	nan	6019221
D00786	Tolcapone (JAN/USP/INN); Tasmar (TN)	Cc1ccc(C(=O)c2cc(O)c(O)c([N+](=O)[O-])c2)cc1	8151577	C07949	8151577
D00787	Trihexyphenidyl hydrochloride (JP17/USP); Artane (TN)	Cl.OC(CCN1CCCCC1)(c1ccccc1)C1CCCCC1	5667971	nan	5667971
D00789	Chlorpromazine hydrochloride (JP17/USP); Sonazine (TN)	CN(C)CCCN1c2ccccc2Sc2ccc(Cl)cc21.Cl	3779989	C07952	3779989
D00790	Chlorprothixene (JAN/USAN/INN); Taractan (TN)	CN(C)CCC=C1c2ccccc2Sc2ccc(Cl)cc21	89898	nan	89898
D00792	Fluphenazine enanthate (JP17/USP); Prolixin enanthate (TN)	CCCCCCC(=O)OCCN1CCN(CCCN2c3ccccc3Sc3ccc(C(F)(F)F)cc32)CC1	nan	C07955	C07955
D00793	Fluphenazine decanoate (JAN/USP); Prolixin decanoate (TN)	CCCCCCCCCC(=O)OCCN1CCN(CCCN2c3ccccc3Sc3ccc(C(F)(F)F)cc32)CC1	nan	C07956	C07956
D00795	Mesoridazine besylate (USP); Serentil (TN)	CN1CCCCC1CCN1c2ccccc2Sc2ccc(S(C)=O)cc21.O=S(=O)(O)c1ccccc1	4121451	nan	4121451
D00796	Molindone hydrochloride (USP); Moban (TN)	CCc1c(C)[nH]c2c1C(=O)C(CN1CCOCC1)CC2.Cl	5182754, 26676321	nan	26676321, 5182754
D00797	Promazine hydrochloride (USP); Sparine (TN)	CN(C)CCCN1c2ccccc2Sc2ccccc21.Cl	3753230	nan	3753230
D00798	Thioridazine hydrochloride (JP17/USP); Mellaril (TN)	CSc1ccc2c(c1)N(CCC1CCCCN1C)c1ccccc1S2.Cl	4170703	nan	4170703
D00800	Triflupromazine hydrochloride (JAN/USP); Vesprin (TN)	CN(C)CCCN1c2ccccc2Sc2ccc(C(F)(F)F)cc21.Cl	3801519	nan	3801519
D00801	Lithium carbonate (JP17/USP); Eskalith (TN); Lithobid (TN)	O=C([O-])[O-].[Li+].[Li+]	nan	C07964	C07964
D00802	Bithionol (JAN/INN); Bithin (TN)	Oc1c(Cl)cc(Cl)cc1Sc1cc(Cl)cc(Cl)c1O	2003535	C07967	2003535
D00805	Metrifonate (USP/INN); Trichlorfon (USAN)	COP(=O)(OC)C(O)C(Cl)(Cl)Cl	1709434	C07971	1709434
D00809	Amitriptyline hydrochloride (JP17/USP); Elavil (TN)	CN(C)CCC=C1c2ccccc2CCc2ccccc21.Cl	4164595	nan	4164595
D00810	Choline salicylate (JAN/USAN/INN); Arthropan (TN)	C[N+](C)(C)CCO.O=C([O-])c1ccccc1O	4059384	nan	4059384
D00811	Clomipramine hydrochloride (JP17/USP); Anafranil (TN)	CN(C)CCCN1c2ccccc2CCc2ccc(Cl)cc21.Cl	4168494	nan	4168494
D00812	Desipramine hydrochloride (JAN/USP); Norpramin (TN)	CNCCCN1c2ccccc2CCc2ccccc21.Cl	4166006	nan	4166006
D00813	Ketorolac tromethamine (USP); Acular (TN); Toradol (TN)	NC(CO)(CO)CO.O=C(c1ccccc1)c1ccc2n1CCC2C(=O)O	6463165	nan	6463165
D00814	Doxepin hydrochloride (USP); Sinequan (TN); Zonalon (TN)	CN(C)CCC=C1c2ccccc2COc2ccccc21.Cl	5463221	nan	5463221
D00815	Imipramine hydrochloride (JP17/USP); Tofranil (TN)	CN(C)CCCN1c2ccccc2CCc2ccccc21.Cl	22216828, 3576963	C07982	3576963, 22216828
D00816	Nortriptyline hydrochloride (JP17/USP/INN); Pamelor (TN)	CNCCC=C1c2ccccc2CCc2ccccc21.Cl	4163872	nan	4163872
D00817	Bupropion hydrochloride (JAN/USP); Wellbutrin (TN); Zyban (TN)	CC(NC(C)(C)C)C(=O)c1cccc(Cl)c1.Cl	6161273	nan	6161273
D00818	Maprotiline hydrochloride (JP17/USP); Ludiomil (TN)	CNCCCC12CCC(c3ccccc31)c1ccccc12.Cl	5463242	nan	5463242
D00819	Nefazodone hydrochloride (USP); Serzone (TN)	CCc1nn(CCCN2CCN(c3cccc(Cl)c3)CC2)c(=O)n1CCOc1ccccc1.Cl	4636943	nan	4636943
D00820	Trazodone hydrochloride (JAN/USP); Desyrel (TN)	Cl.O=c1n(CCCN2CCN(c3cccc(Cl)c3)CC2)nc2ccccn12	5688374	nan	5688374
D00821	Venlafaxine hydrochloride (JAN/USP); Effexor (TN)	COc1ccc(C(CN(C)C)C2(O)CCCCC2)cc1.Cl	21896695, 4240401	nan	21896695, 4240401
D00822	Citalopram hydrobromide (USP); Celexa (TN)	Br.CN(C)CCCC1(c2ccc(F)cc2)OCc2cc(C#N)ccc21	5368282, 28570131	nan	5368282, 28570131
D00823	Fluoxetine hydrochloride (JAN/USP); Prozac (TN)	CNCCC(Oc1ccc(C(F)(F)F)cc1)c1ccccc1.Cl	6759273, 28570032	nan	6759273, 28570032
D00825	Sertraline hydrochloride (JAN/USP); Zoloft (TN)	CNC1CCC(c2ccc(Cl)c(Cl)c2)c2ccccc21.Cl	14351130, 14328239, 14283314	nan	14328239, 14351130, 14283314
D00830	Furazolidone (USP/INN); Furoxone (TN)	O=C1OCCN1N=Cc1ccc([N+](=O)[O-])o1	384794	nan	384794
D00831	Mefloquine hydrochloride (JP17/USP); Lariam (TN)	Cl.OC(c1cc(C(F)(F)F)nc2c(C(F)(F)F)cccc12)C1CCCCN1	6836041	nan	6836041
D00832	Melarsoprol (INN); Mel B (TN)	Nc1nc(N)nc(Nc2ccc([As]3SCC(CO)S3)cc2)n1	1038235	C08001	1038235
D00833	Nifurtimox (USAN/INN); Lampit (TN)	CC1CS(=O)(=O)CCN1N=Cc1ccc([N+](=O)[O-])o1	1223783	nan	1223783
D00835	Alfentanil hydrochloride (USP); Alfenta (TN)	CCC(=O)N(c1ccccc1)C1(COC)CCN(CCn2nnn(CC)c2=O)CC1.Cl.O	5707676	nan	5707676
D00839	Hydromorphone hydrochloride (JAN/USP); Dilaudid (TN); Exalgo (TN); Palladone (TN)	CN1CCC23c4c5ccc(O)c4OC2C(=O)CCC3C1C5.Cl	19215663	nan	19215663
D00845	Sufentanil citrate (USP); Dsuvia (TN); Sufenta (TN)	CCC(=O)N(c1ccccc1)C1(COC)CCN(CCc2cccs2)CC1.O=C(O)CC(O)(CC(=O)O)C(=O)O	4122065	nan	4122065
D00856	Methenamine mandelate (USP); Hexamine mandelate (JAN); Mandelamine (TN)	C1N2CN3CN1CN(C2)C3.O=C(O)C(O)c1ccccc1	3922182	nan	3922182
D00857	Benzalkonium chloride (JP17/NF/INN); Zephiran chloride (TN)	[*][N+](C)(C)Cc1ccccc1.[Cl-]	nan	C08037	C08037
D00859	Hexachlorophene (USP/INN); Phisohex (TN)	Oc1c(Cl)cc(Cl)c(Cl)c1Cc1c(O)c(Cl)cc(Cl)c1Cl	2064407	C08039	2064407
D00862	Nitrofurazone (USP); Nitrofural (INN); Furacin (TN)	NC(=O)NN=Cc1ccc([N+](=O)[O-])o1	8135840	nan	8135840
D00864	Thimerosal (JAN/USP); Thiomersal (INN); Merthiolate (TN)	CC[Hg]Sc1ccccc1C(=O)[O-].[Na+]	8169555	nan	8169555
D00866	Kanamycin sulfate (USP); Kanamycin monosulfate (JP17); Kantrex (TN)	NCC1OC(OC2C(N)CC(N)C(OC3OC(CO)C(O)C(N)C3O)C2O)C(O)C(O)C1O.O=S(=O)(O)O	18153648	nan	18153648
D00870	Sulfamethizole (JP17/USP/INN); Thiosulfil (TN)	Cc1nnc(NS(=O)(=O)c2ccc(N)cc2)s1	255002	C08050	255002
D00872	Cinoxacin (JP17/USP/INN); CINX; Cinobac (TN)	CCn1nc(C(=O)O)c(=O)c2cc3c(cc21)OCO3	1084304	C08052	1084304
D00873	Lomefloxacin hydrochloride (JAN/USAN); LFLX; Maxaquin (TN)	CCn1cc(C(=O)O)c(=O)c2cc(F)c(N3CCNC(C)C3)c(F)c21.Cl	7506829	C08053	7506829
D00874	Moxifloxacin hydrochloride (JAN/USP); MFLX; Avelox (TN); Vigamox (TN)	COc1c(N2CC3CCCNC3C2)c(F)cc2c(=O)c(C(=O)O)cn(C3CC3)c12.Cl	nan	C08054	C08054
D00877	Cycloserine (JP17/USP/INN); Seromycin (TN)	NC1CONC1=O	80800, 4658623	C06682	80800, 4658623
D00880	Butoconazole nitrate (USP); Femstat (TN); Gynazole-1 (TN)	Clc1ccc(CCC(Cn2ccnc2)Sc2c(Cl)cccc2Cl)cc1.O=[N+]([O-])O	6366645	C08066	6366645
D00881	Econazole nitrate (JAN/USP); Ecoza (TN); Spectazole (TN)	Clc1ccc(COC(Cn2ccnc2)c2ccc(Cl)cc2Cl)cc1.O=[N+]([O-])O	4836249	C08069	4836249
D00882	Miconazole nitrate (JP17/USP); MCZ; Micatin (TN); Monistat (TN)	Clc1ccc(COC(Cn2ccnc2)c2ccc(Cl)cc2Cl)c(Cl)c1.O=[N+]([O-])O	4225531	C08070	4225531
D00886	Sulconazole nitrate (JAN/USP); Exelderm (TN)	Clc1ccc(CSC(Cn2ccnc2)c2ccc(Cl)cc2Cl)cc1.O=[N+]([O-])O	7965210	nan	7965210
D00890	Tioconazole (JAN/USP/INN); Vagistat-1 (TN)	Clc1ccc(C(Cn2ccnc2)OCc2ccsc2Cl)c(Cl)c1	573867	C08082	573867
D00893	Pravastatin sodium (JP17/USP); CS-514; Pravachol (TN)	CCC(C)C(=O)OC1CC(O)C=C2C=CC(C)C(CCC(O)CC(O)CC(=O)[O-])C21.[Na+]	20165623	nan	20165623
D00895	Delavirdine mesylate (USAN); Delavirdine mesilate (JAN); Rescriptor (TN)	CC(C)Nc1cccnc1N1CCN(C(=O)c2cc3cc(NS(C)(=O)=O)ccc3[nH]2)CC1.CS(=O)(=O)O	nan	C08087	C08087
D00896	Efavirenz (JAN/USP/INN); Sustiva (TN)	O=C1Nc2ccc(Cl)cc2C(C#CC2CC2)(C(F)(F)F)O1	21279290, 8395997	nan	8395997, 21279290
D00898	Dienestrol (USP/INN); DV (TN)	CC=C(C(=CC)c1ccc(O)cc1)c1ccc(O)cc1	2053692	nan	2053692
D00901	Rimantadine hydrochloride (USP); Flumadine (TN)	CC(N)C12CC3CC(CC(C3)C1)C2.Cl	3623918	C08094	3623918
D00903	Diclofenac potassium (USP); Cambia (TN); Cataflam (TN); Zipsor (TN)	O=C([O-])Cc1ccccc1Nc1c(Cl)cccc1Cl.[K+]	6625757	nan	6625757
D00904	Diclofenac sodium (JP17/USP); Solaraze (TN); Voltaren (TN)	O=C([O-])Cc1ccccc1Nc1c(Cl)cccc1Cl.[Na+]	3581138	nan	3581138
D00906	Cephalexin (USP); Cephalexin monohydrate; Cefalexin; CEX; Keftab (TN); Panixine disperdose (TN)	CC1=C(C(=O)O)N2C(=O)C(NC(=O)C(N)c3ccccc3)C2SC1.O	18200722, 5788593	nan	5788593, 18200722
D00907	Cephalothin sodium (USP); Cefalotin sodium (JP17); CET; Keflin (TN)	CC(=O)OCC1=C(C(=O)[O-])N2C(=O)C(NC(=O)Cc3cccs3)C2SC1.[Na+]	1095411	nan	1095411
D00909	Cefamandole nafate (USP); Mandol (TN)	Cn1nnnc1SCC1=C(C(=O)[O-])N2C(=O)C(NC(=O)C(OC=O)c3ccccc3)C2SC1.[Na+]	1064403	nan	1064403
D00915	Cefuroxime sodium (JAN/USP); CXM; Zinacef (TN)	CON=C(C(=O)NC1C(=O)N2C(C(=O)[O-])=C(COC(N)=O)CSC12)c1ccco1.[Na+]	18230749, 14746872	nan	18230749, 14746872
D00919	Cefotaxime sodium (JP17/USP); CTX; Claforan (TN)	CON=C(C(=O)NC1C(=O)N2C(C(=O)[O-])=C(COC(C)=O)CSC12)c1csc(N)n1.[Na+]	18187456, 18230763	nan	18187456, 18230763
D00932	Calcium carbonate (USP); Precipitated calcium carbonate (JP17); Calcium carbonate, precipitated (JAN); Cal-sup (TN)	O=C([O-])[O-].[Ca+2]	16921266, 17185452, 17019707, 15903745, 23900174, 28351185, 17409866, 27695822, 23045493, 28509460, 26773530, 17137849, 15914287, 16770788, 16635684, 31525121, 15431625, 22972029, 24577709, 23900175, 26694522, 27702168, 16534473, 8008338, 16835257, 23044853, 16843982, 22972028, 16532903	C08129	15903745, 16534473, 16770788, 15431625, 24577709, 17137849, 22972029, 15914287, 23900175, 26694522, 28509460, 17019707, 8008338, 16635684, 16835257, 16532903, 16843982, 22972028, 16921266, 23044853, 23045493, 17409866, 31525121, 27702168, 17185452, 28351185, 26773530, 27695822, 23900174
D00938	Tricalcium phosphate; Posture (TN)	O=P([O-])([O-])[O-].O=P([O-])([O-])[O-].[Ca+2].[Ca+2].[Ca+2]	nan	C08136	C08136
D00942	Risedronate sodium (USP); Actonel (TN)	O=P([O-])(O)C(O)(Cc1cccnc1)P(=O)(O)O.[Na+]	6361090	nan	6361090
D00943	Sodium fluoride (JAN/USP); Fluorinse (TN)	[F-].[Na+]	nan	C08142	C08142
D00944	Metformin hydrochloride (JP17/USP); Glucophage (TN)	CN(C)C(=N)NC(=N)N.Cl	20891186, 32093718, 30669166, 3626131	nan	3626131, 20891186, 30669166, 32093718
D00945	Pioglitazone hydrochloride (JP17/USP); Actos (TN)	CCc1ccc(CCOc2ccc(CC3SC(=O)NC3=O)cc2)nc1.Cl	27504417, 3579575	nan	27504417, 3579575
D00946	Diethylstilbestrol diphosphate (USP); Fosfestrol (JAN/INN); Stilphostrol (TN)	CCC(=C(CC)c1ccc(OP(=O)(O)O)cc1)c1ccc(OP(=O)(O)O)cc1	2067509	nan	2067509
D00947	Linezolid (JAN/USAN/INN); Zyvox (TN)	CC(=O)NCC1CN(c2ccc(N3CCOCC3)c(F)c2)C(=O)O1	9426017	nan	9426017
D00960	Anastrozole (JAN/USP/INN); Arimidex (TN)	CC(C)(C#N)c1cc(Cn2cncn2)cc(C(C)(C)C#N)c1	8005958	C08159	8005958
D00961	Bicalutamide (JAN/USP/INN); Casodex (TN)	CC(O)(CS(=O)(=O)c1ccc(F)cc1)C(=O)Nc1ccc(C#N)c(C(F)(F)F)c1	5364666	nan	5364666
D00962	Clomiphene citrate (USP); Clomifene citrate (JP17); Clomid (TN); Serophene (TN)	CCN(CC)CCOc1ccc(C(=C(Cl)c2ccccc2)c2ccccc2)cc1.O=C(O)CC(O)(CC(=O)O)C(=O)O	5223439	nan	5223439
D00964	Letrozole (JAN/USP/INN); Femara (TN)	N#Cc1ccc(C(c2ccc(C#N)cc2)n2cncn2)cc1	6813913	C08163	6813913
D00965	Nilutamide (USAN/INN); Nilandron (TN)	CC1(C)NC(=O)N(c2ccc([N+](=O)[O-])c(C(F)(F)F)c2)C1=O	841906	C08164	841906
D00969	Meloxicam (JAN/USP/INN); Mobic (TN)	Cc1cnc(NC(=O)C2=C(O)c3ccccc3S(=O)(=O)N2C)s1	5886369	C08169	5886369
D00970	Naproxen sodium (USP); Anaprox (TN)	COc1ccc2cc(C(C)C(=O)[O-])ccc2c1.[Na+]	4282250, 7278640, 13171293	nan	4282250, 13171293, 7278640
D00971	Sodium thiosalicylate; Thiosalicylic acid sodium salt; Rexolate (TN)	O=C([O-])c1ccccc1S.[Na+]	4924311	C08171	4924311
D00974	Deximafen (USAN/INN)	c1ccc(C2CN=C3NCCN32)cc1	519342	nan	519342
D00983	Triamcinolone acetonide (JP17/USP); Azmacort (TN); Kenalog (TN); Nasacort (TN)	CC1(C)OC2CC3C4CCC5=CC(=O)C=CC5(C)C4(F)C(O)CC3(C)C2(C(=O)CO)O1	362962	nan	362962
D00993	Meclofenoxate (INN)	CN(C)CCOC(=O)COc1ccc(Cl)cc1	1914094	C08195	1914094
D00994	Edrophonium chloride (JP17/USP/INN); Enlon (TN); Tensilon (TN)	CC[N+](C)(C)c1cccc(O)c1.[Cl-]	3748734	nan	3748734
D00995	Neostigmine bromide (JAN/USP/INN); Vagostigmin (TN)	CN(C)C(=O)Oc1cccc([N+](C)(C)C)c1.[Br-]	3640678	C08197	3640678
D00996	Epinephrine hydrochloride (JAN); Adrenalin chloride (TN)	CNCC(O)c1ccc(O)c(O)c1.Cl	4019338	nan	4019338
D00997	Tolazoline hydrochloride (JAN/USP); Priscoline (TN)	Cl.c1ccc(CC2=NCCN2)cc1	3569031	nan	3569031
D00998	Neostigmine methylsulfate (JP17/USP); Bloxiverz (TN); Prostigmin (TN)	CN(C)C(=O)Oc1cccc([N+](C)(C)C)c1.COS(=O)(=O)[O-]	3848275	C08200	3848275
D00999	Acetylcholine chloride (JP17/USP/INN); Miochol (TN)	CC(=O)OCC[N+](C)(C)C.[Cl-]	3571875	C08201	3571875
D01000	Bethanechol chloride (JP17/USP); Urecholine (TN)	CC(C[N+](C)(C)C)OC(N)=O.[Cl-]	3731819	C08202	3731819
D01002	Cyclopentolate hydrochloride (JP17/USP); Cyclogyl (TN)	CN(C)CCOC(=O)C(c1ccccc1)C1(O)CCCC1.Cl	3760509	nan	3760509
D01004	Homatropine hydrobromide (JP17/USP); Isopto homatropine (TN)	Br.CN1C2CCC1CC(OC(=O)C(O)c1ccccc1)C2	4166020	nan	4166020
D01005	Isopropamide iodide (JAN/USP/INN); Darbid (TN)	CC(C)[N+](C)(CCC(C(N)=O)(c1ccccc1)c1ccccc1)C(C)C.[I-]	3816406	nan	3816406
D01007	Propiverine hydrochloride (JP17); Bup-4 (TN); Mictonorm (TN)	CCCOC(C(=O)OC1CCN(C)CC1)(c1ccccc1)c1ccccc1.Cl	5368813	nan	5368813
D01008	Apraclonidine hydrochloride (JAN/USP); Iopidine (TN)	Cl.Nc1cc(Cl)c(NC2=NCCN2)c(Cl)c1	8802997	nan	8802997
D01013	Diatrizoate sodium (USP); Sodium amidotrizoate (INN); Urovist sodium (TN)	CC(=O)Nc1c(I)c(NC(C)=O)c(I)c(C(=O)[O-])c1I.[Na+]	4082984	nan	4082984
D01014	Iopanoic acid (JAN/USP/INN); Telepaque (TN)	CCC(Cc1c(I)cc(I)c(N)c1I)C(=O)O	2220381	C08217	2220381
D01017	Dipivefrin hydrochloride (JAN/USP); Propine (TN)	CNCC(O)c1ccc(OC(=O)C(C)(C)C)c(OC(=O)C(C)(C)C)c1.Cl	6458483	nan	6458483
D01020	Methoxamine hydrochloride (JAN); Vasoxyl (TN)	COc1ccc(OC)c(C(O)C(C)N)c1.Cl	6318453	nan	6318453
D01021	Naphazoline nitrate (JP17); Privine (TN)	O=[N+]([O-])O.c1ccc2c(CC3=NCCN3)cccc2c1	3779329	nan	3779329
D01023	Tetrahydrozoline hydrochloride (JAN/USP); Tyzine (TN)	Cl.c1ccc2c(c1)CCCC2C1=NCCN1	3725065	nan	3725065
D01024	Tamsulosin hydrochloride (JP17/USP); Flomax (TN); Harnal (TN)	CCOc1ccccc1OCCNC(C)Cc1ccc(OC)c(S(N)(=O)=O)c1.Cl	6994038	nan	6994038
D01025	Levobunolol hydrochloride (JAN/USP); Betagan (TN)	CC(C)(C)NCC(O)COc1cccc2c1CCCC2=O.Cl	6579687	nan	6579687
D01028	Ticlopidine hydrochloride (JP17/USP); Ticlid (TN)	Cl.Clc1ccccc1CN1CCc2sccc2C1	4037097	nan	4037097
D01034	Trioxsalen (USP); Trioxysalen (JAN/INN); Trisoralen (TN)	Cc1cc2cc3c(C)cc(=O)oc3c(C)c2o1	8277298, 221723	C09314	221723, 8277298
D01036	Noscapine (JP17/USP/INN); Noscapine (TN)	COc1ccc2c(c1OC)C(=O)OC2C1c2c(cc3c(c2OC)OCO3)CCN1C	99930, 4727807, 4727806	nan	99930, 4727807, 4727806
D01037	1,4-Dimethyl-7-isopropylazulene (JAN); Guaiazulene; Azunol (TN)	Cc1ccc(C(C)C)cc2c(C)ccc1-2	1365001	C09675	1365001
D01039	Thymol (JP17/NF); Thymol (TN)	Cc1ccc(C(C)C)c(O)c1	1907135	C09908	1907135
D01041	Sparteine (INN)	C1CCN2CC3CC(CN4CCCCC34)C2C1	17862865, 19232127, 17942918, 19025745, 21562353, 608418	nan	17862865, 21562353, 19232127, 19025745, 17942918, 608418
D01042	Fipronil (JAN)	N#Cc1nn(-c2c(Cl)cc(C(F)(F)F)cc2Cl)c(N)c1S(=O)C(F)(F)F	8090115	C11099	8090115
D01044	Flupentixol (INN); Flupenthixol; Depixol (TN)	OCCN1CCN(CCC=C2c3ccccc3Sc3ccc(C(F)(F)F)cc32)CC1	631526	nan	631526
D01045	Sodium lauryl sulfate (JP17/NF)	CCCCCCCCCCCCOS(=O)(=O)[O-].[Na+]	3599286, 27086668	C11166	3599286, 27086668
D01046	Gentian violet (USP); Methylrosanilinium chloride (JP17/INN); Methylrosaniline chloride; Crystal violet; Genapax (TN)	CN(C)c1ccc(C(=C2C=CC(=[N+](C)C)C=C2)c2ccc(N(C)C)cc2)cc1.[Cl-]	3580948	nan	3580948
D01047	Sulfathiazole (USP/INN)	Nc1ccc(S(=O)(=O)Nc2nccs2)cc1	226178	C11169	226178
D01049	Nimesulide (JAN/INN)	CS(=O)(=O)Nc1ccc([N+](=O)[O-])cc1Oc1ccccc1	2421175	nan	2421175
D01050	Nifuratel (USAN); Macmiror (TN)	CSCC1CN(N=Cc2ccc([N+](=O)[O-])o2)C(=O)O1	842878	nan	842878
D01051	Spiperone (JAN/USAN); Spiropitan (TN)	O=C(CCCN1CCC2(CC1)C(=O)NCN2c1ccccc1)c1ccc(F)cc1	632204	nan	632204
D01053	Penicillin G potassium (USP); Benzylpenicillin potassium (JP17); Pfizerpen (TN)	CC1(C)SC2C(NC(=O)Cc3ccccc3)C(=O)N2C1C(=O)[O-].[K+]	1090917	nan	1090917
D01055	Emivirine (USAN/INN); Coactinon (TN)	CCOCn1c(Cc2ccccc2)c(C(C)C)c(=O)[nH]c1=O	7340168	nan	7340168
D01056	Benzbromarone (JP17/USAN/INN); Uroleap (TN)	CCc1oc2ccccc2c1C(=O)c1cc(Br)c(O)c(Br)c1	273668	nan	273668
D01059	Nimustine hydrochloride (JAN); Nidran (TN)	Cc1ncc(CNC(=O)N(CCCl)N=O)c(N)n1.Cl	nan	C11276	C11276
D01062	Cetylpyridinium chloride (USP); Cetylpyridinium chloride hydrate (JAN); Sprol (TN)	CCCCCCCCCCCCCCCC[n+]1ccccc1.O.[Cl-]	17134807	C11307	17134807
D01065	Ubidecarenone (JP17/INN); Adelir (TN)	COC1=C(OC)C(=O)C(CC=C(C)CCC=C(C)CCC=C(C)CCC=C(C)CCC=C(C)CCC=C(C)CCC=C(C)CCC=C(C)CCC=C(C)CCC=C(C)C)=C(C)C1=O	1900140	nan	1900140
D01071	Hexobarbital (JAN/INN)	CN1C(=O)NC(=O)C(C)(C2=CCCCC2)C1=O	253102	C11723	253102
D01085	Saccharin (JP17/NF); Sweeta (TN)	O=C1NS(=O)(=O)c2ccccc21	6888	C12283	6888
D01086	Ethyl vanillin (NF)	CCOc1cc(C=O)ccc1O	1073761	nan	1073761
D01087	Methyl salicylate (JP17/NF); Methyl salicylate (TN)	COC(=O)c1ccccc1O	10253242, 971516	C12305	10253242, 971516
D01088	Pemirolast potassium (JP17/USAN); Alamast (TN); Alegysal (TN); Pemilaston (TN)	Cc1cccn2c(=O)c(-c3nnn[n-]3)cnc12.[K+]	8097604	nan	8097604
D01090	Pamicogrel (JAN/INN)	CCOC(=O)Cn1cccc1-c1nc(-c2ccc(OC)cc2)c(-c2ccc(OC)cc2)s1	6162955	nan	6162955
D01092	Lanoconazole (JP17/INN); Latoconazole; Astat (TN)	N#CC(=C1SCC(c2ccccc2Cl)S1)n1ccnc1	15116688	nan	15116688
D01093	Butenafine hydrochloride (JP17/USAN); Mentax (TN); Volley (TN)	CN(Cc1ccc(C(C)(C)C)cc1)Cc1cccc2ccccc12.Cl	11343366	C12490	11343366
D01094	Pyrrolnitrin (JP17/USAN/INN)	O=[N+]([O-])c1c(Cl)cccc1-c1c[nH]cc1Cl	1287646	C12491	1287646
D01097	Lazabemide hydrochloride (JAN/USAN); Tempium (TN)	Cl.NCCNC(=O)c1ccc(Cl)cn1	6668812	nan	6668812
D01101	Bromperidol (JAN/USAN/INN); Impromen (TN)	O=C(CCCN1CCC(O)(c2ccc(Br)cc2)CC1)c1ccc(F)cc1	1552256	nan	1552256
D01102	Esonarimod (JAN/INN)	CC(=O)SCC(CC(=O)c1ccc(C)cc1)C(=O)O	5439717	nan	5439717
D01107	Milnacipran hydrochloride (JAN/USAN); Savella (TN); Toledomin (TN)	CCN(CC)C(=O)C1(c2ccccc2)CC1CN.Cl	14491203, 18475821, 11213530	nan	11213530, 18475821, 14491203
D01108	Magnesium sulfate (USP); Magnesium sulfate hydrate (JP17); Magnesium sulfate heptahydrate; Conclyte-Mg (TN)	O.O.O.O.O.O.O.O=S(=O)([O-])[O-].[Mg+2]	nan	C12505	C12505
D01109	Exametazime (JAN/USAN/INN)	CC(=NO)C(C)NCC(C)(C)CNC(C)C(C)=NO	17189188, 6209995, 17189187	nan	17189187, 17189188, 6209995
D01110	Melitracen hydrochloride (JAN/USAN)	CN(C)CCC=C1c2ccccc2C(C)(C)c2ccccc21.Cl	6907537	nan	6907537
D01111	Nateglinide (JP17/USP/INN); Starsis (TN)	CC(C)C1CCC(C(=O)NC(Cc2ccccc2)C(=O)O)CC1	9092931	nan	9092931
D01112	Adapalene (JAN/USP/INN); Differin (TN)	COc1ccc(-c2ccc3cc(C(=O)O)ccc3c2)cc1C12CC3CC(CC(C3)C1)C2	7393980	nan	7393980
D01116	Bucetin (JAN/INN)	CCOc1ccc(NC(=O)CC(C)O)cc1	2725755	nan	2725755
D01117	Mizolastine (JAN/INN); Mizollen (TN)	CN(c1nccc(=O)[nH]1)C1CCN(c2nc3ccccc3n2Cc2ccc(F)cc2)CC1	7259331	nan	7259331
D01118	Profenamine hydrochloride (JAN); Ethopropazine hydrochloride; Parkin (TN); Parsidol (TN)	CCN(CC)C(C)CN1c2ccccc2Sc2ccccc21.Cl	4167357	nan	4167357
D01121	Rebamipide (JP17/INN); Mucosta (TN)	O=C(NC(Cc1cc(=O)[nH]c2ccccc12)C(=O)O)c1ccc(Cl)cc1	5384689	nan	5384689
D01122	Ibuprofen piconol (JP17/USAN); Staderm (TN)	CC(C)Cc1ccc(C(C)C(=O)OCc2ccccn2)cc1	9917883	nan	9917883
D01123	Seratrodast (JAN/USAN/INN); Bronica (TN)	CC1=C(C)C(=O)C(C(CCCCCC(=O)O)c2ccccc2)=C(C)C1=O	6489593	nan	6489593
D01126	Arginine hydrochloride (USP); L-Arginine hydrochloride (JP17); R-gene (TN)	Cl.N=C(N)NCCCC(N)C(=O)O	4158960	nan	4158960
D01128	Ramatroban (JAN/INN); Baynas (TN)	O=C(O)CCn1c2c(c3ccccc31)CC(NS(=O)(=O)c1ccc(F)cc1)CC2	8019620	nan	8019620
D01132	Tazarotene (JAN/USAN/INN); Avage (TN); Fabior (TN); Tazorac (TN)	CCOC(=O)c1ccc(C#Cc2ccc3c(c2)C(C)(C)CCS3)nc1	8159145	C12531	8159145
D01133	Pimobendan (JAN/USAN/INN); Acardi (TN)	COc1ccc(-c2nc3cc(C4=NNC(=O)CC4C)ccc3[nH]2)cc1	4207330	nan	4207330
D01135	Efloxate (JAN/INN)	CCOC(=O)COc1ccc2c(=O)cc(-c3ccccc3)oc2c1	313027	nan	313027
D01136	Tranexamic acid (JP17/USP/INN); Cyklokapron (TN); Rikavarin (TN); Transamin (TN)	NCC1CCC(C(=O)O)CC1	2207451, 21643000, 11001088, 31398171	nan	21643000, 31398171, 2207451, 11001088
D01137	Gadoteridol (JAN/USP/INN); ProHance (TN)	CC(O)CN1CCN(CC(=O)[O-])CCN(CC(=O)[O-])CCN(CC(=O)[O-])CC1.[Gd+3]	12426283	nan	12426283
D01138	Benzyl benzoate (JP17/USP); Benylate (TN)	O=C(OCc1ccccc1)c1ccccc1	2049280	C12537	2049280
D01139	Ammonium chloride (JAN/USP); Conclyte-A (TN)	[Cl-].[NH4+]	14742869, 14950556	C12538	14742869, 14950556
D01140	Benzethonium chloride (JP17/USP/INN); Hyamine (TN); Microklenz (TN); Neostelin green (TN)	CC(C)(C)CC(C)(C)c1ccc(OCCOCC[N+](C)(C)Cc2ccccc2)cc1.[Cl-]	3898548	C12539	3898548
D01141	Sulfamonomethoxine (JAN/USAN/INN); Daimeton (TN)	COc1cc(NS(=O)(=O)c2ccc(N)cc2)ncn1	621128	C12540	621128
D01142	Sulfadimethoxine (JAN/USP); Abcid (TN); Agribon (TN)	COc1cc(NS(=O)(=O)c2ccc(N)cc2)nc(OC)n1	306856	nan	306856
D01143	Isothipendyl hydrochloride (JAN); Andantol (TN)	CC(CN1c2ccccc2Sc2cccnc21)N(C)C.Cl	3760669	nan	3760669
D01144	Prulifloxacin (JAN/INN); PUFX; Sword (TN)	Cc1oc(=O)oc1CN1CCN(c2cc3c(cc2F)c(=O)c(C(=O)O)c2n3C(C)S2)CC1	5894071	nan	5894071
D01145	Azelnidipine (JP17/INN); Calblock (TN)	CC1=C(C(=O)OC(C)C)C(c2cccc([N+](=O)[O-])c2)C(C(=O)OC2CN(C(c3ccccc3)c3ccccc3)C2)=C(N)N1	7420123	nan	7420123
D01146	Iguratimod (JAN/INN)	CS(=O)(=O)Nc1cc2occ(NC=O)c(=O)c2cc1Oc1ccccc1	8640145	nan	8640145
D01147	Nadifloxacin (JAN/INN); NDFX; Acuatim (TN)	CC1CCc2c(N3CCC(O)CC3)c(F)cc3c(=O)c(C(=O)O)cn1c23	4212500	nan	4212500
D01148	Tolterodine tartrate (JAN/USP); Detrol (TN); Detrusitol (TN)	Cc1ccc(O)c(C(CCN(C(C)C)C(C)C)c2ccccc2)c1.O=C(O)C(O)C(O)C(=O)O	14311261, 11632176	nan	14311261, 11632176
D01150	Methyprylon (JAN/INN); Noludar (TN)	CCC1(CC)C(=O)NCC(C)C1=O	82860	nan	82860
D01152	Oxethazaine (JP17/USAN); Oxetacaine (INN); Strocain (TN)	CN(C(=O)CN(CCO)CC(=O)N(C)C(C)(C)Cc1ccccc1)C(C)(C)Cc1ccccc1	2404063	C12552	2404063
D01153	Pazufloxacin (JAN/INN); PZFX	CC1COc2c(C3(N)CC3)c(F)cc3c(=O)c(C(=O)O)cn1c23	7148181	nan	7148181
D01154	Potassium acetate (JAN/USP); Potassium acetate (TN)	CC(=O)[O-].[K+]	27074371, 3595449, 27596288, 32779178	C12554	3595449, 27596288, 32779178, 27074371
D01155	Gemcitabine hydrochloride (JAN/USP); Gemzar (TN)	Cl.Nc1ccn(C2OC(CO)C(O)C2(F)F)c(=O)n1	14269265	nan	14269265
D01164	Aripiprazole (JAN/USP/INN); Abilify (TN)	O=C1CCc2ccc(OCCCCN3CCN(c4cccc(Cl)c4Cl)CC3)cc2N1	7951706	C12564	7951706
D01166	Mafenide acetate (JAN/USP); Sulfamylon (TN)	CC(=O)O.NCc1ccc(S(N)(=O)=O)cc1	4049145	nan	4049145
D01169	Sodium hydroxide (JP17/NF); Sodium hydroxide (TN)	[Na+].[OH-]	18778838, 11342940	C12569	18778838, 11342940
D01172	Diphenylpyraline hydrochloride (JAN); Hispril (TN); Vena (TN)	CN1CCC(OC(c2ccccc2)c2ccccc2)CC1.Cl	3740556	nan	3740556
D01175	Carpronium chloride (JAN/INN); Actinamin (TN); Furozin (TN)	COC(=O)CCC[N+](C)(C)C.[Cl-]	3728167	nan	3728167
D01176	Blonanserin (JAN/INN); AD 5423	CCN1CCN(c2cc(-c3ccc(F)cc3)c3c(n2)CCCCCC3)CC1	9957203	nan	9957203
D01177	Remifentanil hydrochloride (JAN/USAN); Ultiva (TN)	CCC(=O)N(c1ccccc1)C1(C(=O)OC)CCN(CCC(=O)OC)CC1.Cl	8660300	nan	8660300
D01179	Duloxetine hydrochloride (JAN/USP); Cymbalta (TN); Yentreve (TN)	CNCCC(Oc1cccc2ccccc12)c1cccs1.Cl	14298271, 13592284	nan	14298271, 13592284
D01181	Iobitridol (JAN/INN)	CN(CC(O)CO)C(=O)c1c(I)c(NC(=O)C(CO)CO)c(I)c(C(=O)N(C)CC(O)CO)c1I	8178996	nan	8178996
D01183	Tolfenamic acid (JAN/INN); Clotam (TN)	Cc1c(Cl)cccc1Nc1ccccc1C(=O)O	657821	nan	657821
D01186	Deferoxamine mesylate (USP); Deferoxamine mesilate (JP17); Desferal (TN)	CC(=O)N(O)CCCCCNC(=O)CCC(=O)N(O)CCCCCNC(=O)CCC(=O)N(O)CCCCCN.CS(=O)(=O)O	4122177, 28570079	nan	28570079, 4122177
D01189	Metiazinic acid (JAN/INN)	CN1c2ccccc2Sc2ccc(CC(=O)O)cc21	619561, 5118971	nan	619561, 5118971
D01190	Ethylphenacemide (JAN); Pheneturide (INN)	CCC(C(=O)NC(N)=O)c1ccccc1	2052783	C12590	2052783
D01192	Olopatadine hydrochloride (JP17/USP); Allelock (TN); Patanol (TN); Opatanol (TN)	CN(C)CCC=C1c2ccccc2COc2ccc(CC(=O)O)cc21.Cl	21254881	nan	21254881
D01194	Ferrous fumarate (JAN/USP); Feostat (TN); Ferrum (TN)	O=C([O-])C=CC(=O)[O-].[Fe+2]	11327665	nan	11327665
D01195	Prothionamide (JP17); Protionamide (INN); Trevintix (TN)	CCCc1cc(C(N)=S)ccn1	118164	nan	118164
D01198	Toborinone (JAN/USAN/INN)	COc1ccc(CNCC(O)COc2ccc3[nH]c(=O)ccc3c2)cc1OC	5455092	nan	5455092
D01199	Emtricitabine (JAN/USAN/INN); Emtriva (TN)	Nc1nc(=O)n(C2CSC(CO)O2)cc1F	11732976, 8789875, 8787822	nan	11732976, 8789875, 8787822
D01200	Phenolsulfonphthalein (JP17/NF); Phenol red; Phenolsulfonphthalein (TN)	O=S1(=O)OC(c2ccc(O)cc2)(c2ccc(O)cc2)c2ccccc21	326470	C12600	326470
D01203	Sodium bicarbonate (JP17/USP); Meylon (TN); Neut (TN)	O=C([O-])O.[Na+]	4153970, 14329241, 16940160	C12603	4153970, 14329241, 16940160
D01204	Olmesartan medoxomil (JP17/USP); Benicar (TN); Olmetec (TN)	CCCc1nc(C(C)(C)O)c(C(=O)OCc2oc(=O)oc2C)n1Cc1ccc(-c2ccccc2-c2nnn[nH]2)cc1	7506931	nan	7506931
D01205	Dexmedetomidine hydrochloride (JAN/USP); Precedex (TN)	Cc1cccc(C(C)c2c[nH]cn2)c1C.Cl	4890476, 23299338	nan	23299338, 4890476
D01206	Febuxostat (JAN/USAN/INN); Uloric (TN); Feburic (TN)	Cc1nc(-c2ccc(OCC(C)C)c(C#N)c2)sc1C(=O)O	8005333	nan	8005333
D01207	Omeprazole sodium (USAN); Losec sodium (TN)	COc1ccc2[n-]c(S(=O)Cc3ncc(C)c(OC)c3C)nc2c1.[Na+]	28807844, 14510537, 11512125	nan	11512125, 14510537, 28807844
D01213	Tolvaptan (JAN/USAN/INN); Samsca (TN)	Cc1ccccc1C(=O)Nc1ccc(C(=O)N2CCCC(O)c3cc(Cl)ccc32)c(C)c1	8362700	nan	8362700
D01216	Sulfalene (USAN); Sulfamethopyrazine (JAN); Kelfizina (TN)	COc1nccnc1NS(=O)(=O)c1ccc(N)cc1	622512	C12616	622512
D01220	Trapidil (JP17/INN); Rocornal (TN)	CCN(CC)c1cc(C)nc2ncnn12	186842	nan	186842
D01222	Citric acid monohydrate (USP); Citric acid hydrate (JP17); Citric acid (TN)	O.O=C(O)CC(O)(CC(=O)O)C(=O)O	22757077, 30493534, 4018641	C12649	4018641, 22757077, 30493534
D01223	Capecitabine (JAN/USP/INN); Xeloda (TN)	CCCCCOC(=O)Nc1nc(=O)n(C2OC(C)C(O)C2O)cc1F	12681864	nan	12681864
D01224	Phenylpropanolamine hydrochloride (JAN/USP)	CC(N)C(O)c1ccccc1.Cl	4715995, 5304383, 3656420, 4715996, 5384163	nan	3656420, 4715996, 5304383, 4715995, 5384163
D01225	Cocarboxylase (JAN/INN); Thiamine pyrophosphate; Coenzymate (TN)	Cc1ncc(C[n+]2csc(CCOP(=O)(O)OP(=O)(O)O)c2C)c(N)n1.[Cl-]	3875902	nan	3875902
D01226	Sulpiride (JP17/USAN/INN); Dogmatyl (TN)	CCN1CCCC1CNC(=O)c1cc(S(N)(=O)=O)ccc1OC	494008	nan	494008
D01227	Bosentan (USAN); Bosentan hydrate (JAN); Tracleer (TN)	COc1ccccc1Oc1c(NS(=O)(=O)c2ccc(C(C)(C)C)cc2)nc(-c2ncccn2)nc1OCCO.O	9031515	nan	9031515
D01230	Flunitrazepam (JP17/USAN/INN); Rohypnol (TN)	CN1C(=O)CN=C(c2ccccc2F)c2cc([N+](=O)[O-])ccc21	702691	nan	702691
D01234	Pantethine (JP17); Pantosin (TN)	CC(C)(CO)C(O)C(=O)NCCC(=O)NCCSSCCNC(=O)CCNC(=O)C(O)C(C)(C)CO	2068665, 5784590	C12661	2068665, 5784590
D01235	Josamycin (JP17/USAN/INN); Leucomycin A3; JM; Josamycin (TN)	COC1C(OC(C)=O)CC(=O)OC(C)CC=CC=CC(O)C(C)CC(CC=O)C1OC1OC(C)C(OC2CC(C)(O)C(OC(=O)CC(C)C)C(C)O2)C(N(C)C)C1O	1340242	nan	1340242
D01236	Conivaptan hydrochloride (JAN/USAN); Vaprisol (TN)	Cc1nc2c([nH]1)-c1ccccc1N(C(=O)c1ccc(NC(=O)c3ccccc3-c3ccccc3)cc1)CC2.Cl	8667691	nan	8667691
D01243	Prilocaine hydrochloride (USP); Propitocaine hydrochloride (JAN); Citanest (TN)	CCCNC(C)C(=O)Nc1ccccc1C.Cl	6541935	nan	6541935
D01244	Tegafur (JP17/USAN/INN); Atillon (TN)	O=c1[nH]c(=O)n(C2CCCO2)cc1F	27880450, 27880451, 525766	C12673	27880450, 525766, 27880451
D01245	Bromazepam (JP17/USAN/INN); Lectopam (TN)	O=C1CN=C(c2ccccn2)c2cc(Br)ccc2N1	618645	nan	618645
D01246	Benzylhydrochlorothiazide (JAN); Behyd (TN)	NS(=O)(=O)c1cc2c(cc1Cl)NC(Cc1ccccc1)NS2(=O)=O	6577550, 6577549, 631362	C12675	6577549, 6577550, 631362
D01247	Ethiazide (JAN/INN)	CCC1Nc2cc(Cl)c(S(N)(=O)=O)cc2S(=O)(=O)N1	3656036, 626721, 3656035	nan	626721, 3656036, 3656035
D01252	Alclofenac (JAN/USP/INN); Mervan (TN)	C=CCOc1ccc(CC(=O)O)cc1Cl	2116510	nan	2116510
D01253	Clobazam (JAN/USAN/INN); Mystan (TN); Onfi (TN)	CN1C(=O)CC(=O)N(c2ccccc2)c2cc(Cl)ccc21	758410	nan	758410
D01254	Tofisopam (JP17/INN); Emandaxin (TN)	CCC1C(C)=NN=C(c2ccc(OC)c(OC)c2)c2cc(OC)c(OC)cc21	629080	nan	629080
D01255	Benfotiamine (JAN/INN); Biotamin (TN)	CC(=C(CCOP(=O)(O)O)SC(=O)c1ccccc1)N(C=O)Cc1cnc(C)nc1N	771326	nan	771326
D01256	Cyclothiazide (JAN/USAN/INN); Anhydron (TN)	NS(=O)(=O)c1cc2c(cc1Cl)NC(C1CC3C=CC1C3)NS2(=O)=O	722843	C12685	722843
D01259	Flopropione (JP17/INN); Ephtanon (TN)	CCC(=O)c1c(O)cc(O)cc1O	2096799	nan	2096799
D01261	Fluorescein (JAN/USP); Fluorescite (TN)	O=C1OC2(c3ccc(O)cc3Oc3cc(O)ccc32)c2ccccc21	94324	nan	94324
D01263	Ritodrine hydrochloride (JP17/USP); Yutopar (TN)	CC(NCCc1ccc(O)cc1)C(O)c1ccc(O)cc1.Cl	5321399	nan	5321399
D01264	Daunorubicin hydrochloride (JP17/USP); Cerubidine (TN)	COc1cccc2c1C(=O)c1c(O)c3c(c(O)c1C2=O)CC(O)(C(C)=O)CC3OC1CC(N)C(O)C(C)O1.Cl	14400376	nan	14400376
D01267	Floctafenine (JAN/USAN/INN); Idarac (TN)	O=C(OCC(O)CO)c1ccccc1Nc1ccnc2c(C(F)(F)F)cccc12	457808	nan	457808
D01268	Cloxazolam (JP17/INN); Sepazon (TN)	O=C1CN2CCOC2(c2ccccc2Cl)c2cc(Cl)ccc2N1	569691	nan	569691
D01269	Solifenacin succinate (JAN/USAN/INN); Vesicare (TN)	O=C(O)CCC(=O)O.O=C(OC1CN2CCC1CC2)N1CCc2ccccc2C1c1ccccc1	22361917	nan	22361917
D01270	Carboquone (JAN/INN); Esquinon (TN)	COC(COC(N)=O)C1=C(N2CC2)C(=O)C(C)=C(N2CC2)C1=O	1400765	nan	1400765
D01271	Bufexamac (JAN/INN); Anderm (TN)	CCCCOc1ccc(CC(=O)NO)cc1	2646848	nan	2646848
D01274	Tesaglitazar (JAN/USAN/INN)	CCOC(Cc1ccc(OCCc2ccc(OS(C)(=O)=O)cc2)cc1)C(=O)O	13747361	nan	13747361
D01277	Droxidopa (JP17/USAN/INN); Dops (TN); Northera (TN)	NC(C(=O)O)C(O)c1ccc(O)c(O)c1	2852792	nan	2852792
D01278	Oxazolam (JP17/INN); Serenal (TN)	CC1CN2CC(=O)Nc3ccc(Cl)cc3C2(c2ccccc2)O1	572363	nan	572363
D01280	Warfarin potassium (JP17); Athrombin-K (TN)	CC(=O)CC(c1ccccc1)c1c([O-])c2ccccc2oc1=O.[K+]	4222859	nan	4222859
D01281	Cyclofenil (JAN/INN); Sexovid (TN)	CC(=O)Oc1ccc(C(=C2CCCCC2)c2ccc(OC(C)=O)cc2)cc1	2014687	nan	2014687
D01282	Ethamsylate (USAN); Etamsylate (JAN/INN)	CCNCC.O=S(=O)(O)c1cc(O)ccc1O	4166074	nan	4166074
D01284	Bisbentiamine (JAN/INN); Beston (TN)	CC(=C(CCOC(=O)c1ccccc1)SSC(CCOC(=O)c1ccccc1)=C(C)N(C=O)Cc1cnc(C)nc1N)N(C=O)Cc1cnc(C)nc1N	741598	nan	741598
D01286	Flutazolam (JAN/INN); Coreminal (TN)	O=C1CN2CCOC2(c2ccccc2F)c2cc(Cl)ccc2N1CCO	1092501	nan	1092501
D01287	Levobupivacaine hydrochloride (JAN/USAN); Chirocaine (TN)	CCCCN1CCCCC1C(=O)Nc1c(C)cccc1C.Cl	4048737	nan	4048737
D01288	Dimefline hydrochloride (JAN/USAN); Remeflin (TN)	COc1ccc2c(=O)c(C)c(-c3ccccc3)oc2c1CN(C)C.Cl	nan	C12717	C12717
D01292	Medazepam (JP17/INN); Pamnace (TN)	CN1CCN=C(c2ccccc2)c2cc(Cl)ccc21	407983	nan	407983
D01295	Cinnarizine (JAN/USAN/INN)	C(=Cc1ccccc1)CN1CCN(C(c2ccccc2)c2ccccc2)CC1	626120	nan	626120
D01296	Methylphenidate hydrochloride (JAN/USP); Concerta (TN); Metadate (TN); Quillivant xr (TN); Ritalin (TN)	COC(=O)C(c1ccccc1)C1CCCCN1.Cl	7085276, 7085275, 5780485, 10044941, 6492989, 10045333	nan	5780485, 10045333, 7085276, 6492989, 10044941, 7085275
D01300	Clinofibrate (JP17/INN); Lipoclin (TN)	CCC(C)(Oc1ccc(C2(c3ccc(OC(C)(CC)C(=O)O)cc3)CCCCC2)cc1)C(=O)O	2230067	nan	2230067
D01302	Hydralazine hydrochloride (JP17/USP); Apresoline (TN)	Cl.NNc1nncc2ccccc12	28063825, 3568329, 18090686	nan	3568329, 28063825, 18090686
D01304	Amezinium metilsulfate (JAN); Risumic (TN)	COS(=O)(=O)[O-].COc1cc(N)cn[n+]1-c1ccccc1	5215290	nan	5215290
D01305	Feprazone (JAN/INN)	CC(C)=CCC1C(=O)N(c2ccccc2)N(c2ccccc2)C1=O	757206	nan	757206
D01306	Troxipide (JP17/INN); Aplace (TN)	COc1cc(C(=O)NC2CCCNC2)cc(OC)c1OC	493078	nan	493078
D01307	Midodrine hydrochloride (JAN/USP); Pro-Amatine (TN)	COc1ccc(OC)c(C(O)CNC(=O)CN)c1.Cl	6579688	nan	6579688
D01310	Secobarbital sodium (JAN/USP); Seconal sodium (TN)	C=CCC1(C(C)CCC)C(=O)[N-]C(=O)NC1=O.[Na+]	5369275	nan	5369275
D01312	Iodoxamic acid (JAN/USAN/INN); Endobil (TN)	O=C(CCOCCOCCOCCOCCC(=O)Nc1c(I)cc(I)c(C(=O)O)c1I)Nc1c(I)cc(I)c(C(=O)O)c1I	2801368	nan	2801368
D01315	Methylbenactyzium bromide (JP17/INN)	CC[N+](C)(CC)CCOC(=O)C(O)(c1ccccc1)c1ccccc1.[Br-]	3924493	nan	3924493
D01316	Mexazolam (JAN/INN); Melex (TN)	CC1COC2(c3ccccc3Cl)c3cc(Cl)ccc3NC(=O)CN12	1091849	nan	1091849
D01318	Diphenidol hydrochloride (USAN); Difenidol hydrochloride (JP17); Cephadol (TN); Vontrol (TN)	Cl.OC(CCCN1CCCCC1)(c1ccccc1)c1ccccc1	3760108	nan	3760108
D01321	Zotepine (JAN/INN); Setous (TN)	CN(C)CCOC1=Cc2ccccc2Sc2ccc(Cl)cc21	1435710	nan	1435710
D01324	Mequitazine (JP17/INN); Kitazemin (TN)	c1ccc2c(c1)Sc1ccccc1N2CC1CN2CCC1CC2	1150945	C12755	1150945
D01325	Tiaprofenic acid (JAN/INN); Surgam (TN)	CC(C(=O)O)c1ccc(C(=O)c2ccccc2)s1	1380662	nan	1380662
D01328	Clotiazepam (JP17/INN); Rize (TN)	CCc1cc2c(s1)N(C)C(=O)CN=C2c1ccccc1Cl	623332	nan	623332
D01330	Clidanac (JAN/INN)	O=C(O)C1CCc2cc(C3CCCCC3)c(Cl)cc21	2057663	nan	2057663
D01331	Betamipron (JP17/INN)	O=C(O)CCNC(=O)c1ccccc1	2212769	nan	2212769
D01333	Urapidil (JP17/INN); Ebrantil (TN)	COc1ccccc1N1CCN(CCCNc2cc(=O)n(C)c(=O)n2C)CC1	725782	nan	725782
D01335	Dibenzthion (JAN); Sulbentine (INN)	S=C1SCN(Cc2ccccc2)CN1Cc1ccccc1	544719	C12767	544719
D01338	Ipriflavone (JP17/INN); Osten (TN)	CC(C)Oc1ccc2c(=O)c(-c3ccccc3)coc2c1	4754346	nan	4754346
D01342	Indocyanine green (JAN/USP); IC-Green (TN)	CC1(C)C(=CC=CC=CC=CC2=[N+](CCCCS(=O)(=O)[O-])c3ccc4ccccc4c3C2(C)C)N(CCCCS(=O)(=O)[O-])c2ccc3ccccc3c21.[Na+]	4115884	nan	4115884
D01344	Fenbufen (JP17/USAN/INN)	O=C(O)CCC(=O)c1ccc(-c2ccccc2)cc1	2378560	nan	2378560
D01346	Bentiromide (JAN/USAN/INN); PFD (TN)	O=C(O)c1ccc(NC(=O)C(Cc2ccc(O)cc2)NC(=O)c2ccccc2)cc1	25093431	nan	25093431
D01347	Tramazoline hydrochloride (JAN/USAN); Towk (TN)	Cl.c1cc2c(c(NC3=NCCN3)c1)CCCC2	6247867	nan	6247867
D01351	Glafenine (JAN/INN)	O=C(OCC(O)CO)c1ccccc1Nc1ccnc2cc(Cl)ccc12	497124	nan	497124
D01354	Fludiazepam (JP17/INN); Erispan (TN)	CN1C(=O)CN=C(c2ccccc2F)c2cc(Cl)ccc21	686115	nan	686115
D01355	Tramadol hydrochloride (JP17/USP); Ultram (TN)	COc1cccc(C2(O)CCCCC2CN(C)C)c1.Cl	11060426, 9970228	nan	9970228, 11060426
D01358	Mianserin hydrochloride (JAN/USAN); Tetramide (TN)	CN1CCN2c3ccccc3Cc3ccccc3C2C1.Cl	4280594	nan	4280594
D01360	Clenbuterol hydrochloride (JAN/USP); Spiropent (TN)	CC(C)(C)NCC(O)c1cc(Cl)c(N)c(Cl)c1.Cl	5780956	nan	5780956
D01362	Tulobuterol hydrochloride (JP17); Hokunalin (TN); Respacal (TN)	CC(C)(C)NCC(O)c1ccccc1Cl.Cl	nan	C12798	C12798
D01364	Ciclopirox olamine (JAN/USP); Loprox (TN)	Cc1cc(C2CCCCC2)n(O)c(=O)c1.NCCO	6494273	nan	6494273
D01365	Trepibutone (JP17/INN); Supacal (TN)	CCOc1cc(OCC)c(C(=O)CCC(=O)O)cc1OCC	2059640	nan	2059640
D01366	Bezafibrate (JP17/USAN/INN); Bezatol SR (TN)	CC(C)(Oc1ccc(CCNC(=O)c2ccc(Cl)cc2)cc1)C(=O)O	4267656	nan	4267656
D01369	Bevantolol hydrochloride (JAN/USAN); Calvan (TN); Vantol (TN)	COc1ccc(CCNCC(O)COc2cccc(C)c2)cc1OC.Cl	5195067	nan	5195067
D01372	Zopiclone (JAN/INN); Amoban (TN); Zopiclone (TN)	CN1CCN(C(=O)OC2c3nccnc3C(=O)N2c2ccc(Cl)cn2)CC1	768704, 7726624	nan	7726624, 768704
D01376	Iodamide (JAN/USAN/INN); Jodomiron (TN)	CC(=O)NCc1c(I)c(NC(C)=O)c(I)c(C(=O)O)c1I	2175358	nan	2175358
D01377	Prifinium bromide (JAN/INN); Padrin (TN)	CC[N+]1(CC)CCC(=C(c2ccccc2)c2ccccc2)C1C.[Br-]	nan	C12814	C12814
D01380	Isopropylantipyrine (JP17); Propyphenazone (INN); Yoshipyrin (TN)	Cc1c(C(C)C)c(=O)n(-c2ccccc2)n1C	204533	nan	204533
D01381	Crotamiton (JAN/USP/INN); Eurax (TN)	CC=CC(=O)N(CC)c1ccccc1C	9759779	nan	9759779
D01382	Metharbital (JAN/INN); Gemonil (TN)	CCC1(CC)C(=O)NC(=O)N(C)C1=O	184688	nan	184688
D01383	Meperidine hydrochloride (USP); Pethidine hydrochloride (JP17); Demerol (TN)	CCOC(=O)C1(c2ccccc2)CCN(C)CC1.Cl	3744634	nan	3744634
D01384	Tolciclate (JAN/USAN/INN)	Cc1cccc(N(C)C(=S)Oc2ccc3c(c2)C2CCC3C2)c1	2774764	nan	2774764
D01385	Ibudilast (JP17/INN); Ketas (TN)	CC(C)C(=O)c1c(C(C)C)nn2ccccc12	656579	nan	656579
D01386	Ephedrine hydrochloride (JP17/USP); Ephedrine hydrochloride (TN)	CNC(C)C(O)c1ccccc1.Cl	7049238, 4788519, 8170066, 3630391, 6490347, 6490346, 7751992	nan	4788519, 6490347, 8170066, 7049238, 3630391, 7751992, 6490346
D01390	Isoproterenol hydrochloride (USP); dl-Isoprenaline hydrochloride (JAN); Isuprel (TN); Proternol-S (TN)	CC(C)NCC(O)c1ccc(O)c(O)c1.Cl	4789452, 3917363	nan	3917363, 4789452
D01391	Bromovalerylurea (JP17); Bromisoval (INN); Bromisovalum; Bromovalerylurea (TN); Bromural (TN); Brovarin (TN)	CC(C)C(Br)C(=O)NC(N)=O	1724352	C12829	1724352
D01393	Piperazine phosphate (USP); Piperazine phosphate hydrate (JP17); Pincets (TN)	C1CNCCN1.O.O=P(O)(O)O	16819015	C12839	16819015
D01394	Epirizole (JP17/USAN); Mebron (TN)	COc1cc(C)nc(-n2nc(C)cc2OC)n1	751084	nan	751084
D01395	Actarit (JAN/INN); Orcl (TN)	CC(=O)Nc1ccc(CC(=O)O)cc1	1640927	nan	1640927
D01396	Pyridinol carbamate (JAN); Pyricarbate; Anginin (TN); Angioxine (TN)	CNC(=O)OCc1cccc(COC(=O)NC)n1	1544252	C12842	1544252
D01397	Ampiroxicam (JP17/INN); Flucam (TN)	CCOC(=O)OC(C)OC1=C(C(=O)Nc2ccccn2)N(C)S(=O)(=O)c2ccccc21	5184713	nan	5184713
D01399	Fentanyl citrate (JP17/USP); Abstral (TN); Fentora (TN); Lazanda (TN); Oralet (TN)	CCC(=O)N(c1ccccc1)C1CCN(CCc2ccccc2)CC1.O=C(O)CC(O)(CC(=O)O)C(=O)O	4121500	nan	4121500
D01400	Methyl parahydroxybenzoate (JP17); Methylparaben (NF); Methyl parahydroxybenzoate (TN); Methylparaben (TN)	COC(=O)c1ccc(O)cc1	10253241, 509801	nan	10253241, 509801
D01403	Phenolsulfonic acid (JAN); p-Phenolsulfonic acid	O=S(=O)(O)c1ccc(O)cc1	1869034	C12849	1869034
D01404	Sobuzoxane (JAN); Perazolin (TN)	CC(C)COC(=O)OCN1C(=O)CN(CCN2CC(=O)N(COC(=O)OCC(C)C)C(=O)C2)CC1=O	6031322	nan	6031322
D01405	Norfenefrine hydrochloride (JAN); Zondel (TN)	Cl.NCC(O)c1cccc(O)c1	6074416, 31562961, 3702105	nan	31562961, 3702105, 6074416
D01407	Thiamphenicol (JAN/USAN/INN); Armai (TN); Thiocymetin (TN)	CS(=O)(=O)c1ccc(C(O)C(CO)NC(=O)C(Cl)Cl)cc1	2819541	nan	2819541
D01408	Flurazepam hydrochloride (JP17); Flurazepam monohydrochloride; Dalmate (TN)	CCN(CC)CCN1C(=O)CN=C(c2ccccc2F)c2cc(Cl)ccc21.Cl	4898212	nan	4898212
D01410	Benzydamine hydrochloride (JAN/USAN); Tantum (TN)	CN(C)CCCOc1nn(Cc2ccccc2)c2ccccc12.Cl	4282836	nan	4282836
D01418	Tamibarotene (JAN/INN); Am 80; Amnoid (TN)	CC1(C)CCC(C)(C)c2cc(NC(=O)c3ccc(C(=O)O)cc3)ccc21	3564473	C12864	3564473
D01419	Benzyl nicotinate (JAN); Nicotinic acid benzyl ester	O=C(OCc1ccccc1)c1cccnc1	159169	C12865	159169
D01420	Butyl parahydroxybenzoate (JP17); Butylparaben (NF); Butyl parahydroxybenzoate (TN); Butylparaben (TN)	CCCCOC(=O)c1ccc(O)cc1	1103741	nan	1103741
D01421	Aminohippurate sodium (USP); Sodium p-aminophippurate (JAN); p-Aminohippurate sodium; Paraaminohippurate (TN)	Nc1ccc(C(=O)NCC(=O)[O-])cc1.[Na+]	10732978	nan	10732978
D01422	Propyl parahydroxybenzoate (JP17); Propylparaben (NF); Propyl parahydroxybenzoate (TN)	CCCOC(=O)c1ccc(O)cc1	1103245	nan	1103245
D01423	Suplatast tosilate (JAN/INN); Suplatast tosylate; IPD (TN)	CCOCC(O)COc1ccc(NC(=O)CC[S+](C)C)cc1.Cc1ccc(S(=O)(=O)[O-])cc1	26513865, 26513867, 26513870, 26513869, 26513871, 7510580	nan	26513871, 7510580, 26513869, 26513867, 26513870, 26513865
D01426	Tinidazole (JP17/USP/INN); Haisigyn (TN); Tindamax (TN)	CCS(=O)(=O)CCn1c([N+](=O)[O-])cnc1C	618182	nan	618182
D01428	Fenoterol hydrobromide (JAN); Berotec (TN)	Br.CC(Cc1ccc(O)cc1)NCC(O)c1cc(O)cc(O)c1	4168199	nan	4168199
D01429	Fosfluconazole (JAN/INN); Prodif (TN)	O=P(O)(O)OC(Cn1cncn1)(Cn1cncn1)c1ccc(F)cc1F	9797304	nan	9797304
D01430	Tiopronin (JAN/INN); Thiola (TN)	CC(S)C(=O)NCC(=O)O	1859822	C12876	1859822
D01431	Piromidic acid (JAN/INN); PA; Panacid (TN)	CCn1cc(C(=O)O)c(=O)c2cnc(N3CCCC3)nc21	625004	nan	625004
D01437	Nifenazone (JAN/INN)	Cc1c(NC(=O)c2cccnc2)c(=O)n(-c2ccccc2)n1C	307504	nan	307504
D01438	Perlapine (JAN/USAN/INN); Hypnodin (TN)	CN1CCN(C2=Nc3ccccc3Cc3ccccc32)CC1	434631	nan	434631
D01440	Etafenone hydrochloride (JAN)	CCN(CC)CCOc1ccccc1C(=O)CCc1ccccc1.Cl	nan	C12886	C12886
D01441	Imatinib mesylate (USAN); Imatinib mesilate (JAN); Gleevec (TN); Glivec (TN)	CS(=O)(=O)O.Cc1ccc(NC(=O)c2ccc(CN3CCN(C)CC3)cc2)cc1Nc1nccc(-c2cccnc2)n1	10229624, 20890658, 14464268	nan	10229624, 20890658, 14464268
D01443	Decanohydroxamic acid (JAN)	CCCCCCCCCC(=O)NO	1705337	C12889	1705337
D01444	Bunitrolol hydrochloride (JAN); Betrilol (TN)	CC(C)(C)NCC(O)COc1ccccc1C#N.Cl	5169466	nan	5169466
D01459	Mesna (JAN/USP/INN); Mesnex (TN); Uromitexan (TN)	O=S(=O)([O-])CCS.[Na+]	3657828	nan	3657828
D01466	Ethenzamide (JP17/INN); Ethenzamide (TN)	CCOc1ccccc1C(N)=O	2208582	nan	2208582
D01467	Roxatidine acetate hydrochloride (JP17/USAN); Altat (TN)	CC(=O)OCC(=O)NCCCOc1cccc(CN2CCCCC2)c1.Cl	5915111	nan	5915111
D01468	Nemonapride (JAN/INN); Emilace (TN)	CNc1cc(OC)c(C(=O)NC2CCN(Cc3ccccc3)C2C)cc1Cl	8349928	nan	8349928
D01470	Phenylpropanol (JAN)	CCC(O)c1ccccc1	1906759, 6368067, 6911842	nan	6911842, 6368067, 1906759
D01471	Esatenolol (JAN/INN); (S)-Atenolol	CC(C)NCC(O)COc1ccc(CC(N)=O)cc1	2739235	nan	2739235
D01474	Iodixanol (JAN/USP/INN); Visipaque (TN)	CC(=O)N(CC(O)CN(C(C)=O)c1c(I)c(C(=O)NCC(O)CO)c(I)c(C(=O)NCC(O)CO)c1I)c1c(I)c(C(=O)NCC(O)CO)c(I)c(C(=O)NCC(O)CO)c1I	7245697	nan	7245697
D01478	Ebastine (JP17/USAN/INN); Kestine (TN)	CC(C)(C)c1ccc(C(=O)CCCN2CCC(OC(c3ccccc3)c3ccccc3)CC2)cc1	7522103	nan	7522103
D01480	Isoconazole nitrate (JAN); Adestan-G (TN)	Clc1ccc(C(Cn2ccnc2)OCc2c(Cl)cccc2Cl)c(Cl)c1.O=[N+]([O-])O	6467649	nan	6467649
D01485	Propericiazine (JAN); Periciazine; Neuleptil (TN)	N#Cc1ccc2c(c1)N(CCCN1CCC(O)CC1)c1ccccc1S2	576739	nan	576739
D01488	Calcium glycerophosphate (JAN); Calcium beta-glycerophosphate; Calcium glycerophosphate (TN)	O=P([O-])([O-])OC(CO)CO.[Ca+2]	nan	C12935	C12935
D01493	Nitrogen mustard N-oxide hydrochloride (JAN)	C[N+]([O-])(CCCl)CCCl.Cl	3912946	nan	3912946
D01498	Butoctamide semisuccinate (JAN); Butoctamide hydrogen succinate; Listomin S (TN)	CCCCC(CC)CNC(=O)CC(C)OC(=O)CCC(=O)O	nan	C12946	C12946
D01507	Tolperisone hydrochloride (JP17); Muscalm (TN)	Cc1ccc(C(=O)C(C)CN2CCCCC2)cc1.Cl	7054592	nan	7054592
D01508	Phenylacetylglycine dimethylamide (JAN)	CC(=O)N(CC(=O)N(C)C)c1ccccc1	nan	C12958	C12958
D01511	d.d-T-Cyphenothrin (JAN)	CC(C)=CC1C(C(=O)OC(C#N)c2cccc(Oc3ccccc3)c2)C1(C)C	nan	C12962	C12962
D01514	Etizolam (JP17/INN); Sedekopan (TN)	CCc1cc2c(s1)-n1c(C)nnc1CN=C2c1ccccc1Cl	572740	nan	572740
D01526	Sulfisomidine (JAN); Sulfaisodimidine; Sulfisomidine (TN)	Cc1cc(NS(=O)(=O)c2ccc(N)cc2)nc(C)n1	261305	nan	261305
D01527	Epidihydrocholesterin (JAN); Dihydrin (TN)	CC(C)CCCC(C)C1CCC2C3CCC4CC(O)CCC4(C)C3CCC12C	17659712, 1914455	nan	17659712, 1914455
D01530	Tocopherol nicotinate (JP17); dl-alpha-Tocopherol nicotinate; Juvela nicotinate (TN)	Cc1c(C)c2c(c(C)c1OC(=O)c1cccnc1)CCC(C)(CCCC(C)CCCC(C)CCCC(C)C)O2	466142	nan	466142
D01537	Xaliproden hydrochloride (JAN); SR 57746A	Cl.FC(F)(F)c1cccc(C2=CCN(CCc3ccc4ccccc4c3)CC2)c1	11342994	nan	11342994
D01545	Aceclofenac (JAN/INN); Aceclofenac (TN)	O=C(O)COC(=O)Cc1ccccc1Nc1c(Cl)cccc1Cl	4884476	nan	4884476
D01546	Dothiepin hydrochloride (USAN); Dosulepin hydrochloride (JAN); Dosulepin (TN)	CN(C)CCC=C1c2ccccc2CSc2ccccc21.Cl	4339832	nan	4339832
D01547	Zaltoprofen (JP17/INN); CN 100; Peon (TN)	CC(C(=O)O)c1ccc2c(c1)CC(=O)c1ccccc1S2	6770548	nan	6770548
D01550	Liranaftate (JAN/INN); Zefnart (TN)	COc1cccc(N(C)C(=S)Oc2ccc3c(c2)CCCC3)n1	12615149	nan	12615149
D01552	Edaravone (USAN/JP17/INN); Radicava (TN); Radicut (TN)	CC1=NN(c2ccccc2)C(=O)C1	609575	C13008	609575
D01555	Ioversol (JAN/USP/INN); Optiray (TN)	O=C(NCC(O)CO)c1c(I)c(C(=O)NCC(O)CO)c(I)c(N(CCO)C(=O)CO)c1I	8178799	nan	8178799
D01557	Glycol salicylate (JAN); Ethylene glycol salicylate; Norgesic (TN); Phlogont (TN)	O=C(OCCO)c1ccccc1O	2255685	nan	2255685
D01558	1-Naphthylacetic acid (JAN); alpha-Naphthylacetic acid	O=C(O)Cc1cccc2ccccc12	3611461, 1308415	C13014	1308415, 3611461
D01559	Ethyl L-cysteine hydrochloride (JP17); L-Cysteine, ethyl ester, hydrochloride; Daiace (TN)	CCOC(=O)C(N)CS.Cl	14257228, 4327606, 5297388	nan	5297388, 14257228, 4327606
D01561	Potassium bitartrate (USP); Potassium hydrogen tartrate (JAN)	O=C([O-])C(O)C(O)C(=O)O.[K+]	4829688, 16718989	nan	4829688, 16718989
D01562	Aranidipine (JAN/INN); Sapresta (TN)	COC(=O)C1=C(C)NC(C)=C(C(=O)OCC(C)=O)C1c1ccccc1[N+](=O)[O-]	5642628	nan	5642628
D01567	Ketophenylbutazone (JAN); Kebuzone (INN)	CC(=O)CCC1C(=O)N(c2ccccc2)N(c2ccccc2)C1=O	308507	nan	308507
D01570	Iofetamine hydrochloride I 123 (USAN); N-Isopropyl-p-iodoamphetamine (123I) hydrochloride (JAN); Spectamine (TN)	CC(C)NC(C)Cc1ccc(I)cc1.Cl	14170585	nan	14170585
D01572	Pralidoxime iodide (JAN/USAN); Pam (TN)	C[n+]1ccccc1C=NO.[I-]	4163555	nan	4163555
D01573	Etilefrine hydrochloride (JP17); Etilefrine hydrochloride (TN)	CCNCC(O)c1cccc(O)c1.Cl	5775456	nan	5775456
D01574	Methyl L-cysteine hydrochloride (JAN); Mecysteine hydrochloride; L-Methylcysteine hydrochloride; Visclair (TN)	COC(=O)C(N)CS.Cl	5293361, 4325331	nan	4325331, 5293361
D01576	Oxeladin citrate (JAN)	CCN(CC)CCOCCOC(=O)C(CC)(CC)c1ccccc1.O=C(O)CC(O)(CC(=O)O)C(=O)O	3870954	nan	3870954
D01577	Bronopol (JAN/INN)	O=[N+]([O-])C(Br)(CO)CO	1705868	C13034	1705868
D01578	Pranoprofen (JP17/INN); Elicapric (TN)	CC(C(=O)O)c1ccc2c(c1)Cc1cccnc1O2	889798	nan	889798
D01579	Osalmid (JAN/INN)	O=C(Nc1ccc(O)cc1)c1ccccc1O	2941480	nan	2941480
D01580	Lynestrenol (JAN/USAN)	C#CC1(O)CCC2C3CCC4=CCCCC4C3CCC21C	2289191	nan	2289191
D01581	Flufenamic acid (JAN/USAN/INN); Arlef (TN)	O=C(O)c1ccccc1Nc1cccc(C(F)(F)F)c1	1996069	C13038	1996069
D01582	Acemetacin (JP17/INN); Rantudil (TN)	COc1ccc2c(c1)c(CC(=O)OCC(=O)O)c(C)n2C(=O)c1ccc(Cl)cc1	501672	nan	501672
D01583	Pirfenidone (JAN/USAN/INN); Esbriet (TN)	Cc1ccc(=O)n(-c2ccccc2)c1	1526549	nan	1526549
D01584	Anetholtrithion (JAN); Athenentol (TN)	COc1ccc(-c2cc(=S)ss2)cc1	158393	nan	158393
D01585	Exalamide (JAN/INN)	CCCCCCOc1ccccc1C(N)=O	2645003	nan	2645003
D01587	Tricaprilin (JAN/USAN)	CCCCCCCC(=O)OCC(COC(=O)CCCCCCC)OC(=O)CCCCCCC	1717202	C13044	1717202
D01588	Domiphen bromide (JAN/USAN/INN); Oradol (TN)	CCCCCCCCCCCC[N+](C)(C)CCOc1ccccc1.[Br-]	3922742	nan	3922742
D01590	Ethyl linoleate (JAN)	CCCCCC=CCC=CCCCCCCCC(=O)OCC	1727826	nan	1727826
D01591	Ethyl 4-nitrophenyl ethylphosphonate (JAN); p-Nitrophenyl-o-ethyl ethylphosphonate	CCOP(=O)(CC)Oc1ccc([N+](=O)[O-])cc1	1990082	C13048	1990082
D01593	Nimetazepam (JAN/INN); Erimin (TN)	CN1C(=O)CN=C(c2ccccc2)c2cc([N+](=O)[O-])ccc21	759813	nan	759813
D01594	Bendazac (JAN/USAN/INN); Iwazac (TN)	O=C(O)COc1nn(Cc2ccccc2)c2ccccc12	893958	nan	893958
D01597	Clothiapine (USAN); Clotiapine (JAN/INN); Entumin (TN)	CN1CCN(C2=Nc3ccccc3Sc3ccc(Cl)cc32)CC1	568276	nan	568276
D01599	Gliclazide (JP17/INN); Glimicron (TN)	Cc1ccc(S(=O)(=O)NC(=O)NN2CC3CCCC3C2)cc1	1657836	nan	1657836
D01600	Diphenylpiperidinomethyldioxolan iodide (JAN); Anacolin; Gastrophyllin-A (TN)	C[N+]1(CC2COC(c3ccccc3)(c3ccccc3)O2)CCCCC1.[I-]	3821468	nan	3821468
D01601	Acetylsulfamethoxazole (JAN)	CC(=O)Nc1ccc(S(=O)(=O)Nc2cc(C)on2)cc1	285801	C13061	285801
D01605	Meticrane (JP17/INN); Arresten (TN)	Cc1cc2c(cc1S(N)(=O)=O)S(=O)(=O)CCC2	14623802	nan	14623802
D01613	Azasetron hydrochloride (JAN); Serotone (TN)	CN1C(=O)COc2c(C(=O)NC3CN4CCC3CC4)cc(Cl)cc21.Cl	5468610	nan	5468610
D01621	Retinol acetate (JP17)	CC(=O)OCC=C(C)C=CC=C(C)C=CC1=C(C)CCCC1(C)C	1915438	nan	1915438
D01622	Riboflavin sodium phosphate (JP17); Infuvite (TN)	Cc1cc2nc3c(=O)[nH]c(=O)nc-3n(CC(O)C(O)C(O)COP(=O)([O-])O)c2cc1C.[Na+]	3645532	nan	3645532
D01624	Sarpogrelate hydrochloride (JP17); Anplag (TN)	COc1cccc(CCc2ccccc2OCC(CN(C)C)OC(=O)CCC(=O)O)c1.Cl	3643699	nan	3643699
D01630	Propentofylline (JAN/INN)	CCCn1cnc2c1c(=O)n(CCCCC(C)=O)c(=O)n2C	1156290	nan	1156290
D01634	Piretanide (JAN/USAN/INN); Arelix (TN)	NS(=O)(=O)c1cc(C(=O)O)cc(N2CCCC2)c1Oc1ccccc1	5633965	nan	5633965
D01635	Methoxyphenamine hydrochloride (JAN); Phenamine (TN)	CNC(C)Cc1ccccc1OC.Cl	6118547	nan	6118547
D01638	Afloqualone (JP17/INN); Airomate (TN)	Cc1ccccc1-n1c(CF)nc2ccc(N)cc2c1=O	819769	nan	819769
D01641	Hexestrol (JAN/INN)	CCC(c1ccc(O)cc1)C(CC)c1ccc(O)cc1	2056686	C13101	2056686
D01642	Bismuth subnitrate (JP17/USP); Mammol (TN)	O=[N+]([O-])O[Bi](O[N+](=O)[O-])O[NH+]([O-])O	nan	C13102	C13102
D01646	Gadoversetamide (JAN/USP/INN); Optimark (TN)	COCCNC(=O)CN(CCN(CCN(CC(=O)[O-])CC(=O)NCCOC)CC(=O)[O-])CC(=O)[O-].[Gd+3]	11736544	nan	11736544
D01647	Ethyl parahydroxybenzoate (JP17); Ethylparaben (NF); Ethyl parahydroxybenzoate (TN)	CCOC(=O)c1ccc(O)cc1	1101972	nan	1101972
D01652	Apafant (JAN/USAN/INN)	Cc1nnc2n1-c1sc(CCC(=O)N3CCOCC3)cc1C(c1ccccc1Cl)=NC2	4302553	nan	4302553
D01653	Benserazide hydrochloride (JP17)	Cl.NC(CO)C(=O)NNCc1ccc(O)c(O)c1O	6494463	nan	6494463
D01654	Bepotastine besylate (USAN); Bepotastine besilate (JP17); Bepreve (TN); Talion (TN)	O=C(O)CCCN1CCC(OC(c2ccc(Cl)cc2)c2ccccn2)CC1.O=S(=O)(O)c1ccccc1	23932060	nan	23932060
D01655	Adefovir dipivoxil (USAN); Adefovir pivoxil (JAN); Hepsera (TN)	CC(C)(C)C(=O)OCOP(=O)(COCCn1cnc2c(N)ncnc21)OCOC(=O)C(C)(C)C	7060608	nan	7060608
D01657	Lormetazepam (JAN/USAN/INN); Loramet (TN)	CN1C(=O)C(O)N=C(c2ccccc2Cl)c2cc(Cl)ccc21	759821	nan	759821
D01664	Omoconazole nitrate (JAN/USAN)	CC(=C(OCCOc1ccc(Cl)cc1)c1ccc(Cl)cc1Cl)n1ccnc1.O=[N+]([O-])O	6472782	nan	6472782
D01666	Bropirimine (JAN/USAN/INN)	Nc1nc(=O)c(Br)c(-c2ccccc2)[nH]1	nan	C13127	C13127
D01669	Tazanolast (JAN/INN); Tazanol (TN)	CCCCOC(=O)C(=O)Nc1cccc(-c2nnn[nH]2)c1	6894732	nan	6894732
D01671	Eperisone hydrochloride (JP17); Epenard (TN)	CCc1ccc(C(=O)C(C)CN2CCCCC2)cc1.Cl	7055308	nan	7055308
D01672	Gabexate mesilate (JP17); Gabexate mesylate; Arodate (TN)	CCOC(=O)c1ccc(OC(=O)CCCCCNC(=N)N)cc1.CS(=O)(=O)O	5702026	nan	5702026
D01674	Naftopidil (JP17/INN); Flivas (TN)	COc1ccccc1N1CCN(CC(O)COc2cccc3ccccc23)CC1	629965	nan	629965
D01675	Felbinac (JP17/USAN/INN); Dolinac (TN); Felbinac (TN)	O=C(O)Cc1ccc(-c2ccccc2)cc1	1211592	nan	1211592
D01676	Acetomenaphtone (JAN)	CC(=O)Oc1cc(C)c(OC(C)=O)c2ccccc12	1991457	nan	1991457
D01677	beta-Butoxyethyl nicotinate (JAN); Nicoboxil (INN)	CCCCOCCOC(=O)c1cccnc1	165033	C13138	165033
D01689	Loteprednol etabonate (JAN/USAN); Lotemax (TN)	CCOC(=O)OC1(C(=O)OCCl)CCC2C3CCC4=CC(=O)C=CC4(C)C3C(O)CC21C	15032827	nan	15032827
D01690	Vesnarinone (JAN/USAN/INN); Arkin Z (TN)	COc1ccc(C(=O)N2CCN(c3ccc4c(c3)CCC(=O)N4)CC2)cc1OC	5644229	nan	5644229
D01691	Nipradilol (JAN/INN); Hypadil (TN)	CC(C)NCC(O)COc1cccc2c1OCC(O[N+](=O)[O-])C2	3566879	nan	3566879
D01692	Alfuzosin hydrochloride (JAN/USAN); Uroxatral (TN)	COc1cc2nc(N(C)CCCNC(=O)C3CCCO3)nc(N)c2cc1OC.Cl	20417946, 6034829	nan	6034829, 20417946
D01694	Pantothenyl ethylether (JAN); Pantothenyl ethyl ether	CCOCCCNC(=O)C(O)C(C)(C)CO	1952274	nan	1952274
D01698	Dalcotidine (JAN/INN); KU 1257	CCNC(=O)NCCCOc1cccc(CN2CCCCC2)c1	5349956	nan	5349956
D01699	Darifenacin hydrobromide (JAN/USAN); Enablex (TN)	Br.NC(=O)C(c1ccccc1)(c1ccccc1)C1CCN(CCc2ccc3c(c2)CCO3)C1	9029066	nan	9029066
D01704	Cilomilast (JAN/USAN/INN); Ariflo (TN)	COc1ccc(C2(C#N)CCC(C(=O)O)CC2)cc1OC1CCCC1	9964928, 12094599, 8011208	nan	12094599, 9964928, 8011208
D01705	Clemizole hydrochloride (JAN); Allercur (TN); Reactrol (TN)	Cl.Clc1ccc(Cn2c(CN3CCCC3)nc3ccccc32)cc1	3791565, 24066585	nan	24066585, 3791565
D01711	Sodium hypochlorite (JAN/USP); Texant (TN)	[Na+].[O-]Cl	11342986	nan	11342986
D01713	Epinastine hydrochloride (JAN); Alesion (TN); Elestat (TN)	Cl.NC1=NCC2c3ccccc3Cc3ccccc3N12	30954960, 3576207	nan	3576207, 30954960
D01714	Iotrolan (JAN/USAN/INN); Isovist 300 (TN)	CN(C(=O)CC(=O)N(C)c1c(I)c(C(=O)NC(CO)C(O)CO)c(I)c(C(=O)NC(CO)C(O)CO)c1I)c1c(I)c(C(=O)NC(CO)C(O)CO)c(I)c(C(=O)NC(CO)C(O)CO)c1I	9894685	nan	9894685
D01715	Risarestat (INN); CT 112	CCCCCOc1ccc(C2SC(=O)NC2=O)cc1OCC	5583551	nan	5583551
D01716	Fleroxacin (JAN/USAN/INN); FLRX; Megalocin (TN); Megalone (TN)	CN1CCN(c2c(F)cc3c(=O)c(C(=O)O)cn(CCF)c3c2F)CC1	4300996	C13179	4300996
D01718	Mofezolac (JAN/INN); Mofezolac (TN)	COc1ccc(-c2noc(CC(=O)O)c2-c2ccc(OC)cc2)cc1	5986171	nan	5986171
D01719	Iomeprol (JAN/USAN/INN); Iomeron 300 (TN)	CN(C(=O)CO)c1c(I)c(C(=O)NCC(O)CO)c(I)c(C(=O)NCC(O)CO)c1I	8177227	nan	8177227
D01720	Amorolfine hydrochloride (JAN); Pekiron (TN)	CCC(C)(C)c1ccc(CC(C)CN2CC(C)OC(C)C2)cc1.Cl	11337161	nan	11337161
D01721	Pentaerythritol tetranitrate (JAN); Pentaerithrityl tetranitrate (INN); Pentritol tempules (TN)	O=[N+]([O-])OCC(CO[N+](=O)[O-])(CO[N+](=O)[O-])CO[N+](=O)[O-]	1716886	nan	1716886
D01726	Potassium sulfate (JP17/USAN)	O=S(=O)([O-])[O-].[K+].[K+]	nan	C13192	C13192
D01729	3-Iodobenzylguanidine (123I) (JAN); m-Iodobenzylguanidine-123I; MyoMIBG-I 123 (TN)	N=C(N)NCc1cccc(I)c1	4988775	nan	4988775
D01730	Silver nitrate (JP17/USP); Silver nitrate (TN)	O=[N+]([O-])[O-].[Ag+]	16502110, 16502131, 4933628, 16600255, 27469975	nan	16502131, 16502110, 27469975, 4933628, 16600255
D01731	Potassium bromide (JP17/USP); Potassium bromide (TN)	[Br-].[K+]	nan	C13198	C13198
D01732	Anhydous sodium sulfate (JP17); Sodium sulfate, dried (JAN); Sodium sulfate, dried (TN)	O=S(=O)([O-])[O-].[Na+].[Na+]	nan	C13199	C13199
D01735	Tocopherol acetate (JP17); Vectan (TN)	CC(=O)Oc1c(C)c(C)c2c(c1C)CCC(C)(CCCC(C)CCCC(C)CCCC(C)C)O2	455066	nan	455066
D01738	Perflutren (JAN/USAN/INN); Definity (TN)	FC(F)(F)C(F)(F)C(F)(F)F	1704032	nan	1704032
D01740	Barbital (JP17/INN); Barbital (TN)	CCC1(CC)C(=O)NC(=O)NC1=O	163999	nan	163999
D01741	Celiprolol hydrochloride (JAN/USAN); Selectol (TN)	CCN(CC)C(=O)Nc1ccc(OCC(O)CNC(C)(C)C)c(C(C)=O)c1.Cl	5387269	nan	5387269
D01744	Brotizolam (JP17/USAN/INN); Lendormin (TN)	Cc1nnc2n1-c1sc(Br)cc1C(c1ccccc1Cl)=NC2	839277	nan	839277
D01745	Domperidone (JP17/USAN/INN); Motilium (TN)	O=c1[nH]c2ccccc2n1CCCN1CCC(n2c(=O)[nH]c3cc(Cl)ccc32)CC1	903774	nan	903774
D01748	Isoxsuprine hydrochloride (JP17/USP); Duvadilan (TN)	CC(COc1ccccc1)NC(C)C(O)c1ccc(O)cc1.Cl	4046235	nan	4046235
D01750	Idebenone (JAN/USAN/INN); Raxone (TN)	COC1=C(OC)C(=O)C(CCCCCCCCCCO)=C(C)C1=O	2001459	nan	2001459
D01751	Fenipentol (JAN/INN)	CCCCC(O)c1ccccc1	1908761, 7122774	nan	7122774, 1908761
D01754	Niceritrol (JP17/INN); Perycit (TN)	O=C(OCC(COC(=O)c1cccnc1)(COC(=O)c1cccnc1)COC(=O)c1cccnc1)c1cccnc1	377170	nan	377170
D01757	Bismuth subcarbonate (JAN/USP); Bismuth subcarbonate (TN)	O=[Bi]OC(=O)O[Bi]=O	14669785	nan	14669785
D01758	Haloxazolam (JP17/INN); Somelin (TN)	O=C1CN2CCOC2(c2ccccc2F)c2cc(Br)ccc2N1	5767396	nan	5767396
D01762	Dipyrone (USAN); Sulpyrine hydrate (JP17); Metamizole sodium salt monohydrate; Sulpyrine (TN)	Cc1c(N(C)CS(=O)(=O)[O-])c(=O)n(-c2ccccc2)n1C.O.[Na+]	3865381	C13229	3865381
D01766	Camostat mesilate (JP17); Camostat mesylate; Camostat monomethanesulfonate; Foipan (TN)	CN(C)C(=O)COC(=O)Cc1ccc(OC(=O)c2ccc(NC(=N)N)cc2)cc1.CS(=O)(=O)O	6044073	nan	6044073
D01767	Tenoxicam (JAN/USAN/INN); Tilcotil (TN)	CN1C(C(=O)Nc2ccccn2)=C(O)c2sccc2S1(=O)=O	572193	nan	572193
D01768	Benoxinate hydrochloride (USP); Oxybuprocaine hydrochloride (JP17); Benoxil (TN)	CCCCOc1cc(C(=O)OCCN(CC)CC)ccc1N.Cl	3748200	nan	3748200
D01771	Proxyphylline (JAN/INN); Monophyllin (TN)	CC(O)Cn1cnc2c1c(=O)n(C)c(=O)n2C	262773	nan	262773
D01773	Oxatomide (JAN/USAN/INN); Celtect (TN)	O=c1[nH]c2ccccc2n1CCCN1CCN(C(c2ccccc2)c2ccccc2)CC1	4724760	nan	4724760
D01774	Iodipamide (USP); Adipiodone (JAN/INN)	O=C(CCCCC(=O)Nc1c(I)cc(I)c(C(=O)O)c1I)Nc1c(I)cc(I)c(C(=O)O)c1I	2230896	nan	2230896
D01775	Bifonazole (JP17/USAN/INN); Mycospor (TN)	c1ccc(-c2ccc(C(c3ccccc3)n3ccnc3)cc2)cc1	618427	nan	618427
D01776	Antipyrine (JP17/USP); Phenazone (INN)	Cc1cc(=O)n(-c2ccccc2)n1C	5958330, 157775	C13244	5958330, 157775
D01778	Bromhexine hydrochloride (JP17/USAN); Bisolvon (TN)	CN(Cc1cc(Br)cc(Br)c1N)C1CCCCC1.Cl	4848376	nan	4848376
D01781	Sodium citrate hydrate (JP17); Trisodium citrate dihydrate; Sodium citrate (TN); Tricitrasol (TN)	O.O.O=C([O-])CC(O)(CC(=O)[O-])C(=O)[O-].[Na+].[Na+].[Na+]	nan	C13249	C13249
D01783	Rolipram (JAN/USAN/INN)	COc1ccc(C2CNC(=O)C2)cc1OC1CCCC1	1588548	nan	1588548
D01784	Carmofur (JP17/INN); Mifurol (TN)	CCCCCCNC(=O)n1cc(F)c(=O)[nH]c1=O	888898	C13252	888898
D01786	Mebhydrolin napadisilate (JAN)	CN1CCc2c(c3ccccc3n2Cc2ccccc2)C1.CN1CCc2c(c3ccccc3n2Cc2ccccc2)C1.O=S(=O)(O)c1cccc2c(S(=O)(=O)O)cccc12	nan	C13254	C13254
D01788	Amfenac sodium (USAN); Amfenac sodium hydrate (JAN); Fenazox (TN)	Nc1c(CC(=O)[O-])cccc1C(=O)c1ccccc1.O.[Na+]	13961743, 13313120	nan	13313120, 13961743
D01792	1,3,5-Trimethoxybenzene (JAN)	COc1cc(OC)cc(OC)c1	6648919, 1307993	nan	6648919, 1307993
D01795	Tilisolol hydrochloride (JAN); Selecal (TN)	Cl.Cn1cc(OCC(O)CNC(C)(C)C)c2ccccc2c1=O	6757356	nan	6757356
D01796	Meglumine (JP17/USP/INN)	CNCC(O)C(O)C(O)C(O)CO	17717782, 2324336	nan	2324336, 17717782
D01799	Glyclopyramide (JAN/INN); Deamelin-S (TN)	O=C(NN1CCCC1)NS(=O)(=O)c1ccc(Cl)cc1	1350984	nan	1350984
D01804	Cadralazine (JP17/INN); Cadral (TN)	CCOC(=O)NNc1ccc(N(CC)CC(C)O)nn1	894631	nan	894631
D01805	Aceglatone (JAN/INN); Glucaron (TN)	CC(=O)OC1C(=O)OC2C(OC(C)=O)C(=O)OC12	90625	nan	90625
D01806	Oxprenolol hydrochloride (JP17/USP); Okuspurecol (TN)	C=CCOc1ccccc1OCC(O)CNC(C)C.Cl	4165671	nan	4165671
D01807	Mebutamate (JAN/USAN); Capla (TN); Dormate (TN)	CCC(C)C(C)(COC(N)=O)COC(N)=O	1788226	nan	1788226
D01809	Bucillamine (JP17/INN); Bucilant (TN)	CC(C)(S)C(=O)NC(CS)C(=O)O	5737854	nan	5737854
D01810	Nicorandil (JP17/USAN/INN); Sigmart (TN)	O=C(NCCO[N+](=O)[O-])c1cccnc1	481451	C13280	481451
D01811	Salicylamide (JAN/USP/INN); Salicylamide (TN)	NC(=O)c1ccccc1O	742439	nan	742439
D01814	S-Hydroprene (JAN)	CCOC(=O)C=C(C)C=CCC(C)CCCC(C)C	1871156	nan	1871156
D01815	Oxapium iodide (JP17/INN); Espalexan (TN)	C[N+]1(CC2COC(c3ccccc3)(C3CCCCC3)O2)CCCCC1.[I-]	15391132	nan	15391132
D01816	Diisopropylamine dichloroacetate (JAN); Liverall (TN)	CC(C)NC(C)C.O=C(O)C(Cl)Cl	4158968	nan	4158968
D01817	Iohexol (JP17/USP/INN); Omnipaque (TN)	CC(=O)N(CC(O)CO)c1c(I)c(C(=O)NCC(O)CO)c(I)c(C(=O)NCC(O)CO)c1I	2406632	nan	2406632
D01818	Proglumide (JP17/USAN/INN); Nulsa (TN)	CCCN(CCC)C(=O)C(CCC(=O)O)NC(=O)c1ccccc1	4151696	nan	4151696
D01822	Clofenamide (JAN/INN)	NS(=O)(=O)c1ccc(Cl)c(S(N)(=O)=O)c1	2142672	nan	2142672
D01824	Phenprobamate (JAN/INN); Spantol (TN)	NC(=O)OCCCc1ccccc1	1959273	nan	1959273
D01827	Teprenone (JP17/INN); Selbex (TN)	CC(=O)CCC=C(C)CCC=C(C)CCC=C(C)CCC=C(C)C	1791530	nan	1791530
D01828	Amlexanox (JP17/USAN/INN); Aphthasol (TN); Solfa (TN)	CC(C)c1ccc2oc3nc(N)c(C(=O)O)cc3c(=O)c2c1	556384	nan	556384
D01830	Arotinolol hydrochloride (JP17); Almarl (TN)	CC(C)(C)NCC(O)CSc1nc(-c2ccc(C(N)=O)s2)cs1.Cl	10042125	nan	10042125
D01832	Modafinil (JAN/USP/INN); Provigil (TN)	NC(=O)CS(=O)C(c1ccccc1)c1ccccc1	10016759, 11334026, 10018841, 1978970	nan	10016759, 10018841, 11334026, 1978970
D01833	Benziodarone (JAN/INN); Amplivix (TN)	CCc1oc2ccccc2c1C(=O)c1cc(I)c(O)c(I)c1	1257683	nan	1257683
D01840	Fasudil hydrochloride (JAN)	Cl.O=S(=O)(c1cccc2cnccc12)N1CCCNCC1	15557632, 5466340	nan	15557632, 5466340
D01841	Felbinac ethyl (JAN); LM 001	CCOC(=O)Cc1ccc(-c2ccccc2)cc1	2052035	nan	2052035
D01842	Fidarestat (JAN/INN); SNK 860; Aldos (TN)	NC(=O)C1CC2(NC(=O)NC2=O)c2cc(F)ccc2O1	15727438	nan	15727438
D01846	Gimeracil (JAN/INN)	O=c1cc(O)c(Cl)c[nH]1	6135922	nan	6135922
D01848	Lanperisone hydrochloride (JAN); NK 433	CC(CN1CCCC1)C(=O)c1ccc(C(F)(F)F)cc1.Cl	7259667	nan	7259667
D01849	Lercanidipine hydrochloride (JAN/USAN); Cardiovasc (TN)	COC(=O)C1=C(C)NC(C)=C(C(=O)OC(C)(C)CN(C)CCC(c2ccccc2)c2ccccc2)C1c1cccc([N+](=O)[O-])c1.Cl	7406263	nan	7406263
D01851	Mepranoprofen arbamel (JAN); Y-23023	Cc1ccc2c(n1)Oc1ccc(C(C)C(=O)OCC(=O)N(C)C)cc1C2	13497504	nan	13497504
D01856	Nifekalant hydrochloride (JAN); MS 551; Shinbit (TN)	Cl.Cn1c(NCCN(CCO)CCCc2ccc([N+](=O)[O-])cc2)cc(=O)n(C)c1=O	5843932	nan	5843932
D01858	Panazepide (JAN); Pranazepide; FK 480; FR 120480	O=C(NC1N=C(c2ccccc2F)c2cccc3c2N(CC3)C1=O)c1cc2ccccc2[nH]1	7172889	nan	7172889
D01864	Carbazochrome (JAN/INN)	CN1CC(O)C2=CC(=NNC(N)=O)C(=O)C=C21	90795	nan	90795
D01865	Pelubiprofen (JAN/INN)	CC(C(=O)O)c1ccc(C=C2CCCCC2=O)cc1	2383164	nan	2383164
D01866	Lornoxicam (JAN/USAN/INN); Lorcam (TN)	CN1C(C(=O)Nc2ccccn2)=C(O)c2sc(Cl)cc2S1(=O)=O	1039965	nan	1039965
D01870	p-Hydroxypropiophenone (JAN); Paroxypropione (INN)	CCC(=O)c1ccc(O)cc1	907511	C13342	907511
D01874	Vedaprofen (JAN/USAN/INN)	CC(C(=O)O)c1ccc(C2CCCCC2)c2ccccc12	5568831	nan	5568831
D01879	Eptazocine hydrobromide (JAN); Sedapain (TN)	Br.CN1CCC2(C)CC(Cc3ccc(O)cc32)C1	13196208	nan	13196208
D01883	Aniracetam (JAN/USAN/INN)	COc1ccc(C(=O)N2CCCC2=O)cc1	4807205	C13355	4807205
D01890	Repirinast (JAN/USAN/INN); Romet (TN)	Cc1ccc2c([nH]c(=O)c3c(=O)cc(C(=O)OCCC(C)C)oc32)c1C	4267921	nan	4267921
D01892	Icosapent ethyl (USAN); Ethyl icosapentate (JP17); Epadel S (TN); Vascepa (TN)	CCC=CCC=CCC=CCC=CCC=CCCCC(=O)OCC	8919026	nan	8919026
D01893	Iopromide (JAN/USP/INN); Proscope (TN); Ultravist (TN)	COCC(=O)Nc1c(I)c(C(=O)NCC(O)CO)c(I)c(C(=O)N(C)CC(O)CO)c1I	7085608, 15586993, 15586994	nan	15586993, 7085608, 15586994
D01896	Cilostazol (JP17/USP/INN); Pletal (TN)	O=C1CCc2cc(OCCCCc3nnnn3C3CCCCC3)ccc2N1	3632107	nan	3632107
D01898	Haloperidol decanoate (JAN/USP); Halomonth (TN)	CCCCCCCCCC(=O)OC1(c2ccc(Cl)cc2)CCN(CCCC(=O)c2ccc(F)cc2)CC1	6758018	nan	6758018
D01903	Docarpamine (JAN/INN); Tanadopa (TN)	CCOC(=O)Oc1ccc(CCNC(=O)C(CCSC)NC(C)=O)cc1OC(=O)OCC	6453021	nan	6453021
D01906	Dilevalol hydrochloride (JAN/USAN)	CC(CCc1ccccc1)NCC(O)c1ccc(O)c(C(N)=O)c1.Cl	5322652	nan	5322652
D01908	Nilvadipine (JP17/USAN/INN); Nivadil (TN)	COC(=O)C1=C(C#N)NC(C)=C(C(=O)OC(C)C)C1c1cccc([N+](=O)[O-])c1	6577874, 6577873, 3572609	nan	6577874, 6577873, 3572609
D01913	Riboflavin butyrate (JP17); Riboflavin tetrabutyrate; Hibon (TN)	CCCC(=O)OCC(OC(=O)CCC)C(OC(=O)CCC)C(Cn1c2nc(=O)[nH]c(=O)c-2nc2cc(C)c(C)cc21)OC(=O)CCC	604728	nan	604728
D01914	Piracetam (JAN/USAN/INN); Myocalm (TN)	NC(=O)CN1CCCC1=O	1526393	nan	1526393
D01920	Tenatoprazole (JAN/INN); TU 199	COc1ccc2[nH]c(S(=O)Cc3ncc(C)c(OC)c3C)nc2n1	8344500, 11798175, 11798199	nan	11798199, 8344500, 11798175
D01922	Pratosartan (JAN/INN); KD 3-671	CCCc1nc2c(n1Cc1ccc(-c3ccccc3-c3nnn[nH]3)cc1)C(=O)CCCC2	8171170	nan	8171170
D01924	Stearyl alcohol (JP17/NF)	CCCCCCCCCCCCCCCCCCO	1362907	nan	1362907
D01938	Pyrithione zinc (USAN/INN); Zinc pyrithione (JAN); Sebulon shampoo (TN)	[O-]n1ccccc1=S.[O-]n1ccccc1=S.[Zn+2]	nan	C13427	C13427
D01939	Ziprasidone hydrochloride (USP); Ziprasidone hydrochloride hydrate (JAN); Geodon (TN)	Cl.O.O=C1Cc2cc(CCN3CCN(c4nsc5ccccc45)CC3)c(Cl)cc2N1	13262593, 11329780	nan	13262593, 11329780
D01942	Chlorobutanol (JP17/NF/INN); Chloretone (TN)	CC(C)(O)C(Cl)(Cl)Cl	878167	nan	878167
D01947	Glyceryl monostearate (JP17/NF)	CCCCCCCCCCCCCCCCCC(=O)OCC(O)CO	1728685	nan	1728685
D01949	Cefaloglycin (JAN); Cephaloglycin anhdyous; CEG	CC(=O)OCC1=C(C(=O)O)N2C(=O)C(NC(=O)C(N)c3ccccc3)C2SC1	633119	nan	633119
D01951	Todralazine hydrochloride	CCOC(=O)NNc1nncc2ccccc12.Cl	3753173	nan	3753173
D01952	L-Methylephedrine hydrochloride (JAN)	CC(C(O)c1ccccc1)N(C)C.Cl	6576799, 6576798	C13639	6576799, 6576798
D01954	Sulfaphenazole (JAN/INN); Sulphaphenazole; Sulfabid (TN)	Nc1ccc(S(=O)(=O)Nc2ccnn2-c2ccccc2)cc1	308518	nan	308518
D01957	Bemegride (JAN/INN); Megibal (TN)	CCC1(C)CC(=O)NC(=O)C1	116672	nan	116672
D01959	Tannic acid (JP17/USP); Tannic acid (TN)	O=C(OCC1OC(OC(=O)c2cc(O)c(O)c(OC(=O)c3cc(O)c(O)c(O)c3)c2)C(OC(=O)c2cc(O)c(O)c(OC(=O)c3cc(O)c(O)c(O)c3)c2)C(OC(=O)c2cc(O)c(O)c(OC(=O)c3cc(O)c(O)c(O)c3)c2)C1OC(=O)c1cc(O)c(O)c(OC(=O)c2cc(O)c(O)c(O)c2)c1)c1cc(O)c(O)c(OC(=O)c2cc(O)c(O)c(O)c2)c1	nan	C13452	C13452
D01963	Ibufenac (JAN/USAN/INN); Dytransin (TN)	CC(C)Cc1ccc(CC(=O)O)cc1	2046683	nan	2046683
D01965	Silodosin (JP17/INN); KMD 3213; Rapaflo (TN); Urief (TN)	CC(Cc1cc2c(c(C(N)=O)c1)N(CCCO)CC2)NCCOc1ccccc1OCC(F)(F)F	22623651	nan	22623651
D01966	Ezetimibe (JAN/USP/INN); Zetia (TN)	O=C1C(CCC(O)c2ccc(F)cc2)C(c2ccc(O)cc2)N1c1ccc(F)cc1	11745669	nan	11745669
D01968	Zoledronic acid (USAN); Zoledronic acid hydrate (JAN); Zometa (TN)	O.O=P(O)(O)C(O)(Cn1ccnc1)P(=O)(O)O	14574236, 9667036	nan	9667036, 14574236
D01969	Gallopamil hydrochloride (JAN)	COc1ccc(CCN(C)CCCC(C#N)(c2cc(OC)c(OC)c(OC)c2)C(C)C)cc1OC.Cl	6465359	nan	6465359
D01971	Reglitazar (JAN/INN)	Cc1oc(-c2ccccc2)nc1CCOc1ccc(CC2C(=O)NOC2=O)cc1	8015479	nan	8015479
D01973	Eletriptan hydrobromide (JAN/USAN); Relpax (TN)	Br.CN1CCCC1Cc1c[nH]c2ccc(CCS(=O)(=O)c3ccccc3)cc12	20878863	nan	20878863
D01974	Tilmacoxib (JAN/USAN/INN)	Cc1nc(C2CCCCC2)c(-c2ccc(S(N)(=O)=O)c(F)c2)o1	9005354	nan	9005354
D01975	Fentiazac (JAN/USAN/INN)	O=C(O)Cc1sc(-c2ccccc2)nc1-c1ccc(Cl)cc1	1083610	nan	1083610
D01977	Gefitinib (JAN/USAN/INN); Iressa (TN)	COc1cc2ncnc(Nc3ccc(F)c(Cl)c3)c2cc1OCCCN1CCOCC1	8949523	nan	8949523
D01980	Luliconazole (JAN/USAN/INN); Lulicon (TN); Luzu (TN)	N#CC(=C1SCC(c2ccc(Cl)cc2Cl)S1)n1ccnc1	30039886	nan	30039886
D01988	Metofluthrin (JAN)	CC=CC1C(C(=O)OCc2c(F)c(F)c(COC)c(F)c2F)C1(C)C	11603729	nan	11603729
D01994	Mosapride citrate hydrate (JP17); Mosapride citrate dihydrate; Gasmotin (TN)	CCOc1cc(N)c(Cl)cc1C(=O)NCC1CN(Cc2ccc(F)cc2)CCO1.O.O.O=C(O)CC(O)(CC(=O)O)C(=O)O	nan	C13494	C13494
D02003	Nitroblue tetrazolium chloride (JAN); NBT	COc1cc(-c2ccc(-[n+]3nc(-c4ccccc4)nn3-c3ccc([N+](=O)[O-])cc3)c(OC)c2)ccc1-[n+]1nc(-c2ccccc2)nn1-c1ccc([N+](=O)[O-])cc1.[Cl-].[Cl-]	nan	C13503	C13503
D02017	Oxtriphylline (USP); Choline theophyllinate (INN); Choline theophylline (JAN); Theophyline and choline; Theocolin (TN)	C[N+](C)(C)CCO.Cn1c(=O)c2[n-]cnc2n(C)c1=O	4928440	nan	4928440
D02022	Prochlorperazine mesilate (JAN); Prochlorperazine dimethanesulfonate; Novamin (TN)	CN1CCN(CCCN2c3ccccc3Sc3ccc(Cl)cc32)CC1.CS(=O)(=O)O.CS(=O)(=O)O	nan	C13524	C13524
D02027	Tranilast (JP17/USAN/INN); Rizaben (TN)	COc1ccc(C=CC(=O)Nc2ccccc2C(=O)O)cc1OC	3987703	nan	3987703
D02030	Levocarnitine chloride (JAN); L-cartin (TN)	C[N+](C)(C)CC(O)CC(=O)O.[Cl-]	4163212, 4848049, 4848048	nan	4848049, 4848048, 4163212
D02035	Timiperone (JAN); Tolopelon (TN)	O=C(CCCN1CCC(n2c(=S)[nH]c3ccccc32)CC1)c1ccc(F)cc1	853689	nan	853689
D02045	Benidipine hydrochloride (JP17); KW 3049; Coniel (TN)	COC(=O)C1=C(C)NC(C)=C(C(=O)OC2CCCN(Cc3ccccc3)C2)C1c1cccc([N+](=O)[O-])c1.Cl	6679071	nan	6679071
D02049	Colistimethate sodium (USP); Colistin sodium methanesulfonate (JP17); Coly-Mycin M (TN); Methacolimycin (TN)	[*]NC(CCNCS(=O)(=O)[O-])C(=O)NC(C(=O)NC(CCNCS(=O)(=O)[O-])C(=O)NC1CCNC(=O)C(C(C)O)NC(=O)C(CCNCS(=O)(=O)[O-])NC(=O)C(CCNCS(=O)(=O)[O-])NC(=O)C(CC(C)C)NC(=O)C(CC(C)C)NC(=O)C(CCNCS(=O)(=O)[O-])NC1=O)C(C)O.[Na+].[Na+].[Na+].[Na+].[Na+]	nan	C13553	C13553
D02050	Potassium phosphate, monobasic (JAN/NF)	O=P([O-])(O)O.[K+]	11330307, 20554382, 16624200, 11343563	nan	11343563, 11330307, 20554382, 16624200
D02051	Potassium nitrate (JAN/USP); Sensodyne (TN)	O=[N+]([O-])[O-].[K+]	16015364, 18106624, 16033079, 22517508	C13557	16033079, 18106624, 16015364, 22517508
D02052	Barium sulfate (JP17/USP); Baricon (TN)	O=S(=O)([O-])[O-].[Ba+2]	16861787, 16508840, 27739407, 11343139	nan	16508840, 11343139, 27739407, 16861787
D02053	Potassium permanganate (JP17/USP); Potassium permanganate (TN)	O=[Mn](=O)(=O)[O-].[K+]	11343348, 29305284	nan	11343348, 29305284
D02056	Sodium chloride (JP17/USP); Adsorbanac (TN)	[Cl-].[Na+]	nan	C13563	C13563
D02059	Sodium bisulfite (JP17); Sodium bisulfite (TN)	O=S([O-])O.[Na+]	4933629	nan	4933629
D02061	Cyclopenthiazide (JAN/USAN/INN); Navidrex (TN)	NS(=O)(=O)c1cc2c(cc1Cl)NC(CC1CCCC1)NS2(=O)=O	630346, 6576871, 6576870	nan	630346, 6576870, 6576871
D02064	Pridinol mesilate (JAN); Pridinol methanesulfonate; Konlax (TN)	CS(=O)(=O)O.OC(CCN1CCCCC1)(c1ccccc1)c1ccccc1	13488625	nan	13488625
D02067	Diphenylimidazole (JAN)	c1ccc(-c2nc[nH]c2-c2ccccc2)cc1	157587	nan	157587
D02068	Tacrine hydrochloride (USP); Cognex (TN)	Cl.Nc1c2c(nc3ccccc13)CCCC2	3715548, 26904964	nan	3715548, 26904964
D02070	Homatropine methylbromide (USP); Equipin (TN)	C[N+]1(C)C2CCC1CC(OC(=O)C(O)c1ccccc1)C2.[Br-]	3923192	nan	3923192
D02075	Sodium gualenate (INN); Sodium guaiazulenesulfonate; Azunol ST (TN)	Cc1cc(S(=O)(=O)[O-])c2c(C)ccc(C(C)C)cc1-2.[Na+]	3797907	nan	3797907
D02077	Potassium bicarbonate (USP); Potassium hydrogencarbonate; K-vescent (TN)	O=C([O-])O.[K+]	13205350, 4535309, 15905694	C18606	4535309, 13205350, 15905694
D02081	Metipranolol hydrochloride; Optipranolol (TN)	CC(=O)Oc1c(C)cc(OCC(O)CNC(C)C)c(C)c1C.Cl	nan	C13591	C13591
D02082	Eprosartan mesylate (USAN); Teveten (TN)	CCCCc1ncc(C=C(Cc2cccs2)C(=O)O)n1Cc1ccc(C(=O)O)cc1.CS(=O)(=O)O	14539452	nan	14539452
D02086	Lidocaine hydrochloride (JAN/USP); Dalcaine (TN); Xylocaine (TN)	CCN(CC)CC(=O)Nc1c(C)cccc1C.Cl	3917968, 24630055	nan	3917968, 24630055
D02087	Moricizine hydrochloride (USP); Ethmozine (TN)	CCOC(=O)Nc1ccc2c(c1)N(C(=O)CCN1CCOCC1)c1ccccc1S2.Cl	5212239	nan	5212239
D02088	Tocainide hydrochloride (USP); Tonocard (TN)	Cc1cccc(C)c1NC(=O)C(C)N.Cl	5314055	nan	5314055
D02091	Tripelennamine hydrochloride (USP); PBZ-SR (TN)	CN(C)CCN(Cc1ccccc1)c1ccccn1.Cl	4037534, 22381309	nan	22381309, 4037534
D02094	Thiamine hydrochloride (USP); Thiamine chloride hydrochloride (JP17); Thiamine HCL (TN)	Cc1ncc(C[n+]2csc(CCO)c2C)c(N)n1.Cl.[Cl-]	26637002, 16743060, 3851771	nan	3851771, 26637002, 16743060
D02098	Proparacaine hydrochloride (USP); Alcaine (TN); Ophthetic (TN)	CCCOc1ccc(C(=O)OCCN(CC)CC)cc1N.Cl	3754950	nan	3754950
D02102	Methadone hydrochloride (JAN/USP); Dolophine hydrochloride (TN)	CCC(=O)C(CC(C)N(C)C)(c1ccccc1)c1ccccc1.Cl	3919789	nan	3919789
D02107	Indium In 111 chloride (USP); Indium (111In) chloride injection (JP17); Indiclor (TN)	Cl[In](Cl)Cl	3903075	nan	3903075
D02109	dl-Methylephedrine hydrochloride (JP17); Methy-F (TN)	CC(C(O)c1ccccc1)N(C)C.Cl	6576799, 6576798	C13639	6576799, 6576798
D02114	Hydroxychloroquine sulfate (JAN/USP); Plaquenil (TN)	CCN(CCO)CCCC(C)Nc1ccnc2cc(Cl)ccc12.O=S(=O)(O)O	7242072	nan	7242072
D02119	Ampicillin sodium (JP17/USP); Omnipen-N (TN); Viccillin (TN)	CC1(C)SC2C(NC(=O)C(N)c3ccccc3)C(=O)N2C1C(=O)[O-].[Na+]	18259598, 1231014	nan	18259598, 1231014
D02138	Colistin sulfate (JP17/USP); Coly-Mycin S; Colymycin S (TN)	O=S(=O)(O)O.O=S(=O)(O)O.O=S(=O)(O)O.O=S(=O)(O)O.O=S(=O)(O)O.[*]CC(C)CCCCC(=O)NC(CCN)C(=O)NC(C(=O)NC(CCN)C(=O)NC1CCNC(=O)C(C(C)O)NC(=O)C(CCN)NC(=O)C(CCN)NC(=O)C(CC(C)C)NC(=O)C(CC(C)C)NC(=O)C(CCN)NC1=O)C(C)O.[*]CC(C)CCCCC(=O)NC(CCN)C(=O)NC(C(=O)NC(CCN)C(=O)NC1CCNC(=O)C(C(C)O)NC(=O)C(CCN)NC(=O)C(CCN)NC(=O)C(CC(C)C)NC(=O)C(CC(C)C)NC(=O)C(CCN)NC1=O)C(C)O	nan	C13768	C13768
D02145	Piperazine adipate (JP17/USP); Camin AP (TN)	C1CNCCN1.O=C(O)CCCCC(=O)O	nan	C13811	C13811
D02147	Albuterol (USP); Salbutamol; Proventil (TN)	CC(C)(C)NCC(O)c1ccc(O)c(CO)c1	2213614	nan	2213614
D02149	Epinephrine bitartrate (JAN/USP); Asmatane mist (TN); Medihaler-epi (TN)	CNCC(O)c1ccc(O)c(O)c1.O=C(O)C(O)C(O)C(=O)O	5416626	nan	5416626
D02150	l-Isoprenaline hydrochloride (JP17); Proternol-L (TN)	CC(C)NCC(O)c1ccc(O)c(O)c1.Cl	4789452, 3917363	nan	3917363, 4789452
D02151	Tulobuterol (JP17/INN); Atenos (TN); Hokunalin (TN)	CC(C)(C)NCC(O)c1ccccc1Cl	2211496	nan	2211496
D02159	Undecylenic acid (JAN/USP); Cruex (TN)	C=CCCCCCCCCC(=O)O	1762631	C13910	1762631
D02160	Pyrithioxine (JAN); Pyritinol (INN)	Cc1ncc(CSSCc2cnc(C)c(O)c2CO)c(CO)c1O	574678	nan	574678
D02161	Ioxilan (JAN/USP/INN); Oxilan-300 (TN)	CC(=O)N(CC(O)CO)c1c(I)c(C(=O)NCCO)c(I)c(C(=O)NCC(O)CO)c1I	13601028	nan	13601028
D02162	Chlorprothixene hydrochloride (JAN)	CN(C)CCC=C1c2ccccc2Sc2ccc(Cl)cc21.Cl	3920215	nan	3920215
D02164	Cetrimide (JAN)	CCCCCCCCCCCCCC[N+](C)(C)C.[Br-]	3633227	C11279	3633227
D02168	Topotecan hydrochloride (USAN); Nogitecan hydrochloride (JAN); Hycamtin (TN); Potactasol (TN)	CCC1(O)C(=O)OCc2c1cc1n(c2=O)Cc2cc3c(CN(C)C)c(O)ccc3nc2-1.Cl	15487974	nan	15487974
D02170	Indeloxazine hydrochloride (JAN/USAN)	C1=Cc2cccc(OCC3CNCCO3)c2C1.Cl	5779960, 4030717, 5779961	nan	5779961, 5779960, 4030717
D02176	Levocarnitine (JAN/USP/INN); L-Carnitine; Carnitor (TN)	C[N+](C)(C)CC(O)CC(=O)[O-]	14351349, 1866665, 5732837, 8901933	nan	1866665, 14351349, 5732837, 8901933
D02178	Grepafloxacin hydrochloride (JAN/USAN); GPFX; Raxar (TN)	Cc1c(F)c(N2CCNC(C)C2)cc2c1c(=O)c(C(=O)O)cn2C1CC1.Cl	7506121	nan	7506121
D02179	Pyridoxine hydrochloride (JP17/USP); Hexa-betalin (TN)	Cc1ncc(CO)c(CO)c1O.Cl	26765148, 3632435	nan	3632435, 26765148
D02182	Cocaine hydrochloride (JP17/USP); Cocaine hydrochloride (TN)	COC(=O)C1C(OC(=O)c2ccccc2)CC2CCC1N2C.Cl	4302863	nan	4302863
D02183	Sodium lactate (JAN/USP); Mediject L (TN)	CC(O)C(=O)[O-].[Na+]	4332999, 9289743	nan	9289743, 4332999
D02193	Echothiophate iodide (USP); Ecothiopate iodide (JP17/INN); Phospholine iodide (TN)	CCOP(=O)(OCC)SCC[N+](C)(C)C.[I-]	3762945	nan	3762945
D02206	Buformin hydrochloride (JP17); Dibetos-B (TN)	CCCCNC(=N)NC(=N)N.Cl	3627999	nan	3627999
D02208	Sultopride hydrochloride (JAN); Sultopride monohydrochloride; Barnetil (TN)	CCN1CCCC1CNC(=O)c1cc(S(=O)(=O)CC)ccc1OC.Cl	6624415	nan	6624415
D02216	Ciprofloxacin hydrochloride (USP); Ciprofloxacin hydrochloride hydrate (JP17); CPFX; Ciloxan (TN); Cipro (TN); Proquin XR (TN)	Cl.O.O=C(O)c1cn(C2CC2)c2cc(N3CCNCC3)c(F)cc2c1=O	13474821	C13993	13474821
D02217	Raloxifene hydrochloride (JAN/USP); LY 156758; Evista (TN)	Cl.O=C(c1ccc(OCCN2CCCCC2)cc1)c1c(-c2ccc(O)cc2)sc2cc(O)ccc12	6036780	nan	6036780
D02218	Papaverine hydrochloride (JP17/USP); Pavabid (TN)	COc1ccc(Cc2nccc3cc(OC)c(OC)cc23)cc1OC.Cl	3921435	nan	3921435
D02220	Dibucaine hydrochloride (JP17/USP); Nupercaine hydrochloride (TN); Percamin (TN)	CCCCOc1cc(C(=O)NCCN(CC)CC)c2ccccc2n1.Cl	3770332	nan	3770332
D02223	Sulbactam sodium (JP17/USP); SBT	CC1(C)C(C(=O)[O-])N2C(=O)CC2S1(=O)=O.[Na+]	1137390	nan	1137390
D02229	Sildenafil citrate (JAN/USP); Revatio (TN); Viagra (TN)	CCCc1nn(C)c2c(=O)[nH]c(-c3cc(S(=O)(=O)N4CCN(C)CC4)ccc3OCC)nc12.O=C(O)CC(O)(CC(=O)O)C(=O)O	9892846	nan	9892846
D02240	Diatrizoic acid (USP); Amidotrizoic acid (JP17)	CC(=O)Nc1c(I)c(NC(C)=O)c(I)c(C(=O)O)c1I	2225144	nan	2225144
D02242	Methamphetamine hydrochloride (JP17/USP); Desoxyn (TN)	CNC(C)Cc1ccccc1.Cl	4155698	nan	4155698
D02243	Meclofenoxate hydrochloride (JP17); Lucidril (TN)	CN(C)CCOC(=O)COc1ccc(Cl)cc1.Cl	3637332	nan	3637332
D02252	Amobarbital sodium (JAN/USP); Amytal sodium (TN)	CCC1(CCC(C)C)C(=O)N=C([O-])NC1=O.[Na+]	662085	nan	662085
D02255	Chlortetracycline hydrochloride (JAN/USP); CTC; Aureomycin (TN)	CN(C)C1C(O)=C(C(N)=O)C(=O)C2(O)C(O)=C3C(=O)c4c(O)ccc(Cl)c4C(C)(O)C3CC12.Cl	17006461	nan	17006461
D02277	Sodium benzoate (JP17/NF); Sodium benzoate (TN)	O=C([O-])c1ccccc1.[Na+]	1100243	nan	1100243
D02279	Lysine hydrochloride (USP); L-Lysine hydrochloride (JP17); L-Lysine monohydrochloride	Cl.NCCCCC(N)C(=O)O	4153968, 4711994, 5113177, 6071151	nan	6071151, 4153968, 4711994, 5113177
D02283	Iomazenil (123I) (JAN/INN); Benzodine (TN)	CCOC(=O)c1ncn2c1CN(C)C(=O)c1c(I)cccc1-2	8157203	nan	8157203
D02291	Levmetamfetamine (USP/INN)	CNC(C)Cc1ccccc1	1072499, 5248384, 7410286	nan	5248384, 1072499, 7410286
D02296	Isopropyl myristate (NF); Estergel (TN)	CCCCCCCCCCCCCC(=O)OC(C)C	1781127	nan	1781127
D02299	Cefazolin (USP); CEZ	Cc1nnc(SCC2=C(C(=O)O)N3C(=O)C(NC(=O)Cn4cnnn4)C3SC2)s1	634703	nan	634703
D02301	Oxolinic acid (USAN/INN); OA; Aqualinic (TN)	CCn1cc(C(=O)O)c(=O)c2cc3c(cc21)OCO3	620635	C11342	620635
D02302	Flumequine (USAN/INN); FLM; Apurone (TN)	CC1CCc2cc(F)cc3c(=O)c(C(=O)O)cn1c23	490724	nan	490724
D02303	Miloxacin (INN); MIL	COn1cc(C(=O)O)c(=O)c2cc3c(cc21)OCO3	553059	nan	553059
D02304	Lysine (USAN/INN); L-Lysine	NCCCCC(N)C(=O)O	3587988, 6130918, 1616991	C16440	3587988, 1616991, 6130918
D02305	Rosoxacin (USAN/INN); ROS; Roxadyl (TN)	CCn1cc(C(=O)O)c(=O)c2ccc(-c3ccncc3)cc21	758231	nan	758231
D02306	Pefloxacin (USAN/INN); PFLX	CCn1cc(C(=O)O)c(=O)c2cc(F)c(N3CCN(C)CC3)cc21	567618	nan	567618
D02307	Pefloxacin mesylate (USAN)	CCn1cc(C(=O)O)c(=O)c2cc(F)c(N3CCN(C)CC3)cc21.CS(=O)(=O)O	4092574	nan	4092574
D02308	Fumaric acid (NF)	O=C(O)C=CC(=O)O	8132074	nan	8132074
D02313	Nitric acid (NF); Nitrate	O=[N+]([O-])O	3587310	C00244	3587310
D02314	Benzaldehyde (NF)	O=Cc1ccccc1	471223, 3931460, 4176385	C00193, C00261	4176385, 3931460, 471223
D02315	Oleic acid (NF)	CCCCCCCCC=CCCCCCCCC(=O)O	1726541	nan	1726541
D02317	Tosufloxacin (USAN); TFLX	NC1CCN(c2nc3c(cc2F)c(=O)c(C(=O)O)cn3-c2ccc(F)cc2F)C1	4913117	nan	4913117
D02318	Lomefloxacin (USAN); LFLX	CCn1cc(C(=O)O)c(=O)c2cc(F)c(N3CCNC(C)C3)c(F)c21	4210041	C07078	4210041
D02321	Amsacrine (USAN/INN); Amsidyl (TN)	COc1cc(NS(C)(=O)=O)ccc1Nc1c2ccccc2nc2ccccc12	500176	C01553	500176
D02323	Tolrestat (USAN/INN); Alredase (TN)	COc1ccc2c(C(=S)N(C)CC(=O)O)cccc2c1C(F)(F)F	4208277	C01621	4208277
D02325	Dextrose (USP); Glucose hydrate (JP17); alpha-D-Glucose monohydrate; Cartose (TN)	O.OCC1OC(O)C(O)C(O)C1O	18200197	nan	18200197
D02326	Cysteine hydrochloride (USP); L-Cysteine hydrochloride hydrate (JP17); Elcys (TN)	Cl.NC(CS)C(=O)O.O	13248136, 16969492	nan	16969492, 13248136
D02327	Doxylamine succinate (USP); Decapryn (TN)	CN(C)CCOC(C)(c1ccccc1)c1ccccn1.O=C(O)CCC(=O)O	32285476, 3829474	C19414	32285476, 3829474
D02328	Zopolrestat (USAN/INN); Alond (TN)	O=C(O)Cc1nn(Cc2nc3cc(C(F)(F)F)ccc3s2)c(=O)c2ccccc12	nan	C01865	C01865
D02332	Tocopherol (JP17); dl-alpha-Tocopherol	Cc1c(C)c2c(c(C)c1O)CCC(C)(CCCC(C)CCCC(C)CCCC(C)C)O2	10402782, 10402781, 7887805, 5483892, 1296133, 10402780, 4712525, 5153237, 10402779	nan	5153237, 10402781, 5483892, 4712525, 1296133, 10402782, 7887805, 10402779, 10402780
D02335	Menadione (USP); Kappaxin (TN)	CC1=CC(=O)c2ccccc2C1=O	4746019, 1908453	C05377	1908453, 4746019
D02336	Benzylpenicillin (INN); Penicillin G; PCG	CC1(C)SC2C(NC(=O)Cc3ccccc3)C(=O)N2C1C(=O)O	626619	nan	626619
D02338	Acebutolol (USAN/INN)	CCCC(=O)Nc1ccc(OCC(O)CNC(C)C)c(C(C)=O)c1	2162244	C06803	2162244
D02340	Loxapine (USAN/INN); Adasuve (TN)	CN1CCN(C2=Nc3ccccc3Oc3ccc(Cl)cc32)CC1	626753	C07104	626753
D02341	Meclofenamic acid (USAN/INN)	Cc1ccc(Cl)c(Nc2ccccc2C(=O)O)c1Cl	2221428	C07117	2221428
D02342	Bisoprolol (JAN/USAN/INN)	CC(C)NCC(O)COc1ccc(COCCOC(C)C)cc1	3975317	C06852	3975317
D02347	Dantrolene (USAN/INN)	O=C1CN(N=Cc2ccc(-c3ccc([N+](=O)[O-])cc3)o2)C(=O)N1	705189	nan	705189
D02349	Dipivefrin (USAN); Dipivefrine (INN)	CNCC(O)c1ccc(OC(=O)C(C)(C)C)c(OC(=O)C(C)(C)C)c1	2165183	C06963	2165183
D02350	Fenoprofen (USAN/INN)	CC(C(=O)O)c1cccc(Oc2ccccc2)c1	6314796, 6314795, 2118687	C06997	6314795, 6314796, 2118687
D02351	Mafenide (USAN/INN)	NCc1ccc(S(N)(=O)=O)cc1	1103697	C07106	1103697
D02353	Cefadroxil (USP); Cefadroxil monohydrate; Duricef (TN)	CC1=C(C(=O)O)N2C(=O)C(NC(=O)C(N)c3ccc(O)cc3)C2SC1.O	17835835	nan	17835835
D02354	Thiethylperazine (USAN/INN)	CCSc1ccc2c(c1)N(CCCN1CCN(C)CC1)c1ccccc1S2	52127	C07132	52127
D02355	Tolmetin (USAN/INN)	Cc1ccc(C(=O)c2ccc(CC(=O)O)n2C)cc1	485305	C07149	485305
D02356	Verapamil (USAN/INN)	COc1ccc(CCN(C)CCCC(C#N)(c2ccc(OC)c(OC)c2)C(C)C)cc1OC	2825000	C07188	2825000
D02358	Metoprolol (USAN/INN)	COCCc1ccc(OCC(O)CNC(C)C)cc1	1117585	C07202	1117585
D02360	Sertraline (INN)	CNC1CCC(c2ccc(Cl)c(Cl)c2)c2ccccc21	14316287, 11870504, 13863556	nan	11870504, 13863556, 14316287
D02361	Propiomazine (USAN/INN)	CCC(=O)c1ccc2c(c1)N(CC(C)N(C)C)c1ccccc1S2	39712	C07405	39712
D02362	Paroxetine (USP/INN); Paroxetine (TN)	Fc1ccc(C2CCNCC2COc2ccc3c(c2)OCO3)cc1	10487609, 6895322	nan	10487609, 6895322
D02363	Ketanserin (USAN/INN)	O=C(c1ccc(F)cc1)C1CCN(CCn2c(=O)[nH]c3ccccc3c2=O)CC1	4913068	C07464	4913068
D02365	Oxypurinol (USAN); Oxipurinol (INN)	Oc1nc(O)c2cn[nH]c2n1	610971	C07599	610971
D02366	Chloroquine (USP/INN)	CCN(CC)CCCC(C)Nc1ccnc2cc(Cl)ccc12	482809	C07625	482809
D02368	Gemcitabine (USAN/INN)	Nc1ccn(C2OC(CO)C(O)C2(F)F)c(=O)n1	11499718	nan	11499718
D02373	Etidronic acid (USAN/INN)	CC(O)(P(=O)(O)O)P(=O)(O)O	17719954, 1789291	C07736	17719954, 1789291
D02374	Metipranolol (USAN/INN)	CC(=O)Oc1c(C)cc(OCC(O)CNC(C)C)c(C)c1C	nan	C07915	C07915
D02375	Terbinafine (USAN/INN); Lamasil (TN)	CN(CC=CC#CC(C)(C)C)Cc1cccc2ccccc12	7465057	nan	7465057
D02377	Anethole (NF)	CC=Cc1ccc(OC)cc1	774229, 6645140	nan	774229, 6645140
D02378	Acronine (USAN/INN); Acronine (TN)	COc1cc2c(c3c1c(=O)c1ccccc1n3C)C=CC(C)(C)O2	312954	C10632	312954
D02379	Diethyltoluamide (USP/INN); DEET	CCN(CC)C(=O)c1cccc(C)c1	2046711	C10935	2046711
D02380	Amitraz (USP/INN)	Cc1ccc(N=CN(C)C=Nc2ccc(C)cc2C)c(C)c1	2946590	nan	2946590
D02381	Aspartame (NF/INN)	COC(=O)C(Cc1ccccc1)NC(=O)C(N)CC(=O)O	18250135, 4707041, 13207274	nan	4707041, 18250135, 13207274
D02382	Propyl gallate (NF)	CCCOC(=O)c1cc(O)c(O)c(O)c1	1877976, 5063653	C11155	5063653, 1877976
D02383	Prenylamine (USAN/INN)	CC(Cc1ccccc1)NCCC(c1ccccc1)c1ccccc1	2060323	nan	2060323
D02385	Levcromakalim (USAN/INN); Lemakalim	CC1(C)Oc2ccc(C#N)cc2C(N2CCCC2=O)C1O	6770840, 8781733, 6770841	C11819	8781733, 6770841, 6770840
D02386	Ticrynafen (USAN); Tienilic acid (INN); Selacryn (TN)	O=C(O)COc1ccc(C(=O)c2cccs2)c(Cl)c1Cl	1260086	C11702	1260086
D02387	Cycloguanil pamoate (USAN); Cycloguanil embonate (INN)	CC1(C)N=C(N)N=C(N)N1c1ccc(Cl)cc1.CC1(C)N=C(N)N=C(N)N1c1ccc(Cl)cc1.O=C(O)c1cc2ccccc2c(Cc2c(O)c(C(=O)O)cc3ccccc23)c1O	nan	C11724	C11724
D02388	Levonordefrin (USP); Corbadrine (INN); Neo-cobefrin (TN)	CC(N)C(O)c1ccc(O)c(O)c1	nan	C17925	C17925
D02389	Primidolol (USAN/INN)	Cc1ccccc1OCC(O)CNCCn1cc(C)c(=O)[nH]c1=O	nan	C11774	C11774
D02393	Resorcinol monoacetate (USP); Euresol (TN)	CC(=O)Oc1cccc(O)c1	1865490	C12064	1865490
D02401	Betadex (NF/INN)	OCC1OC2OC3C(CO)OC(OC4C(CO)OC(OC5C(CO)OC(OC6C(CO)OC(OC7C(CO)OC(OC8C(CO)OC(OC1C(O)C2O)C(O)C8O)C(O)C7O)C(O)C6O)C(O)C5O)C(O)C4O)C(O)C3O	16828038, 4651857	nan	16828038, 4651857
D02402	Thallous chloride Tl 201 (USP); Thallium (201Tl) chloride injection (JP17); Thallous chloride Tl 201 (TN)	[Cl-].[TlH2+]	nan	C15226	C15226
D02403	Potassium phosphate, dibasic (JAN/USP); Mediject P (TN)	O=P([O-])([O-])O.[K+].[K+]	nan	C13197	C13197
D02404	Procaterol hydrochloride (USAN); Pro-Air (TN)	CCC(NC(C)C)C(O)c1ccc(O)c2[nH]c(=O)ccc12.Cl	6757799, 7106178	C13235	7106178, 6757799
D02407	Lidamidine hydrochloride (USAN)	CNC(=N)NC(=O)Nc1c(C)cccc1C.Cl	6546211	nan	6546211
D02409	Caffeine and sodium benzoate (JP17); Sodium caffeine benzoate; Annaca (TN)	Cn1c(=O)c2c(ncn2C)n(C)c1=O.O=C([O-])c1ccccc1.[Na+]	nan	C13403	C13403
D02411	Potassium sorbate (NF)	CC=CC=CC(=O)[O-].[K+]	6087234	nan	6087234
D02412	Ascorbyl palmitate (NF)	CCCCCCCCCCCCCCCC(=O)OCC(O)C1OC(=O)C(O)=C1O	347248	nan	347248
D02413	Butylated hydroxytoluene (NF)	Cc1cc(C(C)(C)C)c(O)c(C(C)(C)C)c1	6597873, 30073827, 1911640, 30073826	C14693	30073826, 30073827, 1911640, 6597873
D02414	Oxyquinoline sulfate (NF)	O=S(=O)(O)O.Oc1cccc2cccnc12.Oc1cccc2cccnc12	nan	C18478	C18478
D02416	Aluminum hydroxide (USP); Aluminum hydroxide, dried (USP); Dried aluminum hydroxide gel (JP17); ALterna GEL (TN); Dialume (TN)	O[AlH3](O)O	4948997	nan	4948997
D02418	Physostigmine salicylate (JAN/USP); Antilirium (TN)	CNC(=O)Oc1ccc2c(c1)C1(C)CCN(C)C1N2C.O=C(O)c1ccccc1O	3900574	nan	3900574
D02419	Diphenhydramine salicylate (JAN)	CN(C)CCOC(c1ccccc1)c1ccccc1.O=C(O)c1ccccc1O	nan	C14015	C14015
D02424	Glyprothiazol (INN); IPTD	CC(C)c1nnc(NS(=O)(=O)c2ccc(N)cc2)s1	277747	nan	277747
D02425	Carbutamide (INN); Invenol (TN)	CCCCNC(=O)NS(=O)(=O)c1ccc(N)cc1	2218915	nan	2218915
D02426	Glycyclamide (INN); Tolcyclamide	Cc1ccc(S(=O)(=O)NC(=O)NC2CCCCC2)cc1	1995860	nan	1995860
D02429	Glisolamide (INN); Glysolamide; Diabenor (TN)	Cc1cc(C(=O)NCCc2ccc(S(=O)(=O)NC(=O)NC3CCCCC3)cc2)no1	1050609	nan	1050609
D02430	Gliquidone (INN); Glurenorm (TN)	COc1ccc2c(c1)C(=O)N(CCc1ccc(S(=O)(=O)NC(=O)NC3CCCCC3)cc1)C(=O)C2(C)C	1559726	nan	1559726
D02434	Sulfapyridine (USP/INN); Sulfapyridine (TN)	Nc1ccc(S(=O)(=O)Nc2ccccn2)cc1	222065	nan	222065
D02435	Sulfamerazine (INN)	Cc1ccnc(NS(=O)(=O)c2ccc(N)cc2)n1	249133	nan	249133
D02436	Sulfamethazine (USP); Sulfadimidine (INN); Sulfamezathine (TN)	Cc1cc(C)nc(NS(=O)(=O)c2ccc(N)cc2)n1	261304	C19530	261304
D02437	Sulfaguanidine (INN)	NC(N)=NS(=O)(=O)c1ccc(N)cc1	2695326	nan	2695326
D02438	Xyloylsulfamine	Cc1ccc(C(=O)NS(=O)(=O)c2ccc(N)cc2)cc1C	2150416	nan	2150416
D02439	Sulfamethoxypyridazine (INN); Lederkyn (TN)	COc1ccc(NS(=O)(=O)c2ccc(N)cc2)nn1	277076	nan	277076
D02440	Phthalylsulfathiazole (INN)	O=C(O)c1ccccc1C(=O)Nc1ccc(S(=O)(=O)Nc2nccs2)cc1	359901	C07659	359901
D02441	Ethoxzolamide; Cardrase (TN)	CCOc1ccc2nc(S(N)(=O)=O)sc2c1	212240	nan	212240
D02442	Cyclamic acid (USAN); Hexamic acid (TN)	O=S(=O)(O)NC1CCCCC1	2208885	C02824	2208885
D02443	Sodium cyclamate (INN)	O=S(=O)([O-])NC1CCCCC1.[Na+]	4166868	C19378	4166868
D02445	Tosylchloramide sodium (INN); Chloramine T	Cc1ccc(S(=O)(=O)[N-]Cl)cc1.[Na+]	3599375	nan	3599375
D02446	Halazone (USP/INN)	O=C(O)c1ccc(S(=O)(=O)N(Cl)Cl)cc1	2740018	nan	2740018
D02449	Sulfaethidole (INN); Sul-Spansion (TN)	CCc1nnc(NS(=O)(=O)c2ccc(N)cc2)s1	261474	nan	261474
D02453	Flumethiazide (INN); Ademol (TN)	NS(=O)(=O)c1cc2c(cc1C(F)(F)F)N=CNS2(=O)=O	45925	nan	45925
D02454	Hexylcaine hydrochloride; Cyclaine (TN)	CC(CNC1CCCCC1)OC(=O)c1ccccc1.Cl	3727661	nan	3727661
D02455	Piperocaine hydrochloride; Methycaine hydrochloride (TN)	CC1CCCCN1CCCOC(=O)c1ccccc1.Cl	6119560	nan	6119560
D02456	Aminobenzoic acid (USP); p-Aminobenzoic acid; RVPaba lipstick (TN)	Nc1ccc(C(=O)O)cc1	471605	C00568	471605
D02457	Acetrizoic acid	CC(=O)Nc1c(I)cc(I)c(C(=O)O)c1I	2219129	C14164	2219129
D02458	Methylparaben sodium (NF)	COC(=O)c1ccc([O-])cc1.[Na+]	4165000	nan	4165000
D02459	Propylparaben sodium (NF)	CCCOC(=O)c1ccc([O-])cc1.[Na+]	5183350	nan	5183350
D02462	Glybuthiazol (INN); Glybuthiazole	CC(C)(C)c1nnc(NS(=O)(=O)c2ccc(N)cc2)s1	33849	nan	33849
D02464	Ferric citrate (59 Fe)	O=C([O-])CC(O)(CC(=O)[O-])C(=O)[O-].[Fe+3]	4052503	nan	4052503
D02468	Tioxacin (INN)	CCn1cc(C(=O)O)c(=O)c2c3sc(=O)n(C)c3ccc21	1088328	nan	1088328
D02469	Temafloxacin hydrochloride (JAN/USAN); Omniflox (TN)	CC1CN(c2cc3c(cc2F)c(=O)c(C(=O)O)cn3-c2ccc(F)cc2F)CCN1.Cl	5844127	nan	5844127
D02471	Gemifloxacin mesylate (USAN); Factive (TN)	CON=C1CN(c2nc3c(cc2F)c(=O)c(C(=O)O)cn3C2CC2)CC1CN.CS(=O)(=O)O	9176911	nan	9176911
D02473	Enrofloxacin (USP/INN); ERFX; Baytril (TN)	CCN1CCN(c2cc3c(cc2F)c(=O)c(C(=O)O)cn3C2CC2)CC1	5307824	nan	5307824
D02474	Rufloxacin (INN)	CN1CCN(c2c(F)cc3c(=O)c(C(=O)O)cn4c3c2SCC4)CC1	4826451	C11240	4826451
D02478	Disulfamide (BAN)	Cc1cc(Cl)c(S(N)(=O)=O)cc1S(N)(=O)=O	2702245	nan	2702245
D02480	Diloxanide furoate (USP); Diloxanide furoate (TN)	CN(C(=O)C(Cl)Cl)c1ccc(OC(=O)c2ccco2)cc1	6153568	C07637	6153568
D02482	Artesunate (USAN); Artesunic acid; Arsumax (TN)	CC1CCC2C(C)C(OC(=O)CCC(=O)O)OC3OC4(C)CCC1C32OO4	7496318	nan	7496318
D02485	Halofantrine hydrochloride (USAN); Halfan (TN)	CCCCN(CCCC)CCC(O)c1cc2c(Cl)cc(Cl)cc2c2cc(C(F)(F)F)ccc12.Cl	5370935	nan	5370935
D02486	Nitazoxanide (USAN/INN); Alinia (TN)	CC(=O)Oc1ccccc1C(=O)Nc1ncc([N+](=O)[O-])s1	1225475	nan	1225475
D02487	Proguanil hydrochloride (JAN/USP); Chloroguanide hydrochloride; Paludrine (TN)	CC(C)NC(=N)NC(=N)Nc1ccc(Cl)cc1.Cl	3746378	nan	3746378
D02489	Benznidazole (USAN/INN); benznidazole (TN); Radanil (TN); Rochagan (TN)	O=C(Cn1ccnc1[N+](=O)[O-])NCc1ccccc1	551486	nan	551486
D02490	Tylosin (USP/INN); TS; Tylan (TN)	CCC1OC(=O)CC(O)C(C)C(OC2OC(C)C(OC3CC(C)(O)C(O)C(C)O3)C(N(C)C)C2O)C(CC=O)CC(C)C(=O)C=CC(C)=CC1COC1OC(C)C(O)C(OC)C1OC	5235302	nan	5235302
D02494	Miltefosine (INN); Impavido (TN)	CCCCCCCCCCCCCCCCOP(=O)([O-])OCC[N+](C)(C)C	3690495	nan	3690495
D02496	Methisazone (USAN); Metisazone (INN); Marboran	CN1C(=O)C(=NNC(N)=S)c2ccccc21	9703129	nan	9703129
D02500	Imiquimod (JAN/USP/INN); Aldara (TN); Zyclara (TN)	CC(C)Cn1cnc2c(N)nc3ccccc3c21	7710060	nan	7710060
D02507	Nihydrazone (INN)	CC(=O)NN=Cc1ccc([N+](=O)[O-])o1	28022035	nan	28022035
D02510	Furaltadone (INN); Altafur (TN)	O=C1OC(CN2CCOCC2)CN1N=Cc1ccc([N+](=O)[O-])o1	363627	nan	363627
D02511	Furalazine (prop.INN)	Nc1ncc(C=Cc2ccc([N+](=O)[O-])o2)nn1	538900	nan	538900
D02515	Nifuroxime (INN)	O=[N+]([O-])c1ccc(C=NO)o1	8308605	nan	8308605
D02516	Sulfamoxole (USAN/INN)	Cc1nc(NS(=O)(=O)c2ccc(N)cc2)oc1C	248434	nan	248434
D02517	Sulfameter (USAN); Sulfametoxydiazine (INN); Sulfamethoxypyrimidine; Sulla (TN)	COc1cnc(NS(=O)(=O)c2ccc(N)cc2)nc1	621130	nan	621130
D02518	Dihydroxymethylfuratrizine; Panfuran-S (TN)	O=[N+]([O-])c1ccc(C=Cc2cnc(N(CO)CO)nn2)o1	898525	nan	898525
D02522	Thiazosulfone (INN); Thiazolsulfone; Promizole (TN)	Nc1ccc(S(=O)(=O)c2cnc(N)s2)cc1	225446	nan	225446
D02537	Dronedarone (INN)	CCCCc1oc2ccc(NS(C)(=O)=O)cc2c1C(=O)c1ccc(OCCCN(CCCC)CCCC)cc1	8176529	nan	8176529
D02539	Clinafloxacin hydrochloride (USAN)	Cl.NC1CCN(c2c(F)cc3c(=O)c(C(=O)O)cn(C4CC4)c3c2Cl)C1	30046889, 7107995	nan	30046889, 7107995
D02547	Pamaquine; Plasmoquine [veterinary] (TN)	CCN(CC)CCCC(C)Nc1cc(OC)cc2cccnc12	27810	nan	27810
D02549	Rifamycin (USAN/INN); Rifamycin SV	COC1C=COC2(C)Oc3c(C)c(O)c4c(O)c(cc(O)c4c3C2=O)NC(=O)C(C)=CC=CC(C)C(O)C(C)C(O)C(C)C(OC(C)=O)C1C	604801	nan	604801
D02552	Rifamexil (USAN/INN)	CCN(CC)c1nc2c(s1)c1c(O)c3c(O)c(C)c4c(c32)C(=O)C(C)(OC=CC(OC)C(C)C(OC(C)=O)C(C)C(O)C(C)C(O)C(C)C=CC=C(C)C(=O)N1)O4	3645365	nan	3645365
D02554	Rifaximin (JAN/USAN/INN); Xifaxan (TN)	COC1C=COC2(C)Oc3c(C)c(O)c4c(O)c(c5c(nc6cc(C)ccn65)c4c3C2=O)NC(=O)C(C)=CC=CC(C)C(O)C(C)C(O)C(C)C(OC(C)=O)C1C	3584528	nan	3584528
D02556	Ravuconazole (prop.INN)	CC(c1nc(-c2ccc(C#N)cc2)cs1)C(O)(Cn1cncn1)c1ccc(F)cc1F	13140086	nan	13140086
D02557	Chlormidazole (INN)	Cc1nc2ccccc2n1Cc1ccc(Cl)cc1	614918	nan	614918
D02559	Toloxatone (INN); Humoryl (TN)	Cc1cccc(N2CC(CO)OC2=O)c1	527506	nan	527506
D02560	Brofaromine (INN); Consonar (TN)	COc1cc(Br)c2oc(C3CCNCC3)cc2c1	1121333	nan	1121333
D02561	Moclobemide (USAN/INN); Aurorix (TN)	O=C(NCCN1CCOCC1)c1ccc(Cl)cc1	530974	nan	530974
D02566	Maprotiline (USAN)	CNCCCC12CCC(c3ccccc31)c1ccccc12	2813772, 2385493	C07107	2385493, 2813772
D02567	Escitalopram oxalate (JAN/USP); Lexapro (TN)	CN(C)CCCC1(c2ccc(F)cc2)OCc2cc(C#N)ccc21.O=C(O)C(=O)O	13947374, 22085874, 13172929	nan	22085874, 13947374, 13172929
D02568	Flesinoxan (INN)	O=C(NCCN1CCN(c2cccc3c2OCC(CO)O3)CC1)c1ccc(F)cc1	5857782	nan	5857782
D02570	Desvenlafaxine succinate (USAN); Desvenlafaxine succinate hydrate (JAN); Pristiq (TN)	CN(C)CC(c1ccc(O)cc1)C1(O)CCCCC1.O.O=C(O)CCC(=O)O	18639753, 18639752, 21181393, 15625897	nan	15625897, 21181393, 18639753, 18639752
D02572	Viloxazine hydrochloride (USAN); Vivalan (TN)	CCOc1ccccc1OCC1CNCCO1.Cl	4163900	nan	4163900
D02573	Reboxetine mesylate (USAN); Reboxetine mesilate; Vestra (TN)	CCOc1ccccc1OC(c1ccccc1)C1CNCCO1.CS(=O)(=O)O	5700694	nan	5700694
D02574	Atomoxetine hydrochloride (JAN/USP); Tomoxetine hydrochloride; Strattera (TN)	CNCCC(Oc1ccccc1C)c1ccccc1.Cl	6691924	nan	6691924
D02575	Tianeptine (INN); Stablon (TN)	CN1c2ccccc2C(NCCCCCCC(=O)O)c2ccc(Cl)cc2S1(=O)=O	1232295	nan	1232295
D02576	Eptapirone (INN)	Cn1c(=O)cnn(CCCCN2CCN(c3ncccn3)CC2)c1=O	8347307	nan	8347307
D02577	Flibanserin (USAN/INN); Addyi (TN)	O=c1[nH]c2ccccc2n1CCN1CCN(c2cccc(C(F)(F)F)c2)CC1	8942243	nan	8942243
D02578	Agomelatine (INN); Valdoxan (TN)	COc1ccc2cccc(CCNC(C)=O)c2c1	5813634	nan	5813634
D02579	Iproniazid (INN)	CC(C)NNC(=O)c1ccncc1	142700	C11777	142700
D02580	Isocarboxazid (INN); Marplan (TN)	Cc1cc(C(=O)NNCc2ccccc2)no1	201295	nan	201295
D02582	Fenticonazole (INN)	Clc1ccc(C(Cn2ccnc2)OCc2ccc(Sc3ccccc3)cc2)c(Cl)c1	944026	nan	944026
D02583	Fenticonazole nitrate (USAN); Lomexin (TN)	Clc1ccc(C(Cn2ccnc2)OCc2ccc(Sc3ccccc3)cc2)c(Cl)c1.O=[N+]([O-])O	6564060	nan	6564060
D02585	Vibunazole; Bay N-7133	CC(C)(C)C(O)(COc1ccc(Cl)cc1)Cn1cncn1	4752604	nan	4752604
D02590	Israpafant (JAN/INN)	Cc1nnc2n1-c1sc(CCc3ccc(CC(C)C)cc3)cc1C(c1ccccc1Cl)=NC2C	7608385	nan	7608385
D02594	Abecarnil (INN)	COCc1c(C(=O)OC(C)C)ncc2[nH]c3ccc(OCc4ccccc4)cc3c12	3657541	nan	3657541
D02595	Mephenesin (INN); Tolserol (TN)	Cc1ccccc1OCC(O)CO	2047373	nan	2047373
D02599	Orphenadrine hydrochloride; Disipal (TN)	Cc1ccccc1C(OCCN(C)C)c1ccccc1.Cl	3745818	nan	3745818
D02600	Demoxepam (USAN/INN)	O=C1C[N+]([O-])=C(c2ccccc2)c2cc(Cl)ccc2N1	755892	nan	755892
D02601	Phenothiazine (INN); Thiodiphenylamin; Nemazine [veterinary] (TN)	c1ccc2c(c1)Nc1ccccc1S2	1216388, 143237	nan	1216388, 143237
D02602	Fenethazine (INN)	CN(C)CCN1c2ccccc2Sc2ccccc21	235029	nan	235029
D02603	Diethazine hydrochloride	CCN(CC)CCN1c2ccccc2Sc2ccccc21.Cl	3760626	nan	3760626
D02606	Pipamazine (INN)	NC(=O)C1CCN(CCCN2c3ccccc3Sc3ccc(Cl)cc32)CC1	583539	nan	583539
D02613	Clopenthixol (USAN)	OCCN1CCN(CCC=C2c3ccccc3Sc3ccc(Cl)cc32)CC1	899403	nan	899403
D02614	Denopamine (JAN/INN); Kalgut (TN)	COc1ccc(CCNCC(O)c2ccc(O)cc2)cc1OC	5592849	nan	5592849
D02616	Pagoclone (USAN/INN); Bextra (TN)	CC(C)CCC(=O)CC1c2ccccc2C(=O)N1c1ccc2ccc(Cl)nc2n1	11736584	nan	11736584
D02618	Butobarbital (BAN); Butethal; Neonal (TN)	CCCCC1(CC)C(=O)NC(=O)NC1=O	201786	nan	201786
D02619	Carbromal (INN); Adalin (TN)	CCC(Br)(CC)C(=O)NC(N)=O	1775637	nan	1775637
D02620	Azaperone (USP/INN); Stresnil (TN)	O=C(CCCN1CCN(c2ccccn2)CC1)c1ccc(F)cc1	565491	nan	565491
D02621	Fluanisone (INN)	COc1ccccc1N1CCN(CCCC(=O)c2ccc(F)cc2)CC1	707524	nan	707524
D02622	Pipamperone (USAN/INN); Floropipamide	NC(=O)C1(N2CCCCC2)CCN(CCCC(=O)c2ccc(F)cc2)CC1	496532	nan	496532
D02623	Moperone (INN)	Cc1ccc(C2(O)CCN(CCCC(=O)c3ccc(F)cc3)CC2)cc1	321510	nan	321510
D02624	Eszopiclone (JAN/USP/INN); Estorra (TN); Lunesta (TN)	CN1CCN(C(=O)OC2c3nccnc3C(=O)N2c2ccc(Cl)cn2)CC1	768704, 7726624	nan	7726624, 768704
D02625	Trifluperidol (USAN/INN); Triperidol (TN)	O=C(CCCN1CCC(O)(c2cccc(C(F)(F)F)c2)CC1)c1ccc(F)cc1	1556208	nan	1556208
D02627	Benperidol (USAN/INN); Anquil (TN)	O=C(CCCN1CCC(n2c(=O)[nH]c3ccccc32)CC1)c1ccc(F)cc1	900981	nan	900981
D02628	Milenperone (USAN/INN)	O=C(c1ccc(F)cc1)C1CCN(CCCn2c(=O)[nH]c3cc(Cl)ccc32)CC1	901964	nan	901964
D02629	Fluspirilene (USAN/INN); Imap (TN)	O=C1NCN(c2ccccc2)C12CCN(CCCC(c1ccc(F)cc1)c1ccc(F)cc1)CC2	633853	nan	633853
D02630	Penfluridol (USAN/INN); Semap (TN)	OC1(c2ccc(Cl)c(C(F)(F)F)c2)CCN(CCCC(c2ccc(F)cc2)c2ccc(F)cc2)CC1	1558826	nan	1558826
D02634	Alentemol hydrobromide (USAN)	Br.CCCN(CCC)C1Cc2cccc3cc(O)cc(c23)C1	4607299	nan	4607299
D02638	Brofoxine (USAN/INN)	CC1(C)OC(=O)Nc2ccc(Br)cc21	644652	nan	644652
D02639	Buramate (USAN)	O=C(NCc1ccccc1)OCCO	2838813	nan	2838813
D02640	Indiplon (USAN/INN)	CC(=O)N(C)c1cccc(-c2ccnc3c(C(=O)c4cccs4)cnn23)c1	9940455	nan	9940455
D02642	Butaperazine (USAN)	CCCC(=O)c1ccc2c(c1)N(CCCN1CCN(C)CC1)c1ccccc1S2	900616	nan	900616
D02647	Cintriamide (USAN); Cintramide (INN)	COc1cc(C=CC(N)=O)cc(OC)c1OC	2381737	nan	2381737
D02649	Clopimozide (USAN/INN)	O=c1[nH]c2cc(Cl)ccc2n1C1CCN(CCCC(c2ccc(F)cc2)c2ccc(F)cc2)CC1	904611	nan	904611
D02651	Cloroperone hydrochloride (USAN)	Cl.O=C(CCCN1CCC(C(=O)c2ccc(Cl)cc2)CC1)c1ccc(F)cc1	13285582	nan	13285582
D02654	Cyproximide (USAN)	O=C1NC(=O)C2(c3ccc(Cl)cc3)CC12	5269955	nan	5269955
D02658	Flucindole (USAN/INN)	CN(C)C1CCc2[nH]c3c(F)cc(F)cc3c2C1	409690	nan	409690
D02659	Flumezapine (USAN)	Cc1cc2c(s1)Nc1ccc(F)cc1N=C2N1CCN(C)CC1	1033583	nan	1033583
D02662	Flutroline (USAN/INN)	OC(CCCN1CCc2c(c3cc(F)ccc3n2-c2ccc(F)cc2)C1)c1ccc(F)cc1	947705	nan	947705
D02666	Iloperidone (USAN/INN); Fanapt (TN)	COc1cc(C(C)=O)ccc1OCCCN1CCC(c2noc3cc(F)ccc23)CC1	7233425	nan	7233425
D02668	Lenperone (USAN)	O=C(CCCN1CCC(C(=O)c2ccc(F)cc2)CC1)c1ccc(F)cc1	1554429	nan	1554429
D02671	Mesoridazine (USAN/INN); Lidanar (TN)	CN1CCCCC1CCN1c2ccccc2Sc2ccc(S(C)=O)cc21	1033986	C07143	1033986
D02672	Metiapine (USAN/INN)	Cc1ccc2c(c1)C(N1CCN(C)CC1)=Nc1ccccc1S2	833849	nan	833849
D02675	Ocaperidone (USAN)	Cc1nc2c(C)cccn2c(=O)c1CCN1CCC(c2noc3cc(F)ccc23)CC1	8654561	nan	8654561
D02682	Remoxipride (USAN)	CCN1CCCC1CNC(=O)c1c(OC)ccc(Br)c1OC	5287876	nan	5287876
D02686	Setoperone (USAN/INN)	Cc1nc2n(c(=O)c1CCN1CCC(C(=O)c3ccc(F)cc3)CC1)CCS2	6666291	nan	6666291
D02688	Tiospirone hydrochloride (USAN)	Cl.O=C1CC2(CCCC2)CC(=O)N1CCCCN1CCN(c2nsc3ccccc23)CC1	4835243	nan	4835243
D02689	Ramelteon (JAN/USAN/INN); Rozerem (TN)	CCC(=O)NCCC1CCc2ccc3c(c21)CCO3	9277587	nan	9277587
D02693	Devazepide (USAN/INN); L 364718	CN1C(=O)C(NC(=O)c2cc3ccccc3[nH]2)N=C(c2ccccc2)c2ccccc21	6577408	nan	6577408
D02694	Tifluadom (INN)	CN1c2ccccc2C(c2ccccc2F)=NCC1CNC(=O)c1ccsc1	nan	C11797	C11797
D02696	Talampanel (INN)	CC(=O)N1N=C(c2ccc(N)cc2)c2cc3c(cc2CC1C)OCO3	7341512, 7341511, 8506310	nan	7341512, 7341511, 8506310
D02701	Talniflumate (USAN/INN); Somalgen (TN)	O=C1OC(OC(=O)c2cccnc2Nc2cccc(C(F)(F)F)c2)c2ccccc21	503261	nan	503261
D02709	Valdecoxib (USAN/INN); Bextra (TN)	Cc1onc(-c2ccccc2)c1-c1ccc(S(N)(=O)=O)cc1	8563786	C21552	8563786
D02716	Pregabalin (JAN/USAN/INN); Lyrica (TN)	CC(C)CC(CN)CC(=O)O	4739508	nan	4739508
D02717	Valnoctamide (USAN/INN); Axiquel (TN)	CCC(C)C(CC)C(N)=O	1749434	nan	1749434
D02718	Valrocemide (USAN/INN); Valproyl glycinamide	CCCC(CCC)C(=O)NCC(N)=O	8484912	nan	8484912
D02719	Rosaprostol (INN)	CCCCCCC1CCC(O)C1CCCCCCC(=O)O	2117700	nan	2117700
D02729	Itopride hydrochloride (JAN); Ganaton (TN)	COc1ccc(C(=O)NCc2ccc(OCCN(C)C)cc2)cc1OC.Cl	5369226	nan	5369226
D02733	Trimethobenzamide hydrochloride (USP); Tigan (TN)	COc1cc(C(=O)NCc2ccc(OCCN(C)C)cc2)cc(OC)c1OC.Cl	3813405	nan	3813405
D02739	Ablukast (USAN/INN)	CCCc1c(OCCCCCOc2cc3c(cc2C(C)=O)CCC(C(=O)O)O3)ccc(C(C)=O)c1O	5464961	nan	5464961
D02741	Ablukast sodium (USAN); Ulpax (TN)	CCCc1c(OCCCCCOc2cc3c(cc2C(C)=O)CCC(C(=O)[O-])O3)ccc(C(C)=O)c1O.[Na+]	5846075	nan	5846075
D02750	Aceclidine (USAN/INN); Glaucostat (TN)	CC(=O)OC1CN2CCC1CC2	5104	nan	5104
D02751	Acedapsone (USAN/INN); Hansolar (TN)	CC(=O)Nc1ccc(S(=O)(=O)c2ccc(NC(C)=O)cc2)cc1	2164071	nan	2164071
D02753	Acifran (USAN/INN); Reductol (TN)	CC1(c2ccccc2)OC(C(=O)O)=CC1=O	6480068, 6480070, 6480069	nan	6480068, 6480070, 6480069
D02755	Acivicin (USAN/INN)	NC(C(=O)O)C1CC(Cl)=NO1	1074648	nan	1074648
D02766	Valpromide (INN); Depamide (TN)	CCCC(CCC)C(N)=O	1750444	nan	1750444
D02768	Adefovir (USAN/INN)	Nc1ncnc2c1ncn2CCOCP(=O)(O)O	3561094	C11277	3561094
D02769	Adenosine phosphate (USAN/INN); Adenyl (TN)	Nc1ncnc2c1ncn2C1OC(COP(=O)(O)O)C(O)C1O	1229792	nan	1229792
D02770	Adinazolam (USAN/INN)	CN(C)Cc1nnc2n1-c1ccc(Cl)cc1C(c1ccccc1)=NC2	577108	nan	577108
D02771	Adinazolam mesylate (USAN)	CN(C)Cc1nnc2n1-c1ccc(Cl)cc1C(c1ccccc1)=NC2.CS(=O)(=O)O	7405528	nan	7405528
D02774	Adrenalone (USAN/INN)	CNCC(=O)c1ccc(O)c(O)c1	2366101	nan	2366101
D02785	Aklomide (USAN/INN)	NC(=O)c1ccc([N+](=O)[O-])cc1Cl	1966537	nan	1966537
D02787	Alaproclate (USAN/INN)	CC(N)C(=O)OC(C)(C)Cc1ccc(Cl)cc1	2273647, 7123292, 7123293	nan	2273647, 7123293, 7123292
D02797	Albutoin (USAN/INN); Euprax (TN)	C=CCN1C(=O)C(CC(C)C)NC1=S	163719	nan	163719
D02804	Alexidine (USAN/INN)	CCCCC(CC)CNC(=N)NC(=N)NCCCCCCNC(=N)NC(=N)NCC(CC)CCCC	2404807	nan	2404807
D02813	Alipamide (USAN/INN)	CN(C)NC(=O)c1ccc(Cl)c(S(N)(=O)=O)c1	2871536	nan	2871536
D02815	Alitretinoin (USAN); Panretin (TN)	CC(C=CC1=C(C)CCCC1(C)C)=CC=CC(C)=CC(=O)O	2508066	nan	2508066
D02817	Allobarbital (USAN/INN)	C=CCC1(CC=C)C(=O)NC(=O)NC1=O	169139	nan	169139
D02824	Almotriptan (USAN)	CN(C)CCc1c[nH]c2ccc(CS(=O)(=O)N3CCCC3)cc12	8789271	nan	8789271
D02825	Almotriptan malate (USP); Axert (TN)	CN(C)CCc1c[nH]c2ccc(CS(=O)(=O)N3CCCC3)cc12.O=C(O)CC(O)C(=O)O	15435698	nan	15435698
D02828	Alonimid (USAN/INN)	O=C1CCC2(CCC(=O)c3ccccc32)C(=O)N1	21748	nan	21748
D02829	Alosetron hydrochloride (USAN); Lotrpnex (TN)	Cc1[nH]cnc1CN1CCc2c(c3ccccc3n2C)C1=O.Cl	8455746, 22681717	nan	8455746, 22681717
D02833	Alpidem (USAN/INN)	CCCN(CCC)C(=O)Cc1c(-c2ccc(Cl)cc2)nc2ccc(Cl)cn12	6347150	nan	6347150
D02841	Altretamine (USP/INN); Hexalen (TN)	CN(C)c1nc(N(C)C)nc(N(C)C)n1	195058	nan	195058
D02847	Ontazolast (USAN/INN)	Cc1ccc2oc(NC(CC3CCCCC3)c3ccccn3)nc2c1	6851005	nan	6851005
D02849	Ritolukast (USAN/INN)	O=S(=O)(Nc1cccc(OCc2ccc3ccccc3n2)c1)C(F)(F)F	6576632	nan	6576632
D02851	Tomelukast (USAN/INN)	CCCc1c(OCCCCc2nnn[nH]2)ccc(C(C)=O)c1O	4238438	nan	4238438
D02862	Aluminum phosphate (USP); Phosphaljel (TN)	O=P([O-])([O-])[O-].[AlH3+3]	11343339, 16486896, 17419255, 16097227, 16532894, 27508601, 27508602, 16511773, 16635777, 16185263, 17731628, 16600898, 16534107, 16532789, 17185851, 16532878, 16087463, 18163897, 16481085, 29327643	nan	18163897, 16097227, 16185263, 16087463, 16532878, 16511773, 29327643, 16486896, 17731628, 16635777, 16600898, 11343339, 16532894, 16481085, 16534107, 17419255, 17185851, 27508601, 16532789, 27508602
D02877	Alverine citrate (USAN)	CCN(CCCc1ccccc1)CCCc1ccccc1.O=C(O)CC(O)(CC(=O)O)C(=O)O	3851428	nan	3851428
D02885	Ambuside (USAN/INN)	C=CCNS(=O)(=O)c1cc(S(N)(=O)=O)c(Cl)cc1N=CC=C(C)O	19244325	nan	19244325
D02890	Amdoxovir (USAN/INN)	Nc1nc(N)c2ncn(C3COC(CO)O3)c2n1	14540827	nan	14540827
D02892	Ameltolide (USAN/INN)	Cc1cccc(C)c1NC(=O)c1ccc(N)cc1	2734562	C11485	2734562
D02896	Amflutizole (USAN/INN)	Nc1c(-c2cccc(C(F)(F)F)c2)nsc1C(=O)O	13333602	nan	13333602
D02900	Amidapsone (USAN/INN)	NC(=O)Nc1ccc(S(=O)(=O)c2ccc(N)cc2)cc1	2991269	nan	2991269
D02902	Amifloxacin (USAN/INN)	CNn1cc(C(=O)O)c(=O)c2cc(F)c(N3CCN(C)CC3)cc21	4205905	nan	4205905
D02904	Amiloxate (USP/INN); Neo Heliopan (TN)	COc1ccc(C=CC(=O)OCCC(C)C)cc1	8141583	nan	8141583
D02905	Aminacrine hydrochloride (USAN); Aminoacridine hydrochloride; Monacrin (TN)	Cl.Nc1c2ccccc2nc2ccccc12	4274034	nan	4274034
D02906	Aminobenzoate potassium (USP); Potaba (TN)	Nc1ccc(C(=O)[O-])cc1.[K+]	4028959	nan	4028959
D02907	Aminobenzoate sodium (USP); Sodium aminobenzoate	Nc1ccc(C(=O)[O-])cc1.[Na+]	4163974	nan	4163974
D02908	Aminolevulinic acid hydrochloride (JAN/USAN); 5-Aminolevulinic acid hydrochloride; Levulan (TN); Ameluz (TN); Gleolan (TN)	Cl.NCC(=O)CCC(=O)O	3690651, 30609621	nan	3690651, 30609621
D02909	Aminorex (USAN/INN); Apiquel (TN)	NC1=NCC(c2ccccc2)O1	608682	nan	608682
D02910	Amiodarone (USAN/INN)	CCCCc1oc2ccccc2c1C(=O)c1cc(I)c(OCCN(CC)CC)c(I)c1	1271711	C06823	1271711
D02920	Ammonium lactate (USAN); Lactic acid ammonium salt (INN); Lac-Hydrin (TN)	CC(O)C(=O)[O-].[NH4+]	13648497	nan	13648497
D02922	Amodiaquine (USP/INN)	CCN(CC)Cc1cc(Nc2ccnc3cc(Cl)ccc23)ccc1O	300962	C07626	300962
D02923	Amorolfine (USAN/INN); Loceryl (TN)	CCC(C)(C)c1ccc(CC(C)CN2CC(C)OC(C)C2)cc1	10558240, 8870846	nan	10558240, 8870846
D02924	Amotosalen hydrochloride (USAN)	Cc1oc2c(C)c3oc(=O)cc(C)c3cc2c1COCCN.Cl	14677364	nan	14677364
D02931	Amylene hydrate (NF)	CCC(C)(C)O	1361351	C21401	1361351
D02933	Anagrelide hydrochloride (USP); Agrylin (TN); Xagrid (TN)	Cl.O=C1CN2Cc3c(ccc(Cl)c3Cl)N=C2N1	4614131	nan	4614131
D02941	Anileridine (USP/INN)	CCOC(=O)C1(c2ccccc2)CCN(CCc2ccc(N)cc2)CC1	331255	nan	331255
D02944	Anirolac (USAN/INN)	COc1ccc(C(=O)c2ccc3n2CCC3C(=O)O)cc1	428008	nan	428008
D02948	Anitrazafen (USAN/INN)	COc1ccc(-c2nnc(C)nc2-c2ccc(OC)cc2)cc1	890723	nan	890723
D02950	Antazoline phosphate (USP)	O=P(O)(O)O.c1ccc(CN(CC2=NCCN2)c2ccccc2)cc1	10309085	nan	10309085
D02951	Anthelmycin (USAN); Antelmycin (INN)	Nc1ccn(C2OC(C(OC3OC(CO)C(O)C(N)C3O)C(O)C(O)C(O)C(O)CO)C(N)C(O)C2O)c(=O)n1	nan	C22192	C22192
D02959	Antimony potassium tartrate (USP)	O.O.O.O=C([O-])C1O[Sb]2OC(=O)C(O2)C(C(=O)[O-])O[Sb]2OC(=O)C1O2.[K+].[K+]	nan	C11340	C11340
D02964	Apaxifylline (USAN/INN)	CCCn1c(=O)c2[nH]c(C3CCC(=O)C3)nc2n(CCC)c1=O	5830093	nan	5830093
D02966	Apazone (USAN); Azapropazone (INN); Prolixan (TN)	CCCC1C(=O)N2C(N(C)C)=Nc3ccc(C)cc3N2C1=O	623763	nan	623763
D02976	Arbutamine hydrochloride (USAN); Genesa (TN)	Cl.Oc1ccc(CCCCNCC(O)c2ccc(O)c(O)c2)cc1	13250661	nan	13250661
D02982	Arginine (USP/INN); L-Arginine (JP17)	N=C(N)NCCCC(N)C(=O)O	1725411, 6123731, 5734098, 5734097	C02385	1725411, 5734097, 6123731, 5734098
D02984	Arildone (USAN)	CCC(=O)C(CCCCCCOc1ccc(OC)cc1Cl)C(=O)CC	2009916	nan	2009916
D02987	Arprinocid (USAN/INN); Arpocox (TN)	Nc1ncnc2c1ncn2Cc1c(F)cccc1Cl	827813	nan	827813
D02988	Arsanilic acid (USP/INN)	Nc1ccc([As](=O)(O)O)cc1	1102334	nan	1102334
D02993	Arzoxifene hydrochloride (USAN)	COc1ccc(-c2sc3cc(O)ccc3c2Oc2ccc(OCCN3CCCCC3)cc2)cc1.Cl	8377634	nan	8377634
D02995	Asenapine maleate (JAN/USAN); Saphris (TN)	CN1CC2c3ccccc3Oc3ccc(Cl)cc3C2C1.O=C(O)C=CC(=O)O	23821869	nan	23821869
D03010	Atreleuton (USAN/INN)	CC(C#Cc1ccc(Cc2ccc(F)cc2)s1)N(O)C(N)=O	7467607	nan	7467607
D03012	Avasimibe (USAN/INN)	CC(C)c1cc(C(C)C)c(CC(=O)NS(=O)(=O)Oc2c(C(C)C)cccc2C(C)C)c(C(C)C)c1	7608606	nan	7608606
D03015	Avobenzone (USP/INN)	COc1ccc(C(=O)CC(=O)c2ccc(C(C)(C)C)cc2)cc1	7999401	nan	7999401
D03017	Avridine (USAN)	CCCCCCCCCCCCCCCCCCN(CCCCCCCCCCCCCCCCCC)CCCN(CCO)CCO	2227682	nan	2227682
D03018	Axitirome (USAN/INN)	CCOC(=O)C(=O)Nc1cc(C)c(Oc2ccc(O)c(C(O)c3ccc(F)cc3)c2)c(C)c1	7259724	nan	7259724
D03023	Azaconazole (USAN/INN)	Clc1ccc(C2(Cn3cncn3)OCCO2)c(Cl)c1	822252	C18701	822252
D03028	Azanidazole (USAN/INN)	Cn1c([N+](=O)[O-])cnc1C=Cc1ccnc(N)n1	4495385	nan	4495385
D03030	Azarole (USAN)	C1=CC(=Nn2cccc2)C=CC1=Nn1cccc1	5272844, 5272843	nan	5272843, 5272844
D03034	Azelaic acid (USAN/INN); Azelex (TN); Finacea (TN)	O=C(O)CCCCCCCC(=O)O	1101094	C08261	1101094
D03035	Azepindole (USAN/INN)	c1ccc2c(c1)cc1n2CCCNC1	911027	nan	911027
D03040	Azolimine (USAN/INN)	CN1C(=N)N(c2ccccc2)CC1=O	882405	nan	882405
D03052	Bamnidazole (USAN/INN)	Cc1ncc([N+](=O)[O-])n1CCOC(N)=O	539017	nan	539017
D03060	Batanopride hydrochloride (USAN)	CCN(CC)CCNC(=O)c1cc(Cl)c(N)cc1OC(C)C(C)=O.Cl	5841285	nan	5841285
D03062	Bazedoxifene acetate (JAN/USAN); Viviant (TN)	CC(=O)O.Cc1c(-c2ccc(O)cc2)n(Cc2ccc(OCCN3CCCCCC3)cc2)c2ccc(O)cc12	10510865	nan	10510865
D03067	Belfosdil (USAN/INN)	CCCCOP(=O)(CC(CCOc1ccccc1)CP(=O)(OCCCC)OCCCC)OCCCC	13853514	nan	13853514
D03072	Bemarinone hydrochloride (USAN)	COc1ccc2[nH]c(=O)nc(C)c2c1OC.Cl	5462904	nan	5462904
D03074	Bemitradine (USAN/INN)	CCOCCc1c(-c2ccccc2)nc(N)n2ncnc12	13391371	nan	13391371
D03075	Bemoradan (USAN/INN)	CC1CC(=O)NN=C1c1ccc2c(c1)OCC(=O)N2	3559160	nan	3559160
D03080	Benoxaprofen (USAN/INN); Oraflex (TN)	CC(C(=O)O)c1ccc2oc(-c3ccc(Cl)cc3)nc2c1	1085080	nan	1085080
D03082	Benserazide (USAN/INN)	NC(CO)C(=O)NNCc1ccc(O)c(O)c1O	3984490	nan	3984490
D03083	Bentazepam (USAN/INN)	O=C1CN=C(c2ccccc2)c2c(sc3c2CCCC3)N1	1083088	nan	1083088
D03086	Benurestat (USAN/INN)	O=C(CNC(=O)c1ccc(Cl)cc1)NO	2277707	nan	2277707
D03087	Benzetimide hydrochloride (USAN); Dioxatrine (TN)	Cl.O=C1CCC(c2ccccc2)(C2CCN(Cc3ccccc3)CC2)C(=O)N1	6461532	nan	6461532
D03089	Benzoctamine hydrochloride (USAN)	CNCC12CCC(c3ccccc31)c1ccccc12.Cl	6248577	nan	6248577
D03090	Benzodepa (USAN/INN)	O=C(NP(=O)(N1CC1)N1CC1)OCc1ccccc1	290300	nan	290300
D03092	Benzoxiquine (USAN/INN); Dioxyline (TN)	O=C(Oc1cccc2cccnc12)c1ccccc1	191186	nan	191186
D03093	Benzoyl peroxide (JAN/USP); Bepio (TN)	O=C(OOC(=O)c1ccccc1)c1ccccc1	984320	C19346	984320
D03099	Besipirdine hydrochloride (USAN)	CCCN(c1ccncc1)n1ccc2ccccc21.Cl	8164576	nan	8164576
D03100	Besonprodil (USAN)	O=c1[nH]c2ccc(S(=O)CCN3CCC(Cc4ccc(F)cc4)CC3)cc2o1	10296267	nan	10296267
D03101	beta Carotene (USP); Betacarotene (INN); Solatene (TN)	CC(C=CC=C(C)C=CC1=C(C)CCCC1(C)C)=CC=CC=C(C)C=CC=C(C)C=CC1=C(C)CCCC1(C)C	1917413	nan	1917413
D03103	Betaine hydrochloride (USP); Cystdane (TN)	C[N+](C)(C)CC(=O)O.[Cl-]	3916181	nan	3916181
D03105	Betiatide (USAN)	O=C(O)CNC(=O)CNC(=O)CNC(=O)CSC(=O)c1ccccc1	9289082	nan	9289082
D03106	Bexarotene (JAN/USAN/INN); Targretin (TN)	C=C(c1ccc(C(=O)O)cc1)c1cc2c(cc1C)C(C)(C)CCC2(C)C	7041961	nan	7041961
D03107	Bexlosteride (USAN/INN)	CN1C(=O)CCC2c3ccc(Cl)cc3CCC21	7570415	nan	7570415
D03110	Bicifadine hydrochloride (USAN)	Cc1ccc(C23CNCC2C3)cc1.Cl	11333387, 5309386	nan	5309386, 11333387
D03112	Biclodil hydrochloride (USAN)	Cl.N=C(NC(N)=O)Nc1c(Cl)cccc1Cl	6453938	nan	6453938
D03113	Bidisomide (USAN/INN)	CC(=O)N(CCC(CCN1CCCCC1)(C(N)=O)c1ccccc1Cl)C(C)C	6536016	nan	6536016
D03116	Bindarit (USAN/INN)	CC(C)(OCc1nn(Cc2ccccc2)c2ccccc12)C(=O)O	14755397	nan	14755397
D03118	Binfloxacin (USAN/INN)	CCn1cc(C(=O)O)c(=O)c2cc(F)c(N3CCN4CCC3CC4)cc21	4911514	nan	4911514
D03148	Bornelone (USAN/INN)	CC(=O)C=CC=C1C2CCC(C2)C1(C)C	1953558	nan	1953558
D03150	Bortezomib (JAN/USAN/INN); Velcade (TN)	CC(C)CC(NC(=O)C(Cc1ccccc1)NC(=O)c1cnccn1)B(O)O	23876496	nan	23876496
D03154	Brequinar sodium (USAN)	Cc1c(-c2ccc(-c3ccccc3F)cc2)nc2ccc(F)cc2c1C(=O)[O-].[Na+]	6466194	nan	6466194
D03158	Brocresine (USAN/INN)	NOCc1ccc(Br)c(O)c1	1945736	nan	1945736
D03159	Brocrinat (USAN/INN)	O=C(O)COc1ccc2c(-c3ccccc3F)noc2c1Br	5615916	nan	5615916
D03161	Bromchlorenone (USAN/INN)	O=c1[nH]c2cc(Cl)c(Br)cc2o1	645274	nan	645274
D03164	Bromindione (USAN/INN)	O=C1c2ccccc2C(=O)C1c1ccc(Br)cc1	1878512	nan	1878512
D03170	Bucindolol hydrochloride (USAN)	CC(C)(Cc1c[nH]c2ccccc12)NCC(O)COc1ccccc1C#N.Cl	20096518	nan	20096518
D03172	Bucrylate (USAN); Bucrilate (INN)	C=C(C#N)C(=O)OCC(C)C	1766805	nan	1766805
D03174	Bumetrizole (USAN/INN)	Cc1cc(-n2nc3ccc(Cl)cc3n2)c(O)c(C(C)(C)C)c1	623910	nan	623910
D03176	Bunaprolast (USAN/INN)	CCCCc1cc(OC)c2ccccc2c1OC(C)=O	3553472	nan	3553472
D03177	Bunolol hydrochloride (USAN)	CC(C)(C)NCC(O)COc1cccc2c1CCCC2=O.Cl	6579687	nan	6579687
D03178	Bupicomide (USAN/INN)	CCCCc1ccc(C(N)=O)nc1	125806	nan	125806
D03180	Butabarbital (USP); Secbutabarbital (BAN)	CCC(C)C1(CC)C(=O)NC(=O)NC1=O	199127	C07827	199127
D03181	Butacetin (USAN)	CC(=O)Nc1ccc(OC(C)(C)C)cc1	2415422	nan	2415422
D03182	Butalbital (USP/INN); Sandoptal (TN)	C=CCC1(CC(C)C)C(=O)NC(=O)NC1=O	202119	nan	202119
D03189	Buthiazide (USAN); Butizide (INN)	CC(C)CC1Nc2cc(Cl)c(S(N)(=O)=O)cc2S(=O)(=O)N1	6576368, 6576369, 629245	nan	6576369, 6576368, 629245
D03191	Butilfenin (USAN/INN)	CCCCc1ccc(NC(=O)CN(CC(=O)O)CC(=O)O)cc1	5101196	nan	5101196
D03194	Butonate (USAN/INN)	CCCC(=O)OC(C(Cl)(Cl)Cl)P(=O)(OC)OC	1813429	C18967	1813429
D03195	Butopamine (USAN/INN)	CC(CCc1ccc(O)cc1)NCC(O)c1ccc(O)cc1	2756690	nan	2756690
D03206	Alagebrium chloride (USAN)	Cc1sc[n+](CC(=O)c2ccccc2)c1C.[Cl-]	11745839	nan	11745839
D03213	Apixaban (JAN/USAN/INN); Eliquis (TN)	COc1ccc(-n2nc(C(N)=O)c3c2C(=O)N(c2ccc(N4CCCCC4=O)cc2)CC3)cc1	11244786	nan	11244786
D03215	Armodafinil (USAN/INN); Nuvigil (TN)	NC(=O)CS(=O)C(c1ccccc1)c1ccccc1	10016759, 11334026, 10018841, 1978970	nan	10016759, 10018841, 11334026, 1978970
D03218	Axitinib (JAN/USAN); Inlyta (TN)	CNC(=O)c1ccccc1Sc1ccc2c(C=Cc3ccccn3)n[nH]c2c1	14436737	nan	14436737
D03221	Befetupitant (USAN/INN)	Cc1ccccc1-c1cc(N2CCOCC2)ncc1N(C)C(=O)C(C)(C)c1cc(C(F)(F)F)cc(C(F)(F)F)c1	10313883	nan	10313883
D03227	Bemotrizinol (USAN/INN); Tinosorb S (TN)	CCCCC(CC)COc1ccc(-c2nc(-c3ccc(OC)cc3)nc(-c3ccc(OCC(CC)CCCC)cc3O)n2)c(O)c1	11322254	nan	11322254
D03241	Nitecapone (INN)	CC(=O)C(=Cc1cc(O)c(O)c([N+](=O)[O-])c1)C(C)=O	6420063	nan	6420063
D03248	Clorgiline (INN); Clorgyline	C#CCN(C)CCCOc1ccc(Cl)cc1Cl	1976758	C11685	1976758
D03249	Bisoctrizole (USP/INN)	CC(C)(C)CC(C)(C)c1cc(Cc2cc(C(C)(C)CC(C)(C)C)cc(-n3nc4ccccc4n3)c2O)c(O)c(-n2nc3ccccc3n2)c1	11326835	nan	11326835
D03252	Bosutinib (USAN)	COc1cc(Nc2c(C#N)cnc3cc(OCCCN4CCN(C)CC4)c(OC)cc23)c(Cl)cc1Cl	9100307	nan	9100307
D03273	Carnitine chloride (JAN); dl-Carnitine hydrochloride; Entomin (TN)	C[N+](C)(C)CC(O)CC(=O)O.[Cl-]	4163212, 4848049, 4848048	nan	4848049, 4848048, 4163212
D03277	Thiamine mononitrate (USP); Thiamine nitrate (JP17); Vitanon (TN)	Cc1ncc(C[n+]2csc(CCO)c2C)c(N)n1.O=[N+]([O-])[O-]	3857790	nan	3857790
D03286	Prosultiamine (JAN/INN); Alinamin (TN)	CCCSSC(CCO)=C(C)N(C=O)Cc1cnc(C)nc1N	8132324	nan	8132324
D03288	Calcium carbimide (INN)	N#C[N-2].[Ca+2]	nan	C19113	C19113
D03302	Dibasic calcium phosphate, anhydrous (JAN); Calcium phosphate, dibasic; CalStar (TN)	O=P([O-])([O-])O.[Ca+2]	26609593, 11322552, 16801580, 27155991, 23111463, 15522601, 16633057, 11327507, 17000262	nan	11327507, 15522601, 17000262, 23111463, 16633057, 16801580, 27155991, 11322552, 26609593
D03308	Iobenguane I 131 (USP); 3-Iodobenzylguanidine (131I) (JAN); 131I-m-Iodobenzylguanidine; Azedra (TN); PheoMIBG-I 131 (TN)	N=C(N)NCc1cccc(I)c1	4988775	nan	4988775
D03365	Nicotine (USP); Habitrol (TN)	CN1CCCC1c1cccnc1	82108	C16150	82108
D03369	Capobenic acid (USAN/INN)	COc1cc(C(=O)NCCCCCC(=O)O)cc(OC)c1OC	2173387	nan	2173387
D03371	Capravirine (USAN/INN)	CC(C)c1nc(COC(N)=O)n(Cc2ccncc2)c1Sc1cc(Cl)cc(Cl)c1	8165655	nan	8165655
D03376	Captamine hydrochloride (USAN)	CN(C)CCS.Cl	3906670, 24642433	nan	3906670, 24642433
D03377	Capuride (USAN/INN); Pacinox (TN)	CCC(C)C(CC)C(=O)NC(N)=O	1780788	nan	1780788
D03378	Caracemide (USAN)	CNC(=O)ON(C(C)=O)C(=O)NC	5935912	nan	5935912
D03382	Carbadox (USAN); Mecadox (TN)	COC(=O)NN=Cc1c[n+]([O-])c2ccccc2[n+]1[O-]	893842	nan	893842
D03383	Carbamide peroxide (USP); Murine ear drops (TN)	NC(N)=O.OO	3680705, 3680414	nan	3680414, 3680705
D03386	Carbazeran (USAN/INN)	CCNC(=O)OC1CCN(c2nncc3cc(OC)c(OC)cc23)CC1	713101	nan	713101
D03390	Carbocloral (USAN/INN)	CCOC(=O)NC(O)C(Cl)(Cl)Cl	1812588	nan	1812588
D03406	Cariporide mesylate (USAN)	CC(C)c1ccc(C(=O)N=C(N)N)cc1S(C)(=O)=O.CS(=O)(=O)O	7964012	nan	7964012
D03410	Carprofen (USP/INN); Rimadyl (TN)	CC(C(=O)O)c1ccc2c(c1)[nH]c1ccc(Cl)cc12	487098	C18364	487098
D03413	Cartazolate (USAN/INN)	CCCCNc1c(C(=O)OCC)cnc2c1cnn2CC	619815	nan	619815
D03419	Cedefingol (USAN/INN)	CCCCCCCCCCCCCCCC(O)C(CO)NC(C)=O	1797979	nan	1797979
D03424	Cefetamet (USAN/INN); CEMT	CON=C(C(=O)NC1C(=O)N2C(C(=O)O)=C(C)CSC12)c1csc(N)n1	1094658	nan	1094658
D03447	Cetaben sodium (USAN)	CCCCCCCCCCCCCCCCNc1ccc(C(=O)[O-])cc1.[Na+]	5688441	nan	5688441
D03448	Cetalkonium chloride (USAN/INN); Zettyn (TN)	CCCCCCCCCCCCCCCC[N+](C)(C)Cc1ccccc1.[Cl-]	3802341	nan	3802341
D03454	Cetrimonium bromide (NF/INN)	CCCCCCCCCCCCCCCC[N+](C)(C)C.[Br-]	3598189, 18887831, 19244026, 23111769	C11275	18887831, 23111769, 19244026, 3598189
D03459	Chloral betaine (USAN/INN)	C[N+](C)(C)CC(=O)[O-].OC(O)C(Cl)(Cl)Cl	6882150	nan	6882150
D03460	Mecrylate (USAN); Mecrilate (INN); Cyanoacrylate (JAN); Aron alpha A (TN)	C=C(C#N)C(=O)OC	1751282	nan	1751282
D03464	Chlorindanol (USAN/INN)	Oc1ccc(Cl)c2c1CCC2	1945696	nan	1945696
D03465	Chlormerodrin Hg 197 (USAN); Chlormerodrin (197Hg) (INN); Chlormerodrin Hg 197 (TN)	COC(CNC(N)=O)C[Hg]Cl	3735455	nan	3735455
D03466	Chlormerodrin Hg 203 (USAN); Neohydrin-203 (TN)	COC(CNC(N)=O)C[Hg]Cl	3735455	nan	3735455
D03468	Chlorocresol (NF/INN)	Cc1cc(O)ccc1Cl	1237629	C14331	1237629
D03470	Phtharal (JAN); o-Phthalaldehyde; Disopa (TN)	O=Cc1ccccc1C=O	878317	nan	878317
D03471	Chlorothiazide sodium (USP); Diuril (TN)	NS(=O)(=O)c1cc2c(cc1Cl)N=C[N-]S2(=O)=O.[Na+]	21899391	nan	21899391
D03472	Chloroxine (USAN); Capitrol (TN)	Oc1c(Cl)cc(Cl)c2cccnc12	153606	nan	153606
D03473	Chloroxylenol (USP/INN)	Cc1cc(O)cc(C)c1Cl	1862539	C14715	1862539
D03476	Chlorphentermine hydrochloride (USAN); Pre-sate (TN)	CC(C)(N)Cc1ccc(Cl)cc1.Cl	3693465	nan	3693465
D03480	Chromic chloride Cr 51 (USAN)	Cl[Cr](Cl)Cl	16482113, 17043874, 16476189, 3903065	nan	3903065, 17043874, 16482113, 16476189
D03481	Chromic phosphate Cr 51 (USAN)	O=P([O-])([O-])[O-].[Cr+3]	17019779, 32008828, 16698617, 14661280, 16696669, 31708038	nan	14661280, 31708038, 16698617, 17019779, 32008828, 16696669
D03482	Chromic phosphate P 32 (USP); Phosphocol P32 (TN)	O=P([O-])([O-])[O-].[Cr+3]	17019779, 32008828, 16698617, 14661280, 16696669, 31708038	nan	14661280, 31708038, 16698617, 17019779, 32008828, 16696669
D03486	Ciclazindol (USAN/INN)	OC1(c2cccc(Cl)c2)C2=NCCCN2c2ccccc21	759259	nan	759259
D03487	Cicletanine (USAN/INN)	Cc1ncc2c(c1O)COC2c1ccc(Cl)cc1	5440957	nan	5440957
D03488	Ciclopirox (USP/INN); Loprox (TN); Penlac (TN)	Cc1cc(C2CCCCC2)n(O)c(=O)c1	1533423	nan	1533423
D03489	Cicloprofen (USAN/INN)	CC(C(=O)O)c1ccc2c(c1)Cc1ccccc1-2	2216258	nan	2216258
D03491	Cidoxepin hydrochloride (USAN)	CN(C)CCC=C1c2ccccc2COc2ccccc21.Cl	5463221	nan	5463221
D03492	Cifenline (USAN); Cibenzoline (INN)	c1ccc(C2(c3ccccc3)CC2C2=NCCN2)cc1	6515174	nan	6515174
D03493	Ciglitazone (USAN/INN)	CC1(COc2ccc(CC3SC(=O)NC3=O)cc2)CCCCC1	3623680	nan	3623680
D03495	Cilansetron (USAN/INN)	Cc1nccn1CC1CCc2c(c3cccc4c3n2CCC4)C1=O	6689725	nan	6689725
D03502	Cimaterol (USAN/INN)	CC(C)NCC(O)c1ccc(N)c(C#N)c1	2418129	nan	2418129
D03504	Cinacalcet (USAN)	CC(NCCCc1cccc(C(F)(F)F)c1)c1cccc2ccccc12	18336510	nan	18336510
D03505	Cinacalcet hydrochloride (JAN/USAN); Sensipar (TN); Mimpara (TN)	CC(NCCCc1cccc(C(F)(F)F)c1)c1cccc2ccccc12.Cl	31295262	nan	31295262
D03506	Cinanserin hydrochloride (USAN)	CN(C)CCCSc1ccccc1NC(=O)C=Cc1ccccc1.Cl	7106997	nan	7106997
D03513	Cinromide (USAN/INN)	CCNC(=O)C=Cc1cccc(Br)c1	4399072	nan	4399072
D03514	Cintazone (USAN); Cinnopentazone (INN)	CCCCCC1C(=O)N2C=C(c3ccccc3)c3ccccc3N2C1=O	766601	nan	766601
D03515	Cioteronel (USAN/INN)	CCC(CCCCC1CCC2CC(=O)CC12)OC	13478667	nan	13478667
D03516	Cipamfylline (USAN/INN)	Nc1nc2c([nH]1)c(=O)n(CC1CC1)c(=O)n2CC1CC1	6820786	nan	6820786
D03521	Ciprofibrate (USAN/INN)	CC(C)(Oc1ccc(C2CC2(Cl)Cl)cc1)C(=O)O	1984981, 7168062, 7168061	nan	1984981, 7168062, 7168061
D03523	Ciramadol (USAN/INN)	CN(C)C(c1cccc(O)c1)C1CCCCC1O	2810477	nan	2810477
D03527	Citenamide (USAN/INN)	NC(=O)C1c2ccccc2C=Cc2ccccc21	2331569	nan	2331569
D03532	Clazolimine (USAN/INN)	CN1C(=N)N(c2ccc(Cl)cc2)CC1=O	883881	nan	883881
D03533	Clazuril (USAN/INN)	N#CC(c1ccc(Cl)cc1)c1ccc(-n2ncc(=O)[nH]c2=O)cc1Cl	11732905	nan	11732905
D03534	Clebopride (USAN); Cleboril (TN)	COc1cc(N)c(Cl)cc1C(=O)NC1CCN(Cc2ccccc2)CC1	493934	nan	493934
D03535	Clemastine (USAN)	CN1CCCC1CCOC(C)(c1ccccc1)c1ccc(Cl)cc1	1393193, 6067713	nan	1393193, 6067713
D03538	Clioquinol (USP/INN)	Oc1c(I)cc(Cl)c2cccnc12	153637	nan	153637
D03539	Clioxanide (USAN/INN)	CC(=O)Oc1c(I)cc(I)cc1C(=O)Nc1ccc(Cl)cc1	2950514	nan	2950514
D03540	Cliprofen (USAN/INN)	CC(C(=O)O)c1ccc(C(=O)c2cccs2)c(Cl)c1	1388718	nan	1388718
D03542	Clodanolene (USAN/INN)	O=C1CN(N=Cc2ccc(-c3ccc(Cl)c(Cl)c3)o2)C(=O)N1	698280	nan	698280
D03545	Clodronic acid (USAN/INN)	O=P(O)(O)C(Cl)(Cl)P(=O)(O)O	1876367	nan	1876367
D03548	Cloflucarban (USAN); Halocarban (INN)	O=C(Nc1ccc(Cl)cc1)Nc1ccc(Cl)c(C(F)(F)F)c1	2774143	nan	2774143
D03552	Clominorex (USAN/INN)	NC1=NCC(c2ccc(Cl)cc2)O1	516450	nan	516450
D03553	Clonitrate (USAN/INN)	O=[N+]([O-])OCC(CCl)O[N+](=O)[O-]	1789107	nan	1789107
D03555	Clonixin (USAN/INN)	Cc1c(Cl)cccc1Nc1ncccc1C(=O)O	483212	nan	483212
D03556	Zuclopenthixol (INN); Clopixol (TN)	OCCN1CCN(CCC=C2c3ccccc3Sc3ccc(Cl)cc32)CC1	899403	nan	899403
D03557	Cloperastine (INN)	Clc1ccc(C(OCCN2CCCCC2)c2ccccc2)cc1	275589	nan	275589
D03559	Clopidol (USAN/INN)	Cc1nc(C)c(Cl)c(O)c1Cl	1527826	nan	1527826
D03562	Clorazepate monopotassium (USAN)	O=C([O-])C1N=C(c2ccccc2)c2cc(Cl)ccc2NC1=O.[K+]	697246	nan	697246
D03563	Clorethate (USAN/INN)	O=C(OCC(Cl)(Cl)Cl)OCC(Cl)(Cl)Cl	1912457	nan	1912457
D03564	Clorophene (USAN); Santophen 1 (TN)	Oc1ccc(Cl)cc1Cc1ccccc1	1959194	nan	1959194
D03565	Clorsulon (USP/INN); Curatrem (TN)	Nc1cc(C(Cl)=C(Cl)Cl)c(S(N)(=O)=O)cc1S(N)(=O)=O	2821757	nan	2821757
D03566	Clortermine hydrochloride (USAN); Voranil (TN)	CC(C)(N)Cc1ccccc1Cl.Cl	3698874	nan	3698874
D03567	Closantel (USAN/INN)	Cc1cc(C(C#N)c2ccc(Cl)cc2)c(Cl)cc1NC(=O)c1cc(I)cc(I)c1O	6249214	nan	6249214
D03569	Cloticasone propionate (USAN)	CCC(=O)OC1(C(=O)SCCl)C(C)CC2C3CC(F)C4=CC(=O)C=CC4(C)C3(F)C(O)CC21C	22488292	nan	22488292
D03572	Cloxyquin (USAN); Cloxiquine (INN)	Oc1ccc(Cl)c2cccnc12	5289	nan	5289
D03585	Colfosceril palmitate (USAN/INN)	CCCCCCCCCCCCCCCC(=O)OCC(COP(=O)([O-])OCC[N+](C)(C)C)OC(=O)CCCCCCCCCCCCCCC	4222118, 1917965, 5787774	nan	5787774, 1917965, 4222118
D03595	Cortodoxone (USAN)	CC12CCC(=O)C=C1CCC1C2CCC2(C)C1CCC2(O)C(=O)CO	2225857	nan	2225857
D03600	Creatinine (NF)	CN1CC(=O)NC1=N	112064	C00791	112064
D03601	Crilvastatin (USAN/INN)	CC1CC(OC(=O)C2CCC(=O)N2)CC(C)(C)C1	7709181	nan	7709181
D03610	Crufomate (USAN/INN)	CNP(=O)(OC)Oc1ccc(C(C)(C)C)cc1Cl	2133258	C18972	2133258
D03618	Cyclazocine (USAN/INN)	CC1C2Cc3ccc(O)cc3C1(C)CCN2CC1CC1	29501020	nan	29501020
D03619	Cyclindole (USAN); Ciclindole (INN)	CN(C)C1CCc2[nH]c3ccccc3c2C1	477821	nan	477821
D03621	Cyclizine (INN)	CN1CCN(C(c2ccccc2)c2ccccc2)CC1	230441	C06930	230441
D03622	Cyclizine hydrochloride (USP)	CN1CCN(C(c2ccccc2)c2ccccc2)CC1.Cl	3743457	nan	3743457
D03628	Cyheptamide (USAN/INN)	NC(=O)C1c2ccccc2CCc2ccccc21	2273660	nan	2273660
D03629	Cypenamine hydrochloride (USAN)	Cl.NC1CCCC1c1ccccc1	3694961	nan	3694961
D03630	Cypothrin (USAN)	CC1(C)C(C(=O)OC(C#N)c2cccc(Oc3ccccc3)c2)C12C=Cc1ccccc12	2229443	nan	2229443
D03631	Cyprazepam (USAN/INN)	[O-][N+]1=C(c2ccccc2)c2cc(Cl)ccc2N=C(NCC2CC2)C1	694716	nan	694716
D03636	Cystine (USAN/INN); L-Cystine (JP17)	NC(CSSCC(N)C(=O)O)C(=O)O	1728091	C01420	1728091
D03642	Daltroban (USAN/INN)	O=C(O)Cc1ccc(CCNS(=O)(=O)c2ccc(Cl)cc2)cc1	4883645	nan	4883645
D03649	Dapoxetine hydrochloride (USAN)	CN(C)C(CCOc1cccc2ccccc12)c1ccccc1.Cl	32311059	nan	32311059
D03650	Darapladib (JAN/USAN)	CCN(CC)CCN(Cc1ccc(-c2ccc(C(F)(F)F)cc2)cc1)C(=O)Cn1c(SCc2ccc(F)cc2)nc(=O)c2c1CCC2	9375368	nan	9375368
D03655	Darodipine (USAN/INN)	CCOC(=O)C1=C(C)NC(C)=C(C(=O)OCC)C1c1cccc2nonc12	5633201	nan	5633201
D03656	Darunavir (USAN/INN)	CC(C)CN(CC(O)C(Cc1ccccc1)NC(=O)OC1COC2OCCC12)S(=O)(=O)c1ccc(N)cc1	22907710	nan	22907710
D03658	Dasatinib (JAN/INN)	Cc1nc(Nc2ncc(C(=O)Nc3c(C)cccc3Cl)s2)cc(N2CCN(CCO)CC2)n1	9966762	nan	9966762
D03661	Dazmegrel (USAN/INN)	Cc1c(Cn2ccnc2)c2ccccc2n1CCC(=O)O	4324219	nan	4324219
D03663	Dazoxiben hydrochloride (USAN)	Cl.O=C(O)c1ccc(OCCn2ccnc2)cc1	4278766	nan	4278766
D03666	Declenperone (USAN/INN)	O=C(c1ccc(F)cc1)C1CCN(CCCn2c(=O)[nH]c3ccccc32)CC1	852272	nan	852272
D03667	Decoquinate (USP/INN); Deccox (TN)	CCCCCCCCCCOc1cc2c(O)c(C(=O)OCC)cnc2cc1OCC	497076	nan	497076
D03669	Deferasirox (JAN/USAN/INN); Exjade (TN); Jadenu (TN)	O=C(O)c1ccc(-n2nc(-c3ccccc3O)nc2-c2ccccc2O)cc1	8442898	nan	8442898
D03670	Deferoxamine (USAN)	CC(=O)N(O)CCCCCNC(=O)CCC(=O)N(O)CCCCCNC(=O)CCC(=O)N(O)CCCCCN	2514118	C06940	2514118
D03689	Deracoxib (USAN)	COc1ccc(-c2cc(C(F)F)nn2-c2ccc(S(N)(=O)=O)cc2)cc1F	7727810	nan	7727810
D03690	Desciclovir (USAN/INN)	Nc1ncc2ncn(COCCO)c2n1	3614015	nan	3614015
D03693	Desloratadine (JAN/USP/INN); Clarinex (TN)	Clc1ccc2c(c1)CCc1cccnc1C2=C1CCNCC1	24578798, 4263164	nan	24578798, 4263164
D03698	Desoxycorticosterone acetate (USP); Doca (TN)	CC(=O)OCC(=O)C1CCC2C3CCC4=CC(=O)CCC4(C)C3CCC12C	1894700	nan	1894700
D03700	Deterenol hydrochloride (USAN)	CC(C)NCC(O)c1ccc(O)cc1.Cl	3717968	nan	3717968
D03702	Detomidine hydrochloride (USAN)	Cc1cccc(Cc2c[nH]cn2)c1C.Cl	8162130	nan	8162130
D03708	Dexamisole (USAN/INN)	c1ccc(C2CN3CCSC3=N2)cc1	612774	nan	612774
D03710	Etoricoxib (USAN/INN)	Cc1ccc(-c2ncc(Cl)cc2-c2ccc(S(C)(=O)=O)cc2)cn1	8073797	C11718	8073797
D03711	Dexetimide (USAN/INN); (+)-Benzetimide	O=C1CCC(c2ccccc2)(C2CCN(Cc3ccccc3)CC2)C(=O)N1	899516, 19162499, 19162495	nan	19162495, 19162499, 899516
D03712	Firocoxib (USAN/INN); Equioxx (TN) [veterinary]	CC1(C)OC(=O)C(OCC2CC2)=C1c1ccc(S(C)(=O)=O)cc1	8335837	C18363	8335837
D03713	Dexfenfluramine hydrochloride (USAN); d-Fenfluramine hydrochloride; Redux (TN)	CCNC(C)Cc1cccc(C(F)(F)F)c1.Cl	5652886	nan	5652886
D03714	Lumiracoxib (USAN/INN)	Cc1ccc(Nc2c(F)cccc2Cl)c(CC(=O)O)c1	9784107	nan	9784107
D03715	Dexibuprofen (USAN/INN)	CC(C)Cc1ccc(C(C)C(=O)O)cc1	8697997, 26616912, 2049713	C01588	2049713, 8697997, 26616912
D03716	Parecoxib (USAN/INN)	CCC(=O)NS(=O)(=O)c1ccc(-c2c(-c3ccccc3)noc2C)cc1	8640266	nan	8640266
D03717	Parecoxib sodium (USAN); Dynastat (TN)	CCC(=O)[N-]S(=O)(=O)c1ccc(-c2c(-c3ccccc3)noc2C)cc1.[Na+]	8664313	nan	8664313
D03719	Dexivacaine (USAN/INN)	Cc1cccc(C)c1NC(=O)C1CCCCN1C	211230	C07528	211230
D03720	Tipifarnib (USAN/INN)	Cn1cncc1C(N)(c1ccc(Cl)cc1)c1ccc2c(c1)c(-c1cccc(Cl)c1)cc(=O)n2C	9733707	nan	9733707
D03721	Dexmethylphenidate hydrochloride (USAN); Focalin (TN)	COC(=O)C(c1ccccc1)C1CCCCN1.Cl	7085276, 7085275, 5780485, 10044941, 6492989, 10045333	nan	5780485, 10045333, 7085276, 6492989, 10044941, 7085275
D03726	Panthenol (USP/INN); DL-Panthenol	CC(C)(CO)C(O)C(=O)NCCCO	1724945	nan	1724945
D03727	Dexpemedolac (USAN/INN)	CCC1(CC(=O)O)OCC(Cc2ccccc2)c2c1[nH]c1ccccc21	13484121	nan	13484121
D03729	Dexpropranolol hydrochloride (USAN)	CC(C)NCC(O)COc1cccc2ccccc12.Cl	4164259	nan	4164259
D03730	Dexrazoxane (JAN/USAN/INN)	CC(CN1CC(=O)NC(=O)C1)N1CC(=O)NC(=O)C1	821182	nan	821182
D03731	Selegiline (USAN/INN); Emsam (TN)	C#CCN(C)C(C)Cc1ccccc1	7410798, 5863318, 2092580	nan	7410798, 2092580, 5863318
D03735	Lecimibide (USAN)	CCCCCCCN(CCCCCSc1nc(-c2ccccc2)c(-c2ccccc2)[nH]1)C(=O)Nc1ccc(F)cc1F	7157689	nan	7157689
D03736	Doramapimod (USAN/INN)	Cc1ccc(-n2nc(C(C)(C)C)cc2NC(=O)Nc2ccc(OCCN3CCOCC3)c3ccccc23)cc1	9170597	nan	9170597
D03737	Dextofisopam (USAN/INN)	CCC1C(C)=NN=C(c2ccc(OC)c(OC)c2)c2cc(OC)c(OC)cc21	629080	nan	629080
D03740	Dextroamphetamine (USAN); Dexamfetamine (INN)	CC(N)Cc1ccccc1	5245231, 6475415, 4230486, 507867, 8760889, 8542057	C07514	8760889, 4230486, 507867, 5245231, 6475415, 8542057
D03742	Dextromethorphan (USP)	COc1ccc2c(c1)C13CCCCC1C(C2)N(C)CC3	1386380	nan	1386380
D03747	Ibrolipim (USAN/INN)	CCOP(=O)(Cc1ccc(C(=O)Nc2ccc(Br)cc2C#N)cc1)OCC	7497256	nan	7497256
D03754	Dezaguanine (USAN/INN)	Nc1cc2[nH]cnc2c(=O)[nH]1	608942	nan	608942
D03757	Dezinamide (USAN/INN)	NC(=O)N1CC(Oc2cccc(C(F)(F)F)c2)C1	13402020	nan	13402020
D03763	Pivopril (USAN/INN)	CC(CSC(=O)C(C)(C)C)C(=O)N(CC(=O)O)C1CCCC1	6573818	nan	6573818
D03766	Diaplasinin (USAN)	CCCCCc1c(-c2ccc3cc(OCc4nnn[nH]4)ccc3c2)n(Cc2ccccc2)c2ccccc12	11245250	nan	11245250
D03768	Diatrizoate sodium I 125 (USAN)	CC(=O)Nc1c(I)c(NC(C)=O)c(I)c(C(=O)[O-])c1I.[Na+]	4082984	nan	4082984
D03770	Diatrizoate sodium I 131 (USAN)	CC(=O)Nc1c(I)c(NC(C)=O)c(I)c(C(=O)[O-])c1I.[Na+]	4082984	nan	4082984
D03771	Diaveridine (USAN/INN)	COc1ccc(Cc2cnc(N)nc2N)cc1OC	258464	nan	258464
D03774	Diaziquone (USAN/INN)	CCOC(=O)NC1=C(N2CC2)C(=O)C(NC(=O)OCC)=C(N2CC2)C1=O	6755590, 1333277, 6753117	nan	6755590, 6753117, 1333277
D03777	Dibenzothiophene (USAN)	c1ccc2c(c1)sc1ccccc12	121101, 5940775	C20125	5940775, 121101
D03780	Dibromsalan (USAN)	O=C(Nc1ccc(Br)cc1)c1cc(Br)ccc1O	1125597	nan	1125597
D03782	Dibutyl sebacate (NF); DBS	CCCCOC(=O)CCCCCCCCC(=O)OCCCC	1798308	nan	1798308
D03786	Vorozole (USAN/INN); Rivizor (TN)	Cn1nnc2ccc(C(c3ccc(Cl)cc3)n3cncn3)cc21	3564942	nan	3564942
D03788	Sivelestat (USAN/INN)	CC(C)(C)C(=O)Oc1ccc(S(=O)(=O)Nc2ccccc2C(=O)NCC(=O)O)cc1	7666855	nan	7666855
D03789	Dichlorodifluoromethane (NF)	FC(F)(Cl)Cl	6380209, 1732393	nan	1732393, 6380209
D03790	Dichlorotetrafluoroethane (NF); Cryofluorane (INN)	FC(F)(Cl)C(F)(F)Cl	1740333	nan	1740333
D03791	Dichlorvos (USAN/INN); Atgard (TN)	COP(=O)(OC)OC=C(Cl)Cl	1709141	C14430	1709141
D03794	Diclazuril (USP/INN)	N#CC(c1ccc(Cl)cc1)c1c(Cl)cc(-n2ncc(=O)[nH]c2=O)cc1Cl	4336873	nan	4336873
D03796	Dicloralurea (USAN/INN)	O=C(NC(O)C(Cl)(Cl)Cl)NC(O)C(Cl)(Cl)Cl	1813364	nan	1813364
D03798	Dicumarol (USAN); Dicoumarol (INN); Dicumarol (TN)	O=c1oc2ccccc2c(O)c1Cc1c(O)c2ccccc2oc1=O	335444	C00796	335444
D03801	Diethylpropion hydrochloride (USP); Tenuate (TN)	CCN(CC)C(C)C(=O)c1ccccc1.Cl	3915870	nan	3915870
D03804	Diethyl phthalate (NF)	CCOC(=O)c1ccccc1C(=O)OCC	1912500	C14175	1912500
D03805	Minalrestat (USAN/INN)	O=C1CC2(C(=O)N1)C(=O)N(Cc1ccc(Br)cc1F)C(=O)c1ccc(F)cc12	7085094	nan	7085094
D03806	Ponalrestat (USAN/INN)	O=C(O)Cc1nn(Cc2ccc(Br)cc2F)c(=O)c2ccccc12	4271042	nan	4271042
D03807	Zenarestat (USAN/INN)	O=C(O)Cn1c(=O)n(Cc2ccc(Br)cc2F)c(=O)c2ccc(Cl)cc21	6617306	nan	6617306
D03809	Difenoxin (USAN/INN)	N#CC(CCN1CCC(C(=O)O)(c2ccccc2)CC1)(c1ccccc1)c1ccccc1	6827931	C07871	6827931
D03822	Rivastigmine (JAN/USP/INN); Exelon (TN); Prometax (TN)	CCN(C)C(=O)Oc1cccc(C(C)N(C)C)c1	3652483	nan	3652483
D03831	Dimefadane (USAN/INN)	CN(C)C1CC(c2ccccc2)c2ccccc21	3322336	nan	3322336
D03836	Dimepranol acedoben (USAN)	CC(=O)Nc1ccc(C(=O)O)cc1.CC(O)CN(C)C	14435807	nan	14435807
D03838	Dimethadione (USAN/INN)	CC1(C)OC(=O)NC1=O	113541	nan	113541
D03842	Telinavir (USAN/INN)	CC(C)CN(CC(O)C(Cc1ccccc1)NC(=O)C(CC(N)=O)NC(=O)c1ccc2ccccc2n1)C(=O)NC(C)(C)C	11326973	nan	11326973
D03845	Sezolamide hydrochloride (USAN)	CC(C)CNC1CCS(=O)(=O)c2sc(S(N)(=O)=O)cc21.Cl	6580716	nan	6580716
D03846	Dimethyl fumarate (JAN/USAN); Tecfidera (TN)	COC(=O)C=CC(=O)OC	8137488	nan	8137488
D03850	Diotyrosine I 125 (USAN)	NC(Cc1cc(I)c(O)c(I)c1)C(=O)O	6814696, 2218690, 6063549	nan	2218690, 6814696, 6063549
D03853	Dioxybenzone (USP/INN)	COc1ccc(C(=O)c2ccccc2O)c(O)c1	2055461	C14283	2055461
D03857	Diotyrosine I 131 (USAN)	NC(Cc1cc(I)c(O)c(I)c1)C(=O)O	6814696, 2218690, 6063549	nan	2218690, 6814696, 6063549
D03858	Diphenidol (USAN/INN)	OC(CCCN1CCCCC1)(c1ccccc1)c1ccccc1	265884	C06961	265884
D03860	Diphenoxylate hydrochloride (USP)	CCOC(=O)C1(c2ccccc2)CCN(CCC(C#N)(c2ccccc2)c2ccccc2)CC1.Cl	6260600	nan	6260600
D03862	Dipyrithione (USAN/INN)	[O-][n+]1ccccc1SSc1cccc[n+]1[O-]	217725	nan	217725
D03871	Disobutamide (USAN/INN)	CC(C)N(CCC(CCN1CCCCC1)(C(N)=O)c1ccccc1Cl)C(C)C	1267542	nan	1267542
D03873	Disofenin (USAN/INN)	CC(C)c1cccc(C(C)C)c1NC(=O)CN(CC(=O)O)CC(=O)O	5132897	nan	5132897
D03874	Disoxaril (USAN/INN)	Cc1cc(CCCCCCCOc2ccc(C3=NCCO3)cc2)on1	3626820	C06496	3626820
D03879	Dobutamine (USAN/INN)	CC(CCc1ccc(O)cc1)NCCc1ccc(O)c(O)c1	2946389	C06967	2946389
D03882	Docebenone (USAN/INN)	CC1=C(C)C(=O)C(CCCCC#CCCCC#CCO)=C(C)C1=O	4262656	C01349	4262656
D03883	Doconazole (USAN/INN)	Clc1ccc(C2(Cn3ccnc3)OCC(COc3ccc(-c4ccccc4)cc3)O2)c(Cl)c1	633593	nan	633593
D03884	Docosanol (USAN); Abreva (TN)	CCCCCCCCCCCCCCCCCCCCCCO	1770470	nan	1770470
D03890	Dopamantine (USAN/INN)	O=C(NCCc1ccc(O)c(O)c1)C12CC3CC(CC(C3)C1)C2	2817829	nan	2817829
D03898	Doxofylline (USAN/INN); Maxivent (TN)	Cn1c(=O)c2c(ncn2CC2OCCO2)n(C)c1=O	561195	nan	561195
D03913	Drometrizole (USAN/INN)	Cc1ccc(O)c(-n2nc3ccccc3n2)c1	615546	nan	615546
D03914	Dronedarone hydrochloride (USP); Multaq (TN)	CCCCc1oc2ccc(NS(C)(=O)=O)cc2c1C(=O)c1ccc(OCCCN(CCCC)CCCC)cc1.Cl	22533997, 8380427	nan	8380427, 22533997
D03915	Droprenilamine (USAN/INN); Valcor (TN)	CC(CC1CCCCC1)NCCC(c1ccccc1)c1ccccc1	2874734	nan	2874734
D03924	Dymanthine hydrochloride (USAN)	CCCCCCCCCCCCCCCCCCN(C)C.Cl	7654625	nan	7654625
D03929	Ecadotril (USAN/INN)	CC(=O)SCC(Cc1ccccc1)C(=O)NCC(=O)OCc1ccccc1	6347114	nan	6347114
D03934	Eclazolast (USAN/INN)	CCOCCOC(=O)c1nc2cc(Cl)ccc2o1	9853130	nan	9853130
D03936	Econazole (USAN/INN)	Clc1ccc(COC(Cn2ccnc2)c2ccc(Cl)cc2Cl)cc1	964150	C08068	964150
D03938	Ecopladib (USAN/INN)	O=C(O)c1ccc(OCCc2c(CCNS(=O)(=O)Cc3ccc(Cl)c(Cl)c3)n(C(c3ccccc3)c3ccccc3)c3ccc(Cl)cc23)cc1	11008478	nan	11008478
D03942	Edatrexate (USAN/INN)	CCC(Cc1cnc2nc(N)nc(N)c2n1)c1ccc(C(=O)NC(CCC(=O)O)C(=O)O)cc1	5679053	nan	5679053
D03948	Edetol (USAN); Neutrol TE (TN)	CC(O)CN(CCN(CC(C)O)CC(C)O)CC(C)O	1781143	nan	1781143
D03961	Efaproxiral (USAN/INN)	Cc1cc(C)cc(NC(=O)Cc2ccc(OC(C)(C)C(=O)O)cc2)c1	4267600	nan	4267600
D03962	Efaproxiral sodium (USAN)	Cc1cc(C)cc(NC(=O)Cc2ccc(OC(C)(C)C(=O)[O-])cc2)c1.[Na+]	8959239	nan	8959239
D03967	Egtazic acid (USAN)	O=C(O)CN(CCOCCOCCN(CC(=O)O)CC(=O)O)CC(=O)O	1717370	nan	1717370
D03975	Allylisopropylacetylurea; Apronal; Apronalide	C=CCC(C(=O)NC(N)=O)C(C)C	1775529	nan	1775529
D03979	Elucaine (USAN)	CCN(CC)CC(OC(=O)c1ccccc1)c1ccccc1	2220826	nan	2220826
D03987	Emitefur (USAN/INN)	CCOCn1cc(F)c(=O)n(C(=O)c2cccc(C(=O)Oc3nc(OC(=O)c4ccccc4)ccc3C#N)c2)c1=O	6625644	nan	6625644
D03988	Aminopropylon	Cc1c(NC(=O)C(C)N(C)C)c(=O)n(-c2ccccc2)n1C	38137	nan	38137
D03991	Encainide hydrochloride (USAN)	COc1ccc(C(=O)Nc2ccccc2CCC2CCCCN2C)cc1.Cl	6360008	nan	6360008
D03993	Encyprate (USAN/INN)	CCOC(=O)N(Cc1ccccc1)C1CC1	2648343	nan	2648343
D03997	Enilconazole (USAN/INN)	C=CCOC(Cn1ccnc1)c1ccc(Cl)cc1Cl	545683	C18739	545683
D03998	Eniluracil (USAN/INN)	C#Cc1c[nH]c(=O)[nH]c1=O	638299	nan	638299
D04004	Enoximone (USAN/INN); Perfan (TN)	CSc1ccc(C(=O)c2[nH]c(=O)[nH]c2C)cc1	5036229	nan	5036229
D04006	Enprofylline (USAN/INN)	CCCn1c(=O)[nH]c(=O)c2[nH]cnc21	4189165	nan	4189165
D04007	Enpromate (USAN/INN)	C#CC(OC(=O)NC1CCCCC1)(c1ccccc1)c1ccccc1	2669373	nan	2669373
D04013	Enzacamene (USP/INN); Eusolex (TN)	Cc1ccc(C=C2C(=O)C3(C)CCC2C3(C)C)cc1	9213949	nan	9213949
D04014	Enzastaurin hydrochloride (JAN/USAN)	Cl.Cn1cc(C2=C(c3cn(C4CCN(Cc5ccccn5)CC4)c4ccccc34)C(=O)NC2=O)c2ccccc21	14413818	nan	14413818
D04028	Orlistat (JAN/USP/INN); Xenical (TN)	CCCCCCCCCCCC(CC1OC(=O)C1CCCCCC)OC(=O)C(CC(C)C)NC=O	14346758	nan	14346758
D04031	Rubitecan (USAN/INN)	CCC1(O)C(=O)OCc2c1cc1n(c2=O)Cc2cc3c([N+](=O)[O-])cccc3nc2-1	6377386	nan	6377386
D04040	Eprosartan (USAN/INN)	CCCCc1ncc(C=C(Cc2cccs2)C(=O)O)n1Cc1ccc(C(=O)O)cc1	14464259	nan	14464259
D04042	Erbulozole (USAN/INN)	CCOC(=O)Nc1ccc(SCC2COC(Cn3ccnc3)(c3ccc(OC)cc3)O2)cc1	14847951	nan	14847951
D04051	Erythrityl tetranitrate (USAN); Eritrityl tetranitrate (INN); Cardilate (TN)	O=[N+]([O-])OCC(O[N+](=O)[O-])C(CO[N+](=O)[O-])O[N+](=O)[O-]	1809116	nan	1809116
D04056	Esomeprazole sodium (USAN); Nexium IV (TN)	COc1ccc2[n-]c(S(=O)Cc3ncc(C)c(OC)c3C)nc2c1.[Na+]	28807844, 14510537, 11512125	nan	11512125, 14510537, 28807844
D04057	Esoxybutynin chloride (USAN)	CCN(CC)CC#CCOC(=O)C(O)(c1ccccc1)C1CCCCC1.Cl	4833152	nan	4833152
D04061	Estradiol acetate (USAN); Femring (TN)	CC(=O)Oc1ccc2c(c1)CCC1C2CCC2(C)C(O)CCC12	1915768	nan	1915768
D04072	Etafedrine hydrochloride (USAN); Nethamine (TN)	CCN(C)C(C)C(O)c1ccccc1.Cl	4014501	nan	4014501
D04074	Etalocib (USAN)	CCCc1c(OCCCOc2cc(O)c(-c3ccc(F)cc3)cc2CC)cccc1Oc1ccccc1C(=O)O	7400417	nan	7400417
D04075	Etanidazole (USAN/INN); Radinyl (TN)	O=C(Cn1ccnc1[N+](=O)[O-])NCCO	919296	nan	919296
D04076	Etarotene (USAN)	CCS(=O)(=O)c1ccc(C=C(C)c2ccc3c(c2)C(C)(C)CCC3(C)C)cc1	15194621	nan	15194621
D04079	Ethacrynate sodium (USP)	C=C(CC)C(=O)c1ccc(OCC(=O)[O-])c(Cl)c1Cl.[Na+]	8662559	nan	8662559
D04080	Ethamivan (USAN/INN); Vandid (TN)	CCN(CC)C(=O)c1ccc(O)c(OC)c1	2694478	nan	2694478
D04089	Ethyl dibunate (USAN/INN); Neodyne (TN)	CCOS(=O)(=O)c1cc(C(C)(C)C)cc2cc(C(C)(C)C)ccc12	2393311	nan	2393311
D04090	Ethyl oleate (NF)	CCCCCCCCC=CCCCCCCCC(=O)OCC	1727317	nan	1727317
D04092	Etryptamine acetate (USAN)	CC(=O)O.CCC(N)Cc1c[nH]c2ccccc12	3767178	nan	3767178
D04095	Etidocaine (USAN/INN)	CCCN(CC)C(CC)C(=O)Nc1c(C)cccc1C	nan	C07530	C07530
D04096	Etifenin (USAN)	CCc1cccc(CC)c1NC(=O)CN(CC(=O)O)CC(=O)O	5121677	nan	5121677
D04098	Etintidine hydrochloride (USAN)	C#CCNC(=NC#N)NCCSCc1nc[nH]c1C.Cl	6455761	nan	6455761
D04101	Etocrylene (USAN); Etocrilene (INN)	CCOC(=O)C(C#N)=C(c1ccccc1)c1ccccc1	1885803	nan	1885803
D04102	Etofenamate (USAN/INN)	O=C(OCCOCCO)c1ccccc1Nc1cccc(C(F)(F)F)c1	2953263	nan	2953263
D04108	Etoprine (USAN)	CCc1nc(N)nc(N)c1-c1ccc(Cl)c(Cl)c1	244129	nan	244129
D04111	Etozolin (USAN/INN)	CCOC(=O)C=C1SC(N2CCCCC2)C(=O)N1C	1084003	nan	1084003
D04112	Etravirine (JAN/USAN/INN); Intelence (TN)	Cc1cc(C#N)cc(C)c1Oc1nc(Nc2ccc(C#N)cc2)nc(N)c1Br	8945855	nan	8945855
D04115	Eucalyptol (USP); Cineole	CC12CCC(CC1)C(C)(C)O2	5239941, 105109	C09844	5239941, 105109
D04117	Eugenol (USP)	C=CCc1ccc(O)c(OC)c1	1366759	C10453	1366759
D04124	Fadolmidine hydrochloride (USAN)	Cl.Oc1ccc2c(c1)C(Cc1c[nH]cn1)CC2	11737429	nan	11737429
D04128	Fandosentan potassium (USAN)	CCc1cc(C2=C(C(=O)[O-])N(c3ccccc3C(F)(F)F)S(=O)(=O)c3ccccc32)cc2c1OCO2.[K+]	10411060	nan	10411060
D04131	Farampator (USAN/INN); Org 24448	O=C(c1ccc2nonc2c1)N1CCCCC1	13677286	nan	13677286
D04138	Fenalamide (USAN)	CCOC(=O)C(CC)(C(=O)NCCN(CC)CC)c1ccccc1	3992093	nan	3992093
D04139	Fenamole (USAN)	Nc1nnnn1-c1ccccc1	139069	nan	139069
D04140	Fenbendazole (USP/INN); Panacur [veterinary] (TN)	COC(=O)Nc1nc2cc(Sc3ccccc3)ccc2[nH]1	759077	C21876	759077
D04141	Fencibutirol (USAN/INN); Verecolene (TN)	CCC(C(=O)O)C1(O)CCC(c2ccccc2)CC1	2123428	nan	2123428
D04142	Fenclofenac (USAN/INN)	O=C(O)Cc1ccccc1Oc1ccc(Cl)cc1Cl	2752546	nan	2752546
D04143	Fenclonine (USAN/INN)	NC(Cc1ccc(Cl)cc1)C(=O)O	2805758	nan	2805758
D04145	Fendosal (USAN/INN); Alnovin (TN)	O=C(O)c1cc(-n2c(-c3ccccc3)cc3c2CCc2ccccc2-3)ccc1O	1665211	nan	1665211
D04148	Fenfluramine hydrochloride (USAN); Pondimin (TN)	CCNC(C)Cc1cccc(C(F)(F)F)c1.Cl	5652886	nan	5652886
D04151	Fenleuton (USAN/INN); Lofrin [veterinary] (TN)	CC(C#Cc1cccc(Oc2ccc(F)cc2)c1)N(O)C(N)=O	7773322	nan	7773322
D04157	Fenoterol (USAN/INN)	CC(Cc1ccc(O)cc1)NCC(O)c1cc(O)cc(O)c1	2157041	nan	2157041
D04158	Fenpipalone (USAN/INN)	CN1CC(CCN2CC=C(c3ccccc3)CC2)OC1=O	1222903	nan	1222903
D04162	Fenretinide (USAN/INN)	CC(C=CC1=C(C)CCCC1(C)C)=CC=CC(C)=CC(=O)Nc1ccc(O)cc1	14504028	nan	14504028
D04164	Fenticlor (USAN/INN)	Oc1ccc(Cl)cc1Sc1cc(Cl)ccc1O	2057140	nan	2057140
D04166	Ferric chloride Fe 59 (USAN)	Cl[Fe](Cl)Cl	3660451, 3903066	nan	3660451, 3903066
D04173	Ferrous sulfate Fe 59 (USAN)	O=S(=O)([O-])[O-].[Fe+2]	27729041, 15040645	nan	15040645, 27729041
D04183	Fidexaban (USAN/INN)	CN1CCN=C1c1cccc(Oc2nc(Oc3cc(C(=N)N)ccc3O)c(F)c(N(C)CC(=O)O)c2F)c1	8025985	nan	8025985
D04187	Fingolimod hydrochloride (JAN/USAN); Gilenya (TN)	CCCCCCCCc1ccc(CCC(N)(CO)CO)cc1.Cl	7837310, 22916915	nan	22916915, 7837310
D04189	Flazalone (USAN)	CN1CCC(O)(c2ccc(F)cc2)C(C(=O)c2ccc(F)cc2)C1	1553013	nan	1553013
D04192	Flindokalner (USAN/INN); Maxipost (TN)	COc1ccc(Cl)cc1C1(F)C(=O)Nc2cc(C(F)(F)F)ccc21	9149203	nan	9149203
D04193	Flordipine (USAN/INN)	CCOC(=O)C1=C(C)N(CCN2CCOCC2)C(C)=C(C(=O)OCC)C1c1ccccc1C(F)(F)F	13357014	nan	13357014
D04194	Florfenicol (USAN/INN); Nuflor (TN)	CS(=O)(=O)c1ccc(C(O)C(CF)NC(=O)C(Cl)Cl)cc1	13416782	nan	13416782
D04195	Flosequinan (USAN/INN)	Cn1cc(S(C)=O)c(=O)c2ccc(F)cc21	5815383	nan	5815383
D04196	Floxacillin (USAN); Flucloxacillin (INN); MFIPC; Floxapen (TN)	Cc1onc(-c2c(F)cccc2Cl)c1C(=O)NC1C(=O)N2C1SC(C)(C)C2C(=O)O	1191677	nan	1191677
D04197	Floxuridine (USP/INN); FUDR (TN)	O=c1[nH]c(=O)n(C2CC(O)C(CO)O2)cc1F	24714617	nan	24714617
D04200	Flubendazole (USAN/INN)	COC(=O)Nc1nc2cc(C(=O)c3ccc(F)cc3)ccc2[nH]1	763480	nan	763480
D04206	Flufenisal (USAN/INN)	CC(=O)Oc1ccc(-c2ccc(F)cc2)cc1C(=O)O	2220113	nan	2220113
D04209	Flumetramide (USAN/INN); Duraflex (TN)	O=C1COC(c2ccc(C(F)(F)F)cc2)CN1	1123647	nan	1123647
D04210	Fluminorex (USAN/INN)	NC1=NCC(c2ccc(C(F)(F)F)cc2)O1	530245	nan	530245
D04213	Flunidazole (USAN/INN)	O=[N+]([O-])c1cnc(-c2ccc(F)cc2)n1CCO	961831	nan	961831
D04215	Flunixin (USAN/INN)	Cc1c(Nc2ncccc2C(=O)O)cccc1C(F)(F)F	492802	nan	492802
D04220	Fluorodopa F 18 (USAN); Fluorodopa F18 (TN)	NC(Cc1cc(O)c(O)cc1F)C(=O)O	5956104	nan	5956104
D04222	Fluorosalan (USAN); Flusalan (INN)	O=C(Nc1cccc(C(F)(F)F)c1)c1cc(Br)cc(Br)c1O	1155294	nan	1155294
D04229	Fluproquazone (USAN/INN); Tormosyl (TN)	Cc1ccc2c(-c3ccc(F)cc3)nc(=O)n(C(C)C)c2c1	891838	nan	891838
D04230	Fluquazone (USAN/INN)	O=c1nc(-c2ccccc2)c2cc(Cl)ccc2n1CC(F)(F)F	898015	nan	898015
D04234	Flurofamide (USAN/INN)	NP(N)(=O)NC(=O)c1ccc(F)cc1	7479460	nan	7479460
D04236	Flurothyl (USAN); Flurotyl (INN); Indoklon (TN)	FC(F)(F)COCC(F)(F)F	1811927	nan	1811927
D04237	Fluroxene (USAN); Fluoromar (TN)	C=COCC(F)(F)F	1745876	nan	1745876
D04238	Flutiazin (USAN/INN)	O=C(O)c1cccc2c1Nc1cc(C(F)(F)F)ccc1S2	824403	nan	824403
D04239	Fluzinamide (USAN/INN)	CNC(=O)N1CC(Oc2cccc(C(F)(F)F)c2)C1	13322928	nan	13322928
D04241	Fodipir (USAN/INN)	Cc1ncc(COP(=O)(O)O)c(CN(CCN(CC(=O)O)Cc2c(COP(=O)(O)O)cnc(C)c2O)CC(=O)O)c1O	9312011	nan	9312011
D04247	Fosarilate (USAN/INN)	CCOP(=O)(CCCCCCOc1ccc(OC)cc1Cl)OCC	5980370	nan	5980370
D04253	Fosfomycin (USAN/INN); Phosphonomycin; FCM	CC1OC1P(=O)(O)O	4129718	nan	4129718
D04256	Fospirate (USAN/INN)	COP(=O)(OC)Oc1nc(Cl)c(Cl)cc1Cl	1541077	nan	1541077
D04260	Fostedil (USAN/INN)	CCOP(=O)(Cc1ccc(-c2nc3ccccc3s2)cc1)OCC	3626546	nan	3626546
D04277	Furobufen (USAN/INN)	O=C(O)CCC(=O)c1ccc2oc3ccccc3c2c1	250326	nan	250326
D04278	Furodazole (USAN/INN); Furodazole anhydrous	Cc1cc(O)c2c(ccc3nc(-c4ccco4)[nH]c32)n1	1013071	nan	1013071
D04282	Gaboxadol (USAN/INN)	O=c1[nH]oc2c1CCNC2	9997090	C13693	9997090
D04284	Gadodiamide (USP/INN); Omniscan (TN)	CNC(=O)CN(CCN(CCN(CC(=O)[O-])CC(=O)NC)CC(=O)[O-])CC(=O)[O-].[Gd+3]	14707344	nan	14707344
D04291	Galactose (NF); alpha-D-Galactose	OCC1OC(O)C(O)C(O)C1O	1907357	C00738	1907357
D04292	Galantamine (USAN/INN); Reminyl (TN)	COc1ccc2c3c1OC1CC(O)C=CC31CCN(C)C2	14385608, 625778	nan	14385608, 625778
D04298	Gamfexine (USAN/INN)	CN(C)CCC(c1ccccc1)C1CCCCC1	3294764	nan	3294764
D04309	Gemcabene calcium (USAN)	CC(C)(CCCCOCCCCC(C)(C)C(=O)[O-])C(=O)[O-].[Ca+2]	11788187	nan	11788187
D04310	Gemcadiol (USAN/INN)	CC(C)(CO)CCCCCCC(C)(C)CO	1748265	nan	1748265
D04320	Glemanserin (USAN/INN)	OC(c1ccccc1)C1CCN(CCc2ccccc2)CC1	4296881	nan	4296881
D04327	Gloxazone (USAN/INN); Contrapar (TN)	CCOC(C)C(C=NNC(N)=S)=NNC(N)=S	1915287	nan	1915287
D04330	Gluceptate sodium (USAN)	O=C([O-])C(O)C(O)C(O)C(O)C(O)CO.[Na+]	30036201	nan	30036201
D04332	Gluconolactone (USP); D-Gluconolactone	O=C1OC(CO)C(O)C(O)C1O	13905182, 18183914	nan	13905182, 18183914
D04334	Glucosamine (USAN/INN); D-Glucosamine	NC1C(O)OC(CO)C(O)C1O	2325668	nan	2325668
D04341	Glutamic acid (USAN); DL-Glutamic acid	NC(CCC(=O)O)C(=O)O	6131105, 1723799, 9906463, 3588482, 3588483, 6899139, 4661739	C00302	4661739, 1723799, 6899139, 3588483, 3588482, 9906463, 6131105
D04350	Glyceryl behenate (NF)	CCCCCCCCCCCCCCCCCCCCCC(=O)OCC(COC(=O)CCCCCCCCCCCCCCCCCCCCC)OC(=O)CCCCCCCCCCCCCCCCCCCCC	1811476	nan	1811476
D04353	Glycol distearate (USAN)	CCCCCCCCCCCCCCCCCC(=O)OCCOC(=O)CCCCCCCCCCCCCCCCC	1809924	nan	1809924
D04370	Granisetron (JAN/USAN/INN); Sancuso (TN)	CN1C2CCCC1CC(NC(=O)c1nn(C)c3ccccc13)C2	15426873, 6660726	nan	15426873, 6660726
D04375	Guanabenz (USAN/INN)	N=C(N)NN=Cc1c(Cl)cccc1Cl	2053227	nan	2053227
D04378	Guancydine (USAN)	CCC(C)(C)NC(N)=NC#N	3045890	nan	3045890
D04400	Sodium phosphate, monobasic (USP); Anhydrous monobasic sodium phosphate	O=P([O-])(O)O.[Na+]	31963081, 18774335, 27740133, 21358122, 11341018, 11343564	nan	11343564, 27740133, 11341018, 21358122, 18774335, 31963081
D04411	Halofenate (USAN/INN)	CC(=O)NCCOC(=O)C(Oc1cccc(C(F)(F)F)c1)c1ccc(Cl)cc1	11596172, 2190872, 11326911	nan	11596172, 2190872, 11326911
D04436	Hexaminolevulinate hydrochloride (USAN); Cysview (TN)	CCCCCCOC(=O)CCC(=O)CN.Cl	8728662, 30609611	nan	30609611, 8728662
D04437	Hexedine (USAN/INN); Sterisol (TN)	CCCCC(CC)CN1CN2CN(CC(CC)CCCC)CC2(C)C1	883558	nan	883558
D04438	Hexobendine (USAN/INN)	COc1cc(C(=O)OCCCN(C)CCN(C)CCCOC(=O)c2cc(OC)c(OC)c(OC)c2)cc(OC)c1OC	2200156	nan	2200156
D04439	Hexylene glycol (NF)	CC(O)CC(C)(C)O	1098298	nan	1098298
D04441	Hexylresorcinol (USP)	CCCCCCc1ccc(O)cc1O	2048312	nan	2048312
D04450	Homosalate (USP/INN); Eusolex (TN)	CC1CC(OC(=O)c2ccccc2O)CC(C)(C)C1	2731604	nan	2731604
D04473	Hydroxyamphetamine hydrobromide (USP); Paredrine (TN)	Br.CC(N)Cc1ccc(O)cc1	3696279	nan	3696279
D04485	Ibafloxacin (USAN/INN)	Cc1c(F)cc2c(=O)c(C(=O)O)cn3c2c1CCC3C	6068400	nan	6068400
D04486	Ibandronate sodium (USAN); Ibandronate sodium hydrate (JAN); Ibandronate sodium monohydrate; Bondronat (TN); Boniva (TN); Bonviva (TN)	CCCCCN(C)CCC(O)(P(=O)([O-])O)P(=O)(O)O.O.[Na+]	19147134, 11333707	nan	11333707, 19147134
D04488	Ibopamine (USAN/INN)	CNCCc1ccc(OC(=O)C(C)C)c(OC(=O)C(C)C)c1	2871014	nan	2871014
D04498	Idronoxil (USAN/INN)	Oc1ccc(C2=Cc3ccc(O)cc3OC2)cc1	5037557	nan	5037557
D04500	Ifetroban (USAN/INN)	CCCCCNC(=O)c1coc(C2C3CCC(O3)C2Cc2ccccc2CCC(=O)O)n1	14001980	nan	14001980
D04504	Ilmofosine (USAN/INN)	CCCCCCCCCCCCCCCCSCC(COC)COP(=O)([O-])OCC[N+](C)(C)C	4767637	nan	4767637
D04507	Imafen hydrochloride (USAN)	Cl.c1ccc(C2CN=C3NCCN32)cc1	13274755	nan	13274755
D04509	Imcarbofos (USAN/INN)	CCOP(=O)(NC(=S)Nc1ccc(NC(=S)NP(=O)(OCC)OCC)c(OC)c1)OCC	3041966	nan	3041966
D04513	Imidurea (NF)	O=C(NCNC(=O)NC1C(=O)NC(=O)N1CO)NC1C(=O)NC(=O)N1CO	8731946	nan	8731946
D04514	Imiloxan hydrochloride (USAN)	CCn1ccnc1CC1COc2ccccc2O1.Cl	5191149	nan	5191149
D04520	Indacrinone (USAN/INN)	CC1(c2ccccc2)Cc2cc(OCC(=O)O)c(Cl)c(Cl)c2C1=O	2063182	nan	2063182
D04521	Indecainide hydrochloride (USAN); Decabid (TN)	CC(C)NCCCC1(C(N)=O)c2ccccc2-c2ccccc21.Cl	13328284	nan	13328284
D04522	Indisulam (USAN/INN)	NS(=O)(=O)c1ccc(S(=O)(=O)Nc2cccc3c(Cl)c[nH]c23)cc1	8437911	nan	8437911
D04529	Indolidan (USAN/INN)	CC1(C)C(=O)Nc2ccc(C3=NNC(=O)CC3)cc21	4874739	nan	4874739
D04530	Indoprofen (USAN/INN)	CC(C(=O)O)c1ccc(N2Cc3ccccc3C2=O)cc1	1543920	nan	1543920
D04532	Indoramin hydrochloride (USAN)	Cl.O=C(NC1CCN(CCc2c[nH]c3ccccc23)CC1)c1ccccc1	3640397	nan	3640397
D04533	Indorenate hydrochloride (USAN)	COC(=O)C(CN)c1c[nH]c2ccc(OC)cc12.Cl	4611165	nan	4611165
D04534	Indoxole (USAN)	COc1ccc(-c2[nH]c3ccccc3c2-c2ccc(OC)cc2)cc1	1544424	nan	1544424
D04561	Iocanlidic acid I 123 (USAN); Iocanlidic acid (123I) (INN)	O=C(O)CCCCCCCCCCCCCCc1ccc(I)cc1	5964440	nan	5964440
D04565	Iodoantipyrine I 131 (USAN)	Cc1c(I)c(=O)n(-c2ccccc2)n1C	181670	nan	181670
D04566	Iodocetylic acid I 123 (USAN); Iodocetylic acid (123I) (INN)	O=C(O)CCCCCCCCCCCCCCCI	1783744	nan	1783744
D04574	Ioglicic acid (USAN/INN)	CNC(=O)CNC(=O)c1c(I)c(NC(C)=O)c(I)c(C(=O)O)c1I	2784717	nan	2784717
D04577	Ioglycamic acid (USAN/INN)	O=C(COCC(=O)Nc1c(I)cc(I)c(C(=O)O)c1I)Nc1c(I)cc(I)c(C(=O)O)c1I	2200244	nan	2200244
D04579	Iomethin I 125 (USAN)	CN(C)CCCNc1ccnc2cc(I)ccc12	478041	nan	478041
D04580	Iomethin I 131 (USAN)	CN(C)CCCNc1ccnc2cc(I)ccc12	478041	nan	478041
D04582	Iopentol (USAN/INN)	COCC(O)CN(C(C)=O)c1c(I)c(C(=O)NCC(O)CO)c(I)c(C(=O)NCC(O)CO)c1I	7062221	nan	7062221
D04585	Iopronic acid (USAN/INN); Bilimiron (TN)	CCC(COCCOc1c(I)cc(I)c(NC(C)=O)c1I)C(=O)O	2782342	nan	2782342
D04586	Iopydol (USAN)	O=c1c(I)cn(CC(O)CO)cc1I	160129	nan	160129
D04587	Iopydone (USAN)	O=c1c(I)c[nH]cc1I	1447538	nan	1447538
D04589	Ioseric acid (USAN/INN)	CNC(=O)C(CO)NC(=O)c1c(I)c(NC(=O)COC)c(I)c(C(=O)O)c1I	2404724	nan	2404724
D04594	Ammonia water (JP17); Ammonia water (TN)	[NH4+].[OH-]	11342939	C01358	11342939
D04597	Iotyrosine I 131 (USAN)	NC(Cc1ccc(O)c(I)c1)C(=O)O	2215172	nan	2215172
D04600	Ioxotrizoic acid (USAN/INN)	CC(=O)Nc1c(I)c(NC(=O)CO)c(I)c(C(=O)O)c1I	2901482	nan	2901482
D04605	Iprindole (USAN/INN)	CN(C)CCCn1c2c(c3ccccc31)CCCCCC2	1386299	nan	1386299
D04608	Ipronidazole (USAN/INN)	CC(C)c1ncc([N+](=O)[O-])n1C	744577	nan	744577
D04614	Irofulven (USAN/INN)	CC1=C(CO)C2=C(C)C3(CC3)C(C)(O)C(=O)C2=C1	7689652	nan	7689652
D04618	Isamoxole (USAN/INN)	CCCCN(C(=O)C(C)C)c1nc(C)co1	613344	nan	613344
D04622	Isobutamben (USAN/INN)	CC(C)COC(=O)c1ccc(N)cc1	2804349	nan	2804349
D04624	Isoconazole (USAN/INN)	Clc1ccc(C(Cn2ccnc2)OCc2c(Cl)cccc2Cl)c(Cl)c1	6442235	nan	6442235
D04625	Isoetharine (USP); Isoetarine (INN)	CCC(NC(C)C)C(O)c1ccc(O)c(O)c1	2850560	C07053	2850560
D04626	Isoetharine mesylate (USP); Bronkometer (TN)	CCC(NC(C)C)C(O)c1ccc(O)c(O)c1.CS(=O)(=O)O	6554539	nan	6554539
D04632	Isopropyl palmitate (NF)	CCCCCCCCCCCCCCCC(=O)OC(C)C	1786567	nan	1786567
D04633	Isostearyl alcohol (USAN); Witcohol 66 (TN)	CC(C)CCCCCCCCCCCCCCCO	1703362	nan	1703362
D04634	Isosulfan blue (USAN); Lymphazurin (TN)	CCN(CC)c1ccc(C(=C2C=CC(=[N+](CC)CC)C=C2)c2cc(S(=O)(=O)[O-])ccc2S(=O)(=O)[O-])cc1.[Na+]	6560995	nan	6560995
D04635	Isotiquimide (USAN/INN)	Cc1ccnc2c1CCCC2C(N)=S	477316	nan	477316
D04637	Isovaleramide (USAN)	CC(C)CC(N)=O	1740789	nan	1740789
D04638	Isoxepac (USAN/INN); Artil (TN)	O=C(O)Cc1ccc2c(c1)C(=O)c1ccccc1CO2	1320243	nan	1320243
D04639	Isoxicam (USAN/INN); Maxicam (TN)	Cc1cc(NC(=O)C2=C(O)c3ccccc3S(=O)(=O)N2C)no1	577221	nan	577221
D04641	Istradefylline (JAN/USAN/INN); Nourianz (TN); Nouriast (TN)	CCn1c(=O)c2c(nc(C=Cc3ccc(OC)c(OC)c3)n2C)n(CC)c1=O	7863435	nan	7863435
D04643	Itazigrel (USAN/INN)	COc1ccc(-c2nc(C(F)(F)F)sc2-c2ccc(OC)cc2)cc1	1161179	nan	1161179
D04648	Kalafungin (USAN)	CC1OC2CC(=O)OC2C2=C1C(=O)c1c(O)cccc1C2=O	8239729, 8231629	nan	8239729, 8231629
D04657	Lacidipine (USAN/INN); Motens (TN)	CCOC(=O)C1=C(C)NC(C)=C(C(=O)OCC)C1c1ccccc1C=CC(=O)OC(C)(C)C	7395367	nan	7395367
D04669	Lapyrium chloride (USAN); Lapirium chloride (INN)	CCCCCCCCCCCC(=O)OCCNC(=O)C[n+]1ccccc1.[Cl-]	3825294	nan	3825294
D04671	Lasalocid (USAN/INN)	CCC(C(=O)C(C)C(O)C(C)CCc1ccc(C)c(O)c1C(=O)O)C1OC(CC)(C2CCC(O)(CC)C(C)O2)CC1C	376204	nan	376204
D04678	Laurocapram (USAN/INN)	CCCCCCCCCCCCN1CCCCCC1=O	167211	nan	167211
D04681	Lazabemide (USAN/INN)	NCCNC(=O)c1ccc(Cl)cn1	6646689	nan	6646689
D04687	Lenalidomide (USAN/INN); Revlimid (TN)	Nc1cccc2c1CN(C1CCC(=O)NC1=O)C2=O	8335210	nan	8335210
D04698	Leteprinim potassium (USAN); Neotrofin (TN)	O=C(CCn1cnc2c(=O)[nH]cnc21)Nc1ccc(C(=O)[O-])cc1.[K+]	9827165	nan	9827165
D04701	Levalbuterol sulfate (USAN)	CC(C)(C)NCC(O)c1ccc(O)c(CO)c1.O=S(=O)(O)O	11102746, 4221827, 6495207	nan	6495207, 11102746, 4221827
D04706	Levcycloserine (USAN/INN)	NC1CONC1=O	80800, 4658623	C06682	80800, 4658623
D04710	Levobetaxolol hydrochloride (USAN); Betaxon (TN)	CC(C)NCC(O)COc1ccc(CCOCC2CC2)cc1.Cl	5182512	nan	5182512
D04713	Levocarnitine propionate hydrochloride (USAN); Dromos (TN)	CCC(=O)OC(CC(=O)O)C[N+](C)(C)C.[Cl-]	4043840	nan	4043840
D04714	Levofuraltadone (USAN/INN)	O=C1OC(CN2CCOCC2)CN1N=Cc1ccc([N+](=O)[O-])o1	363627	nan	363627
D04716	Levomethadyl acetate (USAN); Levacetylmethadol (INN)	CCC(OC(C)=O)C(CC(C)N(C)C)(c1ccccc1)c1ccccc1	2818018	nan	2818018
D04720	Levosimendan (USAN/INN); Simdax (TN)	CC1CC(=O)NN=C1c1ccc(NN=C(C#N)C#N)cc1	14202958, 6959884	nan	6959884, 14202958
D04721	Levotofisopam (USAN/INN)	CCC1C(C)=NN=C(c2ccc(OC)c(OC)c2)c2cc(OC)c(OC)cc21	629080	nan	629080
D04728	Licostinel (USAN/INN)	O=c1[nH]c2cc(Cl)c(Cl)c([N+](=O)[O-])c2[nH]c1=O	7415459	nan	7415459
D04730	Lidofenin (USAN/INN); Hepato-Scan (TN)	Cc1cccc(C)c1NC(=O)CN(CC(=O)O)CC(=O)O	2820306	nan	2820306
D04734	Alkyldiaminoethylglycine hydrochloride (JAN); Alkylpolyaminoethylglycine hydrochloride; Tego (TN)	Cl.[*]NCCNCCNCC(=O)O	nan	C18370	C18370
D04735	Lifarizine (USAN/INN)	Cc1ccc(-c2nc(C)c(CN3CCN(C(c4ccccc4)c4ccccc4)CC3)[nH]2)cc1	13439294	nan	13439294
D04737	Lifibrol (USAN/INN)	CC(C)(C)c1ccc(CCC(O)COc2ccc(C(=O)O)cc2)cc1	7038701	nan	7038701
D04741	Linopirdine (USAN/INN)	O=C1N(c2ccccc2)c2ccccc2C1(Cc1ccncc1)Cc1ccncc1	6157545	C13780	6157545
D04742	Liothyronine I 125 (USAN); Triomet-125 (TN)	NC(Cc1cc(I)c(Oc2ccc(O)c(I)c2)c(I)c1)C(=O)O	2183205	nan	2183205
D04743	Liothyronine I 131 (USAN); Triomet-131 (TN)	NC(Cc1cc(I)c(Oc2ccc(O)c(I)c2)c(I)c1)C(=O)O	2183205	nan	2183205
D04746	Lisadimate (USAN/INN)	Nc1ccc(C(=O)OCC(O)CO)cc1	2727968	nan	2727968
D04748	Lisofylline (USAN/INN); ProTec (TN)	CC(O)CCCCn1c(=O)c2c(ncn2C)n(C)c1=O	622590	nan	622590
D04752	Lixivaptan (USAN/INN)	Cc1ccc(F)cc1C(=O)Nc1ccc(C(=O)N2Cc3cccn3Cc3ccccc32)c(Cl)c1	8021387	nan	8021387
D04754	Lobendazole (USAN/INN)	CCOC(=O)Nc1nc2ccccc2[nH]1	196378	nan	196378
D04757	Lobucavir (USAN/INN)	Nc1nc2c(ncn2C2CC(CO)C2CO)c(=O)[nH]1	13582013	nan	13582013
D04758	Lodelaben (USAN/INN)	CCCCCCCCCCCCCCCCCC(O)c1ccc(C(=O)O)c(Cl)c1	8363998	nan	8363998
D04760	Lodoxamide ethyl (USAN)	CCOC(=O)C(=O)Nc1cc(C#N)cc(NC(=O)C(=O)OCC)c1Cl	2954881	nan	2954881
D04765	Lofexidine hydrochloride (USAN); Lofexidine (TN); Lucemyra (TN)	CC(Oc1c(Cl)cccc1Cl)C1=NCCN1.Cl	6079315	nan	6079315
D04770	Lonapalene (USAN)	COc1c(OC)c(OC(C)=O)c2cc(Cl)ccc2c1OC(C)=O	4715916	nan	4715916
D04778	Lorcainide hydrochloride (USAN)	CC(C)N1CCC(N(C(=O)Cc2ccccc2)c2ccc(Cl)cc2)CC1.Cl	5687673	nan	5687673
D04789	Lubeluzole (USAN/INN); Prosynap (TN)	CN(c1nc2ccccc2s1)C1CCN(CC(O)COc2ccc(F)c(F)c2)CC1	9439465	nan	9439465
D04793	Lufironil (USAN/INN)	COCCNC(=O)c1ccnc(C(=O)NCCOC)c1	14852489	nan	14852489
D04843	Malic acid (NF); Malate	O=C(O)CC(O)C(=O)O	4660743, 1723539, 11837746, 5246123, 4660744, 8036414, 4291637	C00711	4660744, 8036414, 1723539, 11837746, 5246123, 4291637, 4660743
D04849	dl-Menthol (JP17)	CC1CCC(C(C)C)C(O)C1	5726576, 1902288, 4653905, 5726578, 8144597, 20394954, 4349492, 10674752, 10079766	nan	20394954, 4349492, 10674752, 10079766, 5726576, 8144597, 1902288, 4653905, 5726578
D04854	Manganese sulfate (USP); Manganese sulfate monohydrate; Manganese sulfate (TN)	O.O=S(=O)([O-])[O-].[Mn+2]	17101943, 17092823, 16521815, 16523255, 16476033, 16885926, 16878727, 16470708, 16859675, 16878718, 16523100, 16877569, 13431229, 27172103, 16833899, 19594300, 16523201, 16527593, 13153017, 16877148, 16522892	nan	16885926, 17092823, 16859675, 16833899, 16521815, 27172103, 17101943, 19594300, 16523255, 13153017, 16522892, 16523201, 16527593, 16878718, 16877148, 16476033, 13431229, 16523100, 16470708, 16878727, 16877569
D04862	Masoprocol (USAN/INN); meso-Nordihydroguaiaretic acid; Actinex (TN)	CC(Cc1ccc(O)c(O)c1)C(C)Cc1ccc(O)c(O)c1	9803564	C10719	9803564
D04863	Mavacoxib (USAN)	NS(=O)(=O)c1ccc(-n2nc(C(F)(F)F)cc2-c2ccc(F)cc2)cc1	7726438	nan	7726438
D04864	Maytansine (USAN)	COc1cc2cc(c1Cl)N(C)C(=O)CC(OC(=O)C(C)N(C)C(C)=O)C1(C)OC1C(C)C1CC(O)(NC(=O)O1)C(OC)C=CC=C(C)C2	30211961	nan	30211961
D04869	Mebrofenin (USP/INN)	Cc1cc(C)c(NC(=O)CN(CC(=O)O)CC(=O)O)c(C)c1Br	10474727	nan	10474727
D04872	Mechlorethamine hydrochloride (USP); Chlormethine hydrochloride; Mustargen (TN)	CN(CCCl)CCCl.Cl	3670938	nan	3670938
D04876	Hinokitiol	CC(C)c1cccc(=O)c(O)c1	2045206	C09904	2045206
D04877	Mecloqualone (USAN/INN)	Cc1nc2ccccc2c(=O)n1-c1ccccc1Cl	228324	nan	228324
D04883	Medetomidine hydrochloride (USAN)	Cc1cccc(C(C)c2c[nH]cn2)c1C.Cl	4890476, 23299338	nan	23299338, 4890476
D04884	Medorinone (USAN/INN)	Cc1nccc2[nH]c(=O)ccc12	4308676	nan	4308676
D04887	Medronic acid (USAN)	O=P(O)(O)CP(=O)(O)O	1708494	nan	1708494
D04888	Medroxalol (USAN/INN)	CC(CCc1ccc2c(c1)OCO2)NCC(O)c1ccc(O)c(C(N)=O)c1	5305651	nan	5305651
D04894	Mefexamide (USAN/INN)	CCN(CC)CCNC(=O)COc1ccc(OC)cc1	2219009	nan	2219009
D04895	Mefloquine (USAN/INN)	OC(c1cc(C(F)(F)F)nc2c(C(F)(F)F)cccc12)C1CCCCN1	766168, 6239358, 14261053, 14247915	nan	14261053, 6239358, 766168, 14247915
D04897	Meglutol (USAN/INN)	CC(O)(CC(=O)O)CC(=O)O	1769194	C03761	1769194
D04905	Memantine hydrochloride (JAN/USP); Namenda (TN); Memary (TN)	CC12CC3CC(C)(C1)CC(N)(C3)C2.Cl	6573843, 28570174	nan	28570174, 6573843
D04912	Menoctone (USAN/INN)	O=C1C(O)=C(CCCCCCCCC2CCCCC2)C(=O)c2ccccc21	2059429	nan	2059429
D04918	Menthol (USP); Fisherman's friend lozenges (TN)	CC1CCC(C(C)C)C(O)C1	5726576, 1902288, 4653905, 5726578, 8144597, 20394954, 4349492, 10674752, 10079766	nan	20394954, 4349492, 10674752, 10079766, 5726576, 8144597, 1902288, 4653905, 5726578
D04924	Meptazinol hydrochloride (USAN)	CCC1(c2cccc(O)c2)CCCCN(C)C1.Cl	4337683	nan	4337683
D04925	Mequidox (USAN/INN)	Cc1c(CO)[n+]([O-])c2ccccc2[n+]1[O-]	184113	nan	184113
D04926	Mequinol (USAN/INN)	COc1ccc(O)cc1	4248065, 6386046, 507924	nan	4248065, 6386046, 507924
D04927	Meradimate (USP/INN)	CC1CCC(C(C)C)C(OC(=O)c2ccccc2N)C1	3208383	nan	3208383
D04931	Mercaptopurine (INN); Mercaptopurine anhydrous; Purinethol (TN)	S=c1nc[nH]c2nc[nH]c12	8391841	C02380	8391841
D04932	Mercufenol chloride (USAN)	Oc1ccccc1[Hg]Cl	3662387	nan	3662387
D04950	Metabromsalan (USAN)	O=C(Nc1ccccc1)c1cc(Br)cc(Br)c1O	2130998	nan	2130998
D04951	Metacresol (USP); m-Cresol	Cc1cccc(O)c1	506719, 4244927	C01467	4244927, 506719
D04955	Sematilide hydrochloride (USAN)	CCN(CC)CCNC(=O)c1ccc(NS(C)(=O)=O)cc1.Cl	3578137	nan	3578137
D04966	Metformin (USAN/INN)	CN(C)C(=N)NC(=N)N	606492	C07151	606492
D04970	Methacholine chloride (JAN/USP/INN); Provocholine (TN)	CC(=O)OC(C)C[N+](C)(C)C.[Cl-]	4162373	nan	4162373
D04973	Methadyl acetate (USAN); Acetylmethadol (INN)	CCC(OC(C)=O)C(CC(C)N(C)C)(c1ccccc1)c1ccccc1	2818018	nan	2818018
D04975	Methallibure (USAN/INN)	C=CC(C)NC(=S)NNC(=S)NC	1212512	nan	1212512
D04979	Methdilazine (INN); Tacaryl (TN)	CN1CCC(CN2c3ccccc3Sc3ccccc32)C1	31266	C07175	31266
D04982	Methetoin (USAN/INN)	CCC1(c2ccccc2)C(=O)NC(=O)N1C	206293	nan	206293
D04983	Racemethionine (USAN); DL-Methionine (JAN); Padameth (TN)	CSCCC(N)C(=O)O	636185, 8622104, 4657270, 4657271, 4230170	C01733	636185, 8622104, 4657270, 4657271, 4230170
D04984	Methionine C 11; Carbon-11 methionine	CSCCC(N)C(=O)O	636185, 8622104, 4657270, 4657271, 4230170	C01733	636185, 8622104, 4657270, 4657271, 4230170
D04985	Methohexital (USP/INN)	C=CCC1(C(C)C#CCC)C(=O)NC(=O)N(C)C1=O	nan	C07844	C07844
D04986	Methopholine (USAN)	COc1cc2c(cc1OC)C(CCc1ccc(Cl)cc1)N(C)CC2	1552484	nan	1552484
D04988	Methyl aminolevulinate hydrochloride (USAN); Metvixia (TN)	COC(=O)CCC(=O)CN.Cl	5991317, 32483227	nan	32483227, 5991317
D04989	Methyl isobutyl ketone (NF)	CC(=O)CC(C)C	605399	C19263	605399
D04991	Methyl nicotinate (USAN); Heat spray (TN)	COC(=O)c1cccnc1	113951	nan	113951
D04992	Methyl palmoxirate (USAN)	CCCCCCCCCCCCCCC1(C(=O)OC)CO1	6060833	nan	6060833
D04999	Methylphenidate (USAN/INN); Daytrana (TN)	COC(=O)C(c1ccccc1)C1CCCCN1	200061, 5745860, 5745859	C07196	5745859, 5745860, 200061
D05004	Metiamide (USAN/INN)	CNC(=S)NCCSCc1nc[nH]c1C	884514	C07449	884514
D05010	Metopimazine (USAN/INN)	CS(=O)(=O)c1ccc2c(c1)N(CCCN1CCC(C(N)=O)CC1)c1ccccc1S2	4278585	nan	4278585
D05017	Metronidazole phosphate (USAN)	Cc1ncc([N+](=O)[O-])n1CCOP(=O)(O)O	547711	nan	547711
D05027	Midaflur (USAN/INN)	NC1=NC(C(F)(F)F)(C(F)(F)F)NC1(C(F)(F)F)C(F)(F)F	578043	nan	578043
D05030	Mifobate (USAN/INN); Clenicor (TN)	COP(=O)(OC)OC(c1ccc(Cl)cc1)P(=O)(OC)OC	5985350	nan	5985350
D05035	Milameline hydrochloride (USAN)	CON=CC1=CCCN(C)C1.Cl	14843631	nan	14843631
D05039	Minaprine (USAN/INN); Cantor (TN)	Cc1cc(-c2ccccc2)nnc1NCCN1CCOCC1	1219740	nan	1219740
D05052	Misonidazole (USAN/INN)	COCC(O)Cn1ccnc1[N+](=O)[O-]	613655	nan	613655
D05054	Mitindomide (USAN/INN)	O=C1NC(=O)C2C3C=CC(C12)C1C2C(=O)NC(=O)C2C31	761394	nan	761394
D05060	Mitratapide (USAN/INN)	CCC(C)n1ncn(-c2ccc(N3CCN(c4ccc(OCC5COC(CSc6nncn6C)(c6ccc(Cl)cc6)O5)cc4)CC3)cc2)c1=O	13788038	nan	13788038
D05072	Monobenzone (USP/INN); Benoquin (TN)	Oc1ccc(OCc2ccccc2)cc1	1958305	C14244	1958305
D05077	Moricizine (USAN); Moracizine (INN)	CCOC(=O)Nc1ccc2c(c1)N(C(=O)CCN1CCOCC1)c1ccccc1S2	nan	C07743	C07743
D05078	Morniflumate (USAN)	O=C(OCCN1CCOCC1)c1cccnc1Nc1cccc(C(F)(F)F)c1	1177797	nan	1177797
D05086	Moxnidazole (USAN/INN)	Cn1c([N+](=O)[O-])cnc1C=NN1CC(CN2CCOCC2)OC1=O	856353	nan	856353
D05087	Moxonidine (USAN/INN); Cynt (TN)	COc1nc(C)nc(Cl)c1NC1=NCCN1	6769959	C07451	6769959
D05091	Muraglitazar (USAN/INN)	COc1ccc(OC(=O)N(CC(=O)O)Cc2ccc(OCCc3nc(-c4ccccc4)oc3C)cc2)cc1	10040936	nan	10040936
D05096	Mycophenolic acid (USAN/INN); Mycophenolic acid (TN)	COc1c(C)c2c(c(O)c1CC=C(C)CCC(=O)O)C(=O)OC2	8644904	nan	8644904
D05097	Myristyl alcohol (NF)	CCCCCCCCCCCCCCO	1742652	nan	1742652
D05099	Nabilone (USAN/INN); Cesamet (TN)	CCCCCCC(C)(C)c1cc(O)c2c(c1)OC(C)(C)C1CCC(=O)CC21	20107159, 10393119	nan	20107159, 10393119
D05102	Nafenopin (USAN/INN)	CC(C)(Oc1ccc(C2CCCc3ccccc32)cc1)C(=O)O	2005820	C11371	2005820
D05103	Nafimidone hydrochloride (USAN)	Cl.O=C(Cn1ccnc1)c1ccc2ccccc2c1	4030672	nan	4030672
D05106	Nafoxidine hydrochloride (USAN)	COc1ccc2c(c1)CCC(c1ccccc1)=C2c1ccc(OCCN2CCCC2)cc1.Cl	6033589	nan	6033589
D05107	Nafronyl oxalate (USAN); Naftidrofuryl oxalate; Praxilene (TN)	CCN(CC)CCOC(=O)C(Cc1cccc2ccccc12)CC1CCCO1.O=C(O)C(=O)O	4777721	nan	4777721
D05110	Nalidixate sodium (USAN); Nalidixate sodium monohydrate	CCn1cc(C(=O)[O-])c(=O)c2ccc(C)nc21.O.[Na+]	17661200, 21500271	nan	17661200, 21500271
D05121	Naproxol (USAN/INN)	COc1ccc2cc(C(C)CO)ccc2c1	7267841, 1949164	nan	1949164, 7267841
D05124	Naxagolide hydrochloride (USAN)	CCCN1CCOC2c3cc(O)ccc3CCC21.Cl	15508179	nan	15508179
D05127	Nebivolol (USAN/INN)	OC(CNCC(O)C1CCc2cc(F)ccc2O1)C1CCc2cc(F)ccc2O1	8729344, 14517733	nan	14517733, 8729344
D05129	Nedocromil (USAN/INN)	CCCc1c2oc(C(=O)O)cc(=O)c2cc2c(=O)cc(C(=O)O)n(CC)c12	588536	C07255	588536
D05130	Nedocromil calcium (USAN)	CCCc1c2oc(C(=O)[O-])cc(=O)c2cc2c(=O)cc(C(=O)[O-])n(CC)c12.[Ca+2]	13196374	nan	13196374
D05131	Neflumozide hydrochloride (USAN)	Cl.O=c1[nH]c2ccccc2n1C1CCN(CCCc2noc3cc(F)ccc23)CC1	15193577	nan	15193577
D05133	Nefopam hydrochloride (USAN); Acupan (TN)	CN1CCOC(c2ccccc2)c2ccccc2C1.Cl	3575294	nan	3575294
D05138	Nemazoline hydrochloride (USAN)	Cl.Nc1c(Cl)cc(CC2=NCCN2)cc1Cl	11623182	nan	11623182
D05140	Framycetin (INN); Fradiomycin B; Neomycin B; FRM	NCC1OC(OC2C(CO)OC(OC3C(O)C(N)CC(N)C3OC3OC(CN)C(O)C(O)C3N)C2O)C(N)C(O)C1O	18155057	nan	18155057
D05143	Nepafenac (JAN/USAN/INN); Nevanac (TN)	NC(=O)Cc1cccc(C(=O)c2ccccc2)c1N	4256257	nan	4256257
D05145	Neramexane mesylate (USAN)	CC1(C)CC(C)(C)CC(C)(N)C1.CS(=O)(=O)O	15591877	nan	15591877
D05150	Netoglitazone (USAN/INN)	O=C1NC(=O)C(Cc2ccc3cc(OCc4ccccc4F)ccc3c2)S1	8227464	nan	8227464
D05152	Netupitant (USAN/INN)	Cc1ccccc1-c1cc(N2CCN(C)CC2)ncc1N(C)C(=O)C(C)(C)c1cc(C(F)(F)F)cc(C(F)(F)F)c1	10314678	nan	10314678
D05155	Nibroxane (USAN/INN)	CC1OCC(Br)([N+](=O)[O-])CO1	1425640	nan	1425640
D05158	Nicotinyl alcohol (USAN); Roniacol (TN)	OCc1cccnc1	107851	nan	107851
D05160	Nifuratrone (USAN/INN)	O=[N+]([O-])c1ccc(C=[N+]([O-])CCO)o1	5539738	nan	5539738
D05163	Nifurmerone (USAN/INN)	O=C(CCl)c1ccc([N+](=O)[O-])o1	161916	nan	161916
D05164	Nifurquinazol (USAN/INN)	O=[N+]([O-])c1ccc(-c2nc(N(CCO)CCO)c3ccccc3n2)o1	1092044	nan	1092044
D05167	Nifurthiazole (USAN/INN)	O=CNNc1nc(-c2ccc([N+](=O)[O-])o2)cs1	551526	C19240	551526
D05169	Nimidane (USAN/INN)	Cc1cc(Cl)ccc1N=C1SCS1	13266045	nan	13266045
D05170	Niridazole (USAN/INN)	O=C1NCCN1c1ncc([N+](=O)[O-])s1	665338	C19268	665338
D05173	Nisoxetine (USAN/INN)	CNCCC(Oc1ccccc1OC)c1ccccc1	2946689	nan	2946689
D05175	Nitarsone (USAN/INN)	O=[N+]([O-])c1ccc([As](=O)(O)O)cc1	2939908	nan	2939908
D05176	Nithiamide (USAN); Aminitrozole (INN)	CC(=O)Nc1ncc([N+](=O)[O-])s1	167361	nan	167361
D05177	Nitisinone (JAN/USAN/INN); Orfadin (TN)	O=C1CCCC(=O)C1C(=O)c1ccc(C(F)(F)F)cc1[N+](=O)[O-]	8639943	nan	8639943
D05178	Nitrafudam hydrochloride (USAN)	Cl.N=C(N)c1ccc(-c2ccccc2[N+](=O)[O-])o1	6250206	nan	6250206
D05180	Nitramisole hydrochloride (USAN)	Cl.O=[N+]([O-])c1cccc(C2CN3CCSC3=N2)c1	13275963	nan	13275963
D05191	Nitromide (USAN)	NC(=O)c1cc([N+](=O)[O-])cc([N+](=O)[O-])c1	1981935	nan	1981935
D05193	Nitroscanate (USAN/INN)	O=[N+]([O-])c1ccc(Oc2ccc(N=C=S)cc2)cc1	888706	nan	888706
D05196	Noberastine (USAN/INN)	Cc1ccc(Cn2c(NC3CCNCC3)nc3cccnc32)o1	13247685	nan	13247685
D05197	Nocodazole (USAN/INN)	COC(=O)Nc1nc2cc(C(=O)c3cccs3)ccc2[nH]1	1085978	C13719	1085978
D05203	Noracymethadol hydrochloride (USAN)	CCC(OC(C)=O)C(CC(C)NC)(c1ccccc1)c1ccccc1.Cl	6550394	nan	6550394
D05208	Norflurane (USAN/INN)	FCC(F)(F)F	1733199, 7913831	nan	7913831, 1733199
D05211	Nufenoxole (USAN/INN)	Cc1nnc(C(CCN2CC3CCC2CC3)(c2ccccc2)c2ccccc2)o1	939075	nan	939075
D05219	Ocrylate (USAN/INN)	C=C(C#N)C(=O)OCCCCCCCC	11343091	nan	11343091
D05220	Octanoic acid (USAN/INN); Caprylic acid (NF)	CCCCCCCC(=O)O	1747180	C06423	1747180
D05221	Octazamide (USAN/INN)	O=C(c1ccccc1)N1CC2COCC2C1	781620	nan	781620
D05224	Octicizer (USAN)	CCCCC(CC)COP(=O)(Oc1ccccc1)Oc1ccccc1	2568983	nan	2568983
D05225	Octinoxate (USP/INN); Octyl methoxycinnamate; Parsol (TN)	CCCCC(CC)COC(=O)C=Cc1ccc(OC)cc1	5946632	nan	5946632
D05226	Octisalate (USP/INN); Octyl salicylate; Uvinul (TN)	CCCCC(CC)COC(=O)c1ccccc1O	2730664	nan	2730664
D05227	Octocrylene (USP); Octocrilene (INN)	CCCCC(CC)COC(=O)C(C#N)=C(c1ccccc1)c1ccccc1	9939672	nan	9939672
D05228	Octodrine (USAN/INN)	CC(C)CCCC(C)N	1209250	nan	1209250
D05232	Octrizole (USAN/INN)	CC(C)(C)CC(C)(C)c1ccc(O)c(-n2nc3ccccc3n2)c1	623873	nan	623873
D05234	Ofornine (USAN/INN)	O=C(c1ccccc1Nc1ccncc1)N1CCCCC1	13417012	nan	13417012
D05245	Oleyl alcohol (NF); Witcohol 85 (TN)	CCCCCCCCC=CCCCCCCCCO	1365020	nan	1365020
D05246	Olmesartan (USAN/INN)	CCCc1nc(C(C)(C)O)c(C(=O)O)n1Cc1ccc(-c2ccccc2-c2nnn[nH]2)cc1	7502669	C21543	7502669
D05261	Omeprazole sodium injection (JAN); Omeprazole sodium hydrate; Omepral (TN)	COc1ccc2[n-]c(S(=O)Cc3ncc(C)c(OC)c3C)nc2c1.O.[Na+]	31012423, 15418006	nan	15418006, 31012423
D05273	Ormetoprim (USAN/INN)	COc1cc(C)c(Cc2cnc(N)nc2N)cc1OC	760209	nan	760209
D05274	Ornidazole (USAN/INN)	Cc1ncc([N+](=O)[O-])n1CC(O)CCl	614299	nan	614299
D05278	Oxagrelate (USAN/INN)	CCOC(=O)c1c(C)cc2c(CO)n[nH]c(=O)c2c1C	811823	nan	811823
D05281	Oxamisole hydrochloride (USAN)	COC1(OC)CCCN2CC(c3ccccc3)N=C21.Cl	13408974	nan	13408974
D05291	Oxfendazole (USP/INN); Synanthic [veterinary] (TN)	COC(=O)Nc1nc2cc(S(=O)c3ccccc3)ccc2[nH]1	761290	C21882	761290
D05292	Oxfenicine (USAN/INN)	NC(C(=O)O)c1ccc(O)cc1	6056393, 513130	nan	6056393, 513130
D05293	Oxibendazole (USAN/INN); Anthelcide EQ (TN)	CCCOc1ccc2[nH]c(NC(=O)OC)nc2c1	666885	nan	666885
D05294	Oxidopamine (USAN/INN)	NCCc1cc(O)c(O)cc1O	2211011	nan	2211011
D05296	Oxidronic acid (USAN)	O=P(O)(O)C(O)P(=O)(O)O	1872751	nan	1872751
D05298	Oxifungin hydrochloride (USAN)	Cl.c1ccc(OCC2=Nc3cnccc3NN2)cc1	4040530	nan	4040530
D05305	Oxisuran (USAN/INN)	CS(=O)CC(=O)c1ccccn1	1526159	nan	1526159
D05309	Oxybenzone (USP/INN); Uvinul 40 (TN)	COc1ccc(C(=O)c2ccccc2)c(O)c1	1913145	C14285	1913145
D05312	Oxycodone (USAN/INN)	COc1ccc2c3c1OC1C(=O)CCC4(O)C(C2)N(C)CCC314	102257	nan	102257
D05320	Oxyphenisatin acetate (USAN); Isocrin (TN)	CC(=O)Oc1ccc(C2(c3ccc(OC(C)=O)cc3)C(=O)Nc3ccccc32)cc1	353200	nan	353200
D05321	Oxyquinoline (USAN)	Oc1cccc2cccnc12	114512	C19434	114512
D05334	Padimate A (USAN); Padimate (INN)	CCCCCOC(=O)c1ccc(N(C)C)cc1	9910695	nan	9910695
D05335	Padimate O (USP); Arlatone UVB (TN)	CCCCC(CC)COC(=O)c1ccc(N(C)C)cc1	5946517	nan	5946517
D05339	Paliperidone (JAN/USP/INN); Invega (TN)	Cc1nc2n(c(=O)c1CCN1CCC(c3noc4cc(F)ccc34)CC1)CCCC2O	8808385	C21516	8808385
D05340	Paliperidone palmitate (JAN/USAN); Xeplion (TN); Trevicta (TN)	CCCCCCCCCCCCCCCC(=O)OC1CCCn2c1nc(C)c(CCN1CCC(c3noc4cc(F)ccc34)CC1)c2=O	15026585	nan	15026585
D05341	Palmitic acid (NF)	CCCCCCCCCCCCCCCC(=O)O	607489	C00249	607489
D05346	Panadiplon (USAN/INN)	CC(C)n1c(=O)c2c(-c3noc(C4CC4)n3)ncn2c2ccccc21	7496156	nan	7496156
D05353	Pantoprazole (USAN/INN)	COc1ccnc(CS(=O)c2nc3cc(OC(F)F)ccc3[nH]2)c1OC	5361474	C11806	5361474
D05360	Parapenzolate bromide (USAN/INN)	C[N+]1(C)CCC(OC(=O)C(O)(c2ccccc2)c2ccccc2)CC1.[Br-]	3823870	nan	3823870
D05365	Parbendazole (USAN/INN)	CCCCc1ccc2[nH]c(NC(=O)OC)nc2c1	751212	nan	751212
D05367	Parconazole hydrochloride (USAN)	C#CCOCC1COC(Cn2ccnc2)(c2ccc(Cl)cc2Cl)O1.Cl	13285272	nan	13285272
D05374	Paroxetine hydrochloride (USP); Paxil (TN)	Cl.Fc1ccc(C2CCNCC2COc2ccc3c(c2)OCO3)cc1	6884443	nan	6884443
D05378	Pazinaclone (USAN/INN)	O=C(CC1c2ccccc2C(=O)N1c1ccc2ccc(Cl)nc2n1)N1CCC2(CC1)OCCO2	7555341	nan	7555341
D05380	Pazopanib hydrochloride (JAN/USAN); Votrient (TN)	Cc1ccc(Nc2nccc(N(C)c3ccc4c(C)n(C)nc4c3)n2)cc1S(N)(=O)=O.Cl	21461344, 11572612, 21516231	nan	21516231, 11572612, 21461344
D05396	Peldesine (USAN)	Nc1nc2c(Cc3cccnc3)c[nH]c2c(=O)[nH]1	5874468	nan	5874468
D05404	Pemedolac (USAN/INN)	CCC1(CC(=O)O)OCC(Cc2ccccc2)c2c1[nH]c1ccccc21	13484121	nan	13484121
D05407	Penciclovir (USAN/INN); Denavir (TN)	Nc1nc(=O)c2ncn(CCC(CO)CO)c2[nH]1	9928531	C07417	9928531
D05411	Penicillin V (USP); Phenoxymethylpenicillin (INN); PCV; V-Cillin (TN)	CC1(C)SC2C(NC(=O)COc3ccccc3)C(=O)N2C1C(=O)O	629176	nan	629176
D05422	Pentetic acid (USP/INN)	O=C(O)CN(CCN(CC(=O)O)CC(=O)O)CCN(CC(=O)O)CC(=O)O	1810219	nan	1810219
D05430	Pentrinitrol (USAN); Petrin (TN)	O=[N+]([O-])OCC(CO)(CO[N+](=O)[O-])CO[N+](=O)[O-]	1803973	nan	1803973
D05436	Perflenapent (USAN/INN); Dodecafluoropentane; Perfluoropentane	FC(F)(F)C(F)(F)C(F)(F)C(F)(F)C(F)(F)F	1712388	nan	1712388
D05437	Perflexane (USAN/INN)	FC(F)(F)C(F)(F)C(F)(F)C(F)(F)C(F)(F)C(F)(F)F	1802113	nan	1802113
D05438	Perflisopent (USAN/INN)	FC(F)(F)C(F)(F)C(F)(C(F)(F)F)C(F)(F)F	1793149	nan	1793149
D05439	Perflubron (USP/INN); Imagent (TN)	FC(F)(F)C(F)(F)C(F)(F)C(F)(F)C(F)(F)C(F)(F)C(F)(F)C(F)(F)Br	2016022	nan	2016022
D05440	Perflubutane (JAN/USAN/INN); Sonazoid (TN)	FC(F)(F)C(F)(F)C(F)(F)C(F)(F)F	1777513	nan	1777513
[truncated: 1,747 more rows]

## Sheet: Drug synthesis expected cost
Chem env.	Bio env.	Hybrid env.
101.435	101.405	1.56365
100.115	100.062	10.9054
100.402	10.6428	100.106
100.465	100.465	1.88791
132.589	100.087	2.07787
100.09	20.8136	100.045
100.418	100.418	1.84079
100.583	100.476	100.901
111.903	200.62	1.32515
100.655	101.314	2.14125
42.2719	100.101	100.446
101.606	101.621	101.608
100.185	100.721	100.185
100.272	100.207	1.42591
100.814	100.814	100.814
201.284	100.719	100.719
100.232	10.0737	100.238
100.011	100	10.8479
100.787	101.003	101.003
100	100	100.594
100	201.739	10.1051
200.921	100.298	100.323
111.768	10.718	1.03252
100.395	100.395	10.9372
100.498	100.498	100.498
100.093	100.093	100.093
100.114	222.941	100.61
100.397	100.397	100.446
100.146	100.146	101.12
100.465	100.465	1.88791
100	100	100.909
202.014	101.595	101.595
100	201.739	10.1051
100.554	201.739	10.0397
100	100	100
100.451	100.451	100.451
100.286	100.286	100.121
100.087	100.094	100.087
100.837	100.418	1.84079
100.258	100.01	1.23197
112.756	100	21.7435
201.517	100.722	100.88
202.038	101.589	101.747
100.688	100.688	1.43949
201.752	100.652	100.742
100.005	100	100.005
100.33	100	100.33
33.5567	11.5122	101.594
101.036	100.105	100.096
100.4	20.8132	100.4
100.693	100.693	100.693
100.381	100.381	100.381
102.444	101.611	12.2339
100.01	100.01	100.01
100.448	100.215	2.61166
111.088	100.533	100.7
100.898	11.1802	1.37946
100.395	100.395	1.42591
100.336	100.213	1.3584
100.308	101.19	1.94767
100	100	100
100.465	100.465	1.88791
100.061	100.061	100.026
122.424	100.155	1.2438
101.101	101.101	101.101
100.764	10.2085	10.3083
202.454	101.394	102.207
100.31	100.31	100.24
100.113	10.1354	10.3584
100.393	10.5034	1.13914
100.61	110.726	100.923
100.286	100.286	100.173
100.013	100.013	100.013
100	100	100
100.769	100.769	100.769
112.398	100.019	1.50371
101.5	101.5	101.5
112.356	32.7316	102.341
100	10.0904	100
100.066	100.066	10.793
100.465	100.465	1.88791
100	100	100.51
100.094	10.1255	100.012
101.036	100.105	100.096
100.465	100.465	1.88791
100.065	100.005	100.061
100.187	10.1654	10.3929
100	100	100
100	100	1.03081
101.006	100.514	100.937
100.108	100.035	10.2047
113.454	100.014	100.014
201.197	10.4091	10.9865
100.658	100.215	1.52458
100.042	10.2955	100
20.675	100.052	1.20253
25.753	22.0668	100.776
100.073	100.465	1.88791
100.108	100.207	1.42591
101.478	101.478	101.478
100.897	100.897	100.897
100.073	10.1717	10.5408
101.666	101.184	1.16029
100.081	100.081	100.081
100.693	100.693	100.693
100	100	100.796
100.258	100.01	100.569
100.303	101.185	1.33416
201.059	100.49	1.19427
102.24	100.624	1.74907
100.395	100.395	1.38592
100.042	100.105	100.105
100.387	100.387	1.38455
100.365	10.4434	100.365
201.117	211.358	101.077
100.072	100.081	100.111
100.044	100.311	10.4842
100.575	100.575	100.575
100.021	10.5402	100.021
201.878	100.2	1.32084
100.184	100.092	100.134
98.24	100.594	1.79183
100.629	10.8267	101
100.06	100.06	100.06
100.051	100.103	100.051
100.012	100.013	100.112
100.021	10.2699	10.0992
100.188	100.081	100.081
100.395	100.108	1.42591
100.245	100.006	1.07672
100	100.099	10.2159
100.094	200.484	101.506
101.094	100.094	2.14268
100	100	100
100.016	100.016	1.25227
256.809	12.3439	3.664
100.071	111.218	100.258
100.215	100.215	100.215
100.321	100.047	1.17957
100.139	100.139	11.0878
100.064	100.077	100.095
103.014	100.052	1.20253
100.781	100.781	100.781
212.491	10.5402	100.007
100.324	110.654	100.324
100.168	100.168	100.168
100.776	110.481	100
131.927	100.69	1.13266
101.039	211.554	1.12305
100.122	100.122	100.122
100.172	100.048	10.1798
100.583	100.568	100.352
111.742	200.776	100.792
100.368	100.126	100.368
100.627	102.784	2.72435
102.371	11.084	1.51115
154.676	100.157	100.157
100.249	20.9648	100.083
100.474	100.141	10.6794
100.604	100.604	100.604
201.392	100.465	1.88791
100.62	100.62	100.62
100.07	20.9636	100.802
100.137	100.475	10.586
100.814	100.009	100.704
200.81	100.905	101.087
100.121	100.173	100.121
100.465	100.465	1.88791
100.061	100.735	100.297
100.254	111.739	100.254
100.447	100.02	100
100.964	11.0673	100.901
100.603	100.013	11.4244
101.242	101.211	100.428
100.429	11.3501	1.2461
100	100	100
100.054	100.103	100.038
100.073	100.465	1.88791
154.545	100	1.22327
100.688	21.1277	100.122
100.38	100.38	1.41072
101.648	101.648	101.648
122.615	100.026	1.93813
100	100.286	100.841
100.145	100.915	100.915
100.807	100.833	1.17482
100.029	10.7551	100.029
100.675	100.675	100.675
100.814	100.814	100.814
201.723	111.579	102.27
101.481	100.011	1.46456
100.307	100.307	100.307
100.298	10.1649	100.298
100.555	100.016	11.2408
112.448	101.556	2.51287
200.831	100.087	100.065
100.561	100.882	1.04115
100.084	100.084	10.2533
100.448	100.395	1.42591
100.184	100.092	100.184
202.239	202.473	102.962
100.067	10.3774	100.067
100.797	100.763	100.786
100.668	100.668	100.668
100.545	111.712	100.545
100.784	100	100.094
202.403	100.9	100.9
100.278	10.4248	11.6382
100.486	100.588	1.27507
100.117	100.117	100.802
201.64	20.7857	100.084
202.882	202.235	201.496
100.735	100.178	100.262
100.587	100.587	100.587
100.527	100.188	100.188
100	10.099	100
100.019	100	100.019
100.028	100	100.028
100.052	100.052	100.082
100.201	100.201	100
100.094	100.094	100.094
101.036	100.465	1.88791
201.066	100.626	100.793
101.061	100.008	1.34286
100	100	100
100.136	100.136	100.136
23.4288	100.837	1.67271
111.135	100.492	100.492
100.643	100.643	100.643
100.552	100.011	1.25056
202.024	101.384	101.666
213.466	100.272	10.6563
201.234	100.667	100.834
101.14	100.882	1.04115
100.787	100.787	100.787
100.784	100.784	100.784
100.606	100.157	1.20351
100.578	10.216	100.89
24.2597	100	1.48998
100.465	100.465	1.88791
100.586	100.586	100.586
100.196	10.7588	100.196
158.982	10.2225	100.868
100.053	22.8811	2.30855
100.397	100.446	100.446
100.036	100.036	201.364
101.381	100.024	100.024
256.078	200.008	103.113
100.15	100.252	100.15
100.357	100.081	100.2
100.475	100.475	10.8652
100.273	100.252	100.15
100.167	10.4862	10.2865
202.594	101.38	1.83033
201.873	111.102	100.899
111.808	100.179	100.439
200.702	100.004	100.436
101.006	101.286	2.20001
100.412	100.005	12.1391
100.857	100.465	1.88791
100.094	100	100.013
100.37	100.37	100.37
100	100	100
100.5	110.999	100.519
100.028	200.588	100.028
100.858	101.043	1.35949
100.156	100.156	100.213
100.834	100.834	100.834
101.1	100.875	100.875
203.197	101.839	102.309
101.528	113.08	1.97746
101.995	10.1313	1.35081
100	100	100
112.346	201.739	10.1104
100.318	100.139	100.973
100.078	100	10.2126
100.429	10.7586	1.56055
201.498	200.776	100.084
100.128	100.902	100.128
100.355	100.355	1.38592
100.985	100.099	101.014
100.735	10.5315	100.418
200.856	200.752	100.895
100.183	100.116	100.126
202.17	201.268	1.89552
100.008	100	2.40343
100.512	110.87	100.083
100.175	20.7913	2.93775
100.395	100.395	1.42591
100.523	100.139	1.2775
100.188	100.188	100.188
100.077	100.077	102.124
100	100	100.021
100.146	100.103	1.08304
200.776	201.539	101.254
173.873	202.033	100.038
100.073	100.073	100.073
101.482	100.103	1.08304
100.545	100.545	100.545
100.408	201.739	10.1051
100.105	110.668	100.15
100	100.078	100.312
112.289	12.1204	1.37737
33.2201	1.14082	1.04531
101.65	101.448	2.20562
100.631	100.188	10.5565
100.416	10.2085	100.386
202.242	21.9733	1.5183
100.787	100.787	100.787
100.222	100.213	10.8765
100.814	100.814	100.814
100.604	100.604	100.604
215.128	101.894	100.57
100.98	100.119	1.00561
100	100	100
100.795	100.058	10.5732
100.022	110.376	100.022
100.465	100.081	1.88791
100.135	100.135	100.144
100.095	100.095	100.386
100.002	100.002	11.5791
100.595	100.595	100.595
101.16	10.2691	10.5876
101.497	100.456	1.00097
100.002	100.002	100.002
100.656	100.656	100.656
100.911	122.189	100.911
100.233	10.3418	1.18039
100.044	200.376	100.044
121.978	200.869	21.093
213.645	100	1.42241
100.264	100.146	1.54664
200.868	200.868	200.868
100.047	100.047	100.047
100.308	100.308	100.308
100.681	100.202	100.681
41.4401	20.2711	20.7228
100	100	100
100.068	100.178	100.273
122.122	100.087	1.97145
101.18	10.643	1.01928
100.465	100.465	1.88791
100.018	100	100
204.089	213.664	101.341
100.013	100.155	100.013
100.024	100.024	100.024
201.557	201.557	201.557
145.219	10.2656	100.22
111.684	100.169	1.02419
100.465	100.465	1.88791
100.121	100.286	100.173
100	100	100
100.814	100.814	100.814
100.616	100.475	100.009
100.55	100.395	1.42591
100.059	10.2955	100
100.904	101.225	1.98241
100.125	100.125	10.8106
100.343	101.225	1.98241
22.2484	202.622	1.63233
100.809	10.1255	100.048
100.007	100.068	100.007
200.54	100.452	100.718
100.187	100.187	100.277
100	100.099	10.2631
101.441	101.286	2.20001
100.494	100.559	1.42591
100.102	100.102	100.102
100.162	100.337	100.054
100.498	100.498	100.498
100	100	100
100.465	100.465	1.88791
100.477	100.111	3.01395
100.499	100.499	100.798
100.033	100	100.033
100	100	100
110.082	110.082	100.416
100	100	100
100	100	100.242
111.559	10.6428	100.402
100.038	10.2507	100.039
100	100	100.072
100.455	100.455	100.455
100.013	100.214	100.899
100.603	100.603	1.63414
100.218	10.1525	10.1188
100.555	100.418	1.84079
101.012	111.712	10.0352
100.103	100.103	100.146
100.719	112.256	11.7124
112.074	112.141	102.124
201.976	101.462	100.937
112.524	100.107	2.13626
201.048	101.121	101.739
100.029	200.793	1.78502
152.424	110.535	101.426
100.855	100.855	100.855
100.273	100.137	100.141
20.1475	20.9519	12.299
100.677	100.323	100.069
100.374	100.374	100.374
101.313	100.048	1.13244
200.231	200.231	100.857
100.901	122.727	100.901
78.891	101.132	1.77041
100.465	100.465	1.88791
100	100	100
235.292	100.584	2.03727
101.354	100.862	100.483
101.523	100.244	1.51428
100.903	100.903	100.903
100.496	100.01	100.189
100.097	10.0521	100.025
201.608	100.035	100.035
100.792	100.31	100.201
244.574	10.2882	10.2882
100.275	100.337	100.275
100.1	100.532	100.532
100.115	21.0111	100.045
100.455	100.069	100.455
225.55	100.091	100.045
100.418	100.067	1.84079
200.893	101.357	200.893
100.566	101.286	2.20001
100	100	100
201.121	111.002	201.125
100.425	100.425	100.425
100.017	100.012	100.023
100.261	100.021	11.7399
100.67	100.67	100.67
111.245	100.066	100.066
101.02	100.465	1.88791
111.937	101.073	1.36834
100.497	10.6566	10.5926
111.14	110.81	101.096
111.256	21.9646	1.81686
100.041	100	100.041
101.289	100.401	1.05136
100	100	100
122.41	31.1834	101.468
201.068	100.501	100.883
100.015	200.786	100.107
100.017	10.6699	100.017
100.08	10.055	100.08
100.286	100.286	100.173
100.643	100.643	100.643
100.908	122.791	100.921
100.159	100.135	100.361
100.34	100.34	100.34
100.105	100.105	2.20001
21.2511	100.066	100.066
100	100	100
100.216	100.216	100.543
100.667	20.0934	100.233
100.459	100.01	1.23505
20.7594	10.2578	110.446
100.544	100.503	100.503
100.828	100.465	1.88791
100	100	100
100.065	100.065	100.004
100.12	21.0878	100.688
100.64	100.827	100.64
100.418	100.418	1.84079
100	100.774	100
100.796	100.796	100.796
100.503	100.395	1.42591
100.084	100.127	100.78
100.087	100.106	100.521
201.583	101.462	102.08
100.055	200.805	100.511
100.067	10.3774	100.067
100.675	100.675	100.675
144.681	10.5744	100.846
100.254	100	100.34
100.021	21.9703	100.018
100.196	10.1649	100.196
100.011	100.011	1.25056
100	100.004	100
100.614	100.226	10.9537
113.486	100.474	1.3861
100.292	100.273	100.292
100.402	10.548	100.402
100.634	201.128	103.713
100.052	100.052	100.052
100.48	100.01	1.24405
100.51	10.548	100.402
100.79	100.735	100.79
112.212	1.50083	1.00139
100.061	10.2213	100.056
100.015	100.016	100.015
100.263	100.159	1.78568
201.264	110.469	1.54202
110.702	200.264	100.087
100.007	100.007	100.007
201.588	112.678	1.55789
100.138	100.353	100.138
100.681	100.21	100.201
100.432	10.4737	10.376
100.849	21.2863	100.113
212.627	212.138	101.535
101.023	100.135	100.789
100	100	100
143.51	100	100.434
100.169	100	100
200.938	100.943	2.11242
100.081	100.081	1.19843
100.005	100.005	100.109
100.441	100.441	10.8347
100.395	100.395	1.42591
258.825	100.015	1.35623
100	100	1.03081
100.575	100.575	100.575
213.065	100.226	103.245
100.72	10.2203	10.3929
201.102	200.538	1.4856
100.779	100.779	100.779
100.523	100.087	1.58624
100.073	100.073	10.586
100.229	100.121	10.9784
134.403	100.178	100.262
100.333	100.333	100.333
100.002	100.004	100.002
100.086	100.086	100.086
21.129	100.047	1.46455
100	100	100
100.468	10.2031	100.848
101.308	100.347	1.19725
100.256	100.256	100.256
100.059	100.007	100.141
100.502	100.472	100.472
100.128	100	1.42241
101.48	101.48	101.48
100.454	100	100.454
100.013	100.013	3.50432
100.809	100.331	10.9382
100.067	10.0707	10.6468
100	100	100
100	100	100
100.442	100.442	100.442
201.6	32.4141	3.12779
201.002	100.456	100.614
100.159	100.503	1.42591
100.599	100.599	1.94558
100.467	100.148	1.1671
100.806	100.806	100.806
100.201	100.931	100.105
100.789	100.789	100.789
100.099	100.311	100.236
100.157	100.666	100.176
100.079	10.7057	100.389
200.364	100.346	100.894
100.273	100.215	1.52458
100.009	100.465	1.88791
100.05	100.05	100.05
100.83	100.83	100.83
100.376	100.376	100.376
100.721	100.561	100.561
100.043	10.1517	10.6286
110.816	100.213	10.2278
100.041	100	100.041
101.316	11.1147	1.40562
111.962	100.118	11.7749
100	201.739	10.1051
201.364	200.529	100.979
100.085	100.085	10.4622
232.837	100.75	100.75
100.007	100.007	100.007
100.095	100.095	100.095
20.7273	100.111	1.26916
100.888	123.62	100.888
112.271	123.279	1.92443
100.131	100.131	100.123
201.213	100	100.377
100.358	100.358	100.358
164.26	110.87	100.087
100.897	201.462	1.06892
100.04	100.081	100.081
100.1	100.1	100.1
100.449	100.449	1.87143
100.758	21.9892	11.3586
100.652	100.047	1.17924
100	100	100
100.235	100	1.08338
100.071	100.071	100.071
100.402	100.207	1.42591
100.21	100.056	100.37
100.161	100.082	100.082
121.895	110.796	100.138
100.791	100.791	100.791
100.195	110.677	100.813
100	100.882	1.04115
100.95	100.964	1.39491
101.233	1.16439	1.16439
100	100	100
100.071	200.793	1.78502
100	100	100
100.03	100.01	1.23505
100.017	100.017	100.002
100.071	11.0673	100.119
100.651	100.695	100.651
100.052	100.286	100.052
201.125	100.562	100.72
100.214	100.214	100.214
201.073	100.588	1.27507
101.119	100.01	1.23505
100.418	100.418	1.84079
201.637	200.19	200.19
112.018	21.8844	100.776
100	10.5289	1.51739
133.902	111.817	1.70483
201.158	110.796	11.1569
112.077	100.357	100.357
100.465	100.465	1.88791
100	100	100
101.038	100.103	100.054
100.159	100	1.0365
201.195	100.308	100.731
200.98	100.539	100.697
100.4	100.4	100.381
100.303	100.303	1.72576
101.534	100.418	1.84079
100.03	100.03	101.909
100.092	100.966	1.28034
100.612	100.612	100.612
100	100	100
131.911	201.511	3.41967
100.031	100.031	100.031
100.605	201.929	111.322
112.619	101.667	2.53063
100.012	100.089	10.251
100.3	10.4623	21.5121
100	100	100
100.566	202.205	10.6471
101.3	100	100.191
100.183	100.113	100.183
100.753	10.4623	21.5121
100.045	100.04	10.0456
100	100	100
100.25	100.15	100.474
100.665	221.977	112.134
101.031	102.456	2.82422
100.087	100.013	100.619
100.475	100.465	10.6708
201.34	100	100
100.03	100.03	12.4652
100	100	100
100.023	100.023	100.023
200.829	100.215	100.102
200.868	101.05	200.414
100.002	100.004	100.002
100.415	100.404	100.404
100	100	100
100.498	100.498	100.498
100.013	100.192	100.013
100.049	100.1	100.047
100	100	100
101.43	100.684	1.41884
101.068	202.163	1.76276
101.388	100	100.611
102.197	10.4623	21.5121
100.036	100.008	100.036
143.448	41.6325	2.41051
100.429	10.1458	10.2628
100.005	100.005	100.447
201.369	202.027	2.12682
100.585	100.459	100.04
100.19	100.19	100.19
100.311	100.242	100.311
100.123	100	100.123
100.395	100.395	1.42591
100	100	100
100.282	100.092	100.281
100.058	100.058	100.058
100.831	23.7378	1.32325
100.004	100.004	100.017
100.201	100.201	100.201
101.569	101.569	101.569
100.053	100.395	1.42591
201.058	100.585	100.326
100.223	100.16	100.292
100.828	100.073	10.6708
100.201	100.201	100
100.995	100	100.007
100	100	100.64
134.543	100.384	1.59511
100.566	100.566	100.566
100.084	100.087	1.49491
100.775	101.012	100.775
134.931	211.388	1.79558
100.434	100.434	100.495
100.425	100.425	1.84782
100.322	100.139	100.139
100.183	100	100.183
110.935	200.787	3.1879
202.139	202.47	101.504
100.222	100.261	100.222
100.517	100.517	100.517
112.26	11.1376	2.58155
201.387	30.9296	1.23946
100.103	100.103	1.16754
100.547	100.465	1.88791
100.512	11.0262	12.3751
212.476	100.911	101.528
202.392	21.2258	1.05404
100.646	100	100.231
100.028	100.028	100.028
101.653	101.118	2.21756
100.055	100.055	100.055
100.064	20.9633	100.031
200.86	101.017	101.635
100.447	100.395	1.42591
123.559	110.211	100.638
100.434	100.395	1.42591
100.12	101.125	101.1
100.013	100.236	10.9604
200	200	200
100.765	100.765	100.765
211.92	200.805	101.036
122.531	10.1254	10.1859
101.498	11.0673	1.01271
100.738	100.738	100.738
100	100	100
100.716	100.716	100.716
100.958	101.025	1.32084
101.123	101.123	100.616
111.53	100.162	1.15612
200.954	23.9458	7.11141
100.123	100	100.123
100.053	100.007	100.525
100.451	100.395	10.8984
100.289	100.009	100.283
156.694	100.121	2.46041
100.357	100.052	1.26546
100.438	100.438	100.438
100.252	100.011	1.67856
100.006	100.006	100.006
100.377	100.377	100.377
100.036	201.739	10.0713
100.616	100.616	100.616
100.004	100.091	100.091
31.4111	21.2547	10.9856
100.337	100.337	100.337
100.343	100.054	100.343
100.187	10.3077	100.11
100.781	100.781	100.781
100.08	10.1553	10.1506
100.036	20.957	100.036
100.013	100.013	100.013
200.952	201.162	100.551
100.441	100.441	100.441
100.061	100.061	100.06
100.122	100.122	100.122
100.039	10.1252	100.039
101.291	100.026	101.313
100.355	100.355	1.38592
100	100	100.02
100.465	100.465	1.88791
100.046	100.046	100.043
20.846	20.3218	100.419
100.509	100.509	100.509
100	100	100
100.231	100	10.6458
100.084	100.084	100.084
34.0329	100.017	1.11302
100.095	100.103	100.146
100.52	10.1529	100.384
100.138	100.138	100.137
100.789	100.465	1.88791
100.719	100.459	100.303
20.4786	10.2031	100.848
101.457	10.7869	1.40437
22.1382	10.2691	10.5876
100.444	100.213	10.8765
100.696	100.696	100.696
100.156	112.394	100.026
100.103	100.103	1.08304
111.171	111.008	1.70881
202.418	110.281	100.708
200.811	21.923	11.3948
100.055	10.1816	100.055
100.508	10.6358	10.5204
131.504	100.974	101.058
100.439	100.72	1.6336
100.024	21.0695	100.024
100.016	100.016	100.348
112.01	100.101	100.474
101.402	101.402	101.402
100	100.216	100
100.472	100.474	100.47
100.022	110.793	100.022
100	100	100.052
101.138	11.0886	1.44404
112.771	100.51	100.51
214.027	200.061	3.51409
100.465	101.348	2.1047
100.245	100.116	100.13
112.926	10.2031	100.848
201.177	101	1.88331
201.767	100.897	101.51
202.734	100.499	101.221
100.661	100.207	1.42591
100.34	100.629	10.4076
100.476	100.476	100.476
100.395	100.395	1.42591
100.052	100.052	1.26546
100.752	111.739	100.752
100	100	100
100.003	100.003	100.809
100.815	101.636	1.26407
224.498	100.157	1.11261
122.377	100.078	100.003
200.784	201.114	100.778
201.415	101.102	2.86026
100.193	100.013	100.013
100.258	100.01	1.23197
100.509	100.488	100.488
100.005	100.005	100.22
247.234	202.204	2.43729
100.877	11.1345	101.557
202.101	31.0896	2.12184
101.363	101.029	2.5253
100.52	100.52	100.52
100.392	100.323	10.3653
100.09	100.21	100.09
211.875	112.163	1.45511
111.012	111.362	100
100.465	100.465	1.88791
100.323	100.492	1.84079
235.339	12.0279	1.65649
100.446	100.061	100.583
100.088	10.6509	100.825
100.465	100.465	1.88791
100.798	100	100.599
101.097	101.033	1.98618
200.345	200.345	200.345
100.53	100.058	100.058
100.898	122.182	100.898
111.599	110.539	11.7678
100.731	100.731	100.731
101.428	10.2203	10.3929
100.814	100.814	100.814
101.343	100	1.56151
100	100	100
100.059	100.01	1.23197
113.228	11.382	1.06322
100.395	100.395	1.42591
100.051	100.051	100.051
200.654	200.132	101.308
101.006	100.099	101.022
200.796	200.369	100.369
100.775	100.634	100.634
100.494	100.395	1.42591
100.603	100.118	2.14268
100.121	100.081	1.34885
100.161	10.544	100.161
100.068	100.08	100.068
100.011	100.011	100.011
100.053	10.1654	100.958
201.378	100.01	1.23505
102.356	102.295	2.13571
21.4784	100.011	1.65199
100	100	100
100.204	10.2316	10.3264
100.051	100.014	100.051
268.746	225.856	1.81857
100.197	100.197	100.197
100.36	10.6041	100.36
100	100.742	100
100.355	100.355	1.38592
100.884	100.465	1.88791
100.337	100.337	100.299
100.01	100.01	100.01
100.105	100.006	100.105
122.047	100.814	100.241
100.78	100.418	1.84079
100.511	300.635	100
100.039	110.749	100.039
100.004	100.004	100.004
100.237	100.337	100.237
100.051	100.103	100.051
200.779	200.049	102.613
100.763	100.01	201.273
22.7937	200.787	2.87638
100.502	101.002	101.384
100.225	100.225	100.225
213.224	200.869	100.143
100.177	100.315	100.382
100.009	100.009	100.009
154.617	12.857	1.91527
122.35	100.104	100.007
113.051	100.141	1.88791
100.004	100.004	100.004
22.0297	100.118	2.03972
100.763	10.4623	21.5121
100.063	10.1261	100.313
200.824	201.587	101.302
201.049	211.502	110.782
100.291	100.056	10.2987
101.038	101.229	2.14268
100.051	100.051	100.051
31.5642	101.015	2.85231
100.372	10.2309	100.069
100.244	10.8945	100.244
100.633	111.314	1.66143
110.54	100.5	100.5
100.587	100.587	100.557
101.012	111.712	10.0352
100.277	100.277	1.88523
100.764	100.418	1.84079
200.69	100.917	101.534
100.004	100.004	100.004
100.689	100.689	100.689
100.182	100.127	100.58
100.123	100.111	100.123
100.311	10.2203	10.2987
100.153	100.153	1.05248
100.342	10.2283	100.384
100.204	100.204	100.204
100.009	100.009	100.009
100.088	100.088	100.088
100	100	100
100.162	10.1125	100.525
256.402	101.277	201.065
100.262	100.262	100.262
100.335	101.255	10.3879
201.825	113.276	103.075
100.007	100.007	100.007
100.216	10.9788	1.09875
100.099	100.099	100.431
100.733	100.733	100.733
201.327	100.667	100.834
100.007	100.007	5.56871
201.097	121.919	101.681
22.9474	100.188	100.22
100.501	100.465	1.88791
100.765	100.765	100.765
100.909	100.722	100.88
100.213	100.261	100.213
100.068	111.717	10.0692
100.034	100.034	101.97
100.032	100.04	100.032
100.269	100.009	100.269
100.64	100.64	100.64
101.689	100.527	101.169
201.966	101.111	101.376
100.109	100.109	100.109
201.424	201.302	102.263
100.675	10.2365	10.185
101.813	101.606	2.56691
223.473	111.678	1.39221
212.023	100.802	100.802
100	201.739	10.1051
100.094	100.094	2.14268
100.679	100.103	100.049
100.04	100.04	100.04
101.421	10.9382	10.9891
100.005	10.1218	100.005
214.767	101.286	2.20001
110.624	10.4434	100
100.622	100.996	1.43661
112.792	100.445	1.18021
100.523	100.599	1.94558
100.039	10.0218	10.0218
100.465	100.465	1.88791
100.202	100.013	100.013
100.465	100.465	1.88791
100	201.739	100.072
42.4514	100.413	3.90552
100.019	110.95	100.019
201.404	100.054	100.054
42.9623	100.069	100.8
200.884	200.884	200.884
100.196	10.8665	100.298
100	100	100
100.453	100.453	100.453
201.262	101.443	101.252
100.038	100.06	42.2525
100.002	100.002	100.002
101.029	100.061	11.0237
100.017	100.146	1.54664
100.764	100.662	2.61166
100	100	100
100.365	10.5802	100.537
100.007	100.007	100.338
201.037	100.01	1.23505
33.535	21.6278	1.4507
100.604	100	100
100.336	100.336	10.5936
101.057	101.136	101.489
100	100	100
100.604	100.007	1.27289
100.286	100.275	101.932
100.052	100.028	100.052
100.702	100.702	100.702
100	100	100.036
100	201.739	10.1051
100.522	100.013	100.013
111.226	201.457	1.80587
210.827	10.0537	10.0537
100	100.178	100
102.328	100.226	10.9537
101.136	100.226	10.9537
211.504	110.894	100.261
100.816	100.816	100.816
101.379	101.379	101.379
100.606	100.606	1.88791
100.072	130.242	112.229
101.932	11.62	100.011
212.315	100.703	100.87
100.455	11.0197	100.042
100.361	100.361	1.38455
100	100	1.03136
100	100	100
100	100	100
21.9905	21.4923	11.9436
100.016	100.016	100.016
100.64	100.64	100.64
100.395	100.395	1.42591
213.226	110.358	11.4086
100.608	100.503	1.42591
101.02	101.02	101.02
100	100	100
200.547	200.547	200.547
100	100	100
100.321	100.047	1.17957
100.534	100.465	1.88791
201.206	100.836	100.836
100	100	100
100.72	100.72	100.72
100.762	100.762	100.92
100.145	100.04	100.145
100.315	100.078	100.327
201.209	100.663	100.831
100.002	100	2.23766
100.525	100.533	1.01818
215.255	202.282	101.473
100	100	1.89819
100.292	100	10.029
100.532	100.183	100.183
100	100	100
100.952	21.7996	100.595
100.647	100.647	100
100	201.739	10.1051
201.156	111.611	101.557
201.006	1.26358	100.598
212.058	101.468	11.9755
100.554	100.418	1.84079
201.589	100	100
100.465	100.465	1.88791
100.704	100.013	100.013
100.041	100.772	100.041
100.007	10.1654	100.007
100.112	100	100.1
100.016	100.016	100.016
100.258	100.319	100.386
201.398	100.536	100.703
100.088	100.088	100.088
100.378	10.8741	100.378
100	11.0673	100.61
100.048	100.648	100.048
100	100	11.4316
100.068	100.144	100.068
201.048	100.052	1.2104
100.315	100.315	100.315
100	100	100
100.615	100.615	100.615
200.718	100.898	101.08
200.597	202.713	100.054
202.01	100.492	100.414
100.178	21.5428	100.598
100.062	300.643	100.014
248.143	100.079	100.402
100	100	100.012
100	10.121	10.2208
101.051	101.051	101.051
100.546	100.268	1.19892
100.02	100.02	100.22
100.015	10.0304	100.015
20.5151	100.182	100.055
100.335	100.009	100.388
100.018	100.018	10.0883
100.096	100.096	100.096
201.213	100.01	100.258
200.778	110.606	103.251
100.002	100.002	100.002
200.044	200.044	200.044
100.149	100	100.149
100	100	100
100.378	100.378	100.378
100	201.739	10.1051
100.244	100.244	100.244
100	100.978	100.036
100.057	100.088	100.057
203.583	102.212	103.621
100.008	100.008	100.008
100.388	100.377	100.388
100.022	100.022	100.022
100.418	100.418	1.84079
100	100.448	1.82112
100.006	100.623	10.5372
132.514	31.9365	11.7749
100	100	1.01544
100.011	10.1654	10.1013
100	100	100
101.076	101.578	1.26024
100.61	100.61	100.61
101.48	101.48	101.48
100	100	100
100.372	100.696	100.676
100.081	100	100.086
201.872	101.01	101.177
100.005	100.005	1.26153
100	100	100
100.102	100.252	1.03081
132.572	21.0362	111.203
100.172	100.172	100.172
202.597	201.178	1.61085
100.755	100.01	1.24405
100.103	100.062	10.9513
100	100	100
100.053	100.053	100.053
100	11.2863	100
100.291	100	100.29
100.633	100.633	101.513
201.256	212.791	101.973
100.01	100.01	100.01
100.118	31.9365	11.7749
100	100	100.129
100.08	100.08	100.08
100.325	100.357	100.357
100.738	100.738	100.738
101.779	101.246	1.38174
101.48	101.48	101.48
100.009	100.009	100.009
100.964	100.004	100.052
100.31	100.669	100.383
100.61	100.61	100.61
100.038	100.038	100.038
100.249	11.0673	100.249
33.8189	112.243	1.50685
100.123	100	100.012
100.066	100.066	100.066
100.372	100.696	100.372
100.256	10.3819	100.055
100.056	100.431	100.431
100.051	100.666	100.207
100.048	20.9635	10.6366
100.005	10.1517	100.049
100.099	100.099	100.099
100.851	100	100.106
100.58	100.013	10.3088
201.848	102.07	102.688
100.67	100.67	100.67
100.505	100.32	10.3061
100.162	100.115	100.162
100.095	100.103	100.185
100.964	100.964	100.964
100.344	100.395	10.1958
100.396	100.63	1.20253
100.138	100.08	100.263
33.211	100.062	2.86423
100.183	100.183	100.522
100.506	100	100.506
121.159	111.226	1.15106
100.748	100	2.69888
201.185	100.137	100.092
100.772	100.048	1.13244
201.959	100.941	100.966
100.465	100.465	1.88791
100.645	100.9	100.948
201.048	100.334	100.74
100.144	100.006	1.03708
101.172	100.198	100.198
100.433	100.433	100.433
100.26	100	1.07672
100.541	20.8932	100.229
100.092	100.092	101.092
200.525	100.893	101.511
100.086	100.086	100.086
100.465	100.465	1.88791
201.735	100.762	100.371
100.96	101.409	100.578
112.473	100	100
100.803	100.024	100.024
100.003	100.003	100.003
100.359	100.22	100.359
100.111	100.111	100.259
100.395	100.395	10.968
100.688	100.688	100.688
111.646	100.215	1.70779
100.255	100.72	1.88814
101.475	200.84	100.443
100.211	100.211	100.211
200.624	110.806	100.603
100.005	10.1433	10.1784
100.357	100.011	100.011
100.641	100.331	100.168
100.997	101.576	1.29107
101.61	100	100
100.099	100.643	10.6469
101.573	112.751	2.68724
100.566	101.286	2.20001
100.608	100.882	1.04115
100.002	100.002	100.002
100.23	100.08	100.23
100.053	100.636	1.42591
100.105	100.108	1.42591
100.382	100.382	100.382
100.092	100.092	101.431
111.818	111.717	101.763
100.655	100.655	2.14495
100.31	100.226	10.9537
201.401	101.438	2.76795
100	100	100
100.104	10.2507	100.073
235.099	101.811	1.57796
100.481	100.074	2.63839
100	201.739	10.1051
112.109	100.01	1.24405
100.465	100.465	1.88791
100.166	100.166	1.17265
100.465	100.465	1.88791
101.078	10.8187	1.09032
22.2885	100.603	100
225.718	100.06	31.7151
100.613	100.159	1.78568
100.733	100.114	100.733
100	100	100
110.775	20.8878	10.7751
100.009	100.009	100.083
100.054	100.054	100.054
100.465	100.465	1.88791
101.218	100.087	200.986
100.517	100.517	100.517
100.011	100.011	100.093
202.103	100.31	1.12661
111.14	111.6	1.96723
200.47	100.383	100.806
100.395	100.395	1.42591
101.185	10.6479	1.43332
100	100	100
122.035	100.03	2.12857
212.287	11.0234	100.268
100.547	100.636	1.42591
100.239	10.1392	10.1392
213.281	100.023	100.611
100.018	100.018	100.002
100	10.3688	1.88966
100.077	100.368	1.2305
100.006	100.006	100.006
100.254	100.254	1.28439
100.318	100	100
201.349	111.094	111.738
201.934	110.998	100.888
100.161	100.168	100.161
100	100	100
100.565	200.805	100.511
100	11.2215	100
100.465	100.465	1.88791
101.417	100.316	1.41884
100.114	100.194	100.114
124.178	110.866	1.5684
100.1	100.31	100.201
100	100	100
100.445	100.011	100.974
101.036	100.105	100.096
100.799	10.5279	10.6889
111.692	110.203	1.54211
100.379	111.357	2.2147
100.608	100.608	100.608
100.469	100.434	101.204
100.19	100.895	100.045
100.661	100.588	2.08066
100.138	100.138	100.138
100.011	100.011	11.2626
100	100	100
100.522	100.183	100.183
101.051	100.796	101.051
101.12	100.395	1.42591
100.033	100.04	100.145
20.8431	110.911	11.5194
100.038	21.0111	100.038
202.714	101.649	1.52856
134.165	201.28	3.23334
100.355	100.355	1.38592
100	100	100
124.537	112.952	2.93316
201.902	111.892	1.53327
266.332	1.8692	2.06801
100.009	100.009	100.002
100.099	100.01	100.087
21.1828	20.9648	100
100.274	100.226	11.2374
100.427	100.427	11.3942
200.312	111.457	2.50279
100	100	100
100.644	100.539	100.539
100.06	100.06	100.06
100.039	100.039	100.039
100.773	100.773	100.824
101.17	101.286	2.20001
100.031	20.9648	100.064
212.105	102.046	102.046
100.191	111.121	100.156
100.656	100.656	100.656
100.95	10.2213	101.674
100.671	21.0234	10.7563
100.885	10.4119	100.286
100.074	10.0168	100.074
100	100.103	100.049
100.019	100.25	1.28069
100.032	100.032	100.032
214.87	110.74	101.119
102.158	110.923	1.30169
100.186	10.1791	100.186
100.065	100	1.08338
215.014	100	100
111.356	100.699	100.867
100.796	100.796	100.796
101.097	100.572	100.51
100.397	10.1652	1.18502
100.017	100.017	1.11302
112.191	100.215	1.52458
100.017	200.208	100.017
100.198	100.117	101.079
100.534	100.534	100.534
100.155	100.155	1.2438
100.789	100.135	100.789
101.615	100.837	1.06265
100	100	100
102.164	100.24	1.06716
100.69	100.69	100.69
100.348	100	100
100.552	100.465	1.88791
100.691	100.691	100.691
100	100	10.0617
100.439	100	100.439
100.041	100.041	100.041
156.959	11.6759	1.62463
100.076	100.252	100.273
111.834	20.7044	101.362
100.919	20.8932	1.10419
100.007	100.052	1.26628
100.609	100.609	100.609
100.81	100.885	1.52458
100.103	100.103	1.08304
100.092	10.272	100.092
201.67	100.645	100.954
154.357	201.34	201.338
100.261	100.25	1.28069
100.017	100.017	100.017
100.199	20.3756	100.118
100.916	100.916	11.0213
100.442	100.442	2.24053
111.271	100.054	100.748
101.036	100.201	100.105
200.717	302.426	101.912
100.144	100.144	100.144
100.77	100.77	100.77
200.739	101.029	101.646
111.517	201.748	102.09
223.847	202.629	2.60561
100.944	111.762	1.78995
100.759	200.065	1.21361
100.523	100.178	100
122.604	201.747	102.109
101.089	101.286	2.20001
100.615	100.208	10.4527
202.371	100.632	100.799
100.004	100.004	100.004
100.715	100.715	100.715
100.465	100.465	1.88791
100.299	100.257	100.299
100.145	100.145	100.145
100.574	100.574	1.26503
277.886	1.29669	1.50463
100.409	100.011	1.46455
100.276	10.1946	100.087
100.11	100.11	100.11
226.106	111.514	1.20901
101.198	11.7716	22.5378
101.262	101.286	2.20001
100.219	100.011	100.219
23.9672	101.496	1.66001
100.042	100.533	100.042
22.5023	100.37	1.82842
100.083	100.083	100.083
100.704	100.013	100.013
100.848	100.092	100.013
100.013	101.125	100.013
100.55	100.55	100.55
200.363	110.981	100.062
100.018	100.018	100.018
100.814	100.814	100.814
201.731	31.0285	2.93775
100.31	100.323	10.8014
177.048	111.448	100.966
100.013	100.214	10.675
100.449	100	100.449
100.013	100.013	100.619
100.25	100.25	100.25
125.436	222.501	1.79189
100	100	100
124.105	123.29	100.515
100.006	100.006	100.006
200.652	200.208	100.017
100	201.739	10.1051
100	100	100
100.785	11.0673	100.692
100	100	100
100.382	100.099	100.417
100.153	100.153	11.0071
244.907	100.588	2.07283
100.017	100.017	1.11302
100.402	10.6428	100.402
100.003	10.0303	10.0303
100.341	100.315	1.37226
101.637	101.173	100.957
21.4899	100.521	10.4964
100.671	100.528	1.38124
100.103	100.103	1.08304
100	100	100
100.327	100.074	2.07661
100.725	112.256	11.3443
20.9873	20.783	11.2072
121.362	110.796	100.796
100.427	100.009	100.467
100.558	100.434	100.558
100	100	100
100.838	100	100.106
112.959	101.136	1.74612
100.717	100	21.7435
100.585	100.924	1.06873
100.134	100	100.134
200.449	200.449	200.449
100.028	100.054	100.333
201.84	100.882	1.04115
100.419	100	100.109
100.055	10.1318	111.215
42.44	110.082	10.0537
100.081	100.081	1.88791
100	100	100
100.207	100.207	1.42591
100.14	100.043	10.1814
100.607	21.8616	100.607
100.106	10.1911	10.1485
100.232	100	100
100	100.111	1.26916
100.121	100.121	100.926
100.039	10.0168	100.039
200.583	200.994	12.4609
100.18	20.4907	1.41488
100.574	100.38	1.41072
157.234	22.8811	2.36146
100.041	201.739	10.1051
100	100.626	10.4047
100	100	100
100.349	100	1.03081
125.347	100.467	1.88939
213.8	201.139	102.481
100.105	100.157	1.04178
100.772	10.411	100.944
100.465	100.081	1.88791
100.049	100.012	100.012
100.064	200.786	100.056
100.268	100.15	10.2641
100.101	100.101	100.101
214.526	10.5458	21.5955
100.465	100.465	1.88791
200.588	100.036	100.182
200.781	100.351	100.774
100	100	101.319
100.068	100.149	100.068
111.965	21.9111	112.088
100.418	100.418	1.84079
100.084	100.103	100.054
100.624	100.624	100.624
201.089	113.273	3.36391
202.095	10.6799	2.44181
100.249	100.012	100.172
100.201	100.048	10.1814
200.569	110.868	101.511
201.081	100.553	10.8788
100.135	100.213	100.046
100.14	100.149	10.688
200.964	201.114	100.778
100	100	100
100.478	100.893	100.478
100.418	100.418	1.84079
211.474	200.077	100.989
100.066	100.066	11.0519
100.117	100.117	100.117
100.007	100.007	100.007
100	100	100
100.189	100.005	100.005
100.536	100.536	100.536
100	10.4434	10.969
100.173	100.173	100.173
21.1796	110.924	100.095
100.22	100.116	100.116
100.902	100.902	100.128
100.08	10.1553	10.1121
100.014	100.014	100.014
100.23	100.08	100.23
100.057	100	100
212.048	101.063	1.67063
100	100	100
201.86	112.641	1.16907
100.014	100.052	1.26546
100.81	100.81	100.81
100.01	100.01	10.0775
101.103	11.2385	100.953
201.885	203.277	2.4242
112.086	111.157	200.483
100.153	100.153	100.153
100.085	10.1875	100.074
100.109	100.074	1.49744
100.418	100.418	1.84079
100	100	100
100.112	100.077	100.095
100.007	100.007	100.007
100.128	100.902	100.128
123.82	123.348	11.7548
259.323	101.901	102.488
100.006	100.801	100.023
100.334	203.51	100.917
100.418	223.542	12.2615
100.487	200.413	1.63546
100	100	100
100	100	100
100.295	200.677	100.295
200.555	200.562	100.599
211.851	110.606	2.62762
100.525	100.401	100.004
100.524	100.226	10.9537
112.41	100.011	100.413
100.097	100.097	100.097
101.146	101.044	1.68281
100.06	100.06	100.06
100	100	100
100.418	100.418	1.84079
101.613	111.014	1.41513
100.511	100.511	100.511
100.819	100.819	100.819
100.517	100.517	100.517
100.053	100.053	100.053
213.034	123.279	1.92443
100.38	10.4009	11.4534
100.804	100.804	100.804
100.452	100.014	100.02
100.608	10.3774	100.067
100	100	100
100.763	100	100.711
100	10.2955	100
101.656	101.656	101.656
36.3593	100.123	1.73574
100.268	100.261	100.299
100.281	100.281	100.281
203.273	202.473	102.962
100.448	100.125	1.24534
101.385	100.974	100.037
100.738	101.286	2.20001
100.047	100.1	100.047
100	100	10.8479
100.694	100.694	100.694
100.614	100.614	100.614
101.082	101.286	2.20001
214.405	101.891	102.509
100.096	100.096	100.096
100.77	21.2863	1.05513
201.665	100	1.49621
101.53	100.637	11.3704
100.637	100.054	100.004
100.38	100.38	1.41072
21.3155	100.054	100.343
100.187	100.503	100.092
100.178	100.178	100
100.679	100	100
200.634	112.639	11.6586
200.249	200.987	200.987
100.205	100.013	100.013
100.947	10.7543	100.133
214.235	23.0057	101.496
101.176	100.512	100.67
100.01	100.01	100.01
100.004	100.004	100.004
100.052	100.028	100.052
100.843	100.708	100.708
100.09	10.7317	10.7217
100.247	100.588	12.8263
101.435	100.588	1.22661
202.672	101.029	2.52255
100.079	100	100.077
100.006	100.006	1.2883
200.139	210.229	100.136
100.133	10.7138	1.06927
100.483	100.081	100.111
100.135	100.132	10.4334
100.325	100.357	100.325
22.4968	21.3001	3.50432
101.006	10.8823	10.2169
100.553	203.941	101.137
100.642	100.101	100.623
100.013	100.013	10.3088
100.395	100.395	1.42591
201.799	100.868	2.71022
100.618	100.521	20.4294
100.029	100.01	1.23197
100.982	11.2253	100.782
100.701	100.007	100.007
112.438	100.03	101.909
203.676	212.33	102.215
100	100	10.6785
100.073	100.073	100.073
100.074	10.0168	100.074
100	100	100
101.086	100.135	100.789
100.442	10.189	100.538
100.181	100.181	100.181
20.9202	10.7338	100.009
101.371	100.465	1.88791
100.395	100.395	1.42591
100.051	10.1908	100.088
223.802	110.59	1.0682
100.013	100.013	100.013
100.45	100.45	100.45
100.138	100.009	100.2
100.009	100.009	100.009
201.699	211.895	100.88
101.478	100	1.04115
100.092	101.067	100.901
100.105	100.105	100.201
101.307	100.995	100.007
100.963	101.904	101.904
100.081	100.081	100.081
100	100	100
200.743	100.521	10.567
110.701	110.369	101.125
100.861	22.0108	100.531
100.215	100.215	11.0494
100	100	100
100.01	100.456	1.00097
256.993	100.449	100.616
100.061	100.155	100.048
100.104	100.04	100.039
100.357	110.705	111.283
100.375	100.061	10.1061
100.169	100.169	100.169
100.475	100.475	10.8652
111.491	10.2318	10.7181
200.897	100.213	100.1
100.71	100.71	100.71
100.008	100.008	100.008
269.294	235.108	102.043
100.067	10.2203	10.3929
201.054	111.096	100.901
100.827	100.024	100.117
201.328	112.205	100.015
100	100.02	1.58865
100.245	100.005	1.07672
100.025	10.1255	100.006
100.172	100.172	100.172
202.254	100.418	1.84079
100.495	100.064	100.064
112.489	100.885	1.43839
100.122	100.122	100.122
100.053	10.1654	10.3588
100.028	100.028	100.028
100.113	201.739	100.072
101.615	101.14	101.609
101.365	100.527	100.668
100.483	100.397	100.39
100	100	10.7301
201.926	100.307	100.307
201.41	101.005	101.429
100.434	100.395	1.42591
134.917	102.503	103.515
233.875	100.102	10.7508
100.007	100.308	100.007
100.06	100.06	100.06
100.147	100.103	1.08304
100	100.882	1.04115
23.4721	22.4665	201.93
224.808	100.73	100.078
100.009	100.009	100.009
100.465	100.465	1.88791
100	100	100
134.286	100.465	1.88791
100	100	100.013
100.603	100.465	1.88791
100.395	100.636	1.42591
102.136	100.799	101.577
100.733	100.72	10.2477
256.874	10.9766	1.43718
100	100	100
100.094	100.095	100.095
100.013	100.013	100.619
100.633	111.314	1.19471
200.998	100.641	100.809
201.22	121.798	2.26721
124.11	100.347	1.19725
200.882	101.007	101.624
100.743	100.743	2.16505
101.092	100.139	101.092
100	100	100
100.342	100.252	100.15
100.253	100.208	100.128
100.424	100.008	100.008
100.086	100	100.063
100.103	100.045	10.1485
100.573	100.573	100.573
100.048	100.155	10.0253
100.465	100.465	1.88791
100	100	1.38592
101.648	101.648	101.648
100.1	100.1	100.1
100.897	100.897	1.24988
32.64	111.809	101.915
100.03	100.031	100.03
145.509	100.121	100.928
100.627	11.2289	100.181
100.094	100.094	100.094
55.2232	100.24	1.06716
101.639	101.045	1.41205
100.028	100.028	100.028
100.141	10.1913	10.1485
100.094	100	100.094
201.508	102.031	102.214
101.093	10.7676	1.75441
100.114	100.114	100.733
100.716	100.716	100.716
100.17	100.17	100.17
100	100	100
100	100.437	2.83932
100.052	100.411	100.383
135.713	11.8792	1.38389
100.046	100	100
112.052	100.588	1.26807
100.096	100.118	100.118
101.886	100.11	1.20862
100	100	100
101.158	10.2804	101.16
100.031	100.078	100.031
100.465	100.465	1.88791
100.749	100	10.8573
100.286	100.286	100.173
212.483	100.584	100.742
201.236	101.075	101.693
100.031	100.261	100.031
100.763	100	100
100.121	130.198	100.121
200.984	110.734	10.1427
100.718	100.718	100.718
100.214	100.175	100.214
100.132	100.013	10.3088
22.0502	101.076	1.71303
100.343	100.054	11.0459
100.1	200.793	1.78502
100	100	100
266.945	10.6015	100.262
100	100	100
100.067	100.004	100.067
100.601	100.465	1.88791
100.032	100.002	100.002
100.055	100.045	10.1378
101.543	100.411	101.31
100	100	10.1992
100.454	100.454	100.454
100	100.882	1.04115
100.465	100.465	1.88791
100.774	100.378	100.378
100.045	111.739	10.0397
100	100	100
101.154	100.01	1.24405
111.379	100.066	11.2066
100.254	100.254	100.254
111.832	10.8089	100.75
100.038	100.038	100.038
100.005	100.005	10.6298
101.318	21.7428	101.38
100.612	100.569	1.06561
100	100	100
100.053	10.6428	100.402
202.31	112.019	1.69198
100	100.779	100.006
100.085	100.15	10.3774
200.811	200.967	100.828
100	100	100
258.962	21.3773	100.13
100	100	100
100.172	100.172	100.172
100.58	100	100
111.685	101.181	10.9686
100.152	100.954	1.56347
100.53	101.326	100.548
212.821	100.578	2.48927
102.15	30.9396	11.7749
200.547	200.547	200.547
100	100.452	100.932
100.649	10.7785	10.2392
100.365	100.143	10.7797
100.051	100.051	100.051
101.168	100.353	101.168
100.258	100.01	1.23197
100.869	101.056	100.709
100.566	101.286	2.20001
22.7812	31.9365	101.854
112.588	111.599	101.811
264.865	185.714	4.52611
202.746	101.553	3.16303
100.062	113.428	2.93316
100.015	200.786	100.015
100.022	100.091	100.045
100.1	100	100
100.095	100.748	1.0137
226.898	101.945	103.548
100.695	100.787	100.695
212.217	212.993	3.6074
235.22	21.8383	100.506
100	100	100
244.072	203.441	100.637
100.25	10.4888	21.601
101.289	100.353	100.731
31.5575	10.2977	100.002
200.549	110.582	101.567
122.566	31.4318	111.693
100.495	100.495	100.434
100.424	100.01	1.23505
100.035	100.035	100.035
100.115	100.115	100.115
100.006	100.155	100.006
225.903	100.026	1.93813
100.857	100.954	1.56347
201.768	102.514	1.53565
100.505	10.2283	100.392
100.553	10.1392	100.553
100.029	200.646	200.71
100.698	100.174	100.638
100.085	100.085	100.085
100.095	100.183	11.6152
100	100	100
100	100	100
100.057	100.261	100.028
201.116	100	100
100.095	100.103	1.08304
100	100.103	100
100.145	100.503	100.143
100.465	100.539	1.88791
122.639	21.4929	100.039
100	201.739	10.1051
100.555	100.418	1.84079
100.574	100.574	100.574
201.511	200.865	11.0961
100.105	111.218	10.2913
173.381	10.041	10.0996
100	100	100
100.509	11.2289	100.181
100.614	100.614	100.614
100.039	100.034	100.034
100.07	201.739	10.1404
100.038	100.578	1.03081
100.006	100.006	100.445
201.331	200.804	100.624
111.33	11.5841	2.36877
223.524	222.488	1.77927
100	100	100
100.136	100.278	100.136
100.503	100.116	10.7231
110.999	10.8021	100.077
143.543	100.723	100.632
100.018	100.018	100.018
100.125	10.7053	100.125
100.785	100.785	100.785
100.541	100.007	1.26628
100.507	10.7982	1.04212
201.185	100.108	100.108
100.357	100.357	100.357
100.776	100	100.056
100.095	100.103	1.08304
100.317	100.017	1.00593
100	100	100.04
100.566	101.286	2.20001
100	100	100
100.145	100.503	100.143
100.712	100	100
100.722	100.013	101.749
100	100	100.831
200.327	200.17	100.622
100.065	100.067	100.065
101.791	100.008	100.008
31.7144	10.7138	1.11565
110.491	100.167	1.12109
100.005	10.1597	1.15646
100.022	100.022	100.022
100	100	100
100.227	100.01	10.6366
213.09	201.237	1.55502
200.058	211.734	110.057
100.065	100.457	1.30859
202.433	112.42	2.55146
100.608	100.608	100.608
100.568	100.568	100.568
100.089	100.089	100.089
100.144	100.149	10.688
201.152	100.381	20.5091
100	100	100
200.858	100.877	100.877
100	100	100
201.592	201.407	101.097
100	100.827	100.64
100.714	101.069	100.545
100.061	111.096	1.03444
200.543	41.295	100.018
101.153	100.035	1.1517
100.084	100.084	100.084
100.162	100.146	1.54664
100.202	100.202	100.202
100.448	10.7252	10.8916
200.926	110.597	200.527
201.032	200.899	101.35
100.014	100	100
222.467	100.043	1.7134
100.511	100	1.04115
100.343	100.343	100.343
201.3	111.611	101.557
100.945	100.099	1.42591
201.903	11.0481	1.2788
100	100.31	100
100.125	100.125	100.125
100.947	100.081	100.121
100.572	10.7943	100.655
100.58	100	100.013
100	100	100
257.097	100.567	11.8621
245.297	100.066	1.23319
100.315	100.315	100.315
100.012	100.046	10.0624
113.018	1.17531	1.17531
100.054	100.261	100.054
100.574	100.574	100.572
100.433	100.162	100.588
124.236	100	101.054
100.15	100.15	100.118
102.017	111.857	101.761
100.112	100.04	100.754
100.051	100.103	1.08304
112.769	100.688	1.43949
100.33	10.6041	100.36
102.482	102.867	2.20781
211.624	100.268	100.08
100.009	100.009	100.009
100.818	110.759	1.11273
100.08	100	100.1
100.319	11.0778	100.319
100.007	100.007	100.14
100.395	100.395	1.42591
100	100	100
112.39	200.89	2.28965
100.582	100.345	100.345
100.558	100.555	100.088
100.315	113.931	1.29349
100.031	100.031	100.031
100.649	100.649	100.649
100.078	100.02	100.078
100.311	100.242	100.311
100.426	100.004	100.004
164.288	100.75	100.629
100.049	100.049	100.047
100.351	100.438	1.62878
100.297	100.008	100.264
100.862	100.862	100.483
214.14	111.259	1.29943
100.049	100.049	100.049
100.672	100.672	100.672
100.054	100.054	102.928
100.003	100.003	100.003
100.016	100.016	11.2408
100.103	100.004	100.004
100.498	100.488	100.498
100.073	100.073	100.073
100.117	100.117	100.64
187.142	33.3635	3.12779
213.454	110.887	101.243
100	100	100
100.287	201.739	10.1051
100.161	100.161	100.161
101.379	101.379	101.379
200.616	200.588	100.028
100.655	201.739	10.1051
101.648	101.648	101.648
100.053	100.503	100.09
100.107	100.107	100.107
101.691	101.69	101.69
100.062	20.9004	100.062
100.266	101.62	101.62
100.349	10.2231	100.313
101.048	101.66	1.97381
100.397	100.377	100.999
100.673	10.1913	100.096
[truncated: 1,747 more rows]
